# Supplementary material for: The short chain fatty acid butyrate prevents intracellular replication of Legionella by regulating cysteine levels in macrophages
Source: Research Square preprint supplement (doi:10.21203/rs.3.rs-829027/v1), 2021-08-31
Supplement: Supplementary file 1 [file 74a3e027b17aba46a8d1d2b5.xlsx]

## Sheet: Sheet1
Mass	RT	FORMULA	Isomers	Putative metabolite	confidence	Central	DB	ppm	RT%err	altPPM	Groups	BP	mzdiff	relation.ship	addfrag	Cisotope %error	Related peaks	RSD:QC	maxRSD	max intensity	relation.id	TvsCTRL	Pvalue	Adduct	Polarity	Detections	nFla_rep_1	nFla_rep_2	nFla_rep_3	nFla_rep_4	nFla_rep_5	nFlaB_rep_1	nFlaB_rep_2	nFlaB_rep_3	nFlaB_rep_4	nFlaB_rep_5	PQC_1	PQC_2	PQC_3	PQC_4	PQC_5	UI_rep_2	UI_rep_3	UI_rep_4	UI_rep_5	UIB_rep_1	UIB_rep_2	UIB_rep_3	UIB_rep_4
238.099	10.5316	C8H18N2O4S	1	HEPES	7	0	Medium	-0.366551	5.79502		nFla'nFlaB'PQC'UI'UIB	HEPES	0	bp		-0.1	xC13xS34x2-merx3-merxNa+	0.3	0.3	4240000000	pos1	0		H	posneg	24	2210000000	2210000000	2060000000	2130000000	2550000000	2370000000	2060000000	2560000000	2250000000	2710000000	4240000000	2490000000	2660000000	2670000000	2030000000	2530000000	2380000000	2570000000	2470000000	2370000000	2660000000	2120000000	2150000000
131.069	14.0632	C4H9N3O2	2	Creatine	10	Central	KEGG_Metacyc_HMDB	-0.251925	-0.0693002	-0.263232	nFla'nFlaB'PQC'UI'UIB	Creatine	0	bp		-0.1	xN15x-H2OxK+x2-merxO18xC13	0.09	0.09	4200000000	pos0	0		H	posneg	24	3490000000	3460000000	3640000000	3900000000	3620000000	3790000000	3200000000	3760000000	4020000000	4010000000	4040000000	4080000000	4130000000	3790000000	3330000000	3850000000	4080000000	4070000000	3970000000	3680000000	3450000000	3820000000	3620000000
238.099	10.1222	C8H18N2O4S	1	HEPES	7	0	Medium	-0.38797	1.98484		nFla'nFlaB'PQC'UI'UIB	HEPES	0	bp				0.47	0.47	3940000000	pos2	0		H	pos	24	1690000000	1560000000	1380000000	1530000000	1780000000	1820000000	1440000000	1890000000	1660000000	2080000000	3940000000	1790000000	1750000000	1950000000	1360000000	1600000000	1610000000	1770000000	1680000000	1700000000	1990000000	1610000000	1590000000
183.066	14.3255	C5H14NO4P	1	Choline phosphate	10	Central	KEGG_Metacyc_HMDB	0.0170177	0.405921	0.0368307	nFla'nFlaB'PQC'UI'UIB	Choline phosphate	0	bp		0.1	xNa+x2-merxO18xC13xK+	0.22	0.22	2350000000	pos3	0		H	posneg	24	1140000000	1050000000	922000000	1180000000	1280000000	2080000000	1410000000	2130000000	2200000000	2140000000	2350000000	2090000000	1780000000	1960000000	1240000000	1740000000	1670000000	2060000000	1760000000	2240000000	2140000000	1910000000	1880000000
257.103	13.6606	C8H20NO6P	1	sn-glycero-3-Phosphocholine	10	Central	KEGG_Metacyc_HMDB	-0.697475	-0.0713439	-0.558533	nFla'nFlaB'PQC'UI'UIB	sn-glycero-3-Phosphocholine	0	bp		0.1	xNa+xK+xC13x-H2OxO18x2-mer	0.12	0.13	1730000000	pos4	0		H	posneg	24	1150000000	1310000000	1310000000	1270000000	1340000000	1720000000	1230000000	1480000000	1630000000	1630000000	1730000000	1370000000	1390000000	1420000000	1250000000	1240000000	1120000000	1290000000	1290000000	1260000000	1200000000	1140000000	1380000000
130.111	17.7279	C6H14N2O	2	&epsilon;-aminocaproamide	7	0	Metacyc	0.0534889	42.3779	0.0880714	nFla'nFlaB'PQC'UI'UIB	&epsilon;-aminocaproamide	0	bp		-0.4	xN15xC13xO18x-H2O	0.03	0.68	1490000000	pos5	0		H	pos	24	896000000	958000000	947000000	35700000	1020000000	932000000	799000000	891000000	693000000	960000000	949000000	924000000	869000000	932000000	897000000	963000000	1490000000	1240000000	43900000	807000000	984000000	938000000	58300000
260.081	10.5516		0		0.1			-0.611423	#N/A		nFla'nFlaB'PQC'UI'UIB	HEPES	0	bp	xNa+	0.1	xC13xNa+x3-merx2-mer	0.54	0.54	1300000000	pos6	0		Na	posneg	24	1180000000	1190000000	1280000000	1130000000	1190000000	1170000000	1210000000	1130000000	1170000000	1080000000	31300000	1170000000	1250000000	1190000000	1220000000	1190000000	1230000000	1300000000	1140000000	1240000000	1220000000	1180000000	1130000000
498.18	10.3758		0		0.2			2.60173	#N/A		nFla'nFlaB'PQC'UI'UIB	Ala-Met-Asp-Tyr	0	bp		-4.9	xC13	0.51	0.51	633000000	pos7	0		H	pos	24	488000000	489000000	457000000	436000000	558000000	526000000	466000000	547000000	487000000	566000000	23900000	298000000	283000000	287000000	230000000	514000000	521000000	633000000	471000000	481000000	548000000	464000000	445000000
115.063	12.1572	C5H9NO2	3	L-Proline	10	Central	KEGG_Metacyc_HMDB	0.163612	0.139082	0.222628	nFla'nFlaB'PQC'UI'UIB	L-Proline	0	bp		0.3	xNa+xC13xN15xACNx2-mer	0.29	0.29	588000000	pos9	0		H	posneg	24	288000000	352000000	308000000	402000000	472000000	432000000	304000000	444000000	423000000	467000000	588000000	468000000	454000000	475000000	235000000	421000000	440000000	492000000	447000000	382000000	457000000	347000000	435000000
146.069	14.631	C5H10N2O3	6	L-Glutamine	10	Central	KEGG_Metacyc_HMDB	0.054363	0.589869	0.084784	nFla'nFlaB'PQC'UI'UIB	L-Glutamine	0	bp		-0.1	x-NH3xK+x-FAxC13xO18	0.51	0.51	536000000	pos10	0		H	pos	24	203000000	184000000	163000000	144000000	244000000	239000000	132000000	217000000	189000000	258000000	536000000	297000000	221000000	237000000	151000000	250000000	306000000	376000000	223000000	237000000	309000000	205000000	139000000
211.036	14.9995	C4H10N3O5P	1	Phosphocreatine	8	Central	KEGG_Metacyc_HMDB	0.0810724	-44.8299		nFla'nFlaB'PQC'UI'UIB	Phosphocreatine	0	bp			xNa+xO18xK+x-NH3x-H2Ox2-mer	0.55	0.55	529000000	pos8	0		H	pos	24	141000000	141000000	204000000	184000000	150000000	186000000	174000000	145000000	229000000	157000000	529000000	241000000	184000000	197000000	195000000	189000000	149000000	184000000	168000000	222000000	178000000	160000000	191000000
192.111	12.6856	C7H13NO4	3	N-Carboxyethyl-g-aminobutyricacid	7	0	HMDB	0.381714	-4.11302		nFlaB'PQC'UI	N-Carboxyethyl-g-aminobutyricacid	0	bp				0.07	1.76	495000000	pos11	0		NH3	pos	24	10400000	57400000	14000000	21600000	495000000	6580966	27900000	36900000	16600000	9196543	51700000	46100000	45000000	43200000	49700000	9947412	9023935	12600000	3.36879e+06	17200000	9536859	55700000	6.14459e+06
125.015	15.0972	C2H7NO3S	1	Taurine	10	Central	KEGG_Metacyc_HMDB	0.138018	1.12367		nFla'nFlaB'PQC'UI'UIB	Taurine	0	bp		-0.2	xS34xNH3x-H2OxC13xACNx2-merx3-merxK+xNa+	0.34	0.34	460000000	pos12	0		H	posneg	24	159000000	157000000	224000000	187000000	174000000	248000000	228000000	205000000	254000000	216000000	460000000	269000000	233000000	234000000	245000000	226000000	247000000	283000000	209000000	246000000	260000000	244000000	226000000
127.946	10.9982										nFla'nFlaB'PQC'UI'UIB		0	bp			xC13xO18	0.59	0.59	347000000	pos13	0			pos	24	313000000	301000000	336000000	304000000	254000000	289000000	347000000	253000000	294000000	235000000	903100	279000000	223000000	244000000	342000000	265000000	283000000	270000000	235000000	286000000	267000000	325000000	290000000
113.059	9.16416	C4H7N3O	1	Creatinine	10	Central	KEGG_Metacyc_HMDB	0.26699	0.204871		nFla'nFlaB'PQC'UI'UIB	Creatinine	0	bp		0.1	x2-merxN15xC13xNa+	0.44	0.44	326000000	pos14	0		H	posneg	24	127000000	124000000	133000000	103000000	157000000	168000000	110000000	146000000	182000000	163000000	326000000	196000000	88500000	204000000	162000000	167000000	80200000	166000000	131000000	157000000	170000000	123000000	162000000
814.693	7.2829	C47H95N2O6P	3	SM(d18:0/24:1(15Z))	7	0	KEGG_HMDB	0.463917	45.0768		nFla'nFlaB'PQC'UI'UIB	SM(d18:0/24:1(15Z))	0	bp		0.7	xC13xNa+xK+	0.48	0.48	317000000	pos15	0		H	pos	24	130000000	137000000	114000000	100000000	157000000	130000000	85700000	137000000	130000000	153000000	317000000	162000000	116000000	159000000	111000000	120000000	122000000	157000000	161000000	125000000	151000000	98900000	123000000
127.946	9.15839										nFla'nFlaB'PQC'UI'UIB		0	bp				0.57	0.57	312000000	pos16	0			pos	24	289000000	280000000	301000000	290000000	268000000	274000000	312000000	263000000	285000000	250000000	810295	259000000	269000000	250000000	306000000	270000000	280000000	277000000	263000000	283000000	290000000	305000000	283000000
161.105	12.5057	C7H15NO3	2	L-Carnitine	10	Central	KEGG_Metacyc_HMDB	0.00677479	-0.0207915	-0.0410092	nFla'nFlaB'PQC'UI'UIB	L-Carnitine	0	bp		-0.4	xC13xO18xN15	0.04	0.16	282000000	pos17	0		H	pos	24	164000000	175000000	210000000	181000000	215000000	147000000	147000000	148000000	200000000	141000000	214000000	193000000	209000000	207000000	207000000	235000000	223000000	282000000	246000000	166000000	181000000	165000000	193000000
127.946	1.78288				0.4						nFla'nFlaB'UI'UIB		0	bp				0.88	0.88	270000000	pos18	0			pos	24	139000000	134000000	179000000	140000000	102000000	116000000	179000000	83000000	125000000	76200000	1687160	106000000	96300000	82400000	270000000	109000000	135000000	114000000	81900000	116000000	82500000	158000000	140000000
759.578	3.83831	C42H82NO8P	48	PC(34:1)	8	Central	0	-0.00497069	-4.21258	-0.00104454	nFla'nFlaB'PQC'UI'UIB	PC(34:1)	0	bp		-1.5	xC13	0.06	0.07	241000000	pos19	0		H	pospos	24	223000000	208000000	205000000	232000000	214000000	195000000	202000000	196000000	226000000	218000000	232000000	210000000	207000000	205000000	198000000	241000000	205000000	222000000	211000000	220000000	205000000	215000000	217000000
127.946	5.72433										nFla'nFlaB'UI'UIB		0	bp				0.58	0.58	234000000	pos21	0			pospos	23	201000000	234000000	218000000	193000000	173000000	185000000	232000000	165000000	180000000	154000000	0	187000000	166000000	159000000	221000000	181000000	202000000	161000000	156000000	190000000	175000000	215000000	198000000
307.084	14.2168	C10H17N3O6S	3	Glutathione	8	Central	KEGG_Metacyc_HMDB	0.192176	-20.5038	1.67314	nFla'nFlaB'PQC'UI'UIB	Glutathione	0	bp		0.9	x-NH3xNa+xC13xK+	0.26	0.26	224000000	pos22	0		H	posneg	24	188000000	208000000	157000000	187000000	224000000	125000000	76100000	128000000	136000000	125000000	206000000	175000000	151000000	156000000	93500000	140000000	119000000	126000000	137000000	135000000	124000000	88700000	101000000
103.1	18.8262		0		#N/A			0.0747012	#N/A	0.00815198	nFla'nFlaB'PQC'UI'UIB	Choline	0	bp		-0.2	xC13	0.03	0.68	196000000	pos24	0		H	pos	24	122000000	120000000	142000000	6336265	142000000	196000000	155000000	160000000	3.74771e+06	171000000	152000000	156000000	166000000	159000000	157000000	119000000	140000000	160000000	1.85779e+06	47900000	126000000	130000000	2.62322e+06
183.066	13.9208		0		0.2			-0.159967	#N/A	0.116184	nFla'nFlaB'PQC'UI'UIB	Choline phosphate	0	bp		0.4	xC13	0.26	0.54	196000000	pos25	0		H	pos	24	91500000	43300000	30900000	25300000	57400000	164000000	119000000	129000000	62800000	196000000	114000000	95700000	59600000	89600000	68300000	22700000	68500000	43500000	31500000	84500000	179000000	192000000	49000000
785.593	3.57771	C44H84NO8P	80	PC(36:2)	8	Central	Lipidmaps	0.0306324	-11.8032	0.0352144	nFla'nFlaB'PQC'UI'UIB	PC(36:2)	0	bp		-0.4	xNa+xC13	0.03	0.07	195000000	pos26	0		H	pos	24	173000000	176000000	158000000	176000000	195000000	176000000	158000000	182000000	188000000	175000000	174000000	166000000	164000000	173000000	163000000	184000000	162000000	181000000	183000000	173000000	194000000	174000000	182000000
127.946	3.01736										nFla'nFlaB'PQC'UI'UIB		0	bp				0.64	0.64	191000000	pos28	0			pos	24	150000000	153000000	186000000	153000000	117000000	134000000	190000000	106000000	144000000	119000000	1.70352e+06	124000000	119000000	101000000	191000000	128000000	151000000	128000000	96600000	129000000	96200000	167000000	149000000
127.946	2.30835										nFla'nFlaB'PQC'UI'UIB		0	bp				0.67	0.67	189000000	pos29	0			pos	24	147000000	144000000	185000000	153000000	111000000	128000000	189000000	96800000	137000000	90100000	1.70352e+06	113000000	96300000	84800000	177000000	115000000	145000000	108000000	88500000	159000000	81600000	164000000	150000000
240.094	10.2811				0.2						nFla'nFlaB'PQC'UI'UIB		0	bp				0.39	0.39	176000000	pos30	0			pos	24	79400000	82000000	71600000	88000000	86800000	86200000	74300000	86600000	79300000	102000000	176000000	91400000	87000000	92300000	73300000	86600000	75800000	72800000	90400000	79500000	98800000	73200000	80800000
295.059	13.6497		0		0.1			0.816272	#N/A		nFla'nFlaB'UI'UIB	hexanediol 1,6-bisphosphate	0	bp	xK+	1.7	xC13	0.75	0.75	172000000	pos31	0		NH3	pos	23	108000000	116000000	172000000	114000000	108000000	114000000	156000000	87500000	97800000	99300000	0	59000000	89000000	72000000	157000000	87000000	98000000	83700000	41200000	59000000	60200000	117000000	96800000
759.578	4.52768	C42H82NO8P	48	PC(34:1)	8	Central	0	-0.241023	11.6545	-0.24251	nFla'nFlaB'PQC'UI'UIB	PC(34:1)	0	bp				0.07	0.24	166000000	pos32	0		H	pos	24	111000000	121000000	116000000	110000000	138000000	52400000	102000000	95100000	107000000	94300000	166000000	147000000	155000000	149000000	136000000	101000000	124000000	124000000	121000000	115000000	120000000	103000000	131000000
103.1	18.3198		0		#N/A			-0.122195	#N/A	-0.227693	PQC	Choline	0	bp		0	xC13xN15xO18	0.03	1.54	166000000	pos33	0		H	pos	24	1.93607e+06	96300000	142000000	36400000	18500000	3.35211e+06	16600000	53200000	124000000	3978778	153000000	157000000	166000000	159000000	157000000	119000000	9368737	14300000	1.80082e+06	147000000	3.12026e+06	1.45257e+06	2086683
221.109	8.50231		0		0.4			-0.298054	#N/A	-0.308221	nFla'nFlaB'UI'UIB	CAPS	0	bp		-0.1	xC13xNa+xS34	1.24	1.24	158000000	pos35	0		H	posneg	24	17200000	19600000	13700000	14000000	23500000	21600000	14300000	23200000	18300000	26400000	158000000	26600000	17500000	28300000	16400000	21500000	14600000	20700000	19500000	20600000	25500000	15700000	18400000
262.139	14.062		0		0.1			-0.722748	#N/A		nFla'nFlaB'PQC'UI'UIB	Streptidine	0	bp	x2-mer			0.31	0.45	146000000	pos27	0		H	pos	24	73400000	77400000	61500000	80400000	90200000	105000000	25200000	101000000	146000000	111000000	141000000	129000000	115000000	120000000	52500000	94400000	115000000	145000000	144000000	87900000	100000000	74300000	78500000
336.164	17.3492		0		#N/A			2.51973	#N/A	-0.292501	nFla'nFlaB'PQC'UI'UIB	Pergolide	0	bp		-6.9	x-H2OxC13xO18xNa+	0.02	0.13	141000000	pos37	0		Na	posneg	24	99500000	98500000	121000000	129000000	104000000	120000000	101000000	111000000	141000000	107000000	130000000	130000000	125000000	130000000	125000000	121000000	110000000	137000000	117000000	120000000	107000000	108000000	116000000
127.946	4.55343										nFla'nFlaB'UI'UIB		0	bp				0.65	0.65	140000000	pos38	0			pos	23	107000000	98900000	130000000	95300000	82300000	91000000	136000000	82800000	86900000	66000000	0	84800000	82700000	74300000	140000000	92800000	107000000	88400000	72400000	90600000	69200000	120000000	107000000
702.568	4.5222	C39H79N2O6P	7	SM(d34:1)	8	Central	Lipidmaps	0.991394	11.5475		nFla'nFlaB'PQC'UI'UIB	SM(d34:1)	0	bp		2.8	xC13	0.14	0.14	139000000	pos34	0		H	pos	24	124000000	131000000	118000000	128000000	137000000	128000000	113000000	123000000	126000000	134000000	123000000	102000000	102000000	97800000	84700000	139000000	110000000	134000000	137000000	123000000	122000000	113000000	127000000
193.095	13.9464	C7H12O5	7	3-Propylmalate	8	Central	KEGG_Metacyc_Lipidmaps	0.881849	22.8509		nFlaB'PQC	3-Propylmalate	0	bp				0.15	1.85	138000000	pos39	0		NH3	posneg	23	1.93285e+06	15400000	2.74652e+06	2.75202e+06	138000000	1051883	4.18169e+06	4.75548e+06	1.37697e+06	1.99024e+06	9842930	7979997	9139554	9137892	6.55379e+06	2470778	2.20652e+06	2.70997e+06	0	2.32742e+06	1808500	5.37138e+06	393951
127.946	31.5294										nFla'nFlaB'PQC'UI'UIB		0	bp				0.12	0.66	136000000	pos40	0			pos	24	27000000	46900000	62500000	100000000	45700000	29800000	48000000	47200000	88300000	34400000	86900000	71800000	68000000	69900000	64500000	65500000	43600000	37700000	136000000	75300000	29100000	32400000	134000000
256.24	3.62161	C16H32O2	27	Hexadecanoic acid	8	Central	KEGG_Metacyc_Lipidmaps_HMDB	-0.206016	-1.78851	-0.236828	nFla'nFlaB'PQC'UI'UIB	Octadecanoic acid	-28.0312	bp		-0.2	xC13	0.05	0.31	134000000	neg1	0		H	neg	24	127000000	66500000	78900000	76400000	126000000	102000000	134000000	98200000	123000000	93600000	120000000	112000000	109000000	110000000	105000000	63500000	70000000	66300000	80500000	97300000	129000000	91500000	114000000
785.593	4.03875	C44H84NO8P	80	PC(36:2)	8	Central	Lipidmaps	-0.104679	0.959357	-0.103095	nFla'nFlaB'PQC'UI'UIB	PC(36:2)	0	bp		-0.7	xC13x-FA	0.1	0.16	134000000	pos36	0		H	pospos	24	116000000	122000000	103000000	85000000	129000000	113000000	99100000	120000000	123000000	128000000	134000000	118000000	105000000	113000000	109000000	104000000	133000000	133000000	126000000	120000000	125000000	117000000	121000000
476.197	10.5567		0		0.1			1.45839	#N/A		nFla'nFlaB'UI'UIB	[Fv hydroxy,methoxy(4:0/2:0)] 3,2',4',6'-Tetrahydroxy-4-methoxy-3',5-diprenyldihydrochalcone	0	bp	x2-mer	-9	xS34xC13	1.24	1.24	129000000	neg2	0		Cl	neg	24	10000000	13000000	10500000	9516536	21100000	15900000	8492233	19300000	13800000	25600000	129000000	18400000	19700000	23800000	10200000	18100000	17000000	22100000	14000000	13100000	16900000	10200000	7997010
203.116	10.115	C9H17NO4	1	O-Acetylcarnitine	8	Central	KEGG_Metacyc_HMDB	0.151183	13.6326	0.181137	nFla'nFlaB'PQC'UI'UIB	O-Acetylcarnitine	0	bp		0.3	xC13	0.18	0.18	122000000	pos42	0		H	pos	24	49000000	55000000	58200000	56300000	65900000	82400000	61400000	75300000	95900000	76900000	122000000	86000000	87300000	101000000	80000000	86400000	83500000	98300000	96700000	110000000	102000000	97200000	114000000
211.088	12.6141										nFla'nFlaB'PQC'UI'UIB		0	bp				0.29	0.29	117000000	pos44	0			pos	24	67100000	69700000	53000000	73400000	90300000	82300000	56700000	91600000	74400000	92100000	117000000	90400000	85800000	87900000	47600000	108000000	94300000	99300000	87700000	77300000	89700000	72600000	75600000
499.183	10.3545		0		0.2			-0.0151414	#N/A		nFla'nFlaB'PQC'UI'UIB	Arg-Met-Asp-Gly	0	bp	xC13			0.53	0.53	117000000	pos47	0		Na	pos	24	60800000	93700000	47300000	92400000	61600000	105000000	93200000	104000000	98000000	111000000	6091765	102000000	107000000	117000000	88900000	102000000	114000000	104000000	97500000	102000000	112000000	91700000	94600000
322.055	10.4499							-3.91733			nFla'nFlaB'PQC'UI'UIB		0	bp		C9	x-H2OxS34xC13x-H2O	0.59	0.59	115000000	pos49	0			pos	24	102000000	99700000	103000000	102000000	90400000	94100000	106000000	82700000	89400000	75900000	552203	98200000	91400000	72400000	115000000	88900000	94100000	89700000	86400000	89800000	86900000	104000000	98200000
127.946	3.93207										nFla'nFlaB'UI'UIB		0	bp				0.67	0.67	114000000	pos50	0			pos	23	70300000	81500000	106000000	86100000	60400000	79600000	112000000	56900000	72300000	51200000	0	67900000	66400000	56500000	114000000	60100000	71200000	64300000	37100000	60700000	55400000	94000000	93000000
787.666	7.24106				0.1						nFla'nFlaB'PQC'UI'UIB		0	bp	xC13	C30	xNa+xC13xK+xFA	0.47	0.47	113000000	pos45	0			pos	24	40800000	55200000	46300000	24500000	75200000	39900000	23700000	49800000	49500000	56000000	113000000	52000000	50000000	55200000	39300000	25900000	45000000	60800000	61300000	34600000	36800000	26100000	41400000
702.568	5.22561	C39H79N2O6P	7	SM(d34:1)	8	Central	Lipidmaps	0.990683	23.4539		nFla'nFlaB'PQC'UI'UIB	SM(d34:1)	0	bp				0.38	0.38	107000000	pos51	0		H	pos	24	28800000	48700000	34300000	45000000	52400000	38800000	32600000	41300000	41100000	41800000	107000000	53800000	50700000	64000000	46500000	28700000	28100000	35700000	51300000	29700000	27800000	29100000	32000000
103.063	14.8786	C4H9NO2	15	4-Aminobutanoate	10	Central	KEGG_Metacyc_Lipidmaps_HMDB	0.197292	0.0917078	0.271205	nFla'nFlaB'PQC'UI'UIB	4-Aminobutanoate	0	bp		0	xO18xC13x-H2Ox-NH3xN15	0.59	0.59	107000000	pos52	0		H	pos	24	61700000	43200000	41900000	22600000	54200000	101000000	72400000	71200000	36600000	87200000	107000000	42000000	36700000	39100000	36800000	45200000	79500000	93400000	25000000	40800000	97300000	89200000	25900000
127.946	29.9051				0.2						nFla'nFlaB'PQC'UI'UIB		0	bp				0.16	0.77	105000000	pos46	0			pos	24	17300000	30900000	40600000	73400000	26900000	19900000	31000000	31900000	62200000	23100000	63600000	51700000	52100000	62500000	42300000	45700000	27100000	24500000	103000000	51600000	20500000	18500000	105000000
211.088	13.3148										nFla'nFlaB'PQC'UI'UIB		0	bp			xK+	0.18	0.18	105000000	pos43	0			pos	24	73800000	70300000	63500000	84700000	79000000	79500000	74800000	83700000	81400000	79300000	105000000	82500000	76900000	78800000	63900000	102000000	83700000	84000000	99400000	89300000	89700000	82600000	85700000
211.088	10.9588				0.4						nFla'nFlaB'UI'UIB		0	bp				1.11	1.11	104000000	pos53	0			pos	24	12600000	13600000	10300000	14000000	25000000	16600000	11000000	21200000	15700000	31100000	104000000	19300000	19000000	22800000	9912540	28500000	16700000	19800000	17200000	15900000	19600000	14400000	15700000
398.137	15.3926	C15H22N6O5S	1	S-Adenosyl-L-methionine	10	Central	KEGG_Metacyc_HMDB	0.346739	-2.40747	2.0547	nFla'nFlaB'PQC'UI'UIB	S-Adenosyl-L-methionine	0	bp		1.7	x2+xC13xS34xK+	0.07	0.17	102000000	pos54	0		H	posneg	24	73100000	73300000	87500000	88900000	84200000	60000000	65600000	56400000	71800000	63400000	81500000	80500000	70800000	71400000	75100000	70800000	82500000	80200000	102000000	62100000	56100000	58000000	81500000
731.546	4.14896	C40H78NO8P	42	PC(32:1)	8	Central	KEGG_Lipidmaps_HMDB	-0.482404	3.59027	-0.4897	nFla'nFlaB'PQC'UI'UIB	PC(32:1)	0	bp		1.4	xC13	0.15	0.15	97700000	pos57	0		H	pos	24	72500000	82400000	81600000	73300000	86500000	74900000	68100000	81600000	79700000	81200000	86700000	83500000	72900000	74400000	57300000	68900000	85500000	97700000	86300000	76600000	78900000	70100000	81800000
331.555	13.5153										nFla'nFlaB'PQC'UI'UIB		0	bp		C6	x2-merxC13xC13	0.13	0.13	95700000	pos58	0			pos	24	51500000	46300000	50200000	48500000	52400000	66000000	55700000	63200000	59900000	63900000	85300000	69700000	68600000	77100000	61100000	79800000	89700000	95700000	76300000	69200000	72700000	70300000	60600000
217.131	8.8657	C10H19NO4	1	O-Propanoylcarnitine	7	0	KEGG_Lipidmaps_HMDB	-0.0515788	30.1183	-0.0409754	nFla'nFlaB'PQC'UI'UIB	O-Propanoylcarnitine	0	bp		-0.2	xC13	0.05	0.11	91200000	pos59	0		H	pos	24	66000000	67300000	76400000	77500000	75000000	87600000	73300000	77700000	91200000	80600000	51800000	54800000	58300000	54800000	52300000	29900000	32100000	37800000	37000000	31500000	30700000	28000000	35100000
812.678	5.06763	C47H93N2O6P	2	SM(d18:1/24:1(15Z))	7	0	KEGG_Lipidmaps_HMDB	0.680096	21.0677		nFla'nFlaB'PQC'UI'UIB	SM(d18:1/24:1(15Z))	0	bp				0.41	0.41	90200000	pos56	0		H	pos	24	48600000	55700000	53700000	56000000	53200000	53900000	45100000	54800000	62200000	52300000	90200000	48700000	42400000	44600000	35800000	64700000	48500000	54600000	64500000	56100000	54200000	51200000	51000000
147.053	14.616	C5H9NO4	13	L-Glutamate	10	Central	KEGG_Metacyc_HMDB	-0.0177694	1.31557	0.00382938	nFla'nFlaB'PQC'UI'UIB	L-Glutamate	0	bp		0.1	xC13xO18x-H2OxN15x-CO2xK+	0.35	0.37	89700000	neg4	0		H	neg	24	27500000	27800000	27700000	30200000	38200000	49400000	24300000	45100000	45200000	51100000	89700000	77100000	51200000	61900000	34000000	64800000	65100000	84300000	60800000	60100000	78500000	38000000	40200000
261.084	10.0333	C10H15NO7	2	Hymexazol O-glucoside	7	0	KEGG	-2.777	23.4163	1.4344	nFla'nFlaB'PQC'UI'UIB	Hymexazol O-glucoside	0	bp				0.53	0.53	87100000	pos61	0		H	pos	24	84600000	73900000	77200000	78400000	79700000	80200000	75300000	71300000	87100000	81300000	3871081	81900000	75700000	80200000	77600000	85600000	78300000	81700000	72900000	75600000	78400000	84200000	81100000
141.019	15.3795	C2H8NO4P	2	Ethanolamine phosphate	10	Central	KEGG_Metacyc_HMDB	0.336109	-0.69295	0.406458	nFla'nFlaB'PQC'UI'UIB	Ethanolamine phosphate	0	bp		0	xO18xK+x2-merxC13x3-merxNa+	0.43	0.43	86700000	pos62	0		H	posneg	24	27500000	24900000	34200000	22900000	28300000	42900000	38000000	32800000	39800000	39700000	86700000	44600000	36800000	37800000	40500000	28300000	42000000	47000000	34800000	39200000	51000000	47200000	40900000
117.079	10.6227	C5H11NO2	17	Betaine	10	Central	KEGG_Metacyc_HMDB	0.0132821	0.23321	0.0455267	nFla'nFlaB'PQC'UI'UIB	Betaine	0	bp		1.2	xC13	0.19	0.19	84400000	pos60	0		H	pos	24	68800000	52500000	47600000	68700000	60400000	59900000	49400000	59300000	48400000	60300000	73400000	54400000	58100000	59300000	43100000	61000000	57600000	59400000	84400000	48300000	62100000	54200000	59300000
812.678	7.03289	C47H93N2O6P	2	SM(d18:1/24:1(15Z))	7	0	KEGG_Lipidmaps_HMDB	0.935549	43.1244		nFla'nFlaB'PQC'UI'UIB	SM(d18:1/24:1(15Z))	0	bp				0.51	0.51	83100000	pos55	0		H	pos	24	26800000	59400000	37000000	31000000	75200000	24000000	17700000	29000000	36600000	41300000	83100000	46500000	32800000	32500000	27000000	26600000	33500000	41600000	58800000	22700000	27000000	20100000	27300000
127.946	28.2926										nFla'nFlaB'PQC		0	bp				0.18	0.83	83000000	pos63	0			pos	24	12100000	20300000	28800000	53400000	18700000	13400000	21600000	22600000	47100000	14800000	41500000	38400000	34700000	27100000	29100000	32700000	19000000	16400000	83000000	35800000	15300000	12800000	81000000
133.038	14.9118	C4H7NO4	4	L-Aspartate	10	Central	KEGG_Metacyc_HMDB	-0.0121603	0.48389	0.0119146	nFla'nFlaB'PQC'UI'UIB	L-Aspartate	0	bp		0.2	xK+x-H2OxC13x-FA	0.65	0.65	81500000	pos64	0		H	posneg	24	31200000	30400000	32600000	21800000	34300000	34700000	29300000	30200000	24400000	35900000	81500000	32500000	24500000	26200000	25000000	18600000	25400000	29100000	18100000	21800000	35400000	27100000	18200000
122.048	7.18627	C6H6N2O	4	Picolinamide	7	0	KEGG	0.0632394	11.0465		nFla'nFlaB'PQC'UI'UIB	Picolinamide	0	bp		-0.3	xC13	0.16	0.18	81400000	pos48	0		H	posneg	24	33500000	39300000	43500000	44000000	37300000	43900000	32300000	51000000	39500000	36000000	69700000	54200000	54200000	53300000	44800000	64000000	61300000	81400000	74300000	46600000	52200000	45100000	56900000
758.261	10.5441				0.1						nFla'nFlaB'PQC'UI'UIB		0	bp	xNa+	C33	xC13xNa+	0.61	0.61	81100000	pos65	0			posneg	24	46900000	46700000	43000000	40900000	70200000	52400000	39800000	70100000	50700000	81100000	1.29868e+06	71000000	73900000	75800000	40100000	60900000	61300000	77800000	48200000	47300000	63500000	43800000	41200000
127.946	27.2922				0.2						nFla'nFlaB'PQC'UI		0	bp				0.18	0.82	78300000	pos66	0			pos	24	10900000	20800000	27600000	49600000	19300000	14500000	20200000	21400000	43700000	14100000	44700000	38100000	35700000	32300000	27800000	31300000	17400000	15800000	74300000	36200000	12500000	14800000	78300000
211.088	27.2038										nFla'nFlaB'PQC'UI'UIB		0	bp				0.03	0.12	78200000	pos67	0			pos	24	71400000	68700000	60500000	62500000	70700000	73000000	77100000	69100000	63600000	71500000	67700000	62500000	63600000	63700000	62500000	73000000	70700000	71900000	58000000	65600000	71200000	78200000	56200000
211.088	26.3788										nFla'nFlaB'PQC'UI'UIB		0	bp				0.04	0.09	78200000	pos68	0			pos	24	61900000	65000000	65100000	66400000	64800000	74000000	77100000	69100000	71800000	71500000	67700000	67300000	63600000	66600000	62500000	73000000	70700000	71900000	69000000	65600000	71200000	78200000	62700000
131.059	13.8531							5.1032			nFla'nFlaB'PQC'UI'UIB		0	bp				0.32	0.32	77900000	pos69	0			pos	24	59100000	57500000	37800000	35800000	65000000	51000000	29700000	49900000	36800000	55500000	77900000	50300000	49300000	49800000	31500000	48400000	51500000	63000000	29200000	37300000	45900000	35200000	22900000
174.112	23.0776	C6H14N4O2	2	L-Arginine	10	Central	KEGG_Metacyc_HMDB	-0.263938	-0.844685		nFla'nFlaB'PQC'UI'UIB	L-Arginine	0	bp		-0.4	xO18xNa+xC13x2-merxN15	0.12	0.15	76900000	pos71	0		H	posneg	24	58700000	61700000	75500000	67500000	64000000	49500000	46800000	49200000	64600000	51600000	62700000	59600000	61700000	76900000	58500000	42600000	47000000	49800000	57300000	58300000	62900000	45600000	67500000
134.022	16.316	C4H6O5	4	(S)-Malate	10	Central	KEGG_Metacyc_HMDB	-0.147909	-0.818237	-0.191135	nFla'nFlaB'PQC'UI'UIB	(S)-Malate	0	bp		0.2	xK+xC13x-CO2xO18x-H2O	0.02	0.1	76200000	neg5	0		H	negpos	24	66800000	69700000	74600000	70500000	67800000	76200000	59100000	63000000	72900000	65600000	63000000	62300000	61100000	60200000	61500000	51800000	55800000	63300000	55500000	51000000	50700000	46900000	49800000
211.088	18.5274										nFla'nFlaB'PQC'UI'UIB		0	bp			xNa+	0.02	0.13	73800000	pos73	0			pospos	24	63900000	70500000	67600000	50800000	63400000	63700000	61400000	68200000	53600000	65600000	70000000	69400000	69200000	69100000	66200000	69800000	64500000	68700000	51700000	64300000	64300000	65400000	51500000
200.926	15.1016										nFla'nFlaB'UI'UIB		0	bp				0.58	0.58	73500000	pos74	0			pos	23	60700000	54900000	49300000	42800000	59500000	73500000	60600000	64800000	47600000	67500000	0	54600000	68900000	64600000	53500000	62700000	68500000	67300000	40300000	48800000	58600000	68800000	34200000
837.552	3.35643	C46H80NO10P	16	PS(40:5)	8	Central	0	0.404841	-19.1742	0.416898	nFla'nFlaB'PQC'UI'UIB	PS(40:5)	0	bp		2.5	x-NH3xNa+xC13	0.25	0.25	71800000	pos72	0		H	pos	24	39000000	45800000	39600000	42400000	48200000	46000000	29200000	44300000	43900000	52800000	71800000	47600000	53400000	53800000	35100000	46400000	48200000	48200000	53100000	46700000	53100000	40800000	46500000
117.079	11.8917	C5H11NO2	17	L-Valine	10	Central	KEGG_Metacyc_HMDB	0.154212	-0.139289	0.21044	nFla'nFlaB'PQC'UI'UIB	L-Valine	0	bp		0	xACNxC13	0.52	0.52	70400000	pos70	0		H	posneg	24	19600000	26700000	19500000	24600000	41700000	25300000	15800000	32300000	28000000	32600000	70400000	35300000	34200000	38100000	15200000	37000000	34800000	43800000	40400000	26500000	29800000	20100000	26800000
339.875	11.1112										nFla'nFlaB'UI'UIB		0	bp		C4	xC13	0.65	0.65	67300000	pos77	0			pos	23	62000000	56200000	64600000	55600000	40100000	50500000	67200000	40500000	51900000	32500000	0	42000000	40900000	34300000	67300000	42400000	50000000	43600000	35600000	48600000	45800000	62300000	52400000
757.562	4.21597	C42H80NO8P	56	PC(34:2)	8	Central	Lipidmaps	-0.45274	5.1226	-0.459099	nFla'nFlaB'PQC'UI'UIB	PC(34:2)	0	bp		2.3	xC13	0.28	0.58	64300000	pos75	0		H	pos	24	53700000	60500000	57600000	54400000	64300000	53900000	48600000	55100000	55200000	55900000	57900000	24500000	51400000	51900000	48300000	50600000	60600000	60900000	59100000	20300000	21900000	23000000	57000000
248.992	14.9996				0.1						nFla'nFlaB'PQC'UI'UIB		0	bp	xK+		xK+x2-merx-H2O	0.55	0.55	63900000	pos79	0			pos	24	53600000	51000000	61300000	39900000	54500000	63900000	59200000	51600000	44800000	55600000	546256	56800000	56600000	55300000	52500000	59800000	52500000	61000000	28700000	44400000	51300000	54400000	36700000
277.116	11.9962							-3.35024			nFla'nFlaB'PQC'UI'UIB		0	bp		C11	xC13xNa+x-FAxO18x-H2O	0.48	0.48	63300000	pos80	0			posneg	24	18900000	22900000	16400000	25700000	34800000	32200000	17300000	32800000	20000000	39100000	63300000	37900000	34000000	37400000	13500000	38400000	32600000	45200000	39300000	17600000	32400000	23400000	31300000
195.954	15.8049										nFla'nFlaB'PQC'UI'UIB		0	bp			x2+x2-merxO18x3-merx-H2OxNa+	0.12	0.36	62700000	neg7	0			neg	24	55000000	40200000	39100000	27200000	45400000	38600000	43800000	37700000	28800000	55300000	62700000	50600000	46300000	49000000	50700000	29400000	61400000	45300000	30900000	30400000	57700000	45600000	25800000
297.09	7.1801	C11H15N5O3S	2	5'-methylthioformycin	7	0	Metacyc	0.790046	1.48054	0.848789	nFla'nFlaB'PQC'UI'UIB	5'-methylthioformycin	0	bp		0.5	xC13	0.16	0.27	62100000	pos78	0		H	posneg	24	49500000	54200000	54500000	57000000	51400000	39600000	24800000	43800000	40400000	37600000	54500000	43600000	46400000	41200000	35700000	36700000	35400000	49700000	62100000	40000000	41000000	27000000	39800000
122.048	6.81495	C6H6N2O	4	Nicotinamide	10	Central	KEGG_Metacyc_HMDB	-0.0375402	3.79704		nFla'nFlaB'PQC'UI'UIB	Nicotinamide	0	bp		-1.4	xC13	0.74	0.74	61300000	pos81	0		H	pos	24	11000000	13000000	8587793	8854125	18500000	10200000	11900000	29400000	39500000	17200000	22000000	15300000	4442059	24000000	51000000	24800000	61300000	18000000	22200000	9726798	18900000	9804504	15300000
388.027	10.2627				0.2						nFla'nFlaB'UI'UIB		0	bp		C12	xNa+xC13	0.57	0.57	60000000	pos82	0			pos	23	60000000	50200000	56600000	53500000	48900000	49300000	53000000	48100000	51000000	47800000	0	48000000	45300000	48400000	56700000	49300000	54600000	49900000	46200000	48800000	47200000	54000000	52500000
167.939	9.28041										nFla'nFlaB'UI'UIB		0	bp				0.57	0.57	58700000	pos84	0			pos	23	53900000	51900000	55700000	54200000	48900000	53600000	58700000	48100000	52700000	48300000	0	49000000	50200000	45900000	56600000	49800000	54400000	51700000	49600000	53200000	48600000	57500000	53100000
158.142	9.11452	C8H15NO	9	Pseudotropine	7	0	KEGG_Metacyc	0.0500208	-7.84619		nFla'nFlaB'PQC'UI'UIB	Pseudotropine	0	bp				0.08	0.17	58400000	pos83	0		NH3	pos	24	29800000	33000000	33000000	31300000	33600000	26700000	27900000	31100000	34100000	29900000	42800000	43200000	40300000	43300000	36000000	40300000	58400000	47000000	51300000	39300000	38700000	25800000	39900000
137.048	11.0207		0		#N/A			0.207052	#N/A		nFla'nFlaB'PQC'UI'UIB	Anthranilate	0	bp		0.4	xC13	0.26	0.64	58400000	pos85	0		H	pos	24	17700000	9384370	3.50247e+06	23800000	15700000	13400000	25100000	46800000	35200000	25500000	38700000	24900000	28200000	27800000	19100000	36500000	12100000	12200000	34700000	58400000	11100000	43200000	19700000
175.048	14.7663		0		0.4			-0.246058	#N/A	-0.310533	nFla'nFlaB'UI'UIB	N-Acetyl-L-aspartate	0	bp		-0.2	x-H2OxN15x-CO2xO18xC13xK+	0.9	0.9	58200000	neg8	0		H	negpos	24	4.05699e+06	5.45583e+06	7.60428e+06	8589950	6159374	6.86235e+06	3.87077e+06	8.32659e+06	14800000	7.05438e+06	58200000	21200000	11300000	14100000	8590148	12300000	8545547	14200000	16600000	18300000	17000000	5917369	15200000
130.027	15.3569	C5H6O4	7	Itaconate	10	Central	KEGG_Metacyc_Lipidmaps_HMDB	0.183138	0.213497	0.31912	nFla'nFlaB'PQC'UI'UIB	Itaconate	0	bp		0.1	xK+xO18x-CO2xC13	0.07	0.18	57700000	neg10	0		H	neg	24	46000000	50200000	57700000	47300000	56300000	43100000	38500000	40900000	42300000	38400000	24800000	27200000	27500000	26000000	29700000	3.51449e+06	4.82504e+06	4.85552e+06	3595778	3.77508e+06	4.34181e+06	4.05805e+06	3.53208e+06
221.022	14.3348		0		0.1			-0.35682	#N/A		nFla'nFlaB'UI'UIB	p-chlorophenylalanine	0	bp	xK+	-4	xC13	0.6	0.6	57600000	pos86	0		Na	pos	23	25700000	24400000	35200000	28600000	26400000	44700000	54700000	36400000	48900000	34200000	0	29900000	37800000	33700000	47200000	28900000	40200000	38500000	29000000	30400000	25800000	57600000	50300000
211.088	15.9092										nFla'nFlaB'PQC'UI'UIB		0	bp				0.45	0.45	57200000	pos87	0			pospos	24	35500000	35400000	39900000	42800000	35100000	39200000	40200000	38900000	38900000	36300000	57200000	27500000	21900000	22400000	34300000	29500000	25700000	31400000	19300000	38200000	38500000	43800000	46200000
273.903	5.83876										nFla'nFlaB'UI'UIB		0	bp				0.59	0.59	57000000	pos88	0			pos	23	45700000	43500000	54400000	46200000	38300000	43700000	57000000	37200000	43900000	33400000	0	39600000	36700000	35300000	51600000	40900000	46900000	41200000	33800000	41600000	36300000	50200000	46400000
705.531	3.71634	C38H76NO8P	36	PC(30:0)	8	Central	Lipidmaps	-0.466669	-7.63282	-0.473853	nFla'nFlaB'PQC'UI'UIB	PC(30:0)	0	bp		1.6	xACNxC13	0.06	0.1	55600000	pos90	0		H	pos	24	46000000	47300000	45800000	40200000	48800000	42600000	39300000	43600000	43200000	46000000	55600000	50400000	51800000	55200000	48000000	43300000	47800000	45700000	48700000	40600000	47300000	38100000	42500000
495.333	7.11949	C24H50NO7P	10	LysoPC(16:0)	8	Central	KEGG_Lipidmaps_HMDB	0.767085	43.8162	0.882987	nFla'nFlaB'PQC'UIB	LysoPC(16:0)	0	bp		2.1	xC13xNa+	0.75	0.93	54800000	pos89	0		H	pos	24	9872082	6.44258e+06	5.84287e+06	11600000	11500000	14800000	8.06434e+06	9215699	3.63082e+06	6889360	54800000	22600000	18100000	15300000	9213390	3.51216e+06	4727452	3.87895e+06	17900000	10200000	19000000	7.44236e+06	17600000
121.074	15.1486		0		#N/A			0.187813	#N/A	0.15127	nFlaB'PQC'UI'UIB	Tromethamine	0	bp		0.5	xC13	0.26	1.34	53700000	pos92	0		H	pos	24	7.00528e+06	8737397	4.60295e+06	5.05473e+06	53700000	6.35305e+06	16100000	20000000	11400000	6.14279e+06	15600000	10400000	8862543	9136775	9308466	4.55065e+06	3.60799e+06	4320252	3.78273e+06	6999096	3.30588e+06	12500000	3225619
175.868	15.1902										nFla'nFlaB'UI'UIB		0	bp			xC13	0.65	0.65	52900000	pos94	0			pos	23	52900000	38800000	18900000	20600000	43800000	39300000	26300000	39500000	17700000	41900000	0	23400000	39000000	35500000	20400000	31000000	38700000	33200000	18000000	21600000	19300000	52900000	10400000
314.136	14.1988	C14H20N4O3	1	4-coumaroyl-3-hydroxyagmatine	7	0	Metacyc	0.734932	35.7762		nFla'nFlaB'PQC'UI'UIB	4-coumaroyl-3-hydroxyagmatine	0	bp		-4.4	xC13	0.34	0.71	51000000	pos95	0		Na	pos	24	13300000	9638175	5.85154e+06	5.27568e+06	15700000	51000000	9658632	31200000	28600000	49200000	26700000	22800000	20100000	22800000	8731557	15500000	27400000	48700000	8.10818e+06	18100000	48400000	31300000	6520999
836.675	7.30172		0		0.1			0.79864	#N/A		nFla'nFlaB'PQC'UI'UIB	SM(d18:0/24:1(15Z))	0	bp	xNa+	0.2	xC13xNa+	0.57	0.57	50900000	pos96	0		Na	pos	24	48200000	48300000	48600000	38400000	45300000	49900000	45200000	43700000	48300000	44500000	1.93066e+06	50900000	31300000	41600000	47900000	49700000	38300000	49400000	40900000	44200000	47300000	48600000	46400000
103.1	19.6318	C5H13NO	1	Choline	10	Central	KEGG_Metacyc_HMDB	0.136777	-2.74871	0.0825071	PQC'UI	Choline	0	bp				0.26	1.34	50800000	pos97	0		H	pos	24	28800000	3844296	3.25418e+06	1.95746e+06	7931213	39500000	9866477	5713269	3.27627e+06	23400000	2.6275e+06	2846867	3.22083e+06	3.63795e+06	4.90306e+06	2.86294e+06	9686837	10600000	1.85779e+06	2.84111e+06	16800000	50800000	2.29802e+06
337.335	3.72784										nFla'nFlaB'PQC'UI'UIB		0	bp		C25	xC13	0.17	0.52	50400000	pos98	0			posneg	24	50400000	27400000	43600000	35500000	22600000	41100000	16600000	12700000	15600000	31600000	40000000	36800000	30200000	31600000	26000000	18500000	32600000	22100000	14800000	25600000	34300000	18500000	29600000
421.099	13.0012										nFla'nFlaB'PQC'UI'UIB		0	bp		C16	xC13	0.61	0.61	49900000	pos99	0			pos	24	36700000	38800000	35300000	36400000	49900000	39300000	28500000	37900000	38500000	40900000	1.61818e+06	36300000	46100000	42100000	22500000	38200000	45200000	40900000	32500000	25600000	26400000	37300000	40300000
405.125	12.9636	C14H25NO11	8	N-Acetyllactosamine	7	0	KEGG_Metacyc_HMDB	0.330836	3.41394		nFla'nFlaB'PQC'UI'UIB	N-Acetyllactosamine	0	bp		0.3	xO18xC13	0.36	0.36	48500000	pos100	0		Na	posneg	24	28900000	29300000	17100000	19700000	31800000	30800000	13800000	33100000	31900000	33900000	48500000	40000000	26000000	29800000	18300000	28900000	28400000	34600000	35000000	36400000	40700000	21700000	23000000
211.088	21.9282										nFla'nFlaB'PQC'UI'UIB		0	bp				0.06	0.06	47600000	pos101	0			pos	24	42700000	46100000	42700000	44700000	45200000	44200000	40000000	40500000	42800000	40300000	44000000	42600000	42600000	47600000	41300000	39600000	39600000	41900000	42000000	42500000	39700000	42900000	43400000
400.151	13.2573		0		#N/A			-2.07988	#N/A	2.3686	nFla'nFlaB'PQC'UI'UIB	Dihydroanhydropodorhizol	0	bp		-8	xNa+xC13xK+	0.3	0.3	47500000	pos102	0		H	posneg	24	23300000	28300000	23800000	21500000	33200000	28500000	22400000	30200000	28600000	30400000	47500000	30500000	28800000	29900000	21600000	28800000	28400000	34100000	26700000	26900000	28300000	26200000	23100000
347.063	13.3737	C10H14N5O7P	7	AMP	10	Central	KEGG_Metacyc_HMDB	-0.601753	0.269538	-0.623707	nFla'nFlaB'PQC'UI'UIB	AMP	0	bp		0.9	xNa+xK+xC13	0.05	0.2	45400000	pos104	0		H	pos	24	34000000	45100000	41100000	36100000	45400000	37600000	36400000	35700000	34200000	37300000	37500000	35600000	34500000	35900000	32600000	24900000	26200000	27900000	27500000	30500000	43000000	25500000	34300000
813.683	4.88879	C51H88O6	25	TG(48:5)	8	Central	0	-2.40369	18.1802		nFla'nFlaB'PQC'UI'UIB	TG(48:5)	0	bp				0.41	0.41	45400000	pos103	0		NH3	pos	24	24500000	24900000	24900000	23900000	27900000	29300000	23500000	28100000	32100000	27600000	45400000	24200000	21700000	24200000	17700000	35800000	26600000	32200000	33300000	28700000	28400000	22800000	27800000
254.094	12.7486							-3.02578			nFla'nFlaB'PQC'UI'UIB		0	bp		C9	x-H2OxC13xK+	0.17	0.21	45300000	pos105	0			pospos	24	37300000	30000000	33200000	28800000	43700000	45300000	37500000	32200000	25500000	39000000	43900000	38000000	35400000	35400000	27000000	35400000	31000000	43400000	37100000	31900000	28600000	33000000	23000000
813.681	7.15907										nFla'nFlaB'PQC'UI'UIB		0	bp				0.51	0.51	44200000	pos93	0			pos	24	13700000	30600000	19200000	16200000	38600000	11700000	8564718	15100000	21700000	22100000	44200000	23300000	17200000	18600000	14400000	13700000	17900000	18700000	33000000	11800000	13600000	10400000	15300000
500.177	10.2195		0		0.2			1.35181	#N/A	-1.58064	nFla'nFlaB'PQC'UI'UIB	Cys-Leu-Cys-Tyr	0	bp				0.49	0.49	44000000	pos108	0		H	pos	24	39600000	36900000	34900000	34900000	41500000	43700000	41900000	40400000	37800000	44000000	3218465	32400000	28800000	30900000	26200000	42700000	40800000	39900000	36900000	39500000	42600000	36000000	38000000
708.928	16.0598										nFla'nFlaB'PQC'UI'UIB		0	bp				0.44	0.54	43900000	pos109	0			pos	24	22700000	31900000	39300000	26200000	21500000	22700000	11300000	18600000	43900000	22200000	5.87611e+06	26500000	26300000	28400000	34000000	10100000	15600000	20500000	35900000	31100000	23200000	16100000	40400000
134.094	4.25131										nFla'nFlaB'PQC'UI'UIB		0	bp		C6	xNH3xNa+xC13	0.04	0.77	42800000	pos110	0			pos	24	29200000	12200000	9304848	34200000	17600000	6.7071e+06	9480013	5.08254e+06	12100000	23900000	23600000	24400000	24700000	23300000	22600000	31800000	42800000	6136483	10100000	36400000	41800000	19500000	6173004
273.903	1.61818				0.2						nFla'nFlaB'UI'UIB		0	bp				0.88	0.88	42000000	pos111	0			pos	24	27500000	26300000	41500000	28900000	16400000	20000000	42000000	12700000	24500000	10600000	203476	16900000	14800000	11400000	40300000	18600000	25500000	19400000	10600000	17800000	10100000	34300000	26500000
401.875	10.9704										nFla'nFlaB'PQC'UI'UIB		0	bp		C5	xO18xC13xC13	0.68	0.68	42000000	neg11	0			neg	24	35700000	33500000	39400000	32900000	24100000	28900000	39400000	22800000	31600000	17500000	13041.1	25400000	23500000	19800000	42000000	24500000	30300000	26300000	21000000	30000000	25600000	35300000	31800000
111.888	14.7376										nFla'nFlaB'UI'UIB		0	bp			xCl37	0.62	0.62	41700000	pos112	0			pos	23	28200000	32600000	39100000	33000000	27000000	23700000	41700000	24500000	26800000	20700000	0	21300000	33800000	28800000	38400000	28000000	27300000	22900000	26400000	22200000	12800000	32000000	29600000
297.09	6.67407	C11H15N5O3S	2	5'-methylthioformycin	7	0	Metacyc	0.738883	-5.98925	0.794515	nFla'PQC'UIB	5'-methylthioformycin	0	bp				0.74	1.56	41000000	pos113	0		H	pospos	24	2.31235e+06	4.0952e+06	2048596	3.53079e+06	4719151	39600000	1.84973e+06	3.93043e+06	2.07553e+06	4.94269e+06	3.72659e+06	2007431	821314	2820343	7.38084e+06	2219110	35400000	2.57666e+06	3.62135e+06	40000000	41000000	27000000	39800000
167.939	2.87894										nFla'nFlaB'PQC'UI'UIB		0	bp				0.67	0.67	40700000	pos114	0			pos	24	29600000	29500000	38800000	30200000	22500000	27600000	38200000	19000000	27600000	19600000	340961	24200000	22300000	19600000	40700000	25000000	31000000	26400000	18900000	26400000	18900000	35200000	29100000
345.04	14.2283				0.1						nFla'nFlaB'PQC'UI'UIB		0	bp	xK+	C12	xK+xC13	0.57	0.57	39900000	pos115	0			posneg	24	30800000	35100000	39900000	37200000	30500000	15000000	18900000	13100000	16300000	13300000	306788	17700000	20800000	18500000	24300000	17900000	16600000	13900000	15700000	13500000	13000000	15000000	17800000
158.142	10.0654	C8H15NO	9	Pseudotropine	7	0	KEGG_Metacyc	0.167655	2.34202		nFla'nFlaB'PQC'UI'UIB	Pseudotropine	0	bp				0.1	0.21	38600000	pos116	0		NH3	pos	24	25300000	23400000	20500000	19400000	25000000	21500000	18400000	22400000	19000000	26900000	35100000	28600000	30500000	32300000	27600000	27200000	38600000	31200000	29200000	22600000	31700000	19400000	22300000
149.105	9.0781	C6H12O3	16	FA hydroxy(6:0)	8	Central	Lipidmaps_HMDB	0.0531185	19.5716		nFla'nFlaB'PQC'UI'UIB	FA hydroxy(6:0)	0	bp		0.7	xC13	0.05	0.28	36900000	pos118	0		NH3	pos	24	24600000	17900000	14900000	20600000	29600000	18800000	29800000	31800000	32300000	23800000	27600000	26300000	27600000	25500000	24500000	33600000	21500000	20400000	33700000	36900000	20000000	35400000	22900000
401.875	9.24439										nFla'nFlaB'PQC'UI'UIB		0	bp				0.58	0.58	36300000	neg14	0			negneg	24	31300000	29700000	34500000	30700000	27200000	28800000	36300000	26700000	30200000	25300000	3819.7	26600000	25700000	24900000	34400000	27600000	28700000	28300000	25000000	29400000	24700000	33000000	30800000
122.048	6.41028	C6H6N2O	4	Nicotinamide	10	Central	KEGG_Metacyc_HMDB	-0.0350822	-2.36639		nFla'nFlaB'PQC'UI'UIB	Nicotinamide	0	bp				0.46	0.56	35600000	pos119	0		H	pos	24	23100000	17800000	9549011	12300000	11900000	9892637	9160248	22700000	17700000	19800000	17500000	17700000	4.13678e+06	12600000	9997702	24800000	7.22173e+06	18000000	35600000	9726798	18900000	11300000	15300000
194.115	5.52304										nFla'PQC'UIB		0	bp				0.47	1.35	35400000	pos121	0			pospos	24	4.31744e+06	10200000	5.89045e+06	6.38414e+06	6.31152e+06	2.46513e+06	3.98012e+06	3959538	32500000	4802408	1.67925e+06	2.79234e+06	2.34834e+06	4.38751e+06	1.38691e+06	6128203	5.28726e+06	8866945	35400000	10400000	2.53634e+06	5.4436e+06	4.33006e+06
194.115	5.10959										nFla'nFlaB'PQC'UI'UIB		0	bp		C8	xNa+xC13xNH3	0.12	0.63	35400000	pos120	0			pospos	24	11800000	10200000	9829692	8838077	6.79183e+06	8.31433e+06	10300000	12400000	32500000	13800000	9226667	9407404	8079185	8635998	6.83033e+06	12100000	32800000	18500000	35400000	19500000	7.97379e+06	17900000	13000000
679.473	3.46989										nFla'nFlaB'PQC'UI'UIB		0	bp		C46	x-NH3xC13	0.08	0.12	34700000	pos122	0			pos	24	24100000	26200000	25300000	31400000	25300000	26200000	33300000	31000000	32800000	25700000	28100000	31700000	31200000	29300000	25700000	34200000	25700000	28000000	28500000	30700000	25300000	28100000	34700000
495.333	4.24406	C24H50NO7P	10	LysoPC(16:0)	8	Central	KEGG_Lipidmaps_HMDB	0.729535	5.75052	0.843692	nFla'nFlaB'PQC'UI'UIB	LysoPC(16:0)	0	bp		2.5	xC13xNa+	0.38	0.38	34300000	pos117	0		H	pos	24	14300000	16200000	11900000	13600000	15500000	18400000	13400000	17300000	17400000	19000000	34300000	17600000	17500000	20200000	13800000	19800000	13100000	14200000	19700000	18600000	22100000	16100000	18800000
149.105	8.44274	C6H12O3	16	FA hydroxy(6:0)	8	Central	Lipidmaps_HMDB	0.0569041	13.5189		nFla'nFlaB'PQC'UI'UIB	FA hydroxy(6:0)	0	bp		0	xC13	0.08	0.33	34300000	pos123	0		NH3	pos	24	16900000	14900000	11000000	15400000	20900000	14000000	23300000	26700000	27300000	19600000	19900000	21800000	22100000	24800000	20800000	26200000	16400000	14400000	26600000	34300000	17100000	29900000	20000000
192.027	18.639	C6H8O7	12	Citrate	8	Central	KEGG_Metacyc_HMDB	-0.0601549	-19.1578	-0.0585623	nFla'nFlaB'PQC'UI'UIB	Citrate	0	bp		0.2	x-H2OxC13xO18xNa+	0.06	0.27	33600000	neg15	0		H	negpos	24	18800000	15000000	14700000	10600000	16800000	20800000	16400000	17800000	16300000	24000000	22300000	24000000	25100000	25800000	25000000	17400000	31600000	28700000	21100000	20400000	33600000	24800000	20100000
165.079	9.49897	C9H11NO2	7	L-Phenylalanine	10	Central	KEGG_Metacyc_HMDB	0.219156	0.297528	0.264623	nFla'nFlaB'UI'UIB	L-Phenylalanine	0	bp		0.3	x-FAxC13	0.8	0.8	32900000	pos106	0		H	posneg	24	6.55384e+06	6.98263e+06	6385491	5.69966e+06	9223700	6651423	3699203	7181180	7901064	8302257	32900000	10100000	7741016	10400000	6.85964e+06	8545740	7272814	10400000	9470722	7.30301e+06	8803029	5.20475e+06	8510167
206.152	4.10389										nFla'nFlaB'PQC'UI'UIB		0	bp		C11	xNH3xNa+xC13	0.11	0.5	32700000	pos125	0			pospos	24	25600000	16900000	9919531	10600000	23900000	23500000	32700000	9455787	10800000	20100000	6.43027e+06	6.83308e+06	7710823	8366784	6850116	28500000	18100000	19400000	16100000	26300000	6.38621e+06	17100000	15900000
312.176	3.51754										nFla'nFlaB'PQC'UI'UIB		0	bp		C18	xC13	0.08	0.55	31300000	neg16	0			neg	24	26800000	17800000	29800000	8761964	31300000	9385344	26400000	5711092	13800000	17400000	21300000	19000000	18300000	18400000	17000000	12000000	13900000	11000000	10300000	8920252	16100000	7621709	13500000
229.939	8.49678										nFla'nFlaB'PQC'UI'UIB		0	bp				0.57	0.57	31100000	neg17	0			neg	24	26100000	25900000	29400000	25900000	25800000	24500000	30900000	23400000	26300000	23400000	16989.3	25800000	25900000	23900000	31100000	27000000	27800000	25900000	24200000	25800000	25200000	29600000	27800000
111.888	14.2292				0.4						nFla'UI'UIB		0	bp				1.48	1.54	30900000	pos127	0			pos	23	9187091	7861303	26700000	9779892	5452142	2.6474e+06	30900000	2436713	1.87809e+06	3268682	0	2.4358e+06	5247267	3886750	30000000	3697494	6.77198e+06	3.97653e+06	2.81987e+06	2.45398e+06	1.66655e+06	13200000	9677724
216.098	5.0322				0.2						nFla'nFlaB'PQC'UI'UIB		0	bp	xNa+			0.5	0.78	30800000	pos128	0			pospos	24	13400000	11100000	15700000	8911034	9077751	7151755	13500000	8.32525e+06	30800000	5918732	1083763	5826713	5.6868e+06	4685683	8.05669e+06	7644121	23600000	13000000	12600000	16100000	5.33139e+06	22000000	13400000
216.098	5.62333										nFla'PQC'UI		0	bp				0.47	1.34	30800000	pos130	0			pos	24	8976277	11100000	11700000	8911034	4917167	2.49684e+06	5669198	2779856	30800000	3.7436e+06	528732	2374340	1.68444e+06	2946282	2.27638e+06	6134586	5.76999e+06	6294746	21800000	16100000	1.85618e+06	2.89776e+06	5.55616e+06
401.875	8.10892										nFla'nFlaB'UI'UIB		0	bp				0.61	0.61	30800000	neg18	0			neg	23	25600000	25200000	29700000	25500000	21900000	22900000	30600000	20400000	25000000	18400000	0	21800000	20900000	19400000	30800000	18700000	23300000	17900000	18900000	19300000	19000000	23800000	20200000
229.088	14.4118	C9H15N3O2S	2	Ergothioneine	8	Central	KEGG_HMDB	-0.0874065	41.6654		nFla'nFlaB'PQC'UI'UIB	Ergothioneine	0	bp		-0.8	xS34xC13xK+x-CO2	0.33	0.33	30600000	pos131	0		H	pos	24	17700000	16600000	11900000	16900000	20800000	18400000	9747384	18900000	17000000	19100000	30600000	24000000	19600000	21300000	11200000	20400000	21000000	25100000	19800000	17300000	25700000	14300000	14500000
289.127	13.1432	C11H19N3O6	4	Ophthalmicacid	9	0	HMDB	0.372506	1.21069		nFla'nFlaB'PQC'UI'UIB	Ophthalmicacid	0	bp		-0.4	xNa+xC13xO18xK+	0.36	0.36	30500000	pos133	0		H	posneg	24	14200000	15400000	16700000	14700000	17800000	16800000	12000000	16300000	18600000	16100000	30500000	18400000	16500000	17000000	12500000	16300000	15700000	21600000	16800000	13500000	13200000	11700000	12400000
133.02	8.38376		0		#N/A			-0.382329	#N/A		nFla'nFlaB'PQC'UI'UIB	L-thiazolidine-4-carboxylate	0	bp				0.75	0.75	30500000	pos132	0		H	posneg	24	9810419	7.92787e+06	6.66111e+06	5198983	9734699	6229553	4.07408e+06	6135666	10000000	10500000	30500000	10700000	4.00783e+06	13900000	8471942	6934854	4399187	6624828	7.59912e+06	7550434	15700000	4670708	7.81413e+06
729.528	3.78314		0		0.2			-0.946016	#N/A		nFla'nFlaB'PQC'UI'UIB	PS(32:4)	0	bp				0.45	0.45	29100000	pos136	0		Na	pos	24	22600000	23400000	23700000	17900000	24100000	22500000	21100000	22400000	22000000	23100000	12400000	12000000	26200000	29100000	13000000	17600000	28300000	22700000	23300000	20000000	23900000	18200000	19000000
614.397	7.87212		0		0.4			0.429616	#N/A	-0.644608	nFla'nFlaB'UI'UIB	CHAPS	0	bp		0	xNa+xC13	0.93	0.93	28900000	pos134	0		H	posneg	24	6.04615e+06	5.82266e+06	5031784	6015215	7292629	7.10091e+06	5298477	7676582	6.0073e+06	7884131	28900000	7127024	5769781	8.01544e+06	4728408	9057194	4.67733e+06	7271391	7.29317e+06	7072770	7.4971e+06	5.61235e+06	6546854
154.047	11.1471	C3H8N4O2	1	Methylenediurea	7	0	KEGG_Metacyc	-0.403818	-10.1319		nFla'PQC'UI	Methylenediurea	0	bp				0.54	1.23	28700000	pos137	0		Na	pos	24	2465025	3.91072e+06	2.53313e+06	6.04047e+06	6672179	3.77168e+06	6342529	28700000	9123988	5.05028e+06	489824	5621420	3826266	4076315	3.34091e+06	3.43465e+06	2.88724e+06	2.10728e+06	3.6871e+06	3.8204e+06	25400000	4.93734e+06	3347958
279.085	13.6401		0		0.1			-0.402986	#N/A		nFla'nFlaB'PQC'UI'UIB	sn-glycero-3-Phosphocholine	0	bp	xNa+	0.6	xC13	0.23	0.23	28500000	pos138	0		Na	pos	24	25800000	26300000	20000000	20900000	23900000	28500000	18400000	25700000	26400000	23200000	11100000	21800000	17900000	17900000	19300000	22200000	21400000	23200000	15600000	24200000	28300000	22100000	18100000
178.975	15.3782		0		0.1			-0.256582	#N/A		nFla'nFlaB'PQC'UI'UIB	2-Chloronitrobenzene	0	bp	xK+	-4.2	xK+xC13x2-merx3-merxNa+	0.54	0.54	28400000	pos139	0		Na	pos	24	16900000	13600000	16000000	11500000	16800000	24400000	19100000	19200000	19500000	24800000	653209	22800000	21800000	21800000	20400000	14800000	23300000	24900000	17700000	20400000	28400000	26400000	18600000
309.106	13.3627	C11H19NO9	5	N-Acetylneuraminate	10	Central	KEGG_Metacyc_HMDB	0.787566	1.65047		nFla'nFlaB'PQC'UI'UIB	N-Acetylneuraminate	0	bp		0.3	xNa+xC13x-H2O	0.21	0.21	28300000	pos140	0		H	posneg	24	17600000	20100000	17800000	16500000	23600000	20200000	14900000	19600000	21600000	21600000	28300000	20900000	19800000	20100000	16500000	14000000	15100000	17300000	15800000	19200000	20200000	17100000	18600000
280.088	4.56015										nFla'nFlaB'PQC'UI'UIB		0	bp		C14	xC13	0.48	0.53	28000000	pos135	0			posneg	24	11900000	8.22322e+06	6033424	5356501	10500000	7.21043e+06	7153685	9615039	10800000	14100000	28000000	15300000	9716369	16900000	9195939	8387082	21300000	13600000	19100000	9050687	20200000	6.84291e+06	8583134
282.256	3.58774	C18H34O2	57	FA (18:1)	8	Central	Lipidmaps	-0.192853	-0.398192	-0.21771	nFla'nFlaB'PQC'UI'UIB	FA (18:1)	0	bp		0.1	xC13	0.04	0.33	27900000	neg19	0		H	neg	24	14600000	11100000	10900000	9894671	14600000	13000000	15500000	14700000	17600000	12300000	16600000	15300000	15200000	15100000	15300000	10300000	13000000	11300000	12500000	14400000	27900000	15200000	17700000
506.996	16.2875	C10H16N5O13P3	4	ATP	8	Central	KEGG_Metacyc_HMDB	1.046	0		nFla'nFlaB'PQC'UI'UIB	ATP	0	bp		0.9	xK+xC13xO18xNH3	0.03	0.7	27500000	pos141	0		H	posneg	24	19000000	6.32626e+06	7.02733e+06	7.09122e+06	6.95298e+06	5.91719e+06	5.52058e+06	6043878	7314502	18100000	16300000	15600000	15300000	15000000	15400000	4.92045e+06	18100000	6685437	13100000	8.31856e+06	27500000	7415555	13500000
189.947	9.35246										nFla'nFlaB'PQC'UI'UIB		0	bp				0.57	0.57	27100000	neg20	0			neg	24	25400000	25400000	26400000	25300000	23600000	24000000	26700000	22400000	25100000	19600000	29986	23500000	22700000	22900000	27100000	24400000	24300000	24200000	22600000	24700000	22800000	25800000	25100000
757.562	4.81184	C42H80NO8P	56	PC(34:2)	8	Central	Lipidmaps	-0.789479	16.8718	-0.803579	nFla'nFlaB'PQC'UI'UIB	PC(34:2)	0	bp				0.16	0.17	26400000	pos142	0		H	pos	24	15300000	18500000	16800000	17000000	19400000	15500000	13700000	17200000	15700000	19500000	26400000	20300000	18800000	20500000	18300000	10000000	15100000	12200000	13400000	16100000	17500000	15000000	15900000
275.188	27.5774		0		#N/A			-0.764387	#N/A	-0.80318	nFla'nFlaB'PQC'UI'UIB	Lycoflexine	0	bp		-0.3	xC13x-NH3	0.06	0.12	26200000	pos143	0		H	pos	24	24100000	24400000	21000000	18800000	23500000	24600000	23600000	23600000	20100000	25900000	24700000	21000000	21600000	22400000	23200000	23900000	26200000	24400000	20300000	21000000	26100000	24400000	19300000
401.875	5.82665										nFla'nFlaB'UI'UIB		0	bp				0.66	0.66	26100000	neg21	0			neg	23	19500000	18800000	25300000	19700000	15300000	17200000	26100000	13700000	18100000	11900000	0	15000000	13900000	13000000	24900000	15800000	18500000	16500000	11500000	17000000	12900000	22500000	20200000
369.193	10.1108		0		0.2			-1.52599	#N/A	-1.59125	nFla'nFlaB'UI'UIB	Corydaline	0	bp				0.99	0.99	25600000	pos126	0		H	pospos	24	4632153	3.70656e+06	3.71755e+06	3.92873e+06	5.88819e+06	4.27853e+06	2.0514e+06	4729692	4.95494e+06	6.77412e+06	25600000	5.19413e+06	5.89501e+06	6.65225e+06	3.03493e+06	5670302	6421006	6366560	7238971	5.03108e+06	5.9622e+06	2.95693e+06	4672735
410.009	10.7029										nFla'nFlaB'UI'UIB		0	bp				0.61	0.61	25300000	pos145	0			pos	23	20500000	20000000	22200000	22000000	17900000	18700000	25300000	15700000	18900000	15300000	0	17700000	15200000	16800000	25100000	19400000	19300000	16300000	16700000	18200000	15500000	21400000	19300000
189.947	8.47626										nFla'nFlaB'PQC'UI'UIB		0	bp				0.57	0.57	25100000	neg22	0			neg	24	22100000	21500000	24800000	23500000	20100000	20600000	24400000	19300000	22500000	19500000	29986	21200000	21300000	20300000	25100000	22000000	22600000	21800000	20900000	19600000	18600000	22700000	21500000
767.583	3.68022		0		0.1			0.19255	#N/A		nFla'nFlaB'PQC'UI'UIB	PC(P-36:3)	0	bp	xNa+			0.07	0.39	25100000	pos147	0		H	pospos	24	12300000	20900000	19900000	18200000	13000000	12200000	10400000	9978070	23000000	13400000	25100000	22900000	22400000	22800000	20700000	20300000	11800000	16700000	18400000	12500000	14400000	11600000	11300000
767.592	3.57035										nFla'nFlaB'PQC'UIB		0	bp		C48	xC13	0.07	0.67	25100000	pos146	0			pos	23	23300000	24100000	19900000	20400000	23800000	25000000	18400000	20500000	23000000	25100000	25100000	22900000	22400000	22800000	20700000	0	19100000	20000000	18300000	24200000	23900000	22900000	22300000
173.889	15.7007										nFla'nFlaB'UI'UIB		0	bp			xK+x2-merxNa+	0.61	0.61	25000000	pos148	0			pos	23	23200000	15700000	12200000	9647603	20900000	20500000	11400000	18900000	9001191	23800000	0	13500000	18800000	19100000	11800000	12900000	18400000	18600000	10800000	11100000	25000000	15800000	6.57312e+06
160.085	7.17702	C6H12N2O3	5	Daminozide	7	0	KEGG	-0.242595	-27.1445	-0.250497	nFla'nFlaB'PQC'UI'UIB	Daminozide	0	bp			xNa+x-NH3	0.23	0.45	24900000	pos149	0		H	pos	24	9129356	6268310	6.56319e+06	5290345	8.194e+06	8536998	4789841	11000000	4.37891e+06	7.86297e+06	13500000	10500000	9949832	7967483	8.01863e+06	18300000	16900000	24900000	11500000	4547096	8586632	14500000	5.81704e+06
273.903	3.96767										nFla'nFlaB'UI'UIB		0	bp				0.78	0.78	24500000	pos150	0			pos	23	16800000	15900000	23300000	19100000	9973921	13600000	24500000	8397142	15100000	7337812	0	11000000	9935284	8556218	22700000	13200000	15500000	11400000	7.46425e+06	10600000	6.98549e+06	20400000	12000000
231.147	7.83949	C11H21NO4	3	O-Butanoylcarnitine	7	0	KEGG_Lipidmaps_HMDB	-0.182894	26.7123		nFla'nFlaB'PQC'UI'UIB	O-Butanoylcarnitine	0	bp				0.05	0.3	24100000	pos151	0		H	pos	24	9580009	10700000	12600000	10400000	12700000	12900000	12500000	14300000	24100000	14900000	12800000	13700000	13500000	14500000	13900000	12600000	15200000	16300000	16200000	12800000	12900000	10500000	15200000
295.911	8.64874										nFla'nFlaB'UI'UIB		0	bp				0.58	0.58	24100000	neg23	0			neg	23	18800000	20500000	24100000	20500000	17500000	18600000	23500000	18300000	19500000	16700000	0	18100000	18400000	17100000	23900000	19200000	20100000	18500000	17300000	18500000	17100000	21600000	20700000
774.541	3.36653	C42H79O10P	23	PG(36:2)	8	Central	0	0.311192	-18.8168	0.33496	nFla'nFlaB'PQC'UI'UIB	PG(36:2)	0	bp		2.5	xC13	0.13	0.14	24000000	neg24	0		H	neg	24	14900000	16500000	18300000	16700000	21400000	16100000	15300000	20200000	19900000	18300000	22500000	17400000	19000000	19000000	16100000	18800000	22600000	22200000	24000000	17400000	17500000	17600000	19600000
167.939	30.6777										nFla'nFlaB'PQC		0	bp				0.19	0.83	23900000	pos153	0			pos	24	3.26657e+06	6039007	8884393	15000000	5.4589e+06	3.79084e+06	6.40117e+06	6.41812e+06	13000000	4203042	13600000	11500000	10700000	8816269	8630856	9449931	5.35243e+06	4.6684e+06	23900000	10900000	3.60302e+06	3454552	21800000
229.939	6.03472										nFla'nFlaB'UI'UIB		0	bp				0.59	0.59	23800000	neg25	0			neg	23	20300000	18800000	22200000	20600000	16900000	18700000	23800000	16100000	19000000	15000000	0	17600000	16200000	15600000	22400000	17500000	19500000	18100000	15000000	18200000	16200000	21600000	20300000
245.174	21.1437	C11H23N3O3	1	Lys-Val	7	0	Peptides	-0.489202	40.7671	-0.512561	nFla'nFlaB'PQC'UI'UIB	Lys-Val	0	bp		-0.8	xC13x-NH3x2+	0.02	0.14	23000000	pos154	0		H	pos	24	15700000	16500000	20100000	16800000	17200000	17700000	15400000	16100000	21300000	17800000	20500000	21200000	21300000	20400000	20200000	16300000	20400000	23000000	21200000	19000000	18900000	16700000	20300000
335.903	8.27928										nFla'nFlaB'UI'UIB		0	bp				0.59	0.59	22900000	neg27	0			neg	23	18000000	18800000	20700000	19500000	16700000	17800000	22600000	16200000	19200000	15400000	0	17300000	17200000	15400000	22900000	18000000	19400000	18800000	16000000	15500000	14900000	20600000	19000000
145.085	14.4532	C5H11N3O2	3	4-Guanidinobutanoate	10	Central	KEGG_Metacyc_HMDB	-0.0908409	-0.052793	-0.0794922	nFla'nFlaB'PQC'UI'UIB	4-Guanidinobutanoate	0	bp		0.9	xC13	0.11	0.14	22200000	pos159	0		H	pos	24	13900000	13400000	15900000	15200000	15200000	17900000	15500000	19000000	21200000	17300000	20600000	20800000	17600000	18000000	16100000	16900000	17700000	21400000	16700000	16000000	22200000	17000000	17500000
779.541	3.86559				0.2						nFla'nFlaB'PQC'UI'UIB		0	bp				0.68	0.73	22100000	pos160	0			pospos	24	14000000	8.03541e+06	21300000	16800000	19200000	5.2159e+06	6211056	18200000	6.77428e+06	3888391	21400000	8149551	5.09621e+06	8352501	5746465	14600000	21200000	19800000	17500000	6.2787e+06	22100000	6445898	10300000
483.261	7.17375	C47H84O16P2	19	PIP(38:4)	8	Central	KEGG_HMDB	-1.87853	44.2411	2.28072	nFla'nFlaB'PQC'UI'UIB	PIP(38:4)	0	bp				0.29	0.29	21900000	neg26	0		2-charge	negpos	24	16000000	16800000	21900000	15200000	19500000	14500000	12100000	12500000	15600000	16700000	16900000	12600000	9430568	10700000	8.323e+06	11300000	15200000	17700000	16900000	15900000	14200000	11900000	15600000
811.604	3.64457				0.2						nFla'nFlaB'PQC'UI'UIB		0	bp				0.14	0.35	21600000	pos162	0			pos	24	18400000	18600000	17800000	19200000	20400000	19700000	16800000	20500000	21100000	20300000	13200000	12300000	13600000	12600000	17200000	20300000	16000000	19100000	20500000	20100000	13000000	10800000	21600000
117.054	15.3388	C3H7N3O2	1	Guanidinoacetate	10	Central	KEGG_Metacyc_HMDB	0.107167	-0.0257392	0.155401	nFla'nFlaB'PQC'UI'UIB	Guanidinoacetate	0	bp		0.4	xC13	0.24	0.24	21300000	pos156	0		H	pos	24	11400000	10400000	14500000	14400000	11900000	12700000	12800000	12000000	14000000	11200000	21300000	14700000	12700000	13500000	12700000	15200000	15000000	17900000	16800000	13300000	13300000	15400000	16600000
249.043	13.352				0.1						nFla'nFlaB'PQC'UI'UIB		0	bp	xK+			0.49	0.49	21100000	pos163	0			pos	24	12300000	11600000	15900000	16200000	10500000	10100000	21100000	9393183	10400000	7916025	3.96674e+06	8765588	11800000	10000000	18300000	13300000	13300000	9920920	11100000	8833236	6.73215e+06	15900000	15000000
167.939	30.0328				0.2						nFla'nFlaB'PQC		0	bp				0.17	0.86	20700000	pos161	0			pos	24	2.70312e+06	5.3338e+06	7713455	13500000	4571654	3172102	5.45881e+06	5.30335e+06	11500000	3.63671e+06	11500000	10300000	8510337	8669392	7.53221e+06	7814088	4.81876e+06	4.04846e+06	20700000	9685385	3.08114e+06	3.00051e+06	20400000
184.025	14.6285				0.1						nFla'nFlaB'UI'UIB		0	bp	xK+	C6	xC13x-H2OxK+	0.57	0.57	20700000	pos167	0			pos	23	16000000	16700000	15600000	13600000	18300000	14200000	11000000	15500000	16100000	16100000	0	18000000	19200000	17000000	15500000	20700000	18500000	18200000	18400000	17900000	14800000	13000000	15100000
128.059	14.2026	C5H8N2O2	3	5,6-Dihydrothymine	8	Central	KEGG_Metacyc_HMDB	-0.171706	42.2739	-0.171017	nFla'nFlaB'PQC'UI'UIB	5,6-Dihydrothymine	0	bp		1.6	xC13	0.15	0.17	20100000	pos168	0		H	pos	24	15600000	14600000	12300000	15500000	15200000	15300000	14700000	16200000	20000000	15500000	19400000	17500000	16500000	16800000	12500000	20000000	14300000	17200000	17200000	20100000	15900000	13200000	18900000
155.069	14.1578	C6H9N3O2	5	L-Histidine	10	Central	KEGG_Metacyc_HMDB	0.114765	0.919292	0.150653	nFla'nFlaB'PQC'UI'UIB	L-Histidine	0	bp		1	xC13x-FA	0.21	0.29	20100000	pos164	0		H	posneg	24	13100000	17200000	12100000	15200000	16800000	10600000	8666645	12500000	15200000	11500000	17100000	18000000	14900000	15600000	9868646	16600000	11400000	11200000	20100000	15600000	11600000	10500000	15300000
366.045	10.4303										nFla'nFlaB'PQC'UI'UIB		0	bp		C10	xS34xC13x2-mer	0.57	0.57	19900000	neg29	0			neg	24	17200000	18000000	19100000	17200000	16100000	17800000	19900000	16100000	17100000	15400000	36355.2	16000000	15900000	15100000	18600000	15300000	16500000	16500000	16100000	16500000	16000000	17900000	17400000
188.116	4.81434		0		#N/A			-0.0855831	#N/A	-0.0765655	nFla'nFlaB'PQC'UI'UIB	N6-Acetyl-L-lysine	0	bp				0.18	0.27	19700000	pos169	0		H	pos	24	14000000	14500000	9668935	7410879	10100000	13000000	11600000	11700000	7694989	11400000	17000000	19600000	15200000	14400000	12200000	13000000	19700000	14500000	12500000	11200000	13300000	11500000	10700000
169.025	14.0612				0.1						nFla'nFlaB'UI'UIB		0	bp	xK+			0.79	0.79	19400000	pos172	0			pos	23	8427147	8540902	19200000	12900000	7.50385e+06	7.63153e+06	15200000	6462206	10600000	7017244	0	7.54081e+06	9633919	7545348	19400000	7.04924e+06	10900000	8563598	8.22028e+06	5.3338e+06	3860850	10600000	10800000
834.663	7.17146										nFla'nFlaB'PQC'UI'UIB		0	bp		C54	xC13	0.49	0.49	19400000	pos171	0			pos	24	9533829	19400000	8858346	13300000	16500000	7749021	7164552	8594681	13800000	7253357	985471	10100000	9141040	9552810	8884766	7040631	8801845	7699981	13900000	6979810	7590163	7.2491e+06	10100000
789.552	3.38984	C42H80NO10P	18	PS(36:1)	8	Central	0	0.325398	-17.9996	0.336454	nFla'nFlaB'PQC'UI'UIB	PS(36:1)	0	bp		3.3	x-NH3xC13	0.18	0.19	19200000	pos166	0		H	pos	24	14500000	16200000	13700000	16300000	15300000	15800000	11200000	19200000	14400000	17300000	17100000	13300000	14500000	15200000	10200000	18000000	15400000	16800000	18700000	17200000	17200000	14200000	14100000
200.178	3.74396	C12H24O2	15	Dodecanoic acid	10	Central	KEGG_Metacyc_Lipidmaps_HMDB	-0.00280737	0.188962	0.0158137	nFla'nFlaB'PQC'UI'UIB	Dodecanoic acid	0	bp		0.3	xC13	0.05	0.33	19100000	neg30	0		H	neg	24	11000000	7.91993e+06	6957148	10800000	9809365	9752169	11900000	16500000	19100000	9202993	11700000	11400000	11600000	10700000	10500000	8353790	9043409	7151047	9947968	13000000	11900000	12800000	14800000
132.09	21.2774	C5H12N2O2	6	L-Ornithine	10	Central	KEGG_Metacyc_HMDB	-0.174867	-0.548018	-0.17467	nFla'nFlaB'PQC'UI'UIB	L-Ornithine	0	bp		0.7	x2-merxC13x-H2Ox-NH3xN15xNa+xK+	0.12	0.2	18900000	pos175	0		H	posneg	24	15900000	13500000	18000000	17200000	18400000	10300000	11600000	9546030	15400000	11800000	18900000	15800000	15500000	14900000	14100000	12400000	15600000	14100000	15300000	10200000	12800000	8.37582e+06	13800000
229.939	3.00853										nFla'nFlaB'PQC'UI'UIB		0	bp				0.69	0.69	18800000	neg31	0			neg	24	13800000	13100000	18700000	14300000	10300000	11500000	18800000	8962190	13500000	7924326	212823	10300000	9671719	8.38297e+06	18500000	11500000	13100000	10900000	7.96915e+06	11000000	7.84226e+06	16100000	13800000
303.293	7.23059										nFla'PQC'UI'UIB		0	bp				0.12	1.43	18600000	pos176	0			pos	24	1.92065e+06	1.60081e+06	1.55512e+06	1399025	1.70644e+06	1.68919e+06	1529333	18600000	2.14805e+06	2.21991e+06	2.99935e+06	2969431	2.75766e+06	2861624	3.71516e+06	1.36415e+06	1.7063e+06	1.78743e+06	1.87389e+06	2.13878e+06	2.2624e+06	1.65689e+06	3.84909e+06
117.115	12.2876	C6H15NO	1	2-Methylcholine	7	0	KEGG_Metacyc	-0.0160019	-21.7034	-0.088662	nFla'nFlaB'PQC'UI'UIB	2-Methylcholine	0	bp		1.3	xC13	0.04	0.06	18300000	pos165	0		H	pos	24	15800000	17900000	16700000	17600000	17600000	17800000	18200000	17000000	15800000	17300000	17800000	16500000	16100000	16300000	16200000	17800000	17400000	17800000	15600000	17300000	18300000	16900000	16800000
131.095	10.3656		0		0.2			-0.136586	#N/A	-0.130673	nFla'nFlaB'PQC'UI'UIB	L-Leucine	0	bp				0.51	0.51	18200000	pos173	0		H	posneg	24	4.4878e+06	6.14512e+06	4.24213e+06	4622406	4.60848e+06	4.49309e+06	2.37561e+06	4.74231e+06	6.07846e+06	3.7984e+06	18200000	7052267	7.94503e+06	8563353	6119350	6971712	7400030	9547843	11200000	4875621	4440299	3.87388e+06	5287262
229.939	2.24218				0.2						nFla'nFlaB'PQC'UI'UIB		0	bp				0.73	0.73	18200000	neg33	0			neg	24	13000000	12400000	17300000	13000000	9106156	10300000	18200000	7.74564e+06	11100000	5800458	194799	9554489	8491614	7.30101e+06	18100000	10000000	12300000	9990419	6882472	9659748	6.6644e+06	15000000	13200000
169.085	11.6256	C7H11N3O2	5	N(pi)-Methyl-L-histidine	10	Central	KEGG_Metacyc_HMDB	-0.199203	-0.305782	-0.201779	nFla'nFlaB'PQC'UI'UIB	N(pi)-Methyl-L-histidine	0	bp		0.1	xC13x-FA	0.2	0.2	18100000	pos170	0		H	pos	24	8056794	9231011	8.37778e+06	10300000	10500000	11100000	7.65802e+06	9755733	13400000	10200000	16300000	14000000	11600000	13100000	9395886	14300000	14100000	18100000	15900000	12500000	10500000	9368506	14100000
238.142	4.80569							-5.74972			nFla'nFlaB'PQC'UI'UIB		0	bp		C10	xNH3xNa+xC13	0.11	0.66	18100000	pos178	0			pos	24	8.27024e+06	8146252	7215746	7.64428e+06	5148595	10800000	8802283	15700000	7.41922e+06	5.8836e+06	7.09633e+06	6695235	6620027	7051256	5.33347e+06	7388693	14600000	10700000	9175856	18100000	5.24629e+06	6115527	8.06318e+06
346.078	15.1821	C14H16N2O7	1	Portulacaxanthin I	7	0	KEGG	0.974734	-39.93		nFla'nFlaB'PQC'UI'UIB	Portulacaxanthin I	0	bp		-2	xC13xK+	0.54	0.54	17900000	pos179	0		Na	pos	24	9356268	10900000	15900000	13300000	12000000	13300000	14800000	12600000	17900000	12600000	431938	16000000	14200000	14100000	15800000	16100000	15300000	16900000	14200000	15300000	14100000	14500000	14700000
220.035	13.489	C9H10O5	5	3-(3,4-Dihydroxyphenyl)lactate	8	Central	KEGG_Metacyc_HMDB	0.451621	34.1521		nFla'nFlaB'UI'UIB	3-(3,4-Dihydroxyphenyl)lactate	0	bp		-2.8	xC13	0.61	0.61	17700000	pos180	0		Na	pos	23	17400000	13800000	17200000	14300000	15800000	10200000	13800000	9732771	10400000	9417601	0	9612236	13800000	10400000	15200000	15100000	17700000	13600000	10700000	7731939	7060383	11600000	11300000
842.508	3.31439	C48H75O10P	3	PG(42:10)	8	Central	0	-2.21114	-20.6858	0.664322	nFla'nFlaB'PQC'UI'UIB	PG(42:10)	0	bp		-3.5	xNa+xC13	0.51	0.51	17600000	pos181	0		H	pos	24	13600000	15700000	17600000	13900000	12400000	12600000	12300000	11200000	12300000	11300000	1.27793e+06	13600000	14100000	12000000	15600000	11900000	15100000	13900000	11400000	13800000	11500000	14100000	14900000
820.526	3.3556	C46H77O10P	14	PG(40:7)	8	Central	0	0.263082	-19.2037	0.282582	nFla'nFlaB'PQC'UI'UIB	PG(40:7)	0	bp		-0.2	xC13	0.1	0.12	17500000	neg32	0		H	neg	24	12400000	14100000	15000000	11900000	14400000	12600000	10800000	12700000	13600000	12700000	17500000	15000000	14300000	14900000	13300000	12000000	15500000	14000000	15600000	15100000	14100000	13600000	14500000
812.678	27.684		0		#N/A			0.566644	#N/A		nFla'nFlaB'PQC'UI'UIB	SM(d18:1/24:1(15Z))	0	bp		-0.4	xC13xNa+	0.08	0.35	17000000	pos182	0		H	pos	24	8776521	11600000	13100000	6231668	14400000	7181829	5488535	7151552	7.91229e+06	8569038	16800000	14000000	15000000	16300000	17000000	5277234	13100000	12700000	10000000	5801978	7.38305e+06	5.97955e+06	6.32075e+06
189.947	4.34241										nFla'nFlaB'UI'UIB		0	bp				0.72	0.72	16900000	neg34	0			neg	23	11000000	9911679	11900000	10600000	7658173	9442757	12600000	7276627	9083938	6.60089e+06	0	8673288	8353710	7873209	16900000	8868025	10200000	9076346	7203486	8687896	7.11099e+06	11900000	11100000
712.06	14.3417										nFla'nFlaB'PQC'UI'UIB		0	bp			xCl37	0.49	0.49	16900000	pos157	0			pos	24	5.38359e+06	6195971	2433228	7016805	7170700	5.9207e+06	2.01287e+06	7904316	10100000	7329135	16900000	12200000	9336738	11000000	2.6944e+06	9607263	6124238	7.44911e+06	13900000	12600000	7512577	3.51981e+06	8778721
144.126	9.93957	C7H16N2O	2	N-Acetylcadaverine	7	0	Metacyc_HMDB	-0.122591	-1.26992	-0.11541	nFla'nFlaB'PQC'UI'UIB	N-Acetylcadaverine	0	bp				0.07	0.17	16600000	pos183	0		H	pos	24	13000000	12400000	9678482	9717641	11300000	10000000	8939270	10900000	11200000	12300000	14400000	13300000	13700000	13200000	11800000	13900000	16600000	14600000	14200000	11500000	15500000	11200000	10100000
160.121	21.5052	C7H16N2O2	5	N6-Methyl-L-lysine	8	Central	KEGG_Metacyc_HMDB	-0.135807	23.0927	-0.131001	nFla'nFlaB'PQC'UI'UIB	N6-Methyl-L-lysine	0	bp		0.4	x-NH3xNa+xC13xN15	0.09	0.15	16600000	pos184	0		H	pos	24	10700000	11200000	14700000	13400000	14400000	12300000	14700000	10600000	15100000	12000000	16600000	13900000	13700000	13800000	13800000	13900000	16400000	16000000	15600000	12500000	11100000	12000000	14700000
280.24	3.60891	C18H32O2	111	FA (18:2)	8	Central	Lipidmaps	-0.428619	-1.64916	-0.499995	nFla'nFlaB'PQC'UI'UIB	FA (18:2)	0	bp		1.1	xC13	0.04	0.34	16500000	neg35	0		H	neg	24	10300000	5.65211e+06	5938392	8.37031e+06	8178333	8681110	10800000	13100000	16500000	6.93297e+06	11300000	10200000	10400000	10500000	10300000	7.08227e+06	6904867	6.01132e+06	8.05585e+06	10700000	13100000	11200000	12800000
335.903	4.67725										nFla'nFlaB'UI'UIB		0	bp				0.71	0.71	16400000	neg36	0			neg	23	8822919	8622197	11000000	8000712	5366376	6.2498e+06	12400000	4.7514e+06	7117799	4250913	0	8935604	8307014	7.1782e+06	16400000	5618883	10800000	6.00042e+06	4445409	5.95981e+06	3994199	9103843	7.33435e+06
228.209	3.67669	C14H28O2	23	Tetradecanoic acid	8	Central	KEGG_Metacyc_Lipidmaps_HMDB	0.161824	-5.46301	0.219148	nFla'nFlaB'PQC'UI'UIB	Tetradecanoic acid	0	bp		-0.5	xC13	0.03	0.44	16200000	neg37	0		H	neg	24	8037869	4.46953e+06	5054991	6.17361e+06	7.25856e+06	6.61022e+06	7.60245e+06	8250551	10300000	6.34565e+06	7.69363e+06	7602982	7160441	7.50528e+06	7586087	5.36961e+06	7310837	5.17147e+06	6.62383e+06	7.66457e+06	16200000	7714353	8.38067e+06
138.043	7.49898	C6H6N2O2	3	4-Nitroaniline	7	0	KEGG_Metacyc	-0.258943	13.0228		nFla'nFlaB'PQC'UI	4-Nitroaniline	0	bp			x-H2O	0.17	1.33	16200000	pos185	0		H	posneg	24	2.0397e+06	2.47804e+06	1.16637e+06	1.83705e+06	3.70181e+06	1.51142e+06	1.80613e+06	2.02205e+06	2232846	1.4829e+06	1.77498e+06	2.2367e+06	2.06497e+06	1.98696e+06	2.76383e+06	1.46935e+06	1.03682e+06	1.58563e+06	1.73997e+06	2.42522e+06	16200000	1523193	2.11329e+06
331.324	7.18318	C23H38	1	3Z,6Z,9Z,12Z,15Z-Tricosapentaene	7	0	Lipidmaps	0.715576	44.3144		nFla'PQC'UI	3Z,6Z,9Z,12Z,15Z-Tricosapentaene	0	bp				0.11	1.38	15900000	pos186	0		NH3	pos	24	1.7866e+06	1.21132e+06	1.38042e+06	1.72425e+06	1.63943e+06	1432607	1626640	15900000	2.21709e+06	1783786	2174338	2.83973e+06	2.5939e+06	2.22463e+06	2.3939e+06	1.21672e+06	1.15136e+06	1.41987e+06	1.54335e+06	1752837	1.75516e+06	1.37707e+06	7406664
259.19	19.3332	C12H25N3O3	2	Ile-Lys	7	0	Peptides	-0.224948	43.563		nFla'nFlaB'PQC'UI'UIB	Ile-Lys	0	bp		-0.8	xC13	0.07	0.19	15800000	pos187	0		H	posneg	24	9217565	8466773	8878598	7.60618e+06	8689591	15800000	10200000	10800000	12100000	14300000	12100000	10500000	10500000	11200000	10200000	7.45202e+06	9391597	10900000	9240281	11400000	12700000	13000000	12400000
189.947	2.4773				0.2						nFla'nFlaB'PQC'UI'UIB		0	bp				0.67	0.67	15800000	neg38	0			neg	24	12000000	11500000	15400000	11600000	8868708	10400000	15800000	7.26698e+06	10800000	6757255	140415	9067607	8307438	7.27211e+06	15300000	9494571	11500000	9848955	7.21932e+06	9361176	7017876	13400000	12200000
266.13	13.3336							-3.15943			nFla'nFlaB'PQC'UI'UIB		0	bp		C11	xS34xC13xK+	0.07	0.12	15400000	pos189	0			pos	24	10500000	10700000	11000000	10300000	13500000	11900000	10600000	12100000	12100000	11600000	14500000	13100000	12500000	12500000	12000000	12900000	14000000	15400000	13300000	11000000	11900000	12200000	11600000
715.823	10.8815										nFla'nFlaB'UI'UIB		0	bp				0.7	0.7	15300000	pos190	0			pos	23	13400000	12100000	15300000	12000000	8302486	11600000	15100000	7611327	10900000	5835410	0	9474759	7.55598e+06	6.11047e+06	14600000	8230200	10500000	9516847	5746213	10200000	8788086	14200000	10500000
175.096	15.3926	C6H13N3O3	3	L-Citrulline	10	Central	KEGG_Metacyc_HMDB	0.147908	0.151832	0.182819	nFla'nFlaB'PQC'UI	L-Citrulline	0	bp			xK+x-NH3	0.7	1.11	15100000	pos191	0		H	pos	24	2044148	2384124	2532543	2392094	2827705	2046680	2464519	2.14491e+06	2601328	2.00091e+06	8347480	2.87756e+06	2.46844e+06	2.33124e+06	2596588	3043115	3.04137e+06	3267079	3.89705e+06	2.77641e+06	15100000	2.39234e+06	2.9791e+06
229.939	4.15611				0.2						nFla'nFlaB'UI'UIB		0	bp				0.67	0.67	15100000	neg39	0			neg	23	10700000	10900000	15000000	12500000	8207466	9918242	15100000	7.35923e+06	10300000	7038026	0	8815656	8689987	7701028	15100000	9285732	10800000	8935191	7.01593e+06	9046666	6602935	13000000	10900000
229.939	3.77902				0.2						nFla'nFlaB'UI'UIB		0	bp				0.7	0.7	15100000	neg40	0			neg	23	10900000	10800000	14200000	11900000	8355733	9634281	15000000	7.37008e+06	9932999	6517340	0	8400568	7764031	6836031	15100000	9013448	10700000	8935191	6.37796e+06	8652508	6.1422e+06	12900000	11300000
138.043	10.8808	C6H6N2O2	3	Urocanate	10	Central	KEGG_Metacyc_HMDB	-0.204612	0.63776		nFla'nFlaB'PQC'UI	Urocanate	0	bp				0.18	1.64	14800000	pos194	0		H	pos	24	1412228	2.00978e+06	1.0392e+06	1154169	3745829	1.51025e+06	1.12948e+06	1.71612e+06	1.36607e+06	1.67392e+06	2.3739e+06	2071411	1.67731e+06	1.8312e+06	1.52985e+06	1.77756e+06	893374	1.11152e+06	445258	1.45886e+06	14800000	1.07004e+06	478628
202.143	20.5325	C8H18N4O2	3	Arg-OEt	7	0	KEGG	0.161248	17.5071		nFla'nFlaB'PQC'UI'UIB	Arg-OEt	0	bp		-0.8	xC13	0.03	0.16	14700000	pos195	0		H	pos	24	11900000	13500000	14700000	12300000	12900000	10400000	9212371	9917938	11700000	10200000	12200000	12300000	11700000	11500000	11700000	8895668	10500000	13200000	10800000	10200000	13200000	9381427	11600000
129.152	14.6802	C8H19N	2	Tetraethylammonium	7	0	KEGG	0.271378	39.699	0.339343	nFla'nFlaB'PQC'UI'UIB	Tetraethylammonium	0	bp		-0.4	xC13	0.16	0.48	14600000	pos196	0		H	pos	24	5840311	5316192	4269080	11000000	5.08573e+06	4.27125e+06	9482682	13700000	9392329	7.0084e+06	10600000	8243886	7.68337e+06	7913021	7.04385e+06	7.9733e+06	5.41613e+06	4017721	6532326	14600000	6.63502e+06	5.94274e+06	5.56583e+06
216.061	13.1238	C7H14O6	18	1-O-Methyl-myo-inositol	8	Central	KEGG_Metacyc	0.0170013	-2.07623		nFla'nFlaB'PQC'UI'UIB	1-O-Methyl-myo-inositol	0	bp		-0.7	xC13	0.16	0.75	14500000	pos197	0		Na	posneg	24	4.35602e+06	2.1551e+06	480636	4211371	2.80341e+06	2.74027e+06	4.28784e+06	9912217	7327107	4402704	5491401	5.5352e+06	3.92649e+06	4.71178e+06	4.02632e+06	7.29975e+06	2135463	1.93849e+06	8067231	14500000	2.92892e+06	8783394	3.20824e+06
633.643	3.48625										nFla'nFlaB'PQC'UI'UIB		0	bp		C45	xC13	0.07	0.42	14500000	pos198	0			posneg	24	6.9259e+06	8235057	7.78374e+06	9280597	8454453	7.97826e+06	8872380	8683456	8826319	8787310	4.10783e+06	3996578	4.1629e+06	3.74706e+06	3.50497e+06	14500000	5.18974e+06	10500000	8.29773e+06	9851148	2.14553e+06	8859784	9429257
188.116	5.3454		0		#N/A			-0.181268	#N/A	-0.181773	nFla'nFlaB'PQC'UI'UIB	N6-Acetyl-L-lysine	0	bp				0.49	0.66	14400000	pos201	0		H	pospos	24	13000000	10900000	6202742	4728228	5275914	9023042	4526680	8038589	12200000	9827308	3414411	3.50872e+06	2.44642e+06	7.40098e+06	3082074	6237123	3.24976e+06	5.69301e+06	14400000	12900000	11800000	13500000	9522192
228.134	4.10856				0.1						nFla'UI'UIB		0	bp	xNa+			0.98	0.98	14400000	pos199	0			pos	23	6.68509e+06	4427301	4915000	2737708	4210801	4.82163e+06	14400000	1.89971e+06	3.06585e+06	2.75487e+06	0	1.29075e+06	1.2443e+06	1.37619e+06	4417481	6.26879e+06	4780166	4.09703e+06	2.35207e+06	5.15593e+06	1.00556e+06	6.73396e+06	4.49715e+06
233.07	12.4286							3.9623			nFla'nFlaB'PQC'UI'UIB		0	bp			xS34	0.27	0.27	14300000	pos203	0			pos	24	13000000	12400000	10800000	11600000	10600000	13100000	11100000	11700000	11900000	11400000	4990418	11400000	10300000	10700000	9265054	12600000	14300000	12700000	11300000	12500000	13400000	13200000	11300000
202.132	11.8329	C9H18N2O3	3	Ile-Ala	7	0	Peptides	0.498297	18.2062	0.560338	nFla'nFlaB'PQC'UI'UIB	Ile-Ala	0	bp		-0.3	xC13	0.07	0.16	14200000	pos206	0		H	pos	24	8319694	9631523	10500000	9492634	9433678	10700000	9516818	9427678	13400000	9892300	11200000	11200000	11200000	10100000	12200000	10300000	11000000	14200000	12200000	11900000	10400000	11100000	12500000
156.054	11.1136	C6H8N2O3	4	4-Imidazolone-5-propanoate	8	Central	KEGG_Metacyc_HMDB	0.265027	12.8246	0.319063	nFla'nFlaB'PQC'UI'UIB	4-Imidazolone-5-propanoate	0	bp		0.6	x-FAxC13	0.19	0.28	14100000	pos208	0		H	pos	24	9055191	8921367	7792043	7.31157e+06	10700000	14000000	6.92578e+06	10400000	9570237	14100000	10200000	9402242	8487685	10400000	6234192	8451625	9037342	11500000	6.02013e+06	6918123	9878252	7115702	6255780
167.939	28.0849										nFla'nFlaB'PQC		0	bp				0.25	0.92	14100000	pos204	0			pos	24	1.60762e+06	3015180	4.52362e+06	8151619	2.59751e+06	1810791	2.98972e+06	3.18945e+06	6.60278e+06	2.04895e+06	6.10652e+06	5.68113e+06	4012122	3.36148e+06	4.20395e+06	4739058	2.63209e+06	2480696	14100000	5480237	2.34249e+06	1.71185e+06	13700000
208.949	14.9019										nFla'nFlaB'UI'UIB		0	bp			x2-merxK+	0.56	0.56	14100000	pos207	0			pos	23	14100000	9193582	8.34284e+06	4.74393e+06	12900000	13600000	11100000	9637347	4459473	13900000	0	5505450	6487189	6046559	6174259	4735242	9591105	9175017	2.71079e+06	3.61084e+06	8653324	11900000	2.83141e+06
163.967	8.23792				0.2						nFla'nFlaB'PQC'UI'UIB		0	bp				0.58	0.58	14000000	neg41	0			neg	24	12500000	12400000	14000000	12700000	11800000	11600000	13800000	11200000	12300000	10500000	10203.2	11700000	11100000	10400000	14000000	10000000	13800000	9908448	9919790	13700000	11100000	13200000	12700000
435.079	13.8373										nFla'nFlaB'PQC		0	bp		C17	xC13	0.32	0.32	14000000	pos209	0			posneg	15	13300000	13600000	13000000	13500000	14000000	7627331	7027244	9372674	7.48486e+06	9403962	9445880	5.57124e+06	5456494	4.92212e+06	4877244	0	0	0	0	0	0	0	0
222.965	14.6332										nFla'nFlaB'UI'UIB		0	bp		C5	xC13x2-merxK+	0.6	0.6	13800000	pos211	0			pos	23	8.1395e+06	6.53652e+06	9208296	6833780	6.66736e+06	10900000	9109048	5678586	8031563	7323287	0	7.02394e+06	9275509	7662540	10800000	9323559	13800000	13300000	8.37599e+06	6.31729e+06	5792579	13000000	8.21659e+06
438.107	13.2729				0.1			4.16798			nFla'nFlaB'PQC'UI'UIB		0	bp	xK+	C15	xNa+xC13xK+	0.54	0.54	13800000	pos212	0			posneg	24	8669267	11400000	11100000	10100000	13800000	10200000	9924706	10500000	11600000	11700000	588328	12700000	11700000	12000000	9796879	11900000	11500000	11900000	13000000	9673345	8908433	9779080	11100000
307.084	15.8189	C10H17N3O6S	3	Glutathione	8	Central	KEGG_Metacyc_HMDB	0.891007	-8.3	-1.22568	nFla'nFlaB'PQC'UI'UIB	Glutathione	0	bp				0.3	0.3	13700000	pos193	0		H	posneg	24	7943366	9276313	11300000	10700000	9196307	6.64385e+06	7.28736e+06	6.37316e+06	8469976	6219617	13700000	8.20817e+06	7740115	7398879	7594439	7903101	6914121	7.02795e+06	8536763	7026362	5.84809e+06	6.37392e+06	9322305
724.552	4.88769										nFla'nFlaB'PQC'UI'UIB		0	bp				0.38	0.38	13600000	pos214	0			pos	24	8694764	9389317	11100000	10400000	7.75957e+06	9733180	11400000	8082209	8983248	6180521	2.33639e+06	8.13652e+06	6.83983e+06	7342132	8631868	13600000	8083445	8581373	8.0042e+06	9451287	7586186	11200000	9630030
266.165	3.75271	C12H27O4P	1	Tributyl phosphate	7	0	KEGG	-0.688581	0.789989	-0.594947	nFla'nFlaB'PQC'UI'UIB	Tributyl phosphate	0	bp				0.05	0.36	13500000	pos177	0		H	pos	24	11600000	10600000	7210239	5.18104e+06	12900000	12000000	11100000	9523666	8293908	9616526	4.81845e+06	4.56108e+06	4.35475e+06	4939270	4779009	13500000	10200000	11600000	7882434	12200000	4.30829e+06	8225025	7046824
103.1	13.6721		0		#N/A			-0.47331	#N/A	-0.648264	nFla'nFlaB'PQC'UI'UIB	Choline	0	bp				0.06	0.08	13500000	pos215	0		H	pos	24	10800000	11300000	11300000	11300000	11700000	12500000	11800000	12500000	13000000	13500000	12600000	12000000	11100000	11500000	11000000	11600000	11200000	11600000	10900000	11300000	10400000	11800000	13000000
189.947	3.95937				0.2						nFla'nFlaB'UI'UIB		0	bp				0.63	0.63	13500000	neg42	0			neg	23	10400000	9366816	12100000	9988606	7759766	9247603	13500000	7258157	9291563	6500261	0	8.38789e+06	7.53826e+06	6813550	12100000	8842633	9432093	8.32285e+06	6651090	8687896	6.57554e+06	11900000	10400000
163.967	5.60086										nFla'nFlaB'UI'UIB		0	bp				0.6	0.6	13400000	neg43	0			neg	23	10200000	8256055	11200000	8801509	8.29831e+06	8945362	13400000	7.80588e+06	9756657	6239520	0	8610288	8302298	7247525	11300000	8647274	10200000	8708664	7990640	8980232	7.64936e+06	11500000	8567006
233.07	27.3626							3.4264			nFla'nFlaB'PQC'UI'UIB		0	bp		C7	xNa+xC13	0.14	0.14	13400000	pos216	0			pos	24	9849774	9996113	9034456	11800000	10200000	10200000	12100000	11000000	10300000	10100000	13400000	10900000	11000000	9414151	9807961	12600000	11100000	10100000	10400000	10400000	10000000	11200000	10500000
297.34	7.18628	C20H43N	1	Tetrapentylammonium	7	0	KEGG	1.16114	45.3546	1.24237	nFla'nFlaB'PQC'UI'UIB	Tetrapentylammonium	0	bp				0.11	0.58	13300000	pos217	0		H	pos	24	2.72429e+06	1.19296e+06	1082198	1529927	1.11501e+06	962907	865652	1.10091e+06	911590	863994	2.97951e+06	3.96678e+06	3.28933e+06	3.8346e+06	3.62847e+06	13300000	11800000	1.35903e+06	10300000	1.01771e+06	966396	1.10092e+06	998686
295.911	3.0557										nFla'nFlaB'PQC'UI'UIB		0	bp				0.79	0.79	13300000	neg44	0			neg	24	8903931	8665719	12700000	9240679	5.85828e+06	6.9484e+06	13300000	5.02426e+06	8561087	4.04547e+06	89792.9	5985941	5535397	4744779	13000000	6647499	8273138	6.6168e+06	4260693	6.54613e+06	4.17999e+06	10700000	8980060
296.104	4.81619	C18H16O4	5	Dasytrichone	7	0	KEGG_Lipidmaps	-1.22478	-32.3239		nFla'nFlaB'PQC'UI'UIB	Dasytrichone	0	bp				0.77	0.77	13200000	pos219	0		H	posneg	24	2485323	3.29216e+06	1.95469e+06	1.621e+06	3.21109e+06	2.27118e+06	1.67137e+06	3704079	2.25896e+06	2.4405e+06	13200000	4705605	3.2638e+06	5119909	2.0232e+06	2.57557e+06	2889645	3.65915e+06	4076029	2.91896e+06	3.83495e+06	2.20164e+06	2164660
730.601	5.93117	C41H83N2O6P	8	SM(d36:1)	8	Central	KEGG_Lipidmaps_HMDB	2.4082	32.5597		nFla'nFlaB'PQC'UI'UIB	SM(d36:1)	0	bp				0.45	0.45	13200000	pos221	0		H	pos	24	4.84323e+06	6.30592e+06	5.92832e+06	4.5293e+06	6.56186e+06	4.80388e+06	3.92294e+06	4.99512e+06	5.77967e+06	5.10495e+06	13200000	6286974	6018629	6405366	4.83277e+06	4724796	5455148	5.40504e+06	6198952	3.98221e+06	4.11904e+06	3627227	4788751
134.094	4.63101										nFla'PQC'UI'UIB		0	bp				0.46	1.04	13200000	pos220	0			pos	24	8568761	4.41522e+06	3638505	10200000	5.23581e+06	1.19497e+06	866281	1355747	2217844	7321778	9143987	8484615	8115887	1.6018e+06	10400000	8033251	2.15416e+06	1.82179e+06	3.12777e+06	12100000	13200000	6.7738e+06	1.86003e+06
275.148	16.2888	C11H21N3O5	6	Epsilon-(gamma-Glutamyl)-lysine	7	0	HMDB	-0.433906	-3.05178		nFla'nFlaB'PQC'UI'UIB	Epsilon-(gamma-Glutamyl)-lysine	0	bp		0	xK+xC13x-H2Ox-NH3	0.12	0.32	12800000	pos200	0		H	posneg	24	7.95188e+06	7278951	9877816	8069156	7599700	5.37631e+06	7.02039e+06	5762322	8588565	6.93665e+06	11100000	10600000	8.32677e+06	8907005	9539844	7.27446e+06	10300000	7.79964e+06	12800000	7140111	7.54656e+06	6.34089e+06	12000000
246.133	13.3343	C9H18N4O4	2	N2-(D-1-Carboxyethyl)-L-arginine	8	Central	KEGG_Metacyc	-0.554801	-36.9643	-0.582937	nFla'nFlaB'PQC'UI	N2-(D-1-Carboxyethyl)-L-arginine	0	bp			x-NH3	0.16	2.03	12800000	pos222	0		H	pos	24	466370	448245	432923	454242	667918	322355	354606	311949	471006	268600	427899	393907	278564	328013	385896	350430	288210	319130	469286	269383	12800000	249778	342956
243.09	8.50736		0		0.1			-0.410564	#N/A		nFla'nFlaB'PQC'UI'UIB	CAPS	0	bp	xNa+	2.3	xC13xNa+	0.36	0.36	12800000	pos223	0		Na	pos	24	9241019	9242286	8.31041e+06	6.76953e+06	10900000	9757204	9188629	10200000	9043741	11300000	5635283	12800000	6.13577e+06	12500000	9784408	11000000	5.31516e+06	8503381	6621184	8936108	12200000	8.13992e+06	8606186
216.04	14.0763	C5H13O7P	1	2-C-Methyl-D-erythritol 4-phosphate	8	Central	KEGG_Metacyc	1.0252	-7.32922	0.241499	nFla'nFlaB'PQC'UI'UIB	2-C-Methyl-D-erythritol 4-phosphate	0	bp		1.4	xCl37xC13	0.23	0.73	12700000	neg45	0		H	negneg	24	3.86962e+06	5.04274e+06	4513928	7.34234e+06	4.1793e+06	3.53587e+06	1.8549e+06	5.61823e+06	12400000	4.52457e+06	7961665	7500909	6631991	7156971	4.0006e+06	5462855	3282773	6180163	9888410	8469652	4.71636e+06	2.83264e+06	12700000
260.124	4.81059				0.1						nFla'nFlaB'UI'UIB		0	bp	xNa+			0.69	0.69	12700000	pos224	0			pos	23	6833606	6.45855e+06	9136162	5.77024e+06	2.99044e+06	6385489	12700000	7648457	5.30917e+06	1.94891e+06	0	3.74907e+06	3.56834e+06	4217026	7.26658e+06	4.68591e+06	9630597	6366062	3776905	9877117	2.23243e+06	5.05186e+06	6192693
191.025	15.5238		0		0.4			0.0825598	#N/A	0.10788	nFla'nFlaB'UI'UIB	a Cysteine adduct	0	bp			x-FAxK+	0.92	0.92	12600000	pos205	0		H	pos	24	1.56139e+06	4985590	6.30655e+06	5.90422e+06	3.01316e+06	1.80251e+06	2.08731e+06	2.83445e+06	3.97926e+06	1.16796e+06	12600000	2.84199e+06	2.66051e+06	2680471	3023128	1.96022e+06	958028	3.43765e+06	4.41285e+06	2.08158e+06	486256	1796842	5.16197e+06
287.985	15.1076										nFla'nFlaB'PQC'UI'UIB		0	bp		C5	x2-merxC13xS34	0.55	0.55	12600000	neg46	0			neg	24	6.5766e+06	6142836	8.1169e+06	5726083	7.40942e+06	11000000	9583328	8572660	8.24564e+06	10200000	93646.4	9498707	9278567	9616943	9162786	9978648	10900000	12600000	5.48766e+06	7.90073e+06	10400000	10900000	5.84696e+06
485.86	9.41422										nFla'nFlaB'UI'UIB		0	bp				0.57	0.57	12600000	pos225	0			pos	23	11200000	11100000	12600000	10900000	9886611	6.44075e+06	7201482	6.65141e+06	6.73357e+06	6.96828e+06	0	10200000	9553349	9304262	12100000	9892236	10800000	10100000	8889670	10400000	9995805	7.81029e+06	7269664
243.183	4.31481	C13H25NO3	1	N-Undecanoylglycine	7	0	HMDB	-0.379746	-4.43234		nFla'nFlaB'PQC'UI'UIB	N-Undecanoylglycine	0	bp			x-H2OxNa+	0.33	0.33	12500000	pos226	0		H	posneg	24	10100000	5371221	7.49039e+06	6.98319e+06	11400000	6569200	6.93941e+06	11200000	6137223	7.877e+06	12500000	8553978	6.02029e+06	9998799	5.85441e+06	7866159	5.15193e+06	7454746	8111302	8534939	9732085	4.53012e+06	7206269
129.152	7.96396	C8H19N	2	Octylamine	7	0	KEGG	-0.0197516	23.5293	0.00400484	nFla'nFlaB'PQC'UI'UIB	Octylamine	0	bp		2.7	xC13	0.1	0.1	12400000	pos227	0		H	pos	24	12200000	11300000	11300000	10500000	11700000	11300000	10800000	11500000	12000000	11000000	8474611	10900000	11200000	10200000	10500000	11000000	11100000	12000000	12100000	12200000	12400000	11800000	11800000
241.635	17.176										nFla'nFlaB'PQC'UI'UIB		0	bp		C5	x2-merxC13	0.05	0.32	12400000	pos228	0			pos	24	5.90726e+06	6.86173e+06	7.86916e+06	9799540	5.97155e+06	7558567	6.36833e+06	6.75722e+06	12400000	6.58776e+06	8737681	8397125	7732554	7.98557e+06	8487215	7.99694e+06	7913206	9035197	8679498	9658274	8.04961e+06	8.01943e+06	7.48993e+06
278.152	27.4406		0		#N/A			-0.900911	#N/A		nFla'nFlaB'PQC'UI'UIB	2-Ethylhexyl phthalate	0	bp		0.2	xC13xNa+	0.05	0.11	12300000	pos230	0		H	pos	24	11300000	11600000	9550886	10200000	11000000	11400000	10600000	11100000	9332791	11300000	10900000	9980235	9962869	9987606	11100000	11800000	11500000	10900000	10300000	11100000	12300000	10900000	9121234
794.609	3.81897				0.2			3.51232			nFla'nFlaB'PQC'UI'UIB		0	bp				0.1	0.2	12300000	pos229	0			pos	24	11700000	11200000	10500000	9127594	10600000	9464299	9644529	6.16602e+06	8.17816e+06	11000000	12300000	11200000	12300000	11100000	9691611	7890265	10500000	9084466	8873604	10200000	10800000	9557634	10300000
730.6	4.71201	C41H83N2O6P	8	SM(d36:1)	8	Central	KEGG_Lipidmaps_HMDB	1.00031	15.1106		nFla'nFlaB'PQC'UI'UIB	SM(d36:1)	0	bp		-3.5	xC13	0.3	0.3	12100000	pos232	0		H	pos	24	10400000	10700000	9921384	10400000	10400000	10100000	8687956	10200000	11500000	10900000	12100000	7700943	7482226	6853698	5.98602e+06	11600000	9630277	11000000	9947329	9793689	9405333	8452899	9760870
234.085	15.8903	C8H14N2O6	3	L-beta-aspartyl-L-threonine	7	0	HMDB	-0.2314	-39.7229	-0.23573	nFla'nFlaB'PQC'UI'UIB	L-beta-aspartyl-L-threonine	0	bp		0.7	xO18xC13x-H2OxK+	0.16	0.25	12100000	pos213	0		H	posneg	24	5715035	5227118	5.49652e+06	4.85671e+06	6901541	5703516	5114825	7023228	4250576	6.09893e+06	10200000	7.67963e+06	7.18356e+06	7.15942e+06	7.30447e+06	9798315	10500000	12100000	9475025	5193727	5908746	9558004	6344648
701.975	10.0971										nFla'nFlaB'UI'UIB		0	bp			xNa+	0.56	0.56	12100000	pos231	0			pos	23	10700000	11300000	11700000	11300000	9678058	10000000	12100000	10200000	10500000	8970969	0	9991357	9771742	10700000	11200000	10400000	11100000	9126347	10500000	10800000	8642804	12100000	10700000
199.061	13.779	C10H11NO2	3	1,2-Dehydrosalsolinol	7	0	HMDB	0.711194	41.545		nFla'nFlaB'PQC'UI'UIB	1,2-Dehydrosalsolinol	0	bp				0.26	0.44	12000000	pos188	0		Na	pos	24	3.54804e+06	3.97891e+06	3.77579e+06	5730165	4357848	3.70707e+06	3.26603e+06	4278717	7230469	3.97939e+06	9602862	6892076	6072572	7439666	4624251	6.17093e+06	5327384	5597798	12000000	8616094	5.28847e+06	4258983	9683990
131.058	9.11037	C5H9NO3	14	N-Acetyl-beta-alanine	8	Central	KEGG_Metacyc	-0.123467	-7.91057	-0.203289	nFla'nFlaB'PQC'UI'UIB	N-Acetyl-beta-alanine	0	bp			x-H2OxNa+	0.54	0.54	12000000	pos233	0		H	posnegpos	24	2761178	3.19494e+06	3.06599e+06	2.53832e+06	3302760	8792737	5437889	8733329	9859713	10400000	12000000	5.86229e+06	3463110	6729807	3757527	3.6852e+06	1.5635e+06	3.40073e+06	2.47977e+06	8.17008e+06	9523781	5.23224e+06	8.2175e+06
324.153	21.2623	C12H24N2O8	1	Procollagen 5-(D-galactosyloxy)-L-lysine	7	0	KEGG_HMDB	0.344345	33.2629		nFla'nFlaB'PQC'UI'UIB	Procollagen 5-(D-galactosyloxy)-L-lysine	0	bp		0.3	xO18xK+xNa+x-H2OxC13	0.13	0.24	11900000	pos234	0		H	posneg	24	9144265	7533597	7.81335e+06	6923748	9555961	6395917	6291447	6752446	7.60746e+06	9941725	11900000	9410664	9228124	9804675	8588264	5.53313e+06	9924914	7.7158e+06	9472316	6.88147e+06	9385031	6787261	8.04009e+06
335.903	1.92884				0.2						nFla'nFlaB'UI'UIB		0	bp				0.89	0.89	11800000	neg48	0			neg	24	7083062	6635387	11800000	7.90137e+06	4.48571e+06	5.52567e+06	11800000	3651116	6485893	3.12896e+06	112599	4584550	4.17149e+06	3.18747e+06	11600000	5.08499e+06	6.94863e+06	5.14773e+06	3065090	5.05252e+06	2.86062e+06	9633811	7560009
406.037	10.2814				0.2						nFla'nFlaB'UI'UIB		0	bp				0.57	0.57	11800000	neg47	0			neg	23	10000000	9910875	11100000	7368143	8936836	10900000	11800000	9423400	10100000	8557362	0	9489604	8998938	8696840	10500000	9444027	10300000	9597452	8962141	9792414	9033347	10600000	10900000
768.588	3.79632										nFla'nFlaB'PQC'UI'UIB		0	bp				0.64	0.64	11800000	pos235	0			pos	24	5660990	7139826	5.20248e+06	9372343	5.66281e+06	6398988	5475161	4547573	5166708	5231485	11800000	4.63022e+06	3.95026e+06	3803611	3.51904e+06	8794140	9571932	9622978	9138322	11500000	11800000	9893377	10700000
109.909	14.5925										nFla'nFlaB'PQC'UI'UIB		0	bp				0.69	0.69	11700000	neg50	0			neg	24	5342264	7.21893e+06	10900000	10100000	4.91612e+06	4088102	9700479	4.41439e+06	7679090	3.60121e+06	16947.5	5334812	7.20251e+06	6242272	11700000	5.78008e+06	5.09872e+06	3.83736e+06	9889116	6.2373e+06	2275721	5.50266e+06	10900000
136.037	12.8994	C4H8O5	2	[FA trihydroxy(4:0)] 2,3,4-trihydroxy-butanoic acid	8	Central	KEGG_Metacyc_Lipidmaps_HMDB	0.250778	-20.5228	0.412246	nFla'nFlaB'PQC'UI'UIB	[FA trihydroxy(4:0)] 2,3,4-trihydroxy-butanoic acid	0	bp		0.1	xC13xO18	0.23	0.23	11500000	neg51	0		H	neg	24	6062117	7.33719e+06	7.55996e+06	8973720	8761592	8754901	6.66513e+06	8732498	10400000	8701342	11500000	8930261	7.9166e+06	8580983	6001473	7.21154e+06	6809358	8812179	8706110	6999540	5947102	5663268	7.56571e+06
229.939	31.5103										nFla'nFlaB'PQC'UI'UIB		0	bp				0.15	0.79	11500000	neg49	0			neg	24	1.91741e+06	3.33035e+06	4.6891e+06	8325893	3.09214e+06	2.07328e+06	3505832	3.48356e+06	6.97069e+06	2.38069e+06	6.93759e+06	6082203	5.29435e+06	5239122	4759482	5111708	3.05963e+06	2.70772e+06	11400000	5721971	1.96866e+06	1.92824e+06	11500000
233.07	10.8343							3.955			nFla'nFlaB'PQC'UI'UIB		0	bp				0.4	0.4	11400000	pos237	0			pos	24	7463812	7776789	6.83948e+06	8872359	9690863	8996021	6.46306e+06	11300000	8176523	11400000	3.18488e+06	10000000	8991190	10100000	5.88478e+06	10300000	7.97339e+06	9080586	9074898	8.22052e+06	9344997	7163889	8.08286e+06
226.107	15.0441	C9H14N4O3	3	Carnosine	10	Central	KEGG_Metacyc_HMDB	0.0130043	0.293775	0.0284119	nFla'nFlaB'PQC'UI'UIB	Carnosine	0	bp		-0.1	xK+xC13	0.14	0.27	11300000	pos241	0		H	pos	24	6.19308e+06	5778544	8712742	9855722	6.20893e+06	9215865	9111242	8.05113e+06	10900000	8720548	8438565	11300000	8538855	8223469	9599732	9575656	9448150	10500000	5.29525e+06	9654491	9043122	10400000	7753243
299.283	5.9359		0		0.2			0.944451	#N/A	1.01205	nFla'nFlaB'PQC'UI'UIB	[FA (16:2)] N-hexadecyl-ethanolamine	0	bp			xNa+x-H2OxNa+	0.47	0.47	11300000	pos238	0		H	pospos	24	3.09031e+06	7.14034e+06	3.89916e+06	6.88777e+06	6463449	6.09991e+06	4.1929e+06	5331574	5600268	7.13799e+06	7.65586e+06	11300000	2.9051e+06	10500000	5.15015e+06	6030667	3.62883e+06	5.11942e+06	6.63396e+06	7148713	8329063	6.25899e+06	7753966
793.579	3.38013										nFla'nFlaB'PQC'UI'UIB		0	bp				0.25	0.25	11300000	pos240	0			pos	24	5984129	6544004	6212961	7133775	8168267	6.95443e+06	6486907	10600000	8965722	8794012	11300000	7.31772e+06	8187183	7.42653e+06	5887571	9624758	7147943	9409803	9075717	7619868	8.12581e+06	6.89587e+06	7840576
614.397	5.21745	C40H54O5	4	[PR] 4-Hydroxymytiloxanthin	7	0	Lipidmaps	-0.461665	23.3342	0.61256	nFla'nFlaB'PQC'UI'UIB	[PR] 4-Hydroxymytiloxanthin	0	bp		-6.8	xC13xNa+	0.6	0.71	11200000	pos244	0		H	pos	24	1.48166e+06	1.44362e+06	860763	702431	1.40192e+06	1444713	1.45797e+06	1.47758e+06	1.04247e+06	1.26784e+06	11200000	4581204	3.66695e+06	4.64385e+06	3.21173e+06	589561	3.23351e+06	1.2209e+06	1.34336e+06	1.4128e+06	2.07705e+06	1.12296e+06	1.48274e+06
249.044	12.8518										nFla'nFlaB'UI'UIB		0	bp				0.62	0.62	11200000	pos242	0			pos	23	5.35295e+06	5.03972e+06	7755698	6.83586e+06	6251884	5.41394e+06	11200000	4747251	4.30526e+06	4943100	0	4.26322e+06	5773052	4.53415e+06	7066667	6675536	6.99173e+06	4829386	3.60373e+06	3363509	3.15778e+06	7929497	5.82388e+06
336.228	3.69074		0		0.1			0.41229	#N/A		nFla'nFlaB'UI'UIB	FA hydroxy(18:1)]	0	bp	xNa+			0.67	0.67	11200000	pos243	0		Na	posneg	23	7.79479e+06	8087191	9042864	8911113	6592795	5969233	11200000	6.04866e+06	6178329	5401685	0	6876143	4922971	6.25233e+06	10600000	6807343	7.35694e+06	6.36667e+06	7.19887e+06	6.58073e+06	5.0689e+06	8910722	7885649
295.911	4.40238				0.2						nFla'nFlaB'UI'UIB		0	bp				0.76	0.76	11100000	neg52	0			neg	23	7.43061e+06	7.64185e+06	9742453	7516252	5.12978e+06	6498016	10700000	4463383	6.67316e+06	3.99569e+06	0	5525589	5138214	4.20667e+06	11100000	5.46782e+06	7225214	5830395	3.92351e+06	5.8792e+06	3.91853e+06	9017880	7.80956e+06
680.062	15.6542										nFla'nFlaB'PQC'UI'UIB		0	bp				0.3	0.41	11100000	pos245	0			pos	24	7657568	7.97194e+06	7854220	5373646	5.243e+06	6.96057e+06	2273845	6.39427e+06	5932610	5.29906e+06	3.74859e+06	7.19747e+06	6.85117e+06	8.08447e+06	9382307	4273872	5942412	9881857	11100000	7335443	6.85251e+06	5.39037e+06	7724388
649.637	7.70423	C42H83NO3	3	[SP (24:0)] N-(tetracosanoyl)-sphing-4-enine	7	0	KEGG_Lipidmaps_HMDB	-0.0703766	48.0805		nFla'nFlaB'PQC'UI'UIB	[SP (24:0)] N-(tetracosanoyl)-sphing-4-enine	0	bp		1.7	xNa+xC13	0.53	0.53	10900000	pos246	0		H	pos	24	4135190	3.71048e+06	3.28739e+06	3827637	4.07843e+06	4144365	3.26296e+06	3.90723e+06	4.02927e+06	4478968	10900000	4845275	3.84898e+06	5.04738e+06	3.54982e+06	5.6605e+06	3392060	4.04895e+06	5301066	4251858	5707797	3612720	3.93775e+06
123.975	8.78296										nFla'nFlaB'PQC'UI'UIB		0	bp				0.56	0.56	10900000	neg53	0			neg	24	9584668	8742587	9778124	9509060	8618679	9101478	10900000	8610408	10000000	9174600	40340.4	9762942	9362078	9409541	10600000	10100000	10200000	9789739	9066034	9815532	9233024	10600000	9964176
227.189	3.89087		0		0.2			-0.0843959	#N/A		nFla'nFlaB'PQC'UI'UIB	FA (13:2) tridecadienoic acid	0	bp				0.33	0.45	10800000	pos247	0		NH3	posneg	24	8589685	3.79705e+06	4.85899e+06	6.18061e+06	5709100	5385083	5.1126e+06	4581157	4347012	5315665	10800000	8011717	5.74542e+06	5.68902e+06	5343433	6982188	6232649	4.45231e+06	5.35854e+06	5.39512e+06	3.49962e+06	3124473	9028863
318.888	11.0532										nFla'nFlaB'UI'UIB		0	bp				0.58	0.58	10800000	pos248	0			pos	23	6470181	4.48728e+06	4729599	5245756	7.04599e+06	3.35117e+06	10300000	10800000	9381157	7859412	0	8.06608e+06	8.06954e+06	8043545	5682234	9977376	5.12652e+06	4.1655e+06	9808603	10800000	4543735	9082468	6100594
295.911	3.98141				0.2						nFla'nFlaB'UI'UIB		0	bp				0.78	0.78	10700000	neg55	0			neg	23	7116810	6.77969e+06	9767144	7.88284e+06	4713223	6032616	10700000	4237107	6394162	3.67632e+06	0	5.2825e+06	4.68124e+06	3789284	10600000	5390648	6.73479e+06	5350049	3.80313e+06	5599476	3.64511e+06	9008395	7402273
429.863	15.7949										nFla'nFlaB'PQC'UI'UIB		0	bp			xNa+	0.55	0.55	10700000	neg54	0			neg	24	10100000	6561721	4.69073e+06	3217267	7.78903e+06	6.74279e+06	5.38091e+06	6.57279e+06	3.69156e+06	10000000	225548	7.01787e+06	7920436	7.95297e+06	6702381	3.83162e+06	8886006	7189552	3.61482e+06	4.31692e+06	10700000	6.65532e+06	2.31684e+06
677.5	3.87857		0		0.2			0.457493	#N/A	0.473829	nFla'nFlaB'PQC'UI'UIB	PC(28:0)	0	bp				0.09	0.42	10700000	pos250	0		H	pos	24	3.09194e+06	8030767	4.1697e+06	3.80207e+06	4.04555e+06	4564861	6.12529e+06	7.3218e+06	4.00994e+06	3.56253e+06	10700000	10100000	10500000	10200000	8424929	6.17096e+06	10600000	7331427	7588076	6.80592e+06	8.00211e+06	5.81483e+06	7116368
743.587	3.73561		0		0.2			2.27399	#N/A		nFla'nFlaB'PQC'UI'UIB	[PR] Coenzyme Q8	0	bp				0.37	0.37	10700000	pos249	0		NH3	pos	24	10000000	9540867	8789920	9445097	10700000	7444471	6047544	9196562	10000000	9099270	6.72542e+06	5054734	10500000	5340283	4723596	10100000	8869866	9768810	8944298	9638077	10400000	9732125	9976888
751.553	3.71266	C43H78NO7P	19	PE(O-38:5)	8	Central	KEGG_Lipidmaps_HMDB	1.28014	-7.73935	1.3139	nFla'nFlaB'PQC'UI'UIB	PE(O-38:5)	0	bp				0.11	0.18	10600000	pos251	0		H	posposneg	24	8625247	9250918	9269140	8594722	8.18346e+06	9123670	7323522	8326590	8645619	9089672	10400000	8443373	8530312	8696646	7867828	10600000	6781076	9660603	9765122	9223210	9873148	8586585	8828141
859.536	3.35157		0		0.1			-0.75031	#N/A	-0.761913	nFla'nFlaB'PQC'UI'UIB	PS(42:8)	0	bp	xNa+	1.2	xC13	0.21	0.21	10500000	pos252	0		H	pos	24	7.55303e+06	7931556	6768178	6.69901e+06	7.62058e+06	9659708	6180935	8002370	9070150	8978307	10500000	7.64083e+06	9222205	7416740	6132263	5.89791e+06	7.16807e+06	5815916	6297379	6846918	7268908	6817544	6.53694e+06
412.259	3.55698		0		0.1			0.0604766	#N/A		nFla'nFlaB'PQC'UI'UIB	Bis(2-ethylhexyl)phthalate	0	bp	xNa+	4.7	xC13	0.69	0.69	10400000	pos254	0		Na	pos	24	7833089	7887311	9193106	7.83629e+06	6378576	7.30574e+06	9258495	6178983	6.51852e+06	5.80964e+06	88227.2	6.54681e+06	5.27747e+06	4.74568e+06	10400000	5.88115e+06	9843829	8487695	6.1963e+06	6909971	4.24456e+06	7787863	8695586
583.082	16.5034	C15H24N2O17P2	3	UDP-glucose	10	Central	KEGG_Metacyc_HMDB	0.876332	0.516239		nFla'nFlaB'PQC'UI'UIB	UDP-glucose	0	bp		2.3	xC13x-NH3xO18	0.1	0.14	10300000	pos259	0		NH3	posneg	24	7515335	7.97973e+06	8775818	7717074	9102144	6.10859e+06	6186007	6201937	6884247	7295839	10300000	8895606	8454510	8328905	8.15744e+06	6753052	9014978	8753770	9548537	5485422	7200081	6.0896e+06	7.14227e+06
901.568	3.42501	C45H86NO13P	2	[PI(36:0)	8	Central	Lipidmaps	2.66093	-16.7879	-0.0729103	nFla'nFlaB'PQC'UI'UIB	[PI(36:0)	0	bp		-1.8	xC13	0.32	0.32	10300000	pos258	0		Na	pos	24	5069430	5679780	4.20332e+06	5.34321e+06	6458303	5372933	3506577	6.42833e+06	5475057	6356966	10300000	6220017	6.4081e+06	7.55258e+06	4.20915e+06	5.085e+06	5.05542e+06	5.73606e+06	6.07986e+06	5.54536e+06	7342008	4.21725e+06	4629586
219.111	8.08647		0		0.2			0.122274	#N/A	0.0979373	nFla'nFlaB'UI'UIB	Pantothenate	0	bp			xNa+	1.12	1.12	10300000	pos257	0		H	pos	24	1.72285e+06	1.70581e+06	1.59153e+06	1.32979e+06	2.25585e+06	2.22125e+06	1.32877e+06	2.32107e+06	2.74176e+06	2.61465e+06	10300000	2189174	1081543	2.39532e+06	1.29501e+06	2.57203e+06	1.04551e+06	2.8512e+06	2.47008e+06	2698359	3.26771e+06	1.64385e+06	2.88954e+06
89.0841	16.2246	C4H11NO	1	N-dimethylethanolamine	7	0	Metacyc	0.68074	40.2378	0.744449	nFla'nFlaB'PQC'UI'UIB	N-dimethylethanolamine	0	bp				0.11	0.72	10200000	pos260	0		H	pos	24	4.33762e+06	5010748	5.94983e+06	4.26683e+06	4.14149e+06	4.77123e+06	2.93536e+06	4605223	2.86615e+06	6.45558e+06	5.48198e+06	4.7556e+06	4434056	4.1157e+06	4998174	5.08847e+06	10200000	6125493	608025	7537144	8735923	5.83733e+06	769826
250.029	15.1033				0.1			-3.01264			nFla'nFlaB'PQC'UI'UIB		0	bp	x2-mer	C5	xC13xS34x2-merxNa+	0.64	0.64	10200000	neg56	0			neg	24	1.65536e+06	1.64661e+06	2.94212e+06	2.18229e+06	1.70046e+06	3426184	3012444	2.44458e+06	3.76789e+06	2.79182e+06	10200000	3874660	2.92087e+06	3.12817e+06	3.76916e+06	2967998	3.5282e+06	4515759	2742233	3290942	3.88996e+06	3474665	3.38564e+06
296.159	12.5237							-3.58098			PQC'UIB		0	bp				0.08	1.78	10200000	pos261	0			pos	22	115886	1165301	310167	415118	10200000	0	371899	471481	238113	91842.2	1.03914e+06	953033	876380	861309	1.01941e+06	248088	144054	286312	0	375385	67083.9	443498	69722
133.074	7.15965	C5H11NO3	4	3-nitro-2-pentanol	7	0	Metacyc	0.144722	9.90876	0.105636	nFla'nFlaB'PQC'UI'UIB	3-nitro-2-pentanol	0	bp				0.13	0.39	10100000	pos262	0		H	pos	24	9735932	9432667	10100000	8785449	6.4286e+06	6.63509e+06	3.67933e+06	6906722	5502241	2.3314e+06	4.61951e+06	4659319	5183026	4.55582e+06	6.10705e+06	4.19091e+06	3055589	5.78956e+06	6686559	4.05144e+06	4.65348e+06	2.69931e+06	4.42094e+06
762.591	4.05036				0.1						nFla'nFlaB'PQC'UI'UIB		0	bp	x-FA			0.08	0.13	10100000	pos263	0			pos	24	9926227	8896471	9057434	7118366	10100000	8594266	7.34651e+06	8372228	8716740	9380108	9819905	8346990	8561298	8390157	7940787	8168995	8658318	8737670	8783219	8629219	8542583	8126783	8424130
196.058	14.5187	C6H12O7	11	D-Gluconic acid	10	Central	KEGG_Metacyc_HMDB	-0.181609	2.3977	-0.217297	nFla'nFlaB'PQC'UI'UIB	D-Gluconic acid	0	bp		-0.2	xO18xC13	0.53	0.68	9927313	neg59	0		H	neg	24	3.2301e+06	2680449	1.76496e+06	2.11546e+06	3.99654e+06	5307179	1.58771e+06	4.93307e+06	3.85753e+06	6718686	9927313	5.94108e+06	4.27144e+06	5456490	1.98442e+06	3.28723e+06	4.92596e+06	7.79542e+06	3.12807e+06	4.39372e+06	8608286	2.88781e+06	1977870
230.163	4.78652		0		#N/A			-0.401651	#N/A	-0.419662	nFla'nFlaB'PQC'UI'UIB	Ile-Val	0	bp				0.7	0.7	9922614	pos264	0		H	posneg	24	3.00996e+06	2.95043e+06	1.60596e+06	1.84345e+06	2.51018e+06	2.32103e+06	2.04368e+06	2.74749e+06	2.06719e+06	3.3184e+06	9922614	2.96336e+06	3.13364e+06	4543483	2.0056e+06	2.7977e+06	3.02911e+06	3.73102e+06	3.94041e+06	2.23152e+06	4148796	2.58001e+06	2.30896e+06
283.324	7.20231	C19H41N	1	CTAB	7	0	KEGG_Metacyc	-0.156343	43.7261	-0.155074	nFla'nFlaB'PQC'UI	CTAB	0	bp				0.09	1.32	9872115	pos267	0		H	pos	24	1.93625e+06	994580	757553	1.1876e+06	1.58392e+06	705609	1.13402e+06	1.25509e+06	1571093	758572	1055494	1.1756e+06	1.14386e+06	1.24477e+06	1.35749e+06	1.15219e+06	592665	1164240	1.50575e+06	1.55079e+06	9872115	993020	1.27417e+06
446.061	16.053	C11H20N4O11P2	1	CDP-ethanolamine	8	Central	KEGG_Metacyc_HMDB	0.355637	0	-1.96511	nFla'nFlaB'PQC'UI'UIB	CDP-ethanolamine	0	bp		1.3	xK+xC13xO18	0.2	0.2	9869785	pos268	0		H	posneg	24	5.51438e+06	5953106	7482898	6708043	6.4609e+06	6143589	6.27824e+06	5956421	7637013	6.61213e+06	9869785	7.02886e+06	6715572	6.25878e+06	6641430	5055514	5.58242e+06	5.99469e+06	7387971	6610580	5829245	5783258	8471089
814.692	27.799		0		#N/A			-1.07409	#N/A		nFla'nFlaB'PQC'UI'UIB	SM(d18:0/24:1(15Z))	0	bp		-6	xNa+xC13	0.06	0.27	9867827	pos269	0		H	pos	24	5.44224e+06	6.33921e+06	8007452	4.38971e+06	8373668	4640160	3.94405e+06	5.08012e+06	5.31247e+06	5.81471e+06	8590443	8836210	8764572	9867827	9691685	4883070	8683375	8157684	5.67444e+06	4186214	5590491	4396593	4.45798e+06
117.079	13.1082	C5H11NO2	17	D-Norvaline	7	0	KEGG_Metacyc	0.104673	21.6951	0.15247	nFla'nFlaB'PQC'UI'UIB	D-Norvaline	0	bp			x-H2O	0.09	0.11	9808765	pos270	0		H	pos	24	6191729	6.76662e+06	7.364e+06	7497146	7.35849e+06	8548757	8100440	8.05166e+06	8597272	7560262	9335049	8869176	7.81625e+06	8170976	7.41445e+06	8561778	7.74832e+06	9808765	7795251	8078053	7834543	8597348	7.8947e+06
757.559	5.37055							-3.62225			nFla'nFlaB'PQC'UI'UIB		0	bp				0.2	0.34	9775740	pos265	0			pos	24	3.21534e+06	4809582	3.95586e+06	4638421	4.95794e+06	3.38511e+06	3.24026e+06	3.62961e+06	3226832	5375900	9775740	7631592	5798710	8.13904e+06	6773502	3.9194e+06	4.94098e+06	5136762	5657634	2.35886e+06	1719284	2.66415e+06	3.73324e+06
145.11	27.7144		0		#N/A			-0.39667	#N/A	-0.425979	nFla'nFlaB'PQC'UI'UIB	Acetylcholine	0	bp		0.9	x-H2OxACNxC13	0.05	0.07	9761032	pos271	0		H	pos	24	9643120	8736778	8.38841e+06	8.26537e+06	9084151	8928891	9573607	8957085	8.16215e+06	8839421	9750979	8803947	9761032	9582514	8940608	9294651	9416810	9677239	8582160	9077702	9665542	8532266	7952897
189.947	31.2136										nFla'nFlaB'PQC'UI'UIB		0	bp				0.12	0.73	9751016	neg57	0			neg	24	1.89433e+06	3.23142e+06	4.31343e+06	7.11663e+06	2.91261e+06	2.04144e+06	3310490	3.25717e+06	6.21934e+06	2.30985e+06	6.10434e+06	5.16269e+06	5.26331e+06	5.03719e+06	4425630	4614203	2952995	2.56316e+06	9751016	5.07893e+06	1953089	1.88423e+06	9681591
835.606	4.01326	C46H88NO8P	36	PC(38:2)	8	Central	0	-1.17763	0.330521		nFla'nFlaB'PQC'UI'UIB	PC(38:2)	0	bp				0.04	0.48	9750919	pos272	0		Na	pos	24	8254022	8613476	9750919	6901160	8145556	3428564	3.52563e+06	9015420	4.92189e+06	9361270	8730743	8714453	8349492	8.00781e+06	8500478	7.21728e+06	9578028	8720048	8924244	9393209	9474859	8236935	9492276
769.596	3.66333		0		0.1			-0.131478	#N/A		nFla'nFlaB'PQC'UI'UIB	PC(34:2)	0	bp	xC13	5.1	xC13	0.23	0.36	9686367	pos273	0		Na	pos	24	8.32641e+06	8022129	7711303	7283275	9250079	9055508	7474014	8714857	4.73623e+06	7814567	7.54409e+06	7.0558e+06	8.30414e+06	4.35874e+06	8292587	7.11617e+06	7616628	8308069	9686367	4363745	4756478	4222735	8700505
204.09	11.0655		0		0.4			0.707684	#N/A	0.788134	nFla'nFlaB'UI'UIB	L-Tryptophan	0	bp			x-NH3	0.9	0.9	9682562	pos253	0		H	pos	24	1.35274e+06	1.65153e+06	1.36399e+06	1.32914e+06	2.46422e+06	1.55421e+06	1.14526e+06	2.05574e+06	1.81635e+06	2.69798e+06	9682562	2604986	2.42608e+06	3.00519e+06	1.13985e+06	2.48572e+06	2.27922e+06	2.97948e+06	2.73476e+06	1.79773e+06	2275956	1.28134e+06	2.14518e+06
342.138	21.068				0.4						nFla'nFlaB'UI'UIB		0	bp				1.18	1.18	9648169	pos274	0			pos	23	5.09062e+06	4.20693e+06	9648169	4.03368e+06	2.05866e+06	2842773	7.51318e+06	1.77667e+06	3.48252e+06	1.41607e+06	0	2.13336e+06	1.79756e+06	1.51821e+06	8449442	1945860	2.7967e+06	2.33723e+06	1.86464e+06	2.53909e+06	2.00137e+06	7.40434e+06	3778715
113.059	15.0373		0		#N/A			0.459809	#N/A		nFla'nFlaB'PQC'UI'UIB	Creatinine	0	bp			xK+	0.52	0.72	9632892	pos275	0		H	posneg	24	1.10615e+06	2.01136e+06	2117087	5.70848e+06	2.48575e+06	1.79049e+06	1.49786e+06	2.9172e+06	5.42831e+06	2.53339e+06	9632892	5186564	4.85481e+06	4754118	1.97491e+06	3.47914e+06	1.86633e+06	3.27499e+06	6.74591e+06	4.38383e+06	2.35928e+06	1.34828e+06	7188153
229.939	30.5315				0.2						nFla'nFlaB'PQC'UI		0	bp				0.18	0.85	9588665	neg58	0			neg	24	1.38457e+06	2.56561e+06	3459266	6.4136e+06	2.32443e+06	1.55477e+06	2.57349e+06	2.63509e+06	5496094	1.73865e+06	5.56238e+06	4.71069e+06	4.20218e+06	4.00063e+06	3.50961e+06	3.79599e+06	2.23837e+06	1.9478e+06	9377113	4379096	1.49063e+06	1.44564e+06	9588665
157.147	4.00708	C9H16O	22	FA (9:1) nonenal	8	Central	Metacyc_Lipidmaps	-0.100625	-3.35775		PQC'UI'UIB	FA (9:1) nonenal	0	bp				0.05	0.88	9506938	pos277	0		NH3	pos	24	2.01288e+06	2.45143e+06	2.10248e+06	9506938	2.36047e+06	503509	4.18951e+06	1.92405e+06	6.93663e+06	1.95904e+06	4193367	4.24239e+06	4297447	4.26274e+06	4.72388e+06	8.35773e+06	3.15728e+06	1.75657e+06	2.69461e+06	7.84499e+06	3.17507e+06	2.88452e+06	1.62695e+06
732.989	14.4096										nFla'nFlaB'UI'UIB		0	bp			xCl37	0.57	0.57	9416835	pos278	0			pos	23	5078279	6308206	4.92269e+06	7936128	4.80583e+06	4.03853e+06	4.09885e+06	5.45584e+06	7.87917e+06	4.33212e+06	0	6168961	6.58779e+06	6.51989e+06	5047794	6232162	5513131	5.16548e+06	7772674	6.57579e+06	3271510	4.148e+06	9416835
299.283	5.5878		0		0.2			0.932088	#N/A	0.998943	nFla'nFlaB'PQC'UI'UIB	[FA (16:2)] N-hexadecyl-ethanolamine	0	bp				0.17	0.38	9398279	pos279	0		H	pos	24	7.66095e+06	6497103	6.2378e+06	2.73537e+06	9398279	5985015	4682320	6.02139e+06	7984265	9370063	3.86077e+06	3150358	2.51354e+06	3.83812e+06	3.79731e+06	4009562	3.40375e+06	5.11942e+06	6.86574e+06	7148713	8329063	6.25899e+06	6647943
1008.38	16.7058										nFla'nFlaB'PQC'UI'UIB		0	bp		C40	x2+xC13xK+xNa+	0.23	0.23	9358361	pos266	0			posneg	24	4.31403e+06	5094277	5912746	5145052	6118640	4.17743e+06	4380041	4.61297e+06	5709706	5.2999e+06	9358361	6547694	5.93525e+06	5835798	5702968	4.50811e+06	5805274	5.54088e+06	6.69448e+06	4.6642e+06	4845207	4343434	7071765
132.024	10.9608		0		0.1			-0.493662	#N/A		nFla'nFlaB'UI'UIB	THTC	0	bp	x-NH3			0.9	0.9	9300402	pos280	0		H	pos	24	1.189e+06	1.57419e+06	1.01876e+06	1.31155e+06	2.63759e+06	1.4229e+06	1.02384e+06	1.90868e+06	1.36281e+06	2.60696e+06	9300402	2.72012e+06	2.0933e+06	2.94765e+06	1.04142e+06	2.39794e+06	2.15436e+06	2.62896e+06	1.82795e+06	1.58683e+06	2.04756e+06	1.07847e+06	1.52793e+06
813.621	3.61008				0.2			-4.97158			nFla'nFlaB'PQC'UI'UIB		0	bp		C41	xC13	0.05	0.19	9188869	pos282	0			pos	24	7958291	8866755	7.14906e+06	7.53123e+06	8.30894e+06	6.87285e+06	6.93694e+06	9188869	8754847	8963138	6714396	6.80534e+06	6348810	6836189	6.06395e+06	9099454	6742925	6132348	8057557	8049604	8536171	8454715	7376303
307.084	16.6092	C18H13NO4	1	Stealthin C	7	0	KEGG	-1.00456	49.6697	1.11212	nFla'nFlaB'PQC'UI'UIB	Stealthin C	0	bp				0.31	0.37	9082502	pos255	0		H	posneg	24	4.73381e+06	5263647	7.8989e+06	7.03967e+06	5865682	2.90266e+06	3.55605e+06	2.89717e+06	5.61172e+06	3.42989e+06	9082502	6147398	4.45193e+06	4.7278e+06	5.40963e+06	4.80255e+06	3.85136e+06	4300996	6.6083e+06	4.00278e+06	3.12909e+06	2892926	6274944
225.173	3.69999	C13H20O2	3	4-Heptyloxyphenol	7	0	KEGG	-0.252074	-8.29943		nFla'nFlaB'PQC'UI'UIB	4-Heptyloxyphenol	0	bp			x-NH3	0.19	0.36	9046052	pos283	0		NH3	pos	24	7.37466e+06	4.00737e+06	5759712	5.78831e+06	5443706	6066947	4.44743e+06	3.93144e+06	3.99417e+06	6884645	9046052	7155340	5871943	6.83876e+06	5.78719e+06	6594544	7515256	5871482	2.8279e+06	7115378	4591822	4510704	6.82846e+06
174.05	12.5504	C5H12O5	4	D-Arabitol	8	Central	KEGG_Metacyc_HMDB	0.343376	-4.31154		nFla'nFlaB'PQC'UI'UIB	D-Arabitol	0	bp		2.1	xC13	0.29	0.29	9026624	pos284	0		Na	pos	24	8101375	7621371	8.21295e+06	7.59453e+06	7.24449e+06	7988973	7693490	7.95979e+06	8475275	7117264	3.74114e+06	9026624	7391696	7.33953e+06	8575180	8015932	8589343	8811056	8002260	8.14753e+06	7826683	7.52802e+06	7713700
240.147	9.03248	C12H20N2O3	2	Slaframine	7	0	KEGG	-0.689936	11.5563	-0.72914	nFla'nFlaB'PQC'UI'UIB	Slaframine	0	bp		0.7	xC13	0.07	0.19	8999083	pos285	0		H	pos	24	5628316	5213323	6.20526e+06	5910579	5907671	6.01476e+06	4935806	6.14222e+06	7.91673e+06	6.72209e+06	6517480	6312578	6511546	6.7168e+06	5645903	6260041	5971364	8999083	7664314	6575809	6017014	6.1961e+06	6.64299e+06
829.561	3.57834		0		0.1			-1.20538	#N/A	1.74356	nFla'nFlaB'PQC'UI'UIB	PC(40:8)	0	bp	xNa+	2	xC13	0.21	0.39	8939382	pos286	0		H	pos	24	8939382	7.85015e+06	7782500	6401058	7062358	7.27245e+06	8436975	7.10724e+06	6349113	5912168	4888384	7993786	7569571	6260577	8712244	4.48641e+06	6.49205e+06	6423101	2.42918e+06	5693883	6010333	6412195	7.26297e+06
140.059	9.33209	C6H8N2O2	7	Methylimidazoleacetic acid	8	Central	KEGG_HMDB	-0.152318	-8.85799	-0.149013	nFla'nFlaB'PQC'UI'UIB	Methylimidazoleacetic acid	0	bp				0.15	0.18	8921407	pos287	0		H	pos	24	5224394	4.81421e+06	6469021	6.31144e+06	5.95411e+06	8771042	5.84769e+06	6682841	8921407	7.00865e+06	6.87376e+06	5223343	5.05566e+06	5.13244e+06	4935212	5.2407e+06	3825969	5942249	4.82115e+06	6349818	5982923	5411716	6196023
886.557	3.40656	C47H83O13P	26	PI(38:4)	8	Central	0	-0.179445	-17.4206		nFla'nFlaB'PQC'UI'UIB	PI(38:4)	0	bp		0	x-NH3xC13xNa+	0.15	0.15	8875571	neg60	0		H	neg	24	6828893	7.49202e+06	6742517	7.37715e+06	7.77752e+06	7.61215e+06	6826971	7510563	7384058	7.7808e+06	7.76627e+06	5885521	6992440	6910289	5273751	8875571	7179688	8511412	8.00902e+06	7.80769e+06	8054686	8332355	7300845
131.095	11.2583	C6H13NO2	12	(3R)-beta-Leucine	8	Central	KEGG_Metacyc_HMDB	-0.0717474	12.5796	-0.0561568	nFla'nFlaB'PQC'UI'UIB	(3R)-beta-Leucine	0	bp		1.2	xC13	0.1	0.2	8869639	pos289	0		H	pos	24	4.76693e+06	4936583	5599599	6.14165e+06	5835519	7055204	5.22749e+06	6.03175e+06	8869639	6.85895e+06	6.8592e+06	7.79585e+06	7.56468e+06	7401539	6035553	7.71118e+06	7170179	8140633	8.14757e+06	6.14882e+06	6.74413e+06	5.57018e+06	6916153
811.693	7.45271							3.70194			nFla'nFlaB'PQC'UI'UIB		0	bp				0.57	0.57	8864496	pos276	0			pos	24	3.07169e+06	2.98381e+06	2.56391e+06	2815144	3.12419e+06	3.1056e+06	2.05844e+06	3.4962e+06	3.22786e+06	4485777	8864496	3.63448e+06	3372230	3.64323e+06	2.52707e+06	3.41363e+06	2.85806e+06	3.17242e+06	3603862	3.3336e+06	4.14077e+06	2688238	3.03942e+06
702.569	27.59		0		#N/A			2.48463	#N/A		nFla'nFlaB'PQC'UI'UIB	SM(d34:1)	0	bp		4.4	xNa+xC13	0.42	0.42	8815208	pos290	0		H	pos	24	3.14356e+06	4.23616e+06	4.92157e+06	1.78103e+06	6012063	2.26813e+06	1.68776e+06	2.42383e+06	2.53437e+06	3.12337e+06	6371426	1953584	6270934	8.03975e+06	8815208	2.38011e+06	4.66548e+06	4928811	2685051	1.96452e+06	2.32838e+06	1.87371e+06	2.05797e+06
607.082	15.0886	C17H27N3O17P2	3	UDP-N-acetyl-D-galactosamine	10	Central	KEGG_Metacyc_Lipidmaps_HMDB	0.773254	-0.122292		nFla'nFlaB'PQC'UI'UIB	UDP-N-acetyl-D-galactosamine	0	bp		2.5	xK+xNH3xC13	0.41	0.41	8728365	pos291	0		H	pos	24	3.68517e+06	4377468	5.40754e+06	4.6553e+06	5126258	3.65524e+06	4.44756e+06	3633485	4388162	3.73688e+06	8728365	4.55802e+06	3.75048e+06	4.04184e+06	4.1586e+06	3.68306e+06	3618214	3.8057e+06	3.44743e+06	3.93149e+06	4057764	4.00392e+06	3.76523e+06
205.939	15.3358										nFla'nFlaB'UI'UIB		0	bp		C5	xK+xC13x2-mer	0.57	0.57	8715542	pos292	0			pos	23	7475654	8000691	7.29142e+06	6.19242e+06	8715542	6.35393e+06	4.56463e+06	5426218	5173539	5537386	0	3088192	3359943	3192547	2.53839e+06	281692	411668	427105	316688	264369	330967	298994	145396
157.089	28.209										nFla'nFlaB'PQC'UI'UIB		0	bp		C12	xC13	0.03	0.08	8674844	pos281	0			pos	24	7.53889e+06	7.8085e+06	7531491	8058565	7.47187e+06	7809824	7763624	7791324	7987929	7149923	8108893	7.60837e+06	7817280	7618014	7706765	7841404	7.36432e+06	7.05141e+06	8292974	8.01252e+06	7.76507e+06	7.00675e+06	8674844
213.246	7.2798	C14H28	5	6Z-Tetradecene	7	0	Lipidmaps	-0.0676626	45.0534		nFla'nFlaB'PQC'UI'UIB	6Z-Tetradecene	0	bp		5.5	xC13	0.06	0.33	8673840	pos256	0		NH3	pos	24	6.82771e+06	4.34452e+06	4.47246e+06	8134343	5672888	3.06717e+06	6.68702e+06	5633352	8523119	6183301	8.13678e+06	8504479	7.32058e+06	7585519	7791263	7148812	6946869	5388708	8673840	6717663	8608637	4.13502e+06	7530000
431.273	4.40473		0		#N/A			-2.83851	#N/A	-2.94794	nFla'nFlaB'PQC'UI'UIB	Ala-Leu-Lys-Thr	0	bp				0.11	0.52	8661982	pos293	0		H	pos	24	2.76751e+06	1.98562e+06	2.2441e+06	3.0081e+06	2.86599e+06	2.10688e+06	4054998	5273949	3.70187e+06	8661982	2.7163e+06	2911974	3.18339e+06	2729513	2.33505e+06	3.23725e+06	1.24404e+06	1.46885e+06	2232539	4.93749e+06	2.26003e+06	3685622	2260595
211.845	15.6381				0.1						nFla'nFlaB'UI'UIB		0	bp	xK+		xK+	0.67	0.67	8656310	pos294	0			pos	23	7.78994e+06	5335468	2695061	2763276	6.96346e+06	7369867	3.4756e+06	6431768	2.71458e+06	8.35108e+06	0	4.04983e+06	6577600	6667321	3.31243e+06	3.88288e+06	5.61777e+06	5.95903e+06	2.94818e+06	3.61357e+06	8656310	5277302	1.87569e+06
101.993	8.30768				0.2						nFla'nFlaB'PQC'UI'UIB		0	bp				0.56	0.56	8654634	neg61	0			neg	24	5943065	6468362	7436136	7.45984e+06	5497724	5.75786e+06	7.95199e+06	6599935	6299732	5.70605e+06	237422	6.92054e+06	6.66184e+06	6.29748e+06	8654634	7146829	7.3578e+06	7327982	6470882	5853552	6.33313e+06	6.41589e+06	6362339
656.228	7.22626				0.4			-5.43949			nFla'nFlaB'UI'UIB		0	bp				0.84	0.84	8650453	pos295	0			pos	24	1.60685e+06	1.63684e+06	1.13315e+06	1.61401e+06	1.94076e+06	1.88902e+06	1345193	2.06324e+06	1.66056e+06	2.11899e+06	8650453	2.0488e+06	2.23243e+06	2.45222e+06	1.91638e+06	1.98234e+06	1.9281e+06	1.86998e+06	2224045	1894738	2.54252e+06	1.77146e+06	1.8226e+06
426.088	16.8386	C13H22N4O8S2	2	Asp-Cys-Cys-Ser	7	0	Peptides	0.558469	4.98007		nFla'nFlaB'PQC'UI'UIB	Asp-Cys-Cys-Ser	0	bp		2.1	xK+xC13xS34xNa+	0.26	0.26	8637580	pos218	0		H	posneg	24	3.41961e+06	3104358	3.22042e+06	3.77622e+06	4.13536e+06	3.57565e+06	4221949	4.89566e+06	4982680	4.24283e+06	8637580	6570793	5114597	5321421	4.82136e+06	5.65911e+06	5.81678e+06	5723830	6829615	4875787	4.19032e+06	3.4097e+06	6243152
273.18	12.8708	C11H23N5O3	1	Val-Arg	7	0	Peptides	-0.325951	-5.03659		nFla'nFlaB'PQC'UI'UIB	Val-Arg	0	bp		0.7	xC13	0.27	0.27	8511779	pos288	0		H	pos	24	4.43258e+06	4.1647e+06	3.32375e+06	3.58782e+06	5.80523e+06	4498656	3179286	5.61814e+06	3.29026e+06	5.16103e+06	7783809	6204184	5.90548e+06	5485540	3.43298e+06	7021885	7863604	8511779	6.51311e+06	3.97114e+06	4.51039e+06	5266215	3526262
203.079	11.2288		0		0.4			0.49583	#N/A	0.503582	nFla'nFlaB'UI'UIB	N2-Acetyl-L-aminoadipate	0	bp				1.06	1.06	8454825	pos296	0		H	pos	24	788589	1.10854e+06	575732	974630	2.20648e+06	1.34602e+06	531262	1681582	1.03832e+06	2.19948e+06	8454825	1.94757e+06	1.73907e+06	2.14036e+06	506084	1479332	1.21909e+06	1.74732e+06	1.48446e+06	1.01098e+06	1.742e+06	750299	1.00278e+06
188.152	20.7513	C9H20N2O2	2	N6,N6,N6-Trimethyl-L-lysine	10	Central	KEGG_Metacyc_HMDB	-0.14187	-0.245596	-0.138455	nFla'nFlaB'PQC'UI'UIB	N6,N6,N6-Trimethyl-L-lysine	0	bp		0.2	xC13	0.04	0.15	8442838	pos297	0		H	pos	24	6076957	7472377	7939655	6426555	6518486	7197739	5.5043e+06	7297966	8442838	6.70952e+06	6.96871e+06	7.58435e+06	7466426	7.44007e+06	7.7897e+06	5.49085e+06	6181490	7559492	7369873	7438217	7.38808e+06	6.95578e+06	7.93109e+06
228.147	9.14765	C11H20N2O3	3	L-isoleucyl-L-proline	7	0	HMDB	-0.410058	4.44801	-0.428918	nFla'nFlaB'PQC'UI'UIB	L-isoleucyl-L-proline	0	bp		1.7	xC13	0.1	0.13	8331455	pos299	0		H	pos	24	5.34417e+06	5.55866e+06	5.27501e+06	6.27369e+06	6384607	5826864	5652800	7.20918e+06	7473722	7.19144e+06	7.5711e+06	7064133	7870990	6.49881e+06	6098829	8331455	6.17155e+06	7393665	7574168	8.11132e+06	6.73166e+06	6218224	6635549
723.957	10.7351				0.1						nFla'nFlaB'UI'UIB		0	bp	xNa+			0.67	0.67	8282521	pos300	0			pos	23	6827794	5.9203e+06	8282521	6567966	4313246	6.96087e+06	7924341	3.81484e+06	4.89604e+06	3.87746e+06	0	5.14179e+06	4.53684e+06	3.58821e+06	7711899	5092061	5.23785e+06	7528920	3.68316e+06	5052151	4628808	6.30497e+06	6695308
289.139	17.5896	C10H19N5O5	1	Asp-Arg	7	0	Peptides	0.277324	-25.633		nFla'nFlaB'PQC'UI'UIB	Asp-Arg	0	bp				0.18	0.18	8217079	pos301	0		H	pos	24	3.86241e+06	4.72698e+06	5.01505e+06	4416528	4844754	4194777	4.01251e+06	4.6096e+06	5734118	4643616	8.21708e+06	6.69784e+06	5.94866e+06	5.58877e+06	5527315	5393959	5658255	6.00217e+06	4995909	5494175	4.93334e+06	4.34235e+06	4598115
163.967	2.83586										nFla'nFlaB'PQC'UI'UIB		0	bp				0.65	0.65	8167251	neg63	0			neg	24	6224540	5.73864e+06	8.16725e+06	6.42932e+06	5155554	5.15279e+06	8141191	4.25474e+06	6535979	3.82704e+06	105484	5272634	4471943	4214795	8098653	5174891	5.99553e+06	5.15338e+06	4.41012e+06	4919825	3.70101e+06	7.68365e+06	6886132
285.303	8.58184		0		#N/A			0.171583	#N/A	0.15638	nFla'nFlaB'PQC'UI'UIB	[SP] 1-deoxy-sphinganine	0	bp		1.4	x-H2OxC13	0.29	0.35	8143890	pos302	0		H	pos	24	6691842	7.26754e+06	6.71198e+06	5271432	8.14389e+06	5.90217e+06	5657274	7423342	7.25136e+06	7943269	7500619	7.72946e+06	3256046	7.91098e+06	6654506	7610748	3.06743e+06	5791865	5096534	6087702	7572121	5394774	5.92291e+06
236.101	12.2943	C8H13NO6	4	N-Acetyl-D-mannosaminolactone	7	0	KEGG	-0.242438	14.7831		PQC	N-Acetyl-D-mannosaminolactone	0	bp				0.07	1.79	8122020	pos303	0		NH3	pos	17	0	1025677	242388	331955	8.12202e+06	0	180467	186096	93706.8	75882.9	773825	720953	707560	675896	637705	231058	98068.7	220666	0	148224	0	0	0
183.066	15.6702		0		0.2			0.279217	#N/A	0.325918	nFla'nFlaB'PQC'UI'UIB	Choline phosphate	0	bp				0.31	0.31	8082492	pos304	0		H	pos	24	2.67798e+06	2.52691e+06	4.35498e+06	3.38909e+06	2.93701e+06	5217460	5.51046e+06	5233517	6076821	5060903	8.08249e+06	4.67312e+06	4523936	4.6145e+06	4083476	4.47075e+06	4387494	4.9286e+06	5.3433e+06	5.24069e+06	4606311	5647640	6414657
387.247	4.46914							-3.6646			nFla'nFlaB'PQC'UI'UIB		0	bp				0.1	0.48	8067308	pos305	0			pos	24	3.40041e+06	2.14729e+06	2.5167e+06	3.58888e+06	4.33515e+06	1.97695e+06	4535405	5.03067e+06	3602182	8.06731e+06	2.88907e+06	3152059	3.55961e+06	3.35912e+06	2754905	2.06788e+06	1.68291e+06	1.38963e+06	2623225	3824707	2.06004e+06	3.20994e+06	2.16643e+06
196.058	13.9055	C6H12O7	11	D-Gluconic acid	10	Central	KEGG_Metacyc_HMDB	-0.0143115	-1.92735	0.00129365	nFla'nFlaB'PQC'UI'UIB	D-Gluconic acid	0	bp		0.5	xC13xO18	0.44	0.44	8007013	neg64	0		H	neg	24	2489751	4.23346e+06	2.04925e+06	3.51735e+06	4.11668e+06	4613752	1098071	3497200	4.5575e+06	3139282	8.00701e+06	5.94326e+06	5006033	5333845	1.67829e+06	2.59567e+06	2.18039e+06	2.79025e+06	3.78683e+06	4045581	2.96903e+06	2.88781e+06	2.92908e+06
663.109	13.5185	C21H27N7O14P2	1	NAD+	8	Central	KEGG_Metacyc_HMDB	0.134475	0		nFla'nFlaB'PQC'UI'UIB	NAD+	0	bp		2.6	xNa+xO18xC13xK+	0.14	0.15	8000283	neg65	0		H	neg	24	3.73789e+06	3.64023e+06	3.71366e+06	3.79889e+06	4263046	5308744	3706852	4964199	5608257	5.44547e+06	7460325	6.57148e+06	6.19388e+06	6.30129e+06	4.95941e+06	6149027	6976938	8000283	7.05368e+06	6.01089e+06	6026325	5241188	5.5251e+06
113.993	4.7932										nFla'nFlaB'PQC'UI'UIB		0	bp		C2	xC13	0.07	0.51	7986557	neg66	0			neg	24	2.60533e+06	3850612	3.30136e+06	3.38838e+06	7986557	2.97141e+06	7899969	3.33756e+06	4.52195e+06	4956934	1.6886e+06	1.73488e+06	1.99411e+06	1.72161e+06	1.70679e+06	3.28093e+06	940515	4671922	4397143	5925182	1.76729e+06	2.11969e+06	4298032
238.142	5.28077							-5.8736			nFla'nFlaB'PQC'UI'UIB		0	bp			xNa+	0.36	0.79	7971105	pos306	0			pos	24	2.88169e+06	1854650	1.70907e+06	1.4764e+06	1.02661e+06	2.46504e+06	707056	5124027	2.9345e+06	1.45718e+06	480318	515304	426775	850918	364735	1.8081e+06	1106311	2122934	3222977	7.9711e+06	1.50979e+06	2.28176e+06	2.41983e+06
276.075	12.4781				0.1						nFla'nFlaB'PQC'UI'UIB		0	bp	xNa+	C10	xC13	0.63	0.63	7904614	pos307	0			pospos	24	7427660	4.83866e+06	7.27211e+06	4.69092e+06	3.21033e+06	5.66293e+06	7904614	2.89513e+06	4018922	2.78778e+06	923682	3.09071e+06	3.16425e+06	3.49615e+06	7.15087e+06	2.90471e+06	4.11571e+06	3.65289e+06	3.62498e+06	4555583	2.97964e+06	5540557	4380603
113.084	5.385		0		#N/A			0.389051	#N/A	0.385139	nFla'nFlaB'PQC'UI'UIB	epsilon-Caprolactam	0	bp				0.55	0.55	7841963	pos309	0		H	pos	24	4.33723e+06	4.99915e+06	3574582	2.92158e+06	3618934	3.69335e+06	3169234	3.24578e+06	7566346	4.63899e+06	3.41767e+06	7.84196e+06	1975643	4230815	2945279	3.20202e+06	1.94693e+06	2.3929e+06	2.116e+06	4982140	3798043	3.67642e+06	4.07646e+06
771.575	3.88774				0.2			-3.99365			nFla'nFlaB'PQC'UI'UIB		0	bp				0.12	0.34	7813224	pos310	0			posneg	24	6.15343e+06	6.69922e+06	5791618	5.26038e+06	7397654	5444989	5.49968e+06	5.78721e+06	4.98518e+06	7191194	7.81322e+06	6316937	7.03135e+06	6055907	5807138	3.94505e+06	5744831	4.03322e+06	2.39536e+06	4893678	6.22611e+06	4901679	5.28042e+06
163.967	2.06838										nFla'nFlaB'PQC'UI'UIB		0	bp				0.68	0.68	7782039	neg69	0			neg	24	5653939	5718573	7328374	5.62991e+06	4265400	4.86612e+06	7675660	3.63929e+06	5673687	3618623	105484	4.45477e+06	4.17148e+06	3.62033e+06	7782039	4642643	5.95405e+06	4662445	3.31305e+06	4300311	3.23567e+06	7009421	5649096
116.131	13.4794	C6H16N2	1	1,6-diaminohexane	7	0	Metacyc	-0.0729994	-31.196	-0.0552699	nFla'nFlaB'PQC'UI'UIB	1,6-diaminohexane	0	bp				0.06	0.74	7695392	pos311	0		H	pos	24	1.37971e+06	459618	653304	1.87531e+06	1105199	2.46804e+06	2.2082e+06	7695392	2.41601e+06	1.77237e+06	2.26344e+06	2.26323e+06	2.01521e+06	2.31242e+06	2.10786e+06	1.85607e+06	1398821	188565	1.23089e+06	2.16123e+06	1.19591e+06	810296	2.06874e+06
101.993	7.74655										nFla'nFlaB'PQC'UI'UIB		0	bp				0.58	0.58	7683589	neg71	0			neg	24	5920050	5.70914e+06	7.33772e+06	6286120	5.13996e+06	5826166	7359637	5.17486e+06	6299732	4.94562e+06	145175	5.61657e+06	5401629	5.30437e+06	7.68359e+06	5.69075e+06	6261099	5799770	5.1142e+06	5853552	5025718	6797453	6362339
307.084	17.8505	C10H17N3O6S	3	Glutathione	8	Central	KEGG_Metacyc_HMDB	0.763681	4.02614	-1.353	nFla'nFlaB'PQC'UI'UIB	Glutathione	0	bp				0.31	0.37	7649361	pos313	0		H	pos	24	6345389	4.51533e+06	4236327	4.17337e+06	5790428	2725454	2.26665e+06	2.85076e+06	3.56557e+06	5402240	7649361	5331610	4.26764e+06	4603512	3562006	2820226	4.53576e+06	3.28669e+06	2.73775e+06	2.91873e+06	4.79866e+06	2.12079e+06	2.71632e+06
232.035	13.1445	C5H13O8P	6	D-Ribitol 5-phosphate	8	Central	KEGG_Metacyc	0.226231	-34.2339	0.430813	nFla'nFlaB'UI'UIB	D-Ribitol 5-phosphate	0	bp		2.3	xC13	0.61	0.61	7555296	pos314	0		H	pos	23	2.9808e+06	1690380	601283	3.70098e+06	2.5522e+06	2.02941e+06	5.80669e+06	4774042	3.61276e+06	2.44262e+06	0	2.4034e+06	2.81781e+06	2804341	3.93834e+06	4455737	1.92231e+06	1.11793e+06	3.26743e+06	4330600	1.06361e+06	7555296	2.94617e+06
281.272	5.87703		0		0.2			-0.383315	#N/A	-0.434504	nFla'nFlaB'PQC'UI'UIB	[FA (18:1)] 9Z-octadecenamide	0	bp	x-H2O	2.7	xC13	0.44	0.44	7551877	pos315	0		H	pos	24	4.85121e+06	5064067	3.01531e+06	4372646	6.13706e+06	4.03e+06	3.04703e+06	4.04051e+06	3.31088e+06	2.9788e+06	5.37836e+06	7.55188e+06	2.90915e+06	3.29245e+06	3.2443e+06	4.09437e+06	2.34608e+06	3394555	4327782	4824399	4921756	3.75793e+06	4480543
290.123	16.4957	C10H18N4O6	6	Ala-Asn-Ser	7	0	Peptides	0.603334	-12.3123		nFla'nFlaB'PQC'UI'UIB	Ala-Asn-Ser	0	bp		-0.3	xC13	0.07	0.25	7502359	pos316	0		H	posneg	24	4727552	5205274	7502359	7132680	5530427	3856931	5.04087e+06	4.05397e+06	6.13846e+06	4.51262e+06	4.02546e+06	4.52428e+06	4642141	4031929	4439269	4.05998e+06	3.6599e+06	4.48152e+06	4.4894e+06	3.57474e+06	3009016	3.43263e+06	5106225
217.143	15.6489	C9H19N3O3	3	beta-Alanyl-L-lysine	8	Central	KEGG	0.27805	-5.07074		nFla'nFlaB'PQC'UI'UIB	beta-Alanyl-L-lysine	0	bp		0.2	xK+xC13	0.25	0.37	7433150	pos317	0		H	posneg	24	2158617	3.54951e+06	4121534	3662223	4.05578e+06	2.02995e+06	3118557	2883835	3.24759e+06	2.29173e+06	2.03831e+06	3.94871e+06	4.1372e+06	4173005	3.82039e+06	4.19782e+06	4.44066e+06	4297922	7.43315e+06	2.60578e+06	1.78188e+06	3.33176e+06	4.89007e+06
157.11	9.22962	C8H15NO2	2	Homostachydrine	7	0	KEGG	0.278223	17.4204	0.333456	nFla'nFlaB'PQC'UI'UIB	Homostachydrine	0	bp				0.09	0.16	7403589	pos318	0		H	pos	24	4823788	5757001	6429365	5.62407e+06	6254302	4777725	3.7319e+06	4.50609e+06	5800543	4720109	5.81028e+06	5145265	6.56304e+06	5.88177e+06	5565457	5921322	5941590	6981394	7.40359e+06	5.04848e+06	4.78891e+06	4123273	5278729
174.1	12.7934	C7H14N2O3	5	N-Acetylornithine	8	Central	KEGG_Metacyc_HMDB	0.330709	8.75621	0.385656	nFla'nFlaB'PQC'UI'UIB	N-Acetylornithine	0	bp		1.4	xNa+xC13	0.32	0.32	7396464	pos312	0		H	pos	24	3.31716e+06	3.98642e+06	3.46367e+06	3580495	6468828	4.43836e+06	2.81466e+06	4.05257e+06	4.68172e+06	4259029	7.39646e+06	5281513	5.36488e+06	5127930	2.73834e+06	6.04616e+06	6.07721e+06	7323957	5.79044e+06	3.81028e+06	4.22081e+06	3.53499e+06	3.81161e+06
153.04	9.09828		0		0.1			-0.473778	#N/A		nFla'nFlaB'PQC'UI'UIB	N-Acetyl-beta-alanine	0	bp	xNa+			0.64	0.64	7376772	pos319	0		Na	pos	24	2.15597e+06	2342553	2.54083e+06	2.10005e+06	2.08025e+06	6331925	5143682	4992206	7376772	6340238	113405	3.68705e+06	1.61181e+06	3.68707e+06	3.89121e+06	2256884	905214	1.79996e+06	1374824	5.40715e+06	5.4901e+06	5445650	6194205
810.655	7.2364				0.1						nFla'nFlaB'PQC'UI'UIB		0	bp	xNa+			0.21	0.21	7363754	pos320	0			pos	24	5973755	6546914	7059376	4.41536e+06	7.36375e+06	5545850	5147748	4.72787e+06	5979927	6.32668e+06	3.7346e+06	5950417	5004791	5804116	6723491	3.81151e+06	5.08565e+06	6146678	5.8316e+06	4.4058e+06	5.26755e+06	4.98143e+06	6.50584e+06
810.658	7.19231		0		0.2			-1.20942	#N/A		nFla'nFlaB'PQC'UI'UIB	SM(d18:0/22:0)	0	bp				0.21	0.46	7363754	pos321	0		Na	pos	24	5973755	6546914	7059376	4.41536e+06	7.36375e+06	1836119	5147748	3.22823e+06	3.3349e+06	2696762	3.76662e+06	5950417	5004791	5804116	6723491	2.16151e+06	1.83615e+06	4726490	2556742	4.4058e+06	5.26755e+06	4.98143e+06	6.50584e+06
616.942	15.4295										nFla'nFlaB'PQC'UI'UIB		0	bp				0.21	0.27	7334735	pos322	0			pos	24	4.53004e+06	5690274	6.3916e+06	5.16708e+06	4862150	6.01192e+06	4.17384e+06	4466740	7.33473e+06	4068087	3.49738e+06	4617823	4735064	4.77433e+06	6319474	3.61877e+06	3.39625e+06	3.97185e+06	4517647	5.96784e+06	5246611	4061165	6.19486e+06
311.356	7.18378	C21H42	7	8E-Heneicosene	7	0	Lipidmaps	1.03575	44.319		nFla'nFlaB'PQC'UI'UIB	8E-Heneicosene	0	bp		1	xC13	0.1	0.39	7297853	pos323	0		NH3	pos	24	7297853	3.76933e+06	4.21795e+06	2529340	5.34083e+06	2.49653e+06	4814082	4.64072e+06	6154957	3.04526e+06	3.76472e+06	4.37447e+06	4.6712e+06	4.09901e+06	4910420	4147907	2.32597e+06	3.01252e+06	4.40647e+06	5444659	4.20524e+06	3.29748e+06	3.84245e+06
343.221	4.57183										nFla'nFlaB'PQC'UI'UIB		0	bp				0.04	0.36	7279366	pos325	0			pos	24	3.86111e+06	2678431	2.99894e+06	3605451	4246715	2579913	5349176	5987758	3.89816e+06	7.27937e+06	3.55059e+06	3.29846e+06	3.36478e+06	3.46003e+06	3.21964e+06	1.93783e+06	2255716	2041770	2.6256e+06	4913477	2.57554e+06	3.24395e+06	2.89492e+06
90.0317	9.70246	C3H6O3	6	(S)-Lactate	10	Central	KEGG_Metacyc_HMDB	-0.125385	-0.029591		nFla'nFlaB'PQC'UI'UIB	(S)-Lactate	0	bp		1	xC13	0.08	0.27	7262092	neg73	0		H	neg	24	5026220	5624362	6.62559e+06	5.11919e+06	5878608	4.42126e+06	3.91566e+06	4485048	7.26209e+06	4545749	5180104	4207537	4799300	4.53564e+06	4448363	4.16565e+06	4.69076e+06	5.27112e+06	5017619	3877795	3.54079e+06	2.87951e+06	4.57453e+06
117.967	15.2448										nFla'nFlaB'PQC'UI'UIB		0	bp			xC13	0.57	0.57	7251056	neg74	0			neg	24	7137457	6685564	5.11854e+06	5.0998e+06	6.78007e+06	6.47276e+06	5714468	6770895	4.99974e+06	6.57463e+06	48919.6	5.13965e+06	6.51316e+06	6.34478e+06	5.09992e+06	6.07936e+06	6.34693e+06	5.91927e+06	4389109	5.16674e+06	6.06632e+06	7251056	3.85979e+06
145.074	12.5691	C6H11NO3	9	Allysine	8	Central	KEGG_HMDB	0.427758	19.9173	0.42997	nFla'nFlaB'PQC'UI'UIB	Allysine	0	bp			x-CO2	0.21	0.21	7246001	pos326	0		H	pos	24	3.87337e+06	3.8788e+06	4.11333e+06	4300540	4.78226e+06	5.2861e+06	3.88136e+06	4852803	6.12048e+06	4.87629e+06	6.55944e+06	6541219	5664950	5.54695e+06	3726816	5582867	5.69436e+06	6.83766e+06	7246001	5530102	5.71247e+06	4.94773e+06	5586146
132.062	13.9116										nFla'nFlaB'PQC'UI'UIB		0	bp				0.24	0.26	7059983	pos327	0			pos	24	5775842	5.75889e+06	3.9217e+06	4941315	6958390	5175947	4.02746e+06	4892645	5142652	4.75542e+06	7059983	5816045	5138847	5297841	3.46191e+06	6137318	5173049	6771735	4.22391e+06	4.77349e+06	4.85625e+06	3.90576e+06	2.55885e+06
266.155	3.52117	C12H26O4S	1	sodium dodecyl sulfate	7	0	Metacyc	-0.338498	-8.68483		nFla'nFlaB'PQC'UI'UIB	sodium dodecyl sulfate	0	bp		0	xC13	0.07	0.46	7048939	neg76	0		H	neg	24	3375610	3.51612e+06	2.80054e+06	2.78269e+06	7048939	2.34424e+06	4193331	3509073	4595644	2.68224e+06	4.98336e+06	4387956	4.28351e+06	4.30991e+06	4.14085e+06	2.56426e+06	2.82314e+06	2802612	3253589	3.8318e+06	4.31772e+06	2615646	3.15349e+06
838.683	7.4884				0.2						nFla'nFlaB'PQC'UI'UIB		0	bp				0.55	0.55	7045787	pos328	0			pos	24	3.75735e+06	4.79315e+06	3.76247e+06	2.60154e+06	5.46097e+06	3.39566e+06	2.51468e+06	1.55619e+06	2888363	1.93266e+06	670286	7045787	3.8699e+06	5956114	4.6384e+06	3.18234e+06	3.67893e+06	5.28273e+06	5.03277e+06	3.70168e+06	3.63913e+06	2.76356e+06	4.58103e+06
485.861	4.85747										nFla'nFlaB'UI'UIB		0	bp				0.76	0.76	7010333	pos329	0			pos	23	5.89321e+06	5384509	6.80317e+06	5.06404e+06	3809890	3.09268e+06	4493234	2.60427e+06	3.54192e+06	2.87127e+06	0	3691417	3.21201e+06	2.55875e+06	7010333	4496491	5.30122e+06	3.96845e+06	2880587	2.55826e+06	2.8326e+06	3977510	3732636
204.061	13.4726	C6H14O6	5	Mannitol	10	Central	KEGG_Metacyc_HMDB	-0.454754	-0.91847		nFla'nFlaB'PQC'UI'UIB	Mannitol	0	bp				0.3	0.3	7008464	pos330	0		Na	posposnegneg	24	6324295	5.82818e+06	3.37938e+06	4032332	6267387	4.6296e+06	2220862	4695930	5427562	4.53006e+06	3.54885e+06	6.18101e+06	4.82431e+06	5084103	2.80274e+06	6.55172e+06	6020147	7.00846e+06	6850710	5872187	5593451	3.73832e+06	3.59073e+06
723.067	15.9848										nFla'nFlaB'PQC'UI'UIB		0	bp				0.45	0.77	6930725	pos331	0			pos	24	3.50205e+06	4977458	6.46643e+06	4.41524e+06	2853331	3.52979e+06	1.12542e+06	2.90244e+06	6930725	3.22744e+06	1.06397e+06	4.16213e+06	4677781	4.67613e+06	6041533	695894	1.81516e+06	2.8143e+06	5601786	5.72111e+06	3958716	1.77765e+06	6065784
143.92	12.7452				0.4						UI'UIB		0	bp				1.59	1.59	6927910	pos332	0			pos	23	1.28042e+06	1.01315e+06	4.7792e+06	1.29008e+06	734272	884138	4519900	711547	781498	607329	0	624643	848176	653984	6.92791e+06	860410	898987	638394	600513	770101	573395	1.6789e+06	1.09061e+06
646.452	3.44382										nFla'nFlaB'PQC'UI'UIB		0	bp				0.05	0.42	6916634	pos333	0			pos	24	3.35158e+06	4.6891e+06	4.06593e+06	6004131	4.01895e+06	3.50164e+06	3.55071e+06	3867045	5.28217e+06	1.85096e+06	3310649	3.13036e+06	3.29128e+06	2980012	3.41201e+06	5204379	1.96315e+06	3.01621e+06	5223252	4244660	3.64719e+06	3408477	6.91663e+06
156.076	4.25158				0.1						nFla'nFlaB'UIB		0	bp	xNa+			0.82	0.85	6882311	pos334	0			pos	23	5435884	1.93344e+06	3.34732e+06	6780062	2002063	472791	2.18506e+06	496774	2.18929e+06	2.01022e+06	0	3.20315e+06	2.67697e+06	2305825	6.88231e+06	3.75174e+06	5772346	1.14419e+06	635399	4356425	3200952	4.69813e+06	977843
146.114	12.5006				0.1						nFla'nFlaB'PQC'UI'UIB		0	bp	xC13			0.04	0.14	6845273	pos336	0			pos	24	3.88033e+06	4.25449e+06	5.11079e+06	4.58482e+06	4.56328e+06	5093173	4.62107e+06	4251613	5908879	4.58708e+06	5.36948e+06	5.23328e+06	5.67858e+06	5266538	5098245	4.99432e+06	5449032	6.84527e+06	5.70926e+06	5.28477e+06	5194889	4.97932e+06	5366979
278.086	4.29503		0		0.2			1.954	#N/A		nFla'nFlaB'PQC'UI'UIB	Aminoparathion	0	bp				0.11	0.41	6830811	pos337	0		NH3	posneg	24	3.41699e+06	3.33599e+06	3391638	5.68277e+06	2.2414e+06	5508227	5.61224e+06	4578314	4582111	4.27103e+06	5627468	5.6538e+06	5084006	5625419	4.34367e+06	6.83081e+06	3.4756e+06	2.86133e+06	3.87949e+06	4930275	3462355	5642376	3.11311e+06
119.911	5.43661				0.2						nFla'nFlaB'PQC'UI'UIB		0	bp				0.09	0.28	6756982	neg80	0			negnegneg	24	2130824	4384876	4672768	4894439	4871341	5043867	4.64154e+06	4.80078e+06	5.63376e+06	5.78524e+06	3.70009e+06	4289769	3.85369e+06	4560259	3.92809e+06	5.67333e+06	4.99531e+06	5.3131e+06	6756982	4964003	5302577	5.07507e+06	5.2531e+06
577.973	10.3193				0.2						nFla'nFlaB'UI'UIB		0	bp				0.58	0.58	6734121	neg82	0			negneg	23	6.18902e+06	5730009	6.46498e+06	5851970	4230876	5697928	6.73412e+06	5.03211e+06	5.55345e+06	3853804	0	5039659	4.93898e+06	5.0071e+06	6.53248e+06	4543063	5.24679e+06	4576187	4356892	5.76155e+06	4699927	5.77309e+06	5.65515e+06
233.07	12.9926							3.58988			nFla'nFlaB'PQC'UI'UIB		0	bp				0.31	0.41	6730781	pos338	0			pos	24	5.84185e+06	5109457	5005256	5.16742e+06	4.00577e+06	5106378	6249639	5564161	4804842	4.1255e+06	3.27507e+06	4351333	3.80428e+06	3801436	6.73078e+06	5.958e+06	1.7887e+06	4.5899e+06	4.65361e+06	6238694	5069137	6.32765e+06	4.4238e+06
175.03	7.1844	C6H6O3S	1	benzenesulfonate	7	0	KEGG_Metacyc	0.0530375	13.9675		nFla'nFlaB'PQC'UI'UIB	benzenesulfonate	0	bp				0.19	0.31	6656700	pos339	0		NH3	pos	24	3.93687e+06	6656700	5750363	3.92756e+06	4188811	3.18596e+06	2.16206e+06	4.08673e+06	3171092	2611788	4461700	3.16625e+06	3614748	3239495	2.67618e+06	2.27022e+06	1.59972e+06	2.97023e+06	2141183	2816732	2377495	1.33398e+06	3.36984e+06
117.914	5.51923		0		#N/A			0.0834053	#N/A		nFla'nFlaB'PQC'UI'UIB	Chloroform	0	bp				0.03	0.15	6635359	neg84	0		H	neg	24	4902564	5590246	4842067	4743873	4933411	4993333	4857748	5.0603e+06	5.64262e+06	5976579	3.71197e+06	4.03023e+06	3.86819e+06	3975625	3852579	5645657	4.94175e+06	4905021	6.63536e+06	5.27853e+06	5.43108e+06	4.8736e+06	5.13845e+06
213.052	15.3868		0		0.1			1.25373	#N/A		nFla'nFlaB'UI	Carbendazim	0	bp	xK+			0.58	1.1	6634984	pos341	0		Na	pos	23	1.12487e+06	1.32671e+06	1524667	1.2476e+06	1.68703e+06	1191840	1.36769e+06	1.23596e+06	1.47619e+06	1.29317e+06	0	1.70397e+06	1292888	1.21063e+06	1502022	1.43661e+06	1.40241e+06	1.55025e+06	1.52275e+06	1.1554e+06	6.63498e+06	1.05359e+06	1.45556e+06
371.304	4.31361	C21H41NO4	2	Tetradecanoylcarnitine	7	0	HMDB	0.243869	14.5999	0.264057	nFla'nFlaB'PQC'UI'UIB	Tetradecanoylcarnitine	0	bp		6	xC13	0.07	0.13	6575788	pos342	0		H	pos	24	4406757	4.00472e+06	4533509	5.4387e+06	4.01887e+06	6.48773e+06	5735058	5.00018e+06	5772121	6.26005e+06	5542622	5085627	5351086	4.68886e+06	4.95623e+06	6097783	4.76415e+06	5063138	5.21771e+06	5.04742e+06	6.57579e+06	6296423	5.28683e+06
701.065	13.5402				0.1						nFla'nFlaB'UI'UIB		0	bp	xK+			0.79	0.79	6512769	pos343	0			pos	23	2.17067e+06	2.24412e+06	4591510	2.7467e+06	2252477	2.43907e+06	4579626	1.87471e+06	2835446	2262615	0	2321790	3.17412e+06	2.76257e+06	6.51277e+06	2.38973e+06	3.63796e+06	2.77248e+06	2.28831e+06	2013195	1.55448e+06	3.41245e+06	3.83624e+06
123.975	2.12113										nFla'nFlaB'PQC'UI'UIB		0	bp				0.65	0.65	6488161	neg85	0			neg	24	5162851	4.77363e+06	6.07785e+06	5.01075e+06	3939242	4.21277e+06	6.48816e+06	3.42393e+06	4.43946e+06	3.13928e+06	56489.1	3.72175e+06	3.51306e+06	3.2117e+06	6.13624e+06	3.98564e+06	4734199	4.05645e+06	3.14433e+06	3.98757e+06	2.87084e+06	5.42234e+06	4847837
388.173	13.7615	C18H28O9	1	Tuberonic acid glucoside	7	0	KEGG_Metacyc_Lipidmaps	-2.0282	49.6807	0.793866	nFla'nFlaB'PQC'UI'UIB	Tuberonic acid glucoside	0	bp				0.16	0.19	6441053	pos344	0		H	pos	24	3.9872e+06	4.03839e+06	4899083	4536014	3.6835e+06	5.08257e+06	3.73387e+06	4880095	6441053	5334073	5494186	4221891	4.91849e+06	4834435	3.603e+06	4.0575e+06	4.20701e+06	5.22265e+06	3.66525e+06	3697800	3.74158e+06	4756546	3.54186e+06
307.084	17.0623		0		#N/A			-0.00256153	#N/A	2.11412	nFla'nFlaB'PQC'UI'UIB	Stealthin C	0	bp				0.25	0.25	6407966	pos324	0		H	posneg	24	4.73381e+06	4801390	4.61249e+06	4.9692e+06	5834729	2.90266e+06	2.52735e+06	2759166	4.25078e+06	3.39182e+06	6.40797e+06	4.78403e+06	3.97073e+06	4535070	3.31133e+06	2.98649e+06	3.67603e+06	3226454	3.90846e+06	3.41101e+06	3.12909e+06	2.45145e+06	3845161
163.967	27.2785										nFla'nFlaB'PQC'UI		0	bp				0.2	0.86	6364752	neg87	0			neg	24	952747	1.65708e+06	2.23212e+06	4056175	1.6297e+06	1.07225e+06	1676063	1.86145e+06	3.53234e+06	1.1795e+06	3.74398e+06	2.92684e+06	2.96112e+06	2.52804e+06	2.24184e+06	2.52844e+06	1.49937e+06	1.34592e+06	5661301	2746733	1034496	1.02464e+06	6364752
824.206	10.5238				0.1						nFla'nFlaB'UI'UIB		0	bp	xNa+			0.58	0.58	6325111	pos345	0			pos	23	4.92062e+06	6.32511e+06	5.67421e+06	5.73304e+06	5309470	5127019	5367065	4606706	6098761	5.65336e+06	0	5868672	6245840	4492239	5450464	5695235	5705455	6.02424e+06	5.24423e+06	5023612	4.99201e+06	5435695	4.68286e+06
158.131	3.99344	C9H18O2	26	FA methyl(8:0)	8	Central	Lipidmaps	-0.128337	-26.6236	-0.154239	nFla'nFlaB'PQC'UI'UIB	FA methyl(8:0)	0	bp		0	xC13	0.06	0.23	6262120	neg88	0		H	neg	24	5801254	5.76189e+06	4999254	4760905	5115998	5.78333e+06	4044999	6262120	5605328	3552859	3.46926e+06	3.56866e+06	3706369	3.99922e+06	3.84699e+06	4.38037e+06	6.17129e+06	4.54161e+06	4307166	5554066	4410484	4.6045e+06	4.50879e+06
126.043	11.4042	C5H6N2O2	2	Imidazole-4-acetate	10	Central	KEGG_Metacyc_HMDB	0.155361	-0.262511		nFla'nFlaB'PQC'UI'UIB	Imidazole-4-acetate	0	bp				0.13	0.23	6144143	pos347	0		H	pos	24	2.99244e+06	2.75845e+06	2.71384e+06	2.82141e+06	3.39166e+06	6144143	3.86051e+06	5.12061e+06	5.84276e+06	5.33415e+06	3757228	3.76441e+06	3.78695e+06	3946820	2.75706e+06	3.21995e+06	3.45226e+06	4543041	3.02664e+06	3.69287e+06	5512123	3673170	3.4722e+06
97.977	14.6327		0		0.2			1.06537	#N/A	-1.18738	nFla'nFlaB'PQC'UI'UIB	Orthophosphate	0	bp				0.17	0.61	6071919	neg91	0		H	negneg	24	3.4976e+06	4486939	4.11463e+06	4.43094e+06	4.42255e+06	1.43125e+06	1376205	4.01075e+06	4.34898e+06	1343971	6.07192e+06	4630542	4.87319e+06	4.62332e+06	3.81025e+06	4.68685e+06	3.9237e+06	4.72124e+06	5011951	4.49098e+06	4.02164e+06	1.42987e+06	5.23173e+06
123.975	1.69237				0.2						nFla'nFlaB'PQC'UI'UIB		0	bp				0.66	0.66	6022924	neg92	0			neg	24	4.87652e+06	4.42937e+06	5.88069e+06	4722219	3.65355e+06	4.18295e+06	6.01735e+06	3.19286e+06	4.39072e+06	2.82634e+06	56489.1	3712447	3.38802e+06	3.02713e+06	6.02292e+06	3.75163e+06	4.49163e+06	3963317	2948491	3.95558e+06	2.81431e+06	5385718	4.80432e+06
653.325	3.4796							5.25317			nFla'nFlaB'PQC'UI'UIB		0	bp				0.08	0.42	6015956	pos348	0			pos	24	4.50812e+06	2.33583e+06	5422685	3.59716e+06	4.09308e+06	4.43122e+06	1.54713e+06	2126898	2.85325e+06	4.13631e+06	4.71936e+06	5.33926e+06	5263810	4828648	4331791	6.01596e+06	4.06427e+06	3.02901e+06	3.25545e+06	4.78016e+06	1972853	3705381	5924663
144.04	11.4179	C4H10O4	2	Erythritol	9	0	KEGG_Metacyc_HMDB	-0.144092	-0.280801		nFla'nFlaB'PQC'UI'UIB	Erythritol	0	bp				0.51	0.51	6002316	pos349	0		Na	posneg	24	3.12429e+06	4267627	2.6769e+06	3848596	4.09569e+06	4.75457e+06	3350658	4199913	5.46539e+06	4.68932e+06	946078	5.80471e+06	5.28812e+06	5376093	2877443	5962867	5.68139e+06	6002316	5326927	4263605	4.56422e+06	4.10728e+06	4.6497e+06
299.195	4.69694										nFla'nFlaB'PQC'UI'UIB		0	bp				0.1	0.39	5990605	pos350	0			pos	24	3.02308e+06	2.22869e+06	3.07999e+06	2.86653e+06	3.56858e+06	2.78393e+06	5154824	5990605	3.42092e+06	4.34211e+06	2.71611e+06	2.8377e+06	2.82388e+06	3.35406e+06	2646694	2053298	2558071	2505283	2.71288e+06	5.54182e+06	2983501	2722650	2888110
529.281	3.91147	C25H40N2O7S	1	Lipoxin D4	7	0	Lipidmaps	-2.47264	-2.26347		nFla'nFlaB'PQC'UI'UIB	Lipoxin D4	0	bp				0.59	0.59	5983050	pos351	0		NH3	posnegneg	24	1702726	1.74106e+06	1.54852e+06	2.5781e+06	2.91048e+06	2.97771e+06	3.53542e+06	2.1254e+06	1.45816e+06	2.67095e+06	5.98305e+06	1.81545e+06	2.68673e+06	2.68012e+06	1.64427e+06	2.65587e+06	2440383	2.23534e+06	2.26313e+06	2.04021e+06	1.22129e+06	2.03516e+06	2.60276e+06
519.327	4.28551										nFla'nFlaB'PQC'UI'UIB		0	bp				0.05	0.4	5841706	pos353	0			pos	24	2.36911e+06	1.54931e+06	1.33146e+06	2.78381e+06	2.52114e+06	1.657e+06	3.43902e+06	5841706	3.94239e+06	5.02058e+06	2.58795e+06	2.37056e+06	2.51678e+06	2370017	2.29905e+06	3.05518e+06	1.32001e+06	1.52109e+06	2.6413e+06	4368364	1.65694e+06	4.15064e+06	2.41859e+06
621.938	10.533										nFla'nFlaB'UI'UIB		0	bp				0.66	0.66	5840784	pos354	0			pos	23	4.32467e+06	4.15355e+06	5.46859e+06	5.15367e+06	2.89627e+06	4.61344e+06	5.84078e+06	3731781	3.76052e+06	3.05573e+06	0	4.06229e+06	2.83554e+06	3.11072e+06	5599296	3.79941e+06	3.95961e+06	3.13018e+06	3046637	3.50313e+06	3.4681e+06	4.00121e+06	4049940
113.048	8.81001		0		0.2			0.519477	#N/A	0.642834	nFla'nFlaB'PQC'UI'UIB	(S)-1-Pyrroline-5-carboxylate	0	bp				0.41	0.41	5829956	pos355	0		H	pos	24	1539837	1.48801e+06	1.43426e+06	1.10828e+06	1.71965e+06	4.72782e+06	2.70591e+06	3.57867e+06	4105043	5.82996e+06	1.95777e+06	3.16912e+06	1.41746e+06	1.11104e+06	1.9828e+06	1.7223e+06	897228	1.87517e+06	1.30266e+06	4854748	4948583	3250342	4.15174e+06
420.951	14.2052				0.1						nFla'nFlaB'UI'UIB		0	bp	xK+			1.14	1.14	5812761	pos356	0			pos	23	1.75978e+06	1.78765e+06	5.81276e+06	2.20365e+06	1.42623e+06	1.09656e+06	2.81028e+06	529776	1.00115e+06	1.16894e+06	0	656824	926190	937089	3683009	498945	1.33734e+06	503478	340581	311352	418838	1.13641e+06	1.14889e+06
210.077	14.9989		0		0.1			0.77807	#N/A		nFla'nFlaB'PQC'UI'UIB	Peganine	0	bp	xMSnoise			0.18	0.34	5769843	pos357	0		Na	pos	24	2.13664e+06	1.96751e+06	2433511	3.35179e+06	2103775	3.5135e+06	3.4284e+06	2600679	5769843	2.92133e+06	3.87885e+06	3.32664e+06	2489914	2.78392e+06	2749223	2653027	2.93131e+06	2848680	2.39394e+06	4.09432e+06	2863411	3.16202e+06	3.62355e+06
274.859	14.9526		0		#N/A			2.62665	#N/A		nFla'UI'UIB	3,5-dibromo-4-hydroxybenzonitrile	0	bp			xCl37	0.59	0.96	5764228	pos358	0		H	pos	23	588488	2.11855e+06	2.95423e+06	5052243	1.00347e+06	808863	1.05448e+06	1.61674e+06	4.83514e+06	723673	0	3655360	5246139	4683943	3.7592e+06	3.3708e+06	1.0119e+06	1.3914e+06	5764228	4.16735e+06	795267	595783	4435860
256.24	27.7817		0		#N/A			-0.196259	#N/A	-0.224936	nFla'nFlaB'PQC'UI'UIB	Hexadecanoic acid	0	bp		0.1	xC13	0.04	0.04	5757045	neg93	0		H	neg	24	5019158	5.10784e+06	5.21402e+06	5531971	5419785	5277797	5.45911e+06	5.27662e+06	5405285	5757045	5.57804e+06	5.28924e+06	5.18947e+06	5.14627e+06	4.96367e+06	5484102	5.36757e+06	5.35049e+06	5.31611e+06	5417742	5286922	5.28838e+06	5719442
401.137	12.1002	C15H23N5O6S	1	Met-Asp-His	7	0	Peptides	0.282566	-32.2298		nFla'nFlaB'PQC'UI'UIB	Met-Asp-His	0	bp		3.4	x2+xC13	0.02	0.66	5743661	pos359	0		H	pos	24	2.23123e+06	3.17329e+06	3.70046e+06	5.74366e+06	2.47143e+06	1.80525e+06	2.22523e+06	2.08956e+06	4.10193e+06	1.66626e+06	3.22189e+06	3.24724e+06	3088788	3.1644e+06	3212428	3.60621e+06	1.87497e+06	2.20963e+06	3.87796e+06	3.664e+06	372340	1.48496e+06	4766017
517.315	7.12317		0		0.1			1.05163	#N/A		nFla'nFlaB'PQC'UIB	LysoPC(16:0)	0	bp	xNa+		xNa+	0.5	0.85	5702868	pos361	0		Na	pos	24	3.45538e+06	1.70649e+06	1.61e+06	3693154	2.34067e+06	4.36597e+06	2.90479e+06	2.68741e+06	913879	1.73141e+06	911348	5285097	3.62368e+06	3731101	2.66218e+06	1.0948e+06	1.12533e+06	1.01732e+06	4.2892e+06	2.60637e+06	5502790	2.31495e+06	5.70287e+06
245.163	7.24224	C12H23NO4	4	2-Methylbutyroylcarnitine	7	0	HMDB	-0.463853	24.2678	-0.485321	nFla'nFlaB'PQC'UI'UIB	2-Methylbutyroylcarnitine	0	bp				0.11	0.15	5699867	pos362	0		H	pos	24	2.70709e+06	2.91156e+06	3151411	2.57908e+06	3120000	4.52159e+06	4.18246e+06	4829582	5.69987e+06	4.16776e+06	3.82251e+06	3.75485e+06	3.48286e+06	4.47173e+06	3.35346e+06	4.14396e+06	3.30425e+06	4.04693e+06	4805637	5.53482e+06	4353794	5.03464e+06	5.17755e+06
159.145	9.21641										nFla'nFlaB'PQC'UI'UIB		0	bp				0.07	0.17	5689184	pos363	0			pos	24	2645005	2802406	3.01356e+06	3301819	3299922	2.72124e+06	2.52664e+06	3.0054e+06	2.96767e+06	3447880	3.91145e+06	3.88969e+06	3818080	3.71697e+06	3310944	3.801e+06	5689184	4.45588e+06	4.53143e+06	3.19971e+06	3712495	2.6815e+06	3.64442e+06
97.9769	15.8021	H3O4P	1	Orthophosphate	8	Central	KEGG_Metacyc_HMDB	0.278022	-25.586		nFla'nFlaB'PQC'UI'UIB	Orthophosphate	0	bp			xK+x2-merxNH3x3-mer	0.37	0.4	5672507	pos364	0		H	pos	24	3.11596e+06	2.02646e+06	2.3074e+06	1.49889e+06	2.3099e+06	1.88867e+06	2.43341e+06	1.8711e+06	1.48188e+06	2.89319e+06	5.67251e+06	3.14962e+06	2.63905e+06	2.85339e+06	2.74514e+06	1.37467e+06	3.74029e+06	2400631	2.21327e+06	1.64533e+06	3.36833e+06	2.27111e+06	2075694
700.555	4.17328				0.2			4.74456			nFla'nFlaB'PQC'UI'UIB		0	bp				0.09	0.23	5665279	pos366	0			pospos	24	2879667	2.86999e+06	3.58122e+06	2.36492e+06	2.97872e+06	3.00251e+06	2.39124e+06	2.67398e+06	3.28337e+06	2830849	5665279	4.92834e+06	4.71202e+06	4686652	4525376	2951213	4.86381e+06	3.22922e+06	3.5718e+06	3.52241e+06	3.95062e+06	3503680	3.7844e+06
172.071	6.3344										nFla'nFlaB'UI'UIB		-1.32e-05	bp				0.71	0.71	5660682	pos367	0			pospos	23	4244798	3788313	3179109	4.88168e+06	3.73463e+06	3.07255e+06	5.66068e+06	2.30486e+06	2.16689e+06	1.40855e+06	0	2.1271e+06	1.74379e+06	1.63835e+06	3.61878e+06	2.99097e+06	4.33008e+06	3.12337e+06	2.63822e+06	3.57078e+06	2.03787e+06	3.42638e+06	3.78863e+06
228.147	12.2047	C11H20N2O3	3	L-isoleucyl-L-proline	7	0	HMDB	0.0523616	28.382	0.0707944	nFla'nFlaB'PQC'UI'UIB	L-isoleucyl-L-proline	0	bp		0.2	xC13	0.08	0.19	5659903	pos368	0		H	pos	24	3.37746e+06	3461978	4.21626e+06	4.22799e+06	3.81628e+06	3.77309e+06	3.62264e+06	3775597	5.47294e+06	3665910	4.23297e+06	4876955	4.79127e+06	5174077	4379806	4.0147e+06	4.55046e+06	4450523	5.6599e+06	5235795	3.81084e+06	4222083	5110420
129.043	10.1824	C5H7NO3	6	4-Oxoproline	8	Central	KEGG_Metacyc	0.0234019	-48.2274		nFla'nFlaB'PQC'UI'UIB	4-Oxoproline	0	bp				0.33	0.36	5633257	neg75	0		H	neg	24	2.23749e+06	2.02261e+06	2386598	2.65209e+06	2.53392e+06	2.0726e+06	1.90998e+06	2.31175e+06	3.24831e+06	2698165	5.63326e+06	3.10795e+06	3.20225e+06	3232290	2.60669e+06	3.57905e+06	3.54297e+06	4.59806e+06	4537476	2.65932e+06	4037736	1.74848e+06	2.78615e+06
886.557	4.04037	C47H83O13P	26	PI(38:4)	8	Central	0	0.253579	0.999084		nFla'nFlaB'PQC'UI'UIB	PS(36:1)	97.0051	bp		2.3	xC13xC13	0.29	0.29	5585290	neg86	0		H	neg	24	3801792	4.83219e+06	4870201	2.77112e+06	5.52926e+06	3.19922e+06	2448698	3555642	3.90558e+06	4.66277e+06	5585290	4445992	3.23944e+06	3.48383e+06	2693232	4.5237e+06	5.2305e+06	5.23431e+06	4.76342e+06	3895645	4.4365e+06	2.93178e+06	3.87354e+06
170.993	14.9147	C2H6NO6P	1	phosphoglycolohydroxamate	7	0	KEGG_Metacyc	0.521281	-17.888		nFla'nFlaB'UI	phosphoglycolohydroxamate	0	bp		2.9	xClx2-merxC13	0.56	0.8	5577666	neg95	0		H	negpos	23	5.57767e+06	3.35447e+06	2677744	834382	5018092	5.55509e+06	4296511	3.75175e+06	890868	5.52516e+06	0	1.61162e+06	1.89772e+06	1.80704e+06	1.81432e+06	1.67342e+06	4037047	3.74065e+06	192356	729411	4.02815e+06	4766767	193778
523.533	3.47535	C34H66O2	14	[FA (34:2)] 1-octadecyl-11E-hexadecenoate	7	0	Lipidmaps	0.873811	-15.0962		nFla'nFlaB'PQC'UI'UIB	[FA (34:2)] 1-octadecyl-11E-hexadecenoate	0	bp				0.12	0.23	5520591	pos369	0		NH3	posneg	24	3.9432e+06	5520591	4.74307e+06	5.01313e+06	4632447	3.96466e+06	4.35879e+06	3705646	5166980	4.10981e+06	3171052	2.43703e+06	2403111	2.84144e+06	2.61745e+06	4926942	3.03965e+06	4069609	5187967	3.90197e+06	3.54246e+06	3.151e+06	4036715
330.198	3.96748										nFla'nFlaB'PQC'UI'UIB		0	bp				0.3	0.34	5516642	pos370	0			posneg	24	3.21721e+06	2.0976e+06	2.6872e+06	2512823	3.31373e+06	2518374	1.21985e+06	2.49312e+06	2.42583e+06	2.49002e+06	5.51664e+06	3406022	2.98626e+06	4.00627e+06	2.65226e+06	2.55848e+06	2.05749e+06	2.46335e+06	4.0099e+06	2.59804e+06	2.04746e+06	1.55124e+06	3896329
151.121	4.52503				0.2						nFla'nFlaB'PQC'UIB		0	bp				0.06	0.81	5495527	pos371	0			pos	24	2.85973e+06	1.35018e+06	1.30395e+06	3617776	1751687	432273	1.17207e+06	409997	1.47032e+06	2.39078e+06	3.12578e+06	3105945	3026542	2.88403e+06	3.38793e+06	5495527	4.72357e+06	827324	1.041e+06	4506416	4.38398e+06	2.32633e+06	1.10725e+06
280.088	4.92446				0.2						nFla'nFlaB'PQC'UI'UIB		0	bp				0.46	0.46	5492344	pos298	0			posneg	24	3.65096e+06	2.82279e+06	1.91264e+06	2052602	2.60945e+06	1.84688e+06	1403116	2.02712e+06	3.09932e+06	3393079	2.9306e+06	2.18727e+06	988834	1.45305e+06	1.2058e+06	5.38596e+06	2.96572e+06	3.57268e+06	5.49234e+06	2.55919e+06	5.06743e+06	1957856	2.05038e+06
774.541	3.72842	C42H79O10P	23	PG(36:2)	8	Central	0	0.0929968	-7.28405	0.102987	nFla'nFlaB'PQC'UI'UIB	PG(36:2)	0	bp				0.16	0.3	5491301	neg97	0		H	neg	24	2.3127e+06	3354877	4.30735e+06	2.12958e+06	3.96118e+06	3.46677e+06	3.46395e+06	3.87588e+06	4951980	3.94697e+06	4251658	3734509	4.18101e+06	4335561	2.80773e+06	5.4913e+06	4.90576e+06	5.30646e+06	4.62441e+06	3.38321e+06	3.89518e+06	3.58823e+06	4.37848e+06
908.539	3.41953		0		0.1			-2.94371	#N/A	-0.300586	nFla'nFlaB'UI'UIB	PI(40:7)	0	bp	xNa+	-3.3	xC13	0.58	0.58	5490504	pos372	0		H	pos	23	4.89949e+06	4170342	4.49151e+06	4520283	3.4195e+06	4.01799e+06	5270044	3.89026e+06	4.12227e+06	3.58476e+06	0	3352852	3.83656e+06	3.38916e+06	4484917	4712453	3.959e+06	3.81635e+06	3.42707e+06	4.5461e+06	3.70778e+06	5.4905e+06	4.19913e+06
265.165	4.3173		0		0.1			-0.534043	#N/A		nFla'nFlaB'UI'UIB	N-Undecanoylglycine	0	bp	xNa+			0.59	0.59	5463021	pos373	0		Na	pos	23	5439989	3.30018e+06	4.60354e+06	4.11028e+06	5.46302e+06	2.82004e+06	4650237	4641052	3454527	2.84868e+06	0	3.65908e+06	2.75975e+06	3.623e+06	4.2774e+06	3.86514e+06	3.05054e+06	3647797	2614458	3.78784e+06	3.47023e+06	2.81e+06	4386997
123.975	3.96199										nFla'nFlaB'UI'UIB		0	bp				0.62	0.62	5441632	neg98	0			neg	23	4499797	3960949	4513306	4.53301e+06	3.33145e+06	3.94173e+06	4846339	3290523	4152098	2.97883e+06	0	3.62519e+06	3523616	3.46977e+06	5441632	3770682	4283952	3.55807e+06	2.9901e+06	3789043	3211794	4.51829e+06	4.2667e+06
806.643	7.34212		0		0.2			0.411077	#N/A		nFla'nFlaB'PQC'UI'UIB	TG(49:7)	0	bp	xNa+			0.56	0.76	5426141	pos374	0		H	pos	24	1.56339e+06	2150900	5094130	1.14785e+06	1.02518e+06	4596627	4.20938e+06	4399808	4.19363e+06	4780808	289125	5426141	3329156	4090925	4.65433e+06	4.1727e+06	3715699	4516878	3.83173e+06	4.06145e+06	4304007	4849843	4465076
424.037	13.779	C12H18N4O7P2S	1	Thiamin diphosphate	10	Central	KEGG_Metacyc_HMDB	-0.623848	-2.94675	-0.788928	nFla'nFlaB'PQC'UI'UIB	Thiamin diphosphate	0	bp				0.06	0.12	5421424	pos360	0		H	posneg	24	3.62581e+06	4.19702e+06	4388146	3753114	4542977	4.22585e+06	3445244	3948193	4842459	4.15214e+06	4.55172e+06	4588779	4486612	4839559	4.04302e+06	4.10388e+06	4.57491e+06	5.42142e+06	4.78697e+06	4744723	4.37819e+06	4265574	4.55919e+06
755.916	14.4688				0.1						nFla'nFlaB'UI'UIB		0	bp	xCl37		xCl37	0.65	0.65	5382865	pos376	0			pos	23	2632336	3.23179e+06	4984452	4836645	2.38438e+06	2237330	3.7425e+06	2.15896e+06	1959622	1.5e+06	0	2.50008e+06	3.35928e+06	2.58838e+06	4.6122e+06	2.9093e+06	2.50142e+06	1.70092e+06	4.10086e+06	2.58866e+06	861112	2271683	5382865
248.064	17.7685		0		#N/A			-0.162784	#N/A		nFla'nFlaB'PQC'UI'UIB	L-beta-aspartyl-L-asparticacid	0	bp		0.7	xC13xK+xNa+	0.25	0.46	5361659	pos377	0		H	posneg	24	2.8682e+06	2519418	2.3879e+06	1.31962e+06	3.27728e+06	2.64274e+06	2.16845e+06	2.60263e+06	1.89027e+06	3525365	5.36166e+06	3.94408e+06	3.20787e+06	3.73635e+06	2.94028e+06	1953570	4.58411e+06	3703636	1703252	1.84848e+06	4056528	2.37159e+06	1.38254e+06
470.211	17.3142	C19H30N6O8	4	Asp-Leu-Ser-His	7	0	Peptides	-2.32649	7.59052	-0.0578828	nFla'nFlaB'PQC'UI'UIB	Asp-Leu-Ser-His	0	bp		4.7	xC13	0.07	0.3	5353084	pos379	0		H	posneg	24	3.6324e+06	3.85231e+06	4.86801e+06	4952338	3.93424e+06	2627807	2.41571e+06	3.37718e+06	4.53673e+06	3250903	4492619	5.0599e+06	5283376	5353084	5104303	3.36206e+06	3.20142e+06	2.72686e+06	5182933	4.61725e+06	3.53542e+06	2.19248e+06	4.33677e+06
187.108	18.0752	C16H30N4O6	9	Ala-Leu-Thr-Ala	7	0	Peptides	0.140054	44.8627		nFla'nFlaB'PQC'UI'UIB	Ala-Leu-Thr-Ala	0	bp			x2-mer	0.05	0.25	5240602	pos380	0		2-charge	pos	24	2543044	2855238	3.60303e+06	2451612	2.73023e+06	2.77216e+06	2257800	2816739	4.05018e+06	2.36504e+06	5240602	4891237	4.65629e+06	4.7998e+06	4.57139e+06	2.91106e+06	2.61981e+06	3.17877e+06	3.53698e+06	4.91572e+06	3.52396e+06	3.23672e+06	3.8033e+06
704.215	19.94										nFla'nFlaB'PQC'UI'UIB		0	bp		C26	xC13	0.04	0.24	5203151	pos382	0			pos	24	4297916	4269015	3738059	3891195	4.09373e+06	3.28345e+06	3.05895e+06	3598373	4929479	3.61161e+06	4012481	3.63321e+06	3.75408e+06	3.76283e+06	3.77275e+06	2.37668e+06	4.13823e+06	3.69044e+06	4.21181e+06	5.20315e+06	4357642	3.82356e+06	3.94666e+06
229.983	18.6714	C9H4O6	1	Stipitatonate	7	0	KEGG_Metacyc	0.434178	12.1313		nFla'nFlaB'PQC'UI'UIB	Stipitatonate	0	bp		-2.6	xC13xNa+	0.48	0.48	5201036	pos383	0		Na	pos	24	3.12182e+06	2.57956e+06	2.51998e+06	1406767	2590365	3848853	3.05911e+06	2910592	2.28741e+06	3.55782e+06	598176	3.08218e+06	4.17284e+06	3.57005e+06	4.18099e+06	2.95332e+06	4.43896e+06	4.31347e+06	3.02418e+06	3.0819e+06	4638011	4.08453e+06	3.12705e+06
636.379	7.869		0		0.1			0.391567	#N/A		nFla'nFlaB'PQC'UI'UIB	CHAPS	0	bp	xNa+	4.8	xC13	0.2	0.38	5170210	pos384	0		Na	pos	24	3348949	3.00381e+06	2.81077e+06	2.93772e+06	3.25013e+06	3.32774e+06	3.31111e+06	3.88368e+06	3.46536e+06	3662900	3145215	4122235	2.36454e+06	3799347	3289376	5.17021e+06	2.08245e+06	3.63244e+06	2.8823e+06	3.4372e+06	3450203	3.33681e+06	3.59572e+06
145.11	4.72832		0		0.2			-0.0996558	#N/A	-0.0894812	nFla'nFlaB'PQC'UI'UIB	Acetylcholine	0	bp				0.31	0.33	5131134	pos385	0		H	pos	24	3.74816e+06	3.56739e+06	2.52665e+06	2.61586e+06	2.86717e+06	2736568	2665658	3047080	3095568	3.46902e+06	5.13113e+06	3.29797e+06	2296960	4.31751e+06	2.96253e+06	4894588	3.53432e+06	3381988	2.93445e+06	2671200	4182861	2.11245e+06	2.60847e+06
749.535	3.79478	C43H76NO7P	16	PE(P-38:5)	8	Central	KEGG_HMDB	-0.991189	-5.40788		nFla'nFlaB'PQC'UI'UIB	PE(P-38:5)	0	bp		-0.6	xC13	0.16	0.16	5127480	neg100	0		H	negnegneg	24	3.06277e+06	4.24624e+06	4.87379e+06	4349646	4.01388e+06	3994995	4311091	3.525e+06	4570989	3.50292e+06	2746379	4.20767e+06	3.09747e+06	3.36395e+06	3313850	5.12748e+06	4506257	4443351	4.11583e+06	4.09396e+06	3.65897e+06	4772004	4.63654e+06
218.019	13.2523	C9H8O5	3	3-(3,4-Dihydroxyphenyl)pyruvate	8	Central	KEGG_Metacyc	1.06513	43.8334		nFla'nFlaB'UI'UIB	3-(3,4-Dihydroxyphenyl)pyruvate	0	bp				0.58	0.58	5110684	pos386	0		Na	pos	23	2.94571e+06	3.15921e+06	5.11068e+06	4.02796e+06	3.26783e+06	2099479	2252385	2.11547e+06	3.77971e+06	2.00868e+06	0	2.48295e+06	3.02465e+06	2.48777e+06	3.40761e+06	2778014	2.95657e+06	3110631	2700735	1.72172e+06	1689156	1.67218e+06	4795680
697.79	9.18596										nFla'nFlaB'UI'UIB		0	bp				0.61	0.61	5061808	pos388	0			pos	23	4.56203e+06	4.07721e+06	4.67123e+06	3.96593e+06	3.52354e+06	3608991	5061808	3.36132e+06	3.72095e+06	3030476	0	3.1812e+06	3.51878e+06	2.80921e+06	4.61471e+06	3579711	3.87987e+06	3.55162e+06	2.97083e+06	3.43169e+06	3.28871e+06	4261300	4.04518e+06
776.552	3.38229							-5.92841			nFla'nFlaB'PQC'UI'UIB		0	bp		C29	xC13	0.1	0.38	5042131	neg101	0			negneg	24	2.88427e+06	3.49297e+06	3761559	3513057	4470914	3.3952e+06	3.35436e+06	4.66765e+06	4.5804e+06	3.95343e+06	4.13584e+06	3.48757e+06	3.68424e+06	3.7057e+06	3157047	4526685	4.35088e+06	4.31904e+06	5.04213e+06	3679873	3.65363e+06	4.08625e+06	1.83158e+06
770.601	3.61888		0		0.1			1.28279	#N/A		nFla'nFlaB'PQC'UI'UIB	demethylmenaquinone-9	0	bp	xC13			0.13	0.23	5021102	pos389	0		H	pos	24	3.31257e+06	3.18498e+06	2709522	3149702	3.12333e+06	3495333	3215444	3.5039e+06	3.78538e+06	3.52521e+06	3.87516e+06	3.77112e+06	3.01676e+06	2948368	3.18581e+06	4.10252e+06	3145572	3197282	3844539	3.52017e+06	3.34048e+06	3.1187e+06	5021102
169.074	7.63922	C8H11NO3	4	Pyridoxine	10	Central	KEGG_Metacyc_HMDB	-0.264085	1.89612	-0.339695	nFla'nFlaB'PQC'UI'UIB	Pyridoxine	0	bp				0.11	0.44	4990719	pos391	0		H	pos	24	1.75417e+06	1726554	3.41976e+06	2.76916e+06	1.97505e+06	2.09673e+06	1.95058e+06	3.06813e+06	4925870	2122966	2.94723e+06	3877085	3810751	3481091	3851487	3491687	4.03694e+06	4990719	4.91798e+06	3.14627e+06	2737775	2287527	4.88737e+06
207.006	13.4716				0.1						nFla'nFlaB'UI'UIB		0	bp	xK+			0.56	0.56	4980805	pos392	0			pos	23	2.46264e+06	2.49462e+06	3.31792e+06	2541389	3.04861e+06	4282553	3713093	3.66981e+06	3.69598e+06	4.14553e+06	0	3.7824e+06	4.06834e+06	4.12864e+06	3.96532e+06	3.74343e+06	4440130	4980805	2.81515e+06	3457288	3346676	4.76967e+06	3.21655e+06
246.122	12.3359	C10H18N2O5	6	L-beta-aspartyl-L-leucine	7	0	HMDB	0.0209863	-10.5697		nFla'nFlaB'PQC'UI'UIB	L-beta-aspartyl-L-leucine	0	bp				0.54	0.54	4958981	pos352	0		H	posneg	24	1.30429e+06	1.35974e+06	1.24037e+06	1.5426e+06	2293089	1.82998e+06	1.06296e+06	1.77414e+06	2.18152e+06	2.03934e+06	4.95898e+06	2.48108e+06	2.33552e+06	2.46473e+06	1.00879e+06	2.27318e+06	1975100	2.58382e+06	3.03061e+06	1689212	1.7003e+06	1.26707e+06	2.20205e+06
723.521	4.09393	C41H74NO7P	17	PE(P-36:4)	8	Central	KEGG_HMDB	0.649759	2.29429		nFla'nFlaB'PQC'UI'UIB	PE(P-36:4)	0	bp		0.5	xC13	0.18	0.2	4906349	neg103	0		H	neg	24	3.13392e+06	3.87104e+06	4.48034e+06	4906349	4332266	2.86369e+06	2379717	2.84221e+06	3.44816e+06	3107327	2375395	4069199	3.4601e+06	3.48467e+06	3.46037e+06	4659981	4414933	4.00942e+06	3.4296e+06	2.83184e+06	2.85423e+06	4.20567e+06	3.24211e+06
170.069	8.90495	C7H7NO3	15	3-Hydroxy-2-methylpyridine-5-carboxylate	7	0	KEGG_Metacyc	-0.0294543	-34.8054		nFla'nFlaB'PQC'UI'UIB	3-Hydroxy-2-methylpyridine-5-carboxylate	0	bp				0.14	0.24	4886152	pos394	0		NH3	pos	24	3.62484e+06	3794231	3760847	3.04482e+06	3773467	4.62541e+06	3.15613e+06	3.44943e+06	4.88615e+06	3.93737e+06	3.90465e+06	3.86145e+06	2.88828e+06	4284500	3.90569e+06	4260100	2450166	4.03237e+06	3235394	3813850	3.86079e+06	3.39416e+06	3.74621e+06
325.371	7.17209	C22H47N	1	di-n-Undecylamine	7	0	0	0.86145	0	0.918748	nFla'nFlaB'PQC'UI'UIB	di-n-Undecylamine	0	bp				0.11	0.25	4865464	pos395	0		H	pos	24	2.75965e+06	2.60737e+06	2968253	4016490	3415672	2.58008e+06	2.59336e+06	2179160	2.53961e+06	2531074	4.00788e+06	4614328	3.62543e+06	3.68279e+06	4.3548e+06	2.36554e+06	2.72409e+06	3.14727e+06	2.65194e+06	2.95197e+06	2807024	4.86546e+06	3625687
319.103	13.6659							4.69338			nFla'nFlaB'PQC'UI'UIB		0	bp		C9	xC13xK+	0.13	0.17	4826542	neg104	0			neg	24	2.96634e+06	3.43573e+06	3.17175e+06	3.12794e+06	3.52517e+06	4.62793e+06	2996076	4.02524e+06	4826542	4196990	3947559	3.705e+06	3.40926e+06	3.44741e+06	2.71479e+06	2.69154e+06	2.67801e+06	3.1468e+06	2.8861e+06	2.90108e+06	2.80844e+06	2.92453e+06	3198925
992.499	16.1615										nFla'nFlaB'PQC'UI'UIB		0	bp				0.44	0.53	4826320	pos396	0			pos	24	2.45762e+06	3.35604e+06	4652225	3.50577e+06	2.67394e+06	2.61389e+06	1.43127e+06	2.50215e+06	4682515	2532537	711032	3952653	3.24989e+06	3.18644e+06	3863019	1.35644e+06	1.68048e+06	2.39401e+06	4.22633e+06	3.49716e+06	2.77648e+06	2263791	4826320
229.24	4.36008	C14H31NO	1	[SP (14:0)] 1-deoxy-tetradecasphinganine	7	0	Lipidmaps	-0.281036	8.25849	-0.33657	nFla'nFlaB'PQC'UIB	[SP (14:0)] 1-deoxy-tetradecasphinganine	0	bp				0.09	1	4819929	pos397	0		H	pos	24	1.75196e+06	1.50786e+06	3.07525e+06	2.40573e+06	1.01203e+06	514315	1.53795e+06	1.21224e+06	1.39092e+06	953801	1.49117e+06	1.57033e+06	1.617e+06	1.81585e+06	1.46018e+06	810801	2.56076e+06	467424	313245	2.43716e+06	1.23181e+06	1.0812e+06	1.37981e+06
868.523	3.32415		0		0.1			-0.0808868	#N/A		nFla'nFlaB'PQC'UI'UIB	PG(42:8)	0	bp	x-NH3	-8	xC13	0.14	0.14	4803983	pos398	0		Na	pos	24	3918671	4.80398e+06	3.91128e+06	3.99378e+06	3.85917e+06	4.01137e+06	3326949	3360290	3862442	4019592	3.05317e+06	4491984	3.87946e+06	4.07131e+06	3.87842e+06	3.59464e+06	3.92197e+06	3.72622e+06	3.04136e+06	3.93571e+06	3985927	3.8905e+06	3.59464e+06
833.576	16.087										nFla'nFlaB'PQC'UI'UIB		0	bp		C47	xC13	0.56	0.56	4779365	pos399	0			pos	24	3870209	4642411	4.46504e+06	3.77534e+06	3870625	4540805	2.2335e+06	3.34486e+06	4779365	3681361	77095.6	3.2048e+06	3.86961e+06	4.20476e+06	3.72315e+06	1.83727e+06	2147260	3.54974e+06	2.92905e+06	4.73664e+06	4133113	2318695	2802607
649.968	19.944										nFla'nFlaB'PQC'UI'UIB		0	bp				0.07	0.24	4769038	pos400	0			pos	24	3.72785e+06	3851665	3672617	4358381	3.50801e+06	3.11632e+06	3258200	3703517	3814100	3.10827e+06	3.84232e+06	4099397	4312112	4371789	3.75975e+06	2.70578e+06	3.55681e+06	3.43792e+06	4769038	4237935	4257590	3.08387e+06	4.59143e+06
549.622	7.29756										nFla'nFlaB'PQC'UI'UIB		0	bp		C36	xC13	0.15	0.33	4752419	pos401	0			pos	24	3.73083e+06	2.65052e+06	2842108	2.59151e+06	2.81489e+06	2254969	2.47295e+06	2481146	4.13129e+06	2.17281e+06	2636558	3.57616e+06	2811247	3077470	3.71509e+06	2.43733e+06	1.9511e+06	2.36522e+06	2902822	4.75242e+06	2703381	2.07818e+06	2.67315e+06
148.037	15.437	C5H8O5	15	(R)-2-Hydroxyglutarate	8	Central	KEGG_Metacyc_HMDB	0.0550302	10.4149	0.109246	nFla'nFlaB'PQC'UI'UIB	(R)-2-Hydroxyglutarate	0	bp		0.3	xC13	0.27	0.27	4683811	neg96	0		H	neg	24	1.69567e+06	1.77802e+06	2254377	2.21931e+06	1.81836e+06	2.2857e+06	2.2554e+06	2062234	2.92028e+06	2.13815e+06	4683811	3.13821e+06	2.66748e+06	2.54597e+06	3069843	3.2428e+06	3560539	4.25919e+06	3.91636e+06	3.57702e+06	3.65893e+06	3.60824e+06	4190487
136.064	22.3642		0		#N/A			0.158544	#N/A		nFla'PQC'UI	1-Methylnicotinamide	0	bp		0.2	xC13	0.06	1.17	4653044	pos402	0		H	pos	24	184425	2.06155e+06	3.07967e+06	3.60164e+06	1.54201e+06	320756	1.38556e+06	2.05142e+06	4.65304e+06	337258	4048523	3.69628e+06	3726128	3539770	4.00778e+06	2.82262e+06	1.16431e+06	1.94538e+06	172183	3895004	436443	126912	206806
456.938	10.7611										nFla'nFlaB'UI'UIB		0	bp				0.64	0.64	4613137	neg105	0			neg	23	3.30855e+06	3.12884e+06	3.71019e+06	3.63018e+06	2.41147e+06	2671445	4.61314e+06	2.35385e+06	2.88666e+06	1.67011e+06	0	2.46957e+06	2.28632e+06	2.12906e+06	3.83764e+06	2246668	3104419	2.85959e+06	2298821	3.059e+06	2.6452e+06	3.51422e+06	3019331
172.071	5.52397										nFla'nFlaB'UI'UIB		0	bp				0.68	0.68	4605385	pos403	0			pos	23	3.80739e+06	2.83568e+06	4605385	2.57776e+06	2199079	2400847	4298701	1.66432e+06	4454984	1.94854e+06	0	1.06051e+06	886771	1.08913e+06	1.86713e+06	2234743	2.44352e+06	3.01935e+06	2.63822e+06	3.57078e+06	1.81149e+06	3.36319e+06	2.29442e+06
798.664	4.65035	C46H91N2O6P	3	SM(d17:1/24:1(15Z))	7	0	HMDB	2.73137	13.9849		nFla'nFlaB'PQC'UI'UIB	SM(d17:1/24:1(15Z))	0	bp				0.17	0.18	4539199	pos378	0		H	pos	24	4.17199e+06	4239238	4052218	4.00461e+06	3.94676e+06	2.86364e+06	3389820	4221927	4.5392e+06	3917322	4.47524e+06	3.57549e+06	3.2041e+06	3.31722e+06	2.92951e+06	3.27372e+06	3.60024e+06	2942711	4425118	3.99641e+06	3.8952e+06	2.90436e+06	4483821
713.719	19.8693										nFla'nFlaB'PQC'UI'UIB		0	bp				0.08	0.25	4524452	pos404	0			pos	24	2652287	3.44878e+06	4.52445e+06	2.64638e+06	3.78526e+06	2.60971e+06	2.26946e+06	2.61731e+06	4.0916e+06	3.47309e+06	2556222	2.91e+06	2.48832e+06	2.34026e+06	2.57054e+06	1.23344e+06	1888335	1.66474e+06	1319573	2.73302e+06	2.66442e+06	1.80672e+06	2.99684e+06
758.923	7.17498										nFla'nFlaB'PQC'UI'UIB		0	bp		C42	xC13	0.11	0.16	4501173	neg107	0			neg	24	3.20656e+06	3.73431e+06	4106068	2733176	3.61243e+06	3.12572e+06	2.29966e+06	2.57757e+06	3.28077e+06	3.30514e+06	4.10972e+06	3.80586e+06	3.21241e+06	3.40892e+06	3.23883e+06	3061805	3.84965e+06	4501173	3.72193e+06	3148588	3.32556e+06	2738484	3237924
501.286	4.10209	C25H44NO7P	5	LysoPE(20:4)	8	Central	HMDB	0.465064	2.48878		nFla'nFlaB'PQC'UI'UIB	LysoPE(20:4)	0	bp				0.24	0.3	4500270	pos405	0		H	posneg	24	3.02869e+06	1.73024e+06	1.57507e+06	1.97809e+06	2.24857e+06	2.92176e+06	2384403	1.93447e+06	1.69104e+06	2.59081e+06	4500270	2.99861e+06	2.81257e+06	3.52162e+06	2.51137e+06	1.28002e+06	2.41066e+06	1.53625e+06	2.37548e+06	2.09076e+06	2.74291e+06	1635029	2400763
134.094	5.12117				0.2						nFla'nFlaB'PQC'UI'UIB		0	bp				0.16	0.65	4477724	pos406	0			pos	24	2.74401e+06	1.36019e+06	945159	3.45961e+06	1.76163e+06	758028	662977	761403	1436995	2034045	1.28177e+06	1.49824e+06	1.73262e+06	1.35935e+06	1.135e+06	3.66828e+06	2374990	765735	1.18683e+06	4.47772e+06	4.27608e+06	2.06935e+06	999558
454.109	15.5193										nFla'nFlaB'PQC'UI'UIB		0	bp		C16	xC13	0.35	0.67	4404143	pos407	0			pos	24	1.10413e+06	666556	373666	2.27754e+06	1.06634e+06	760840	2901846	3.08986e+06	3.13965e+06	1.38326e+06	746871	2.32393e+06	1.8862e+06	1828025	2.18611e+06	2.80739e+06	926927	741569	3.3355e+06	4404143	629204	3.89091e+06	2.3822e+06
489.924	9.93041										nFla'nFlaB'UI'UIB		0	bp		C20	xC13	0.67	0.67	4403328	neg108	0			neg	23	3.40617e+06	3.35703e+06	4.1853e+06	3341359	2.68174e+06	2.92823e+06	4403328	2.51008e+06	3202303	2540710	0	2.80387e+06	1.81735e+06	2393712	4.04712e+06	2920640	2.98116e+06	3.08578e+06	2.70981e+06	3.04666e+06	2.67403e+06	3.70989e+06	3551154
213.004	14.7936		0		0.1			0.679585	#N/A	0.753935	nFla'nFlaB'UI'UIB	4-Phospho-L-aspartate	0	bp	xK+	3	xK+xC13	0.59	0.59	4377182	pos408	0		H	posneg	23	2.48772e+06	1.65862e+06	1.96163e+06	2.41204e+06	2.37188e+06	2863225	2308266	1.97636e+06	3.0903e+06	2936858	0	3.21936e+06	2314908	2.90122e+06	2.17839e+06	2.64846e+06	3.21739e+06	3.34231e+06	3.81702e+06	4377182	3.10112e+06	2.96592e+06	3.45393e+06
233.178	27.599		0		0.2			-1.2635	#N/A	-1.39541	nFla'nFlaB'PQC'UI'UIB	Deoxynupharidine	0	bp			x-NH3	0.02	0.21	4360939	pos409	0		H	pos	24	3.76927e+06	3.43767e+06	3.03946e+06	3.18981e+06	3.54408e+06	2.72934e+06	3.58157e+06	3.65665e+06	2.20342e+06	2.65367e+06	3.40206e+06	3304369	3.34944e+06	3.44681e+06	3.38319e+06	4.36094e+06	3590610	3.78603e+06	2.9693e+06	3.3399e+06	3550958	3.69266e+06	2.91153e+06
833.519	3.38923		0		0.1			-2.24918	#N/A	0.657104	nFla'nFlaB'PQC'UI'UIB	PS(40:7)	0	bp	xNa+		x-NH3	0.18	0.18	4341153	pos410	0		H	pos	24	3.13841e+06	4.07424e+06	4341153	3.63248e+06	3.16381e+06	3.16884e+06	3.88539e+06	2.95575e+06	3.08231e+06	3.26778e+06	2.17561e+06	3000221	3.53298e+06	3123486	3.42751e+06	3.29065e+06	3.17989e+06	2.97833e+06	2.65875e+06	3.04556e+06	2.70234e+06	3.39504e+06	2.87102e+06
185.975	11.0976		0		#N/A			-0.943914	#N/A		nFla'nFlaB'PQC'UI'UIB	Thiodiacetic acid	0	bp			x-CO2	0.57	0.57	4331019	neg109	0		Cl	neg	24	4207690	4.01326e+06	4229286	3.78493e+06	3.74213e+06	3820062	4.30235e+06	3.43571e+06	3.84752e+06	3.3536e+06	34882.4	3597750	3.60102e+06	3.27435e+06	4.33102e+06	3544144	4.11991e+06	3.62697e+06	3.39376e+06	3849567	3.61705e+06	4.18786e+06	3.74949e+06
607.378	4.23079										nFla'nFlaB'PQC'UIB		0	bp				0.13	0.9	4329982	pos412	0			pos	23	1560572	539293	571360	2.14632e+06	1.28659e+06	1.61667e+06	2396322	4.32998e+06	3.66052e+06	2311382	2491214	2.18957e+06	1.87966e+06	1.81093e+06	2044669	2.47494e+06	631149	0	2.05243e+06	3267952	889098	2.8269e+06	1.90274e+06
167.965	9.86402										nFla'nFlaB'UI'UIB		0	bp				0.57	0.57	4295604	neg110	0			neg	23	4.05648e+06	3.36623e+06	3.31534e+06	4.18823e+06	3.64994e+06	4068516	4.28525e+06	3848124	4.16173e+06	3.50819e+06	0	3.50536e+06	3543863	3.4229e+06	4.15401e+06	3935765	3.81927e+06	3.64316e+06	3.77275e+06	3.97326e+06	3.72917e+06	4.2956e+06	4.1431e+06
156.076	5.54675				0.2						nFla'nFlaB'UI'UIB		0	bp				0.63	0.73	4294704	pos414	0			pospos	23	2.25922e+06	2.33414e+06	1.82962e+06	1.26559e+06	1.21267e+06	1.31348e+06	2.00469e+06	887521	4.2947e+06	1.08502e+06	0	1.52394e+06	883886	1090868	1.56312e+06	1.22942e+06	1.25356e+06	1.17424e+06	1684868	779845	770715	1.10246e+06	1.36458e+06
308.159	17.6007	C12H24N2O7	1	psicoselysine	7	0	Metacyc	0.495807	-0.470201	-2.45322	nFla'nFlaB'PQC'UI'UIB	psicoselysine	0	bp		3.3	xC13	0.07	0.24	4293921	pos415	0		H	pos	24	2690431	3121785	3.22344e+06	3.26003e+06	3.4407e+06	2.63266e+06	2.47444e+06	2.85829e+06	4293921	2.98936e+06	3.9348e+06	4.23321e+06	3.49226e+06	3974248	3.82405e+06	2818584	3.47772e+06	3.2187e+06	3537601	3.29113e+06	3043168	2.29095e+06	3241366
678.06	16.0989										nFla'nFlaB'PQC'UI'UIB		0	bp				0.3	0.38	4289542	pos416	0			pos	24	2.45603e+06	3.07779e+06	2752387	1.41648e+06	2023019	2.37322e+06	1265887	2.28236e+06	2.32385e+06	1.51712e+06	1.21678e+06	2934840	2.40738e+06	3.10019e+06	2.82828e+06	1.74005e+06	2.40618e+06	3.65234e+06	4.28954e+06	2.22132e+06	2.95303e+06	2367040	2829709
261.096	15.7039	C9H15N3O6	4	Ala-Asp-Gly	7	0	Peptides	-0.0687557	-41.8215	-0.0612606	nFla'nFlaB'PQC'UI'UIB	Ala-Asp-Gly	0	bp		0.7	xC13	0.25	0.25	4281523	pos393	0		H	posneg	24	2.11283e+06	2.22478e+06	3.33902e+06	2.82853e+06	2311289	2.07735e+06	2.69175e+06	2.00872e+06	2.56917e+06	2.25616e+06	4.28152e+06	2.89288e+06	2.45527e+06	2.51368e+06	2779379	2452848	2.76974e+06	3.06996e+06	3.30643e+06	2287105	2.05557e+06	2332345	3175994
555.391	7.15852										nFla'nFlaB'PQC'UI'UIB		0	bp				0.43	0.43	4271797	pos381	0			pos	24	1.42636e+06	2.00454e+06	1.39085e+06	1.68114e+06	2.38173e+06	1.84837e+06	1.28531e+06	2106127	2.12196e+06	2135292	4271797	2.78268e+06	1.77064e+06	2.15298e+06	1.5896e+06	2.61377e+06	1.76701e+06	2.45349e+06	2.15697e+06	2.09844e+06	2.10745e+06	1.76288e+06	2346396
211.142	5.20942				0.1						nFla'nFlaB'PQC'UIB		0	bp	xNH3			0.4	0.96	4269464	pos417	0			pos	24	1.49913e+06	1.21597e+06	1.51113e+06	1.19626e+06	989954	1.17907e+06	1.2357e+06	1.5691e+06	3.60839e+06	1.66025e+06	800548	305845	582342	538181	332552	887775	706398	1181764	4269464	2.81377e+06	988263	1959649	1.70721e+06
674.538	4.24271							3.05479			nFla'nFlaB'PQC'UI'UIB		0	bp				0.14	0.18	4234783	pos418	0			pos	24	2315011	3.37789e+06	3258717	3.47195e+06	3.89508e+06	2.7489e+06	2.48538e+06	2.96418e+06	3.12947e+06	2.60879e+06	4234783	2.93809e+06	3.39915e+06	3.79886e+06	3477673	3139992	2.4889e+06	3.30287e+06	2.85833e+06	2692586	2566073	2.54812e+06	2.57189e+06
267.044	14.4228				0.1						nFla'nFlaB'UI'UIB		0	bp	xK+			0.62	0.62	4232967	pos419	0			pos	23	2.60896e+06	1.57466e+06	1.8662e+06	2.20067e+06	2.40919e+06	3.55548e+06	1.77942e+06	2.41712e+06	2.02068e+06	3.06416e+06	0	3252340	2.54006e+06	2.8258e+06	1.68317e+06	1.88384e+06	3.77459e+06	4.23297e+06	2.24846e+06	2295183	3.14122e+06	3.59396e+06	2.2296e+06
260.081	12.5802		0		0.2			-0.577403	#N/A		nFla'nFlaB'PQC'UI'UIB	HEPES	0	bp				0.17	0.45	4218018	pos420	0		Na	pos	24	3.43884e+06	3.57817e+06	4.01515e+06	3289832	3.30669e+06	3.20335e+06	3.16939e+06	1.27808e+06	3.47007e+06	1.25177e+06	2448448	3784161	3500110	3.14271e+06	3747337	3.59204e+06	3.51562e+06	3.82879e+06	3.96224e+06	3.66359e+06	3.2296e+06	3.74404e+06	4218018
248.119	4.75299		0		#N/A			-0.572215	#N/A		PQC	Met-Val	0	bp				0.71	2.24	4214280	pos421	0		H	pos	8	806710	0	0	0	0	0	0	972616	0	0	4.21428e+06	1.37575e+06	1.16547e+06	1.69712e+06	935648	0	1.46247e+06	0	0	0	0	0	0
167.965	5.44466										nFla'nFlaB'PQC'UI'UIB		0	bp				0.59	0.59	4205453	neg113	0			neg	24	3.32501e+06	3.26776e+06	3.59578e+06	3.19972e+06	2.86702e+06	3.1502e+06	4205453	2616524	3239427	2.77322e+06	3826.41	2.90432e+06	2.73151e+06	2.4989e+06	3680368	2.92215e+06	3.22869e+06	3.02488e+06	2.57059e+06	3.15398e+06	2.80088e+06	3.57659e+06	3244873
517.315	4.25691		0		0.1			0.507753	#N/A		nFla'nFlaB'UI'UIB	LysoPC(16:0)	0	bp	xNa+			0.58	0.58	4170987	pos422	0		Na	pos	23	2825208	1.95343e+06	2.18184e+06	2.44585e+06	2.6628e+06	3151459	2.71555e+06	3.51078e+06	3.11389e+06	3339623	0	3272853	2.60321e+06	3.267e+06	2.4728e+06	3.82735e+06	2.01743e+06	2.46804e+06	3.39218e+06	3.38375e+06	4.17099e+06	2.70988e+06	3.25438e+06
759.635	6.47803										nFla'nFlaB'PQC'UI'UIB		0	bp				0.4	0.4	4155168	pos375	0			pos	24	1.92488e+06	3.08272e+06	2.13309e+06	1.60671e+06	4.15517e+06	1.32919e+06	1.34072e+06	1.77844e+06	1.85448e+06	1580900	3.49262e+06	2042930	1.50995e+06	1.85591e+06	1.44337e+06	1.32456e+06	1.80811e+06	2.23846e+06	3.03649e+06	1.81136e+06	1.89231e+06	1.13122e+06	1.7077e+06
306.578	17.2487				0.1						nFla'nFlaB'PQC'UI'UIB		0	bp	xC13			0.08	0.24	4152116	pos423	0			pos	24	3218019	2.84921e+06	3.17259e+06	4152116	3.74867e+06	2555108	2.3305e+06	2.48332e+06	3.60415e+06	2248245	3.36105e+06	3.57097e+06	3.20139e+06	3.59511e+06	3.90488e+06	2.12071e+06	2.06304e+06	2954328	3367505	2.97031e+06	1.95773e+06	2.52359e+06	2.90519e+06
301.298	7.17087	C18H39NO2	3	[SP amino(18:0/2:0)] 2S-aminooctadecane-1,3R-diol	7	0	Lipidmaps	1.39153	44.6149	1.48543	nFla'nFlaB'PQC'UI'UIB	[SP amino(18:0/2:0)] 2S-aminooctadecane-1,3R-diol	0	bp			x-H2O	0.23	0.23	4151956	pos424	0		H	pos	24	3.52087e+06	2.9962e+06	4151956	3523670	2.5944e+06	2.95334e+06	2.64989e+06	2.32987e+06	2.51736e+06	2.28084e+06	1.4491e+06	2.57293e+06	2.04028e+06	2.43992e+06	2.72156e+06	3.09078e+06	2.43575e+06	3.11042e+06	2.05042e+06	2.52816e+06	2.36418e+06	3.04427e+06	2.21847e+06
250.062	14.1069	C8H14N2O5S	2	gamma-L-Glutamyl-L-cysteine	8	Central	KEGG_Metacyc_HMDB	-1.25122	-15.131	-1.37268	nFla'nFlaB'PQC'UI'UIB	gamma-L-Glutamyl-L-cysteine	0	bp				0.22	0.37	4148620	pos425	0		H	posneg	24	3485628	3.67655e+06	3.27153e+06	2.53456e+06	4.14862e+06	1.29639e+06	707455	1.94252e+06	1.31482e+06	2049425	2553715	2.11355e+06	2360625	2449539	1.35418e+06	1.41385e+06	1.74725e+06	1719537	2.00234e+06	1.45198e+06	1.54271e+06	780006	1.38078e+06
145.983	5.71736										nFla'nFlaB'PQC'UI'UIB		0	bp				0.65	0.65	4143321	neg114	0			neg	24	3.0134e+06	2.43365e+06	3.83365e+06	2.83408e+06	2.3621e+06	2.6695e+06	4.14332e+06	2.12174e+06	2.76567e+06	1.9214e+06	42645.2	2400829	2.22461e+06	2.10279e+06	3.94589e+06	2.43678e+06	2.91074e+06	2.6141e+06	2.03634e+06	2.70495e+06	2.07554e+06	3.50063e+06	2974710
336.05	15.0347										nFla'nFlaB'PQC'UI'UIB		0	bp		C7	xC13x-H2O	0.68	0.68	4142246	neg115	0			neg	24	1.02253e+06	972589	1.47213e+06	907271	1.16768e+06	1.79396e+06	1.38631e+06	1.20886e+06	1.4143e+06	1473460	4.14225e+06	1.43609e+06	1.2406e+06	1.25357e+06	1.26637e+06	1.22159e+06	1.49027e+06	2.00607e+06	557593	1.19542e+06	1.74457e+06	1.5185e+06	753150
814.626	3.60459				0.1						nFla'nFlaB'PQC'UI'UIB		0	bp	xC13			0.09	0.16	4100722	pos426	0			pos	24	4.10072e+06	3193115	3921143	3.5269e+06	3.15265e+06	3143760	3.62783e+06	4.07915e+06	3856869	4.053e+06	2784323	2.7347e+06	2860297	2.96113e+06	3.37942e+06	4028490	3.38795e+06	2.68297e+06	3.5794e+06	3506247	3.69751e+06	3.52393e+06	3.31795e+06
308.159	20.2308	C12H24N2O7	1	psicoselysine	7	0	Metacyc	0.792732	12.5912	-2.13893	nFla'nFlaB'PQC'UI'UIB	psicoselysine	0	bp			xNa+x-H2O	0.35	0.35	4092708	pos427	0		H	posneg	24	1.53646e+06	1.47237e+06	1.70859e+06	1.84183e+06	3.10581e+06	1158587	1800547	1427154	1.92277e+06	1.84151e+06	4092708	2.61816e+06	2.0941e+06	2001280	1.94879e+06	1.96878e+06	2589655	1.63052e+06	1.98413e+06	1.15922e+06	1.24893e+06	1.00923e+06	1.78023e+06
704.049	19.9466										nFla'nFlaB'PQC'UI'UIB		0	bp		C33	xC13	0.05	0.21	4092278	pos428	0			pos	24	2856062	3.57288e+06	3.28881e+06	2.97746e+06	3.08605e+06	2601100	2.80374e+06	2975377	3.2189e+06	2.88289e+06	3.24204e+06	2.92284e+06	3.3015e+06	3.11359e+06	3164421	2.2986e+06	2.94344e+06	2.93526e+06	3.85964e+06	4.09228e+06	2.84749e+06	3.44636e+06	3499086
775.547	3.6879				0.2			-5.85312			nFla'nFlaB'PQC'UI'UIB		0	bp				0.11	0.23	4088156	neg116	0			negneg	24	2.70214e+06	2.70586e+06	3.57323e+06	3130254	3.37511e+06	2.79348e+06	2794853	1.96449e+06	3.82452e+06	2.99562e+06	3.56015e+06	2.70533e+06	2.74245e+06	3.03815e+06	3030956	4088156	3419462	3.16355e+06	3.62538e+06	3.0272e+06	2.02128e+06	3.06089e+06	3.25436e+06
398.137	16.0721		0		0.2			0.27591	#N/A	1.98387	nFla'nFlaB'PQC'UI'UIB	S-Adenosyl-L-methionine	0	bp				0.3	0.32	4083794	pos429	0		H	pos	24	2576942	2637350	2.34505e+06	2.75211e+06	3.05635e+06	2152938	2.37137e+06	2.29705e+06	1642255	2137438	810625	1.76002e+06	2.04694e+06	1.8924e+06	1.51709e+06	4.08379e+06	2.53069e+06	2.88444e+06	1890550	1.54337e+06	1.75165e+06	2.10445e+06	1.30457e+06
202.045	13.1822	C6H12O6	52	D-Glucose	8	Central	KEGG_Metacyc_HMDB	0.524957	-3.11895		nFla'nFlaB'PQC'UI'UIB	D-Glucose	0	bp				0.23	0.61	4074869	pos430	0		Na	posneg	24	2354731	2.35962e+06	1791079	2278925	2.23819e+06	1.45127e+06	821547	2.11069e+06	4.07487e+06	1.71334e+06	2.99365e+06	2.89999e+06	1980239	2.35847e+06	1.73664e+06	2.66626e+06	1.81092e+06	2.70655e+06	3977861	2.88505e+06	2.53423e+06	930004	2877168
167.965	8.00529										nFla'nFlaB'PQC'UI'UIB		0	bp				0.57	0.57	4063852	neg117	0			neg	24	3.77021e+06	3.65865e+06	3908618	3.72267e+06	3.41194e+06	3.5601e+06	4006122	3327689	3.39199e+06	3.19307e+06	5488.33	3498737	3.20177e+06	3.15482e+06	4063852	3540877	3.68092e+06	3159432	3.3505e+06	3442670	2.66541e+06	3480978	3219784
129.152	7.27555	C8H19N	2	Octylamine	7	0	KEGG	0.119619	16.2937	0.164539	nFla'nFlaB'PQC'UI'UIB	Octylamine	0	bp				0.15	0.15	4056589	pos431	0		H	pos	24	3.10253e+06	2.68849e+06	3.23158e+06	3.46463e+06	2510681	2.69808e+06	3.47816e+06	3153349	2.87693e+06	2.94006e+06	1.78382e+06	2.50872e+06	2.54172e+06	2.32138e+06	2.72932e+06	2.9522e+06	2.70878e+06	3192810	2.8287e+06	3.14053e+06	3.17264e+06	3.20996e+06	3.22754e+06
275.137	9.35364		0		0.1			-0.714811	#N/A		nFla'nFlaB'UI'UIB	Glutarylcarnitine	0	bp	x-H2O			0.98	0.98	4054729	pos346	0		H	pos	24	888902	995320	839597	699075	1.23124e+06	977155	815576	1.29733e+06	1.1366e+06	1.34277e+06	4.05473e+06	934698	717889	932228	748082	1.13204e+06	598657	1115915	793322	1.23687e+06	1.16075e+06	799197	905797
179.079	13.2663		0		#N/A			-0.401864	#N/A	-0.487283	nFlaB'PQC'UI'UIB	D-Glucosamine	0	bp				0.27	0.85	4027347	pos432	0		H	pos	24	1.10551e+06	1.04078e+06	939242	891528	4.02735e+06	993053	1.16337e+06	2.26374e+06	1.38665e+06	1.02038e+06	1.78514e+06	1.10347e+06	1202958	1.14497e+06	898349	994704	775617	1055440	1.17015e+06	1.12282e+06	855663	1.22308e+06	1119926
799.609	3.54986	C45H86NO8P	31	PE(40:2)	8	Central	0	-0.136763	-12.6804	-0.135905	nFla'nFlaB'PQC'UI'UIB	PE(40:2)	0	bp				0.21	0.21	4002451	pos433	0		H	pos	24	2653462	2.56926e+06	2801076	3384177	3.12755e+06	3.11632e+06	2433671	3055042	3.249e+06	2.40218e+06	4.00245e+06	2.66358e+06	2632921	2.9327e+06	2.4673e+06	2.77596e+06	2.58904e+06	3.29278e+06	3.16535e+06	2.62688e+06	3370252	3.1461e+06	2.96286e+06
133.074	6.49447	C5H11NO3	4	3-nitro-2-pentanol	7	0	Metacyc	0.100386	0.681294	0.0547947	nFla'nFlaB'PQC'UI'UIB	3-nitro-2-pentanol	0	bp				0.33	0.55	3967295	pos435	0		H	pospospos	24	3094590	3.96729e+06	2558902	2827226	2.80002e+06	2.16276e+06	1.3838e+06	3.00971e+06	2472861	2.93177e+06	1.73238e+06	2.0321e+06	921399	2.55507e+06	2.22375e+06	1.08795e+06	823728	1530638	2.73063e+06	1.46236e+06	1650263	1.00451e+06	1.5736e+06
129.079	6.97753		0		0.2			-0.255664	#N/A	-0.267739	nFlaB'PQC'UI'UIB	N4-Acetylaminobutanal	0	bp				0.4	0.87	3947709	pos437	0		H	pospos	24	785525	1.2301e+06	818991	3947709	952454	653401	754138	1.63867e+06	1.33164e+06	1.05856e+06	2142596	823259	985514	1.19268e+06	1.22401e+06	3.13325e+06	2.06592e+06	1.4989e+06	2234295	3.17978e+06	3.14592e+06	1.81928e+06	2153451
429.15	11.4743										nFla'nFlaB'PQC		0	bp		C19	xC13xNa+	0.64	0.64	3936442	pos438	0			posneg	15	2280455	3575712	1.85057e+06	2757850	3.93644e+06	2.72032e+06	1.25648e+06	2.77057e+06	2.24778e+06	3.90409e+06	3.92921e+06	1.59132e+06	1.59013e+06	1.78579e+06	616116	0	0	0	0	0	0	0	0
218.019	14.5296	C9H8O5	3	3-(3,4-Dihydroxyphenyl)pyruvate	8	Central	KEGG_Metacyc	0.100012	48.7709		nFla'nFlaB'UI'UIB	3-(3,4-Dihydroxyphenyl)pyruvate	0	bp				0.59	0.71	3896378	pos439	0		Na	pos	23	1.17116e+06	1.57199e+06	1.8304e+06	2.31661e+06	1.48755e+06	951112	720025	2.43263e+06	3.89638e+06	1.30269e+06	0	2.33251e+06	2117020	2.10049e+06	1.46064e+06	1.62211e+06	1.13073e+06	1.44764e+06	2.62494e+06	2.61018e+06	1.05557e+06	814753	3111307
772.851	14.5732				0.4						nFla'nFlaB'UI'UIB		0	bp				0.83	0.83	3893024	pos440	0			pos	23	1.31825e+06	1.92481e+06	3.8332e+06	2.74522e+06	1.1107e+06	944096	3145912	1.04499e+06	2.06549e+06	683741	0	1.13552e+06	2.09478e+06	1.5021e+06	3893024	1.40284e+06	1.30157e+06	853373	2.45414e+06	1.39349e+06	193142	1.65275e+06	3069699
174.016	18.5711		0		0.1			-0.272699	#N/A		nFla'nFlaB'PQC'UI'UIB	cis-Aconitate	0	bp	x-H2O	0.2	x-CO2xC13	0.02	0.13	3872968	neg120	0		H	neg	24	1.84805e+06	2.11461e+06	2.16617e+06	1.85648e+06	2.07974e+06	2.49833e+06	2154863	2.1922e+06	2872135	2.67595e+06	3.06406e+06	3.02765e+06	2.96274e+06	3.01768e+06	2922064	2815237	3.43091e+06	3.87297e+06	3.26121e+06	3.28678e+06	3.18002e+06	2.75071e+06	3.37224e+06
336.165	18.7255	C12H21N3O7	2	Glu-Ala-Thr	7	0	Peptides	0.379934	0.0810153		nFla'nFlaB'PQC'UI'UIB	Glu-Ala-Thr	0	bp				0.14	0.3	3870097	pos441	0		NH3	pos	24	1.40384e+06	2.91048e+06	3.21492e+06	2762092	3.6505e+06	2.83859e+06	3.62862e+06	3666671	3.0893e+06	3.00157e+06	3561041	3.13962e+06	2.73431e+06	2.64034e+06	2.54477e+06	3.8701e+06	3717431	3.63388e+06	2790018	2.55201e+06	2.42966e+06	3.00038e+06	3.4267e+06
314.145	18.8955										nFla'nFlaB'PQC'UI'UIB		0	bp		C12	xC13	0.22	0.36	3865315	pos442	0			pos	24	1.8127e+06	2.01732e+06	1.86121e+06	1586457	3138540	2.08558e+06	2.36138e+06	2586456	2.1963e+06	2.93417e+06	3.25542e+06	2.7627e+06	2.34439e+06	2.22441e+06	1.83894e+06	2.18713e+06	3.86531e+06	3.62101e+06	1.802e+06	1.60337e+06	2.07381e+06	1.70161e+06	1.71546e+06
249.17	4.05229				0.1						nFla'nFlaB'UI'UIB		0	bp	xNa+			0.64	0.64	3856992	pos443	0			pos	23	3.13545e+06	1.93215e+06	3.85699e+06	3.16701e+06	2.03915e+06	1.95081e+06	3.13887e+06	1.88854e+06	2.19632e+06	1.78601e+06	0	3.02624e+06	1.84413e+06	2628361	3.72512e+06	3.41271e+06	2.53429e+06	1.64407e+06	2543003	2.76761e+06	1.67116e+06	1.89631e+06	3.5447e+06
233.07	3.24639							3.75592			nFla'nFlaB'PQC'UI'UIB		0	bp				0.26	0.26	3855348	pos444	0			pos	24	3.31132e+06	3.39058e+06	3.01464e+06	2.86045e+06	3.85535e+06	2.49161e+06	3.25112e+06	3.6642e+06	3737186	3634853	1.54105e+06	3.45834e+06	2.75525e+06	3040710	3.01159e+06	3.54439e+06	3.12957e+06	3368986	3.31415e+06	2988234	3.23206e+06	2.66185e+06	3328821
661.956	10.5727										nFla'nFlaB'UI'UIB		0	bp				0.63	0.63	3839648	neg121	0			neg	23	3018683	2.93619e+06	3.83965e+06	3.02269e+06	2.2003e+06	2665702	3.71825e+06	2508646	3053127	2.66698e+06	0	3.08401e+06	2.2746e+06	1.95214e+06	3.47144e+06	2.59419e+06	2.6407e+06	2.29379e+06	2.24257e+06	2.68738e+06	2285414	3.10842e+06	3221866
704.933	15.4223										nFla'nFlaB'PQC'UI'UIB		0	bp				0.12	0.29	3836746	pos445	0			pos	24	2.55899e+06	2.64817e+06	3.69191e+06	2.55368e+06	2.54571e+06	2.69465e+06	1.77951e+06	2.59096e+06	3836746	2.32809e+06	2.58959e+06	2325241	2.69807e+06	2838679	3.19906e+06	2.26363e+06	1.90584e+06	2.57876e+06	3.56271e+06	3.21211e+06	2.24088e+06	1.9578e+06	2.89238e+06
188.116	11.5607		0		0.2			-0.0887726	#N/A	-0.0800724	nFla'nFlaB'PQC'UI'UIB	N6-Acetyl-L-lysine	0	bp		2.3	xC13	0.21	0.26	3824136	pos447	0		H	pospos	24	2.83566e+06	2.43308e+06	2.07301e+06	2.15138e+06	1.30987e+06	3.49563e+06	2.55598e+06	3.21124e+06	3.37093e+06	3.35068e+06	1377196	2.55436e+06	2.17477e+06	2.32555e+06	1.97062e+06	3.03784e+06	3.26008e+06	3824136	2.95444e+06	2.75857e+06	3.59846e+06	3257211	2.86589e+06
261.132	17.4723	C10H19N3O5	5	Gammaglutamylornithine	7	0	HMDB	-0.679009	-20.7714	-0.714081	nFla'nFlaB'PQC'UI'UIB	Gammaglutamylornithine	0	bp		3.9	xC13xNa+	0.15	0.18	3783490	pos448	0		H	pos	24	1.76099e+06	1.90675e+06	2.37629e+06	2.43198e+06	2.39526e+06	1.86122e+06	1.71847e+06	1.96648e+06	2696516	2.15919e+06	3783490	3.06325e+06	2.95395e+06	2877568	2.57369e+06	2443935	2.41206e+06	2.35292e+06	2.37559e+06	2474869	2.19902e+06	1.87368e+06	2361150
139.003	14.3748				0.1						nFla'nFlaB'PQC'UI'UIB		0	bp	xACN			0.04	0.14	3754180	pos450	0			pos	24	2730792	2.31248e+06	2.67597e+06	2.70272e+06	2.62545e+06	2597129	2.89737e+06	2.98636e+06	2.7072e+06	3355452	3.04459e+06	2.97189e+06	2767551	2.77078e+06	2.93312e+06	2.98137e+06	2.87501e+06	3.18629e+06	2.88634e+06	2.74851e+06	3.15832e+06	2756283	3754180
329.239	3.53232										nFla'nFlaB'PQC'UI'UIB		0	bp				0.22	0.37	3750209	pos451	0			posneg	24	1.96032e+06	1.33525e+06	1611005	1.37303e+06	1.55427e+06	1.92858e+06	1.33646e+06	1.75778e+06	1.68378e+06	1.98211e+06	3.75021e+06	2816718	2011303	2.99384e+06	2.62257e+06	799352	1.71952e+06	2.20211e+06	1.9152e+06	1.60193e+06	1.26006e+06	1.52644e+06	1.5279e+06
105.079	17.8261	C4H11NO2	2	Diethanolamine	10	Central	KEGG_HMDB	0.681652	-3.61691	0.847532	nFla'nFlaB'PQC'UI'UIB	Diethanolamine	0	bp				0.11	0.51	3712933	pos452	0		H	pos	24	2.37976e+06	1.83107e+06	2.59282e+06	1.84003e+06	3.71293e+06	1.34992e+06	3484448	2.38279e+06	2.52709e+06	2.36958e+06	2.53143e+06	2.37321e+06	2.19581e+06	2935340	2.35284e+06	2401308	2.24266e+06	2.09852e+06	429702	2.53725e+06	1.60158e+06	2.36498e+06	506103
409.562	18.7294										nFla'nFlaB'PQC'UI'UIB		0	bp				0.05	0.22	3702122	pos454	0			pos	24	1.94861e+06	2.86141e+06	2.29113e+06	1.90605e+06	2.56259e+06	1.77382e+06	1.49693e+06	2.45719e+06	1.8499e+06	1.81245e+06	2.47927e+06	2.55549e+06	2.72278e+06	2763889	2.76284e+06	2190598	3.25624e+06	3.60617e+06	3.70212e+06	1.8889e+06	1.96782e+06	2.42331e+06	1.95015e+06
233.07	18.5655				0.1			3.74305			nFla'nFlaB'PQC'UI'UIB		0	bp	xNa+			0.09	0.22	3671928	pos455	0			pos	24	2.27851e+06	2.3222e+06	2.64054e+06	2.35861e+06	2.39669e+06	2712513	3.5635e+06	2.91088e+06	2706334	2.95484e+06	3.07619e+06	2671003	2603493	2.44503e+06	2768482	3.51139e+06	3.67193e+06	2.92383e+06	2.15849e+06	2865092	2.60074e+06	2661330	2.23163e+06
193.095	12.2349	C7H12O5	7	3-Propylmalate	8	Central	KEGG_Metacyc_Lipidmaps	2.55506	12.0592		nFlaB'PQC'UI'UIB	3-Propylmalate	0	bp				0.17	1.08	3671674	pos456	0		NH3	pos	24	725579	647089	430202	826923	3.67167e+06	1.14211e+06	1.85079e+06	2.47817e+06	1.61084e+06	556656	1.23537e+06	1.07526e+06	997577	1.01973e+06	758972	410641	215625	379854	374395	1.19674e+06	265169	1.43604e+06	427055
287.196	11.5969	C12H25N5O3	2	Ile-Arg	7	0	Peptides	0.773508	-0.750624		nFla'nFlaB'PQC'UI'UIB	Ile-Arg	0	bp				0.56	0.56	3664889	pos453	0		H	pos	24	1.17042e+06	1.11177e+06	813113	954827	1.71361e+06	1.39996e+06	867075	1.47856e+06	957531	1.50594e+06	3.66489e+06	1.71483e+06	1.39271e+06	1.4473e+06	1.0517e+06	1.90779e+06	2.11708e+06	1.80997e+06	1.37087e+06	999175	1.02624e+06	1444321	1.11913e+06
671.619	7.6175		0		0.1			-0.210914	#N/A		nFla'nFlaB'PQC'UI'UIB	[SP (24:0)] N-(tetracosanoyl)-sphing-4-enine	0	bp	xNa+	2	xC13	0.43	0.43	3661317	pos461	0		Na	pos	24	2331712	1.98052e+06	1.71642e+06	2513475	2.0315e+06	2.13192e+06	2.21708e+06	1.93821e+06	2.01752e+06	1.94175e+06	705190	2.20556e+06	1.26171e+06	2.52718e+06	1.99599e+06	3.34265e+06	1.25603e+06	1.86971e+06	2.14992e+06	2.44272e+06	3.22949e+06	3.66132e+06	2.42978e+06
118.074	9.39889		0		#N/A			0.114555	#N/A	0.163546	nFla'nFlaB'PQC'UI'UIB	L-2,4-Diaminobutanoate	0	bp				0.22	0.22	3660381	pos411	0		H	pos	24	2.61719e+06	2.43312e+06	2.46772e+06	1.85583e+06	3.15197e+06	2.56093e+06	2.03756e+06	3028149	2.56107e+06	2930972	3.05673e+06	2.914e+06	1.67519e+06	2.42673e+06	2.35928e+06	3.47274e+06	2.15586e+06	3660381	2.94064e+06	3.00632e+06	2.86104e+06	2.41972e+06	2.75926e+06
230.073	7.20749										nFla'nFlaB'PQC'UI'UIB		0	bp				0.29	0.48	3647539	pos462	0			posneg	24	3.0073e+06	1.88982e+06	2.6477e+06	1.74468e+06	2.26772e+06	2722755	1.76436e+06	722832	3.54449e+06	3.11114e+06	3.64754e+06	2.42397e+06	2.38006e+06	2.36061e+06	1.65667e+06	1.55411e+06	2918450	2.33389e+06	2.59832e+06	2.42046e+06	3.37627e+06	1.85545e+06	1.75107e+06
262.135	4.72526		0		#N/A			-0.601805	#N/A		nFla'nFlaB'PQC'UI	Ile-Met	0	bp				0.59	1.13	3626086	pos464	0		H	posneg	22	1560867	1.37863e+06	425204	277934	1.80359e+06	1.05177e+06	772243	1.00008e+06	366334	1.61392e+06	3.62609e+06	1.49913e+06	973207	1649593	1.22024e+06	1.00591e+06	1.38751e+06	1.77226e+06	965734	0	2.10471e+06	1.10952e+06	0
243.072	11.2306	C8H15NO6	7	N-Acetyl-D-glucosamine	10	Central	KEGG_Metacyc_HMDB	-0.370643	0.361494		nFla'nFlaB'PQC'UI'UIB	N-Acetyl-D-glucosamine	0	bp				0.21	0.3	3625964	pos465	0		Na	pos	24	1.99064e+06	2.32788e+06	1.90625e+06	1.99067e+06	3.62596e+06	2.29697e+06	1.65386e+06	2319000	2.08753e+06	2761487	3.10851e+06	2.83535e+06	2.49509e+06	2699918	1.68223e+06	2.79075e+06	2111354	2212110	2.16949e+06	2158039	2237545	2.08002e+06	2.2264e+06
220.986	14.6182		0		#N/A			0.2527	#N/A		nFla'nFlaB'UI'UIB	O-Phospho-L-serine	0	bp		2.2	xCl37xC13	0.56	0.56	3602746	neg124	0		Cl	neg	23	1.86044e+06	2.01706e+06	2.44091e+06	2.46271e+06	2.20856e+06	2.54086e+06	2.10544e+06	2260404	3.014e+06	2.27503e+06	0	3010667	3.31139e+06	3.1482e+06	3.01071e+06	3301132	3.41205e+06	3.60275e+06	3.33359e+06	2.64697e+06	2.31842e+06	2.39621e+06	3.02849e+06
194.115	6.23375				0.2						nFla'nFlaB'PQC'UI'UIB		0	bp				0.6	0.6	3599880	pos466	0			pos	24	787386	1.7749e+06	3.1476e+06	3599880	1.42459e+06	1.71335e+06	1.35096e+06	1773974	3107529	2.37242e+06	822519	806189	2.34834e+06	3226100	1.46096e+06	2.49256e+06	1.42524e+06	1.02345e+06	2.67119e+06	1.17074e+06	702875	2.09149e+06	2.66118e+06
255.705	4.8136	C21H36N7O16P3S	1	CoA	8	Central	KEGG_Metacyc_HMDB	0.193126	0		nFla'nFlaB'PQC'UI'UIB	CoA	0	bp				0.07	0.17	3597432	neg125	0		3-charge	neg	24	2.50667e+06	2293596	2.63553e+06	2.37394e+06	1.92936e+06	3221183	2465622	2564631	2.85545e+06	3044679	2374513	2829848	2.67783e+06	2772960	2.67106e+06	2.2165e+06	2.84963e+06	3157165	3.32274e+06	3383146	3.59743e+06	3322867	3.06582e+06
338.338	4.2717										nFla'nFlaB'PQC'UI'UIB		0	bp				0.25	0.49	3591527	pos467	0			pos	24	3477161	1.93473e+06	3.59153e+06	2899706	1631541	3.28422e+06	1.22501e+06	1.66206e+06	983668	2.45603e+06	1.62742e+06	2.60222e+06	3.07012e+06	3.36293e+06	3.07393e+06	1.49081e+06	2989629	1.70145e+06	1.3277e+06	2.27763e+06	2.22208e+06	1.56953e+06	2.6633e+06
820.52	3.54601										nFla'nFlaB'PQC'UI'UIB		0	bp				0.08	0.25	3584938	neg126	0			neg	24	2.91317e+06	3.58494e+06	2.80505e+06	2.23224e+06	2779683	2.41319e+06	1.81399e+06	2.72046e+06	2464501	2.38063e+06	2.77083e+06	3.39646e+06	2.98286e+06	2.94881e+06	3.18247e+06	2.3748e+06	1.39312e+06	1.74375e+06	1497930	2.86887e+06	2259573	2.32798e+06	2.86581e+06
464.338	7.17556				0.4						nFla'nFlaB'UI'UIB		0	bp				0.91	0.91	3502941	pos468	0			pos	22	1.97988e+06	2.12122e+06	2.8761e+06	2.57531e+06	2.39527e+06	2.25115e+06	2.01734e+06	2.33976e+06	2.58664e+06	2.47451e+06	0	0	2.10316e+06	2064231	2.02429e+06	3502941	2.47095e+06	3482341	2.52605e+06	2.5874e+06	2.67248e+06	2.4735e+06	2.47409e+06
250.039	3.72119										nFla'nFlaB'PQC'UI'UIB		0	bp				0.18	0.28	3486029	pos469	0			posneg	24	3.48603e+06	2.53556e+06	2.00262e+06	1759049	2284280	2.38744e+06	1.71346e+06	1.74385e+06	1.65976e+06	1.81882e+06	2.51525e+06	2.87788e+06	2.52141e+06	1.97788e+06	1.84171e+06	2.23669e+06	2.10401e+06	1.81901e+06	2998858	1.39533e+06	1.49215e+06	1.22601e+06	1.5233e+06
282.882	14.8774										nFla'nFlaB'UI'UIB		0	bp			xCl37xK+	0.58	0.58	3475783	pos470	0			pos	23	2.20759e+06	3.3867e+06	3.47578e+06	2581458	3.03988e+06	1.89144e+06	2.51448e+06	2.69337e+06	2177178	2.30871e+06	0	2294595	3.0513e+06	2994988	3.10485e+06	2002010	1.9703e+06	2311594	1.31877e+06	1.43826e+06	1.38548e+06	1068412	1.47284e+06
185.009	14.654		0		0.1			0.0257844	#N/A	-1.09526	nFla'nFlaB'UI'UIB	O-Phospho-L-serine	0	bp	xK+	2.5	x2-merxC13	0.62	0.75	3466093	neg128	0		H	neg	23	2.00253e+06	1.03445e+06	1.25709e+06	671565	1.27412e+06	2.41751e+06	2.07778e+06	1.10783e+06	758459	1839632	0	741349	1.04881e+06	868752	1.32266e+06	1.11891e+06	2.60626e+06	2.3218e+06	489407	605211	1.38966e+06	3.46609e+06	619506
228.163	27.8248										nFla'nFlaB'PQC'UI'UIB		0	bp				0.02	0.05	3440822	pos471	0			pos	24	3275415	3.43853e+06	3.00177e+06	3.17272e+06	3.3534e+06	3281342	3.27024e+06	3.44082e+06	3.18218e+06	3420346	3.15005e+06	3.09398e+06	3255867	3.19156e+06	3120627	3275235	3263497	3.32504e+06	3.3951e+06	3.41679e+06	3.19365e+06	3.12689e+06	3.27784e+06
745.559	5.81958							-4.51778			nFla'nFlaB'PQC'UI'UIB		0	bp				0.25	0.25	3432152	pos472	0			pos	24	2.10838e+06	2.2622e+06	1.95629e+06	1949998	2.29875e+06	1.51196e+06	1312155	1.95804e+06	1.99667e+06	1.85207e+06	3.43215e+06	2113752	2241475	2455766	1.84859e+06	1.3516e+06	2.00657e+06	2.33146e+06	2.14808e+06	1.61354e+06	2.0498e+06	1.37924e+06	1670468
240.147	11.9459	C12H20N2O3	2	Slaframine	7	0	KEGG	-0.296012	33.1263	-0.305155	nFla'nFlaB'PQC'UI'UIB	Slaframine	0	bp		0.8	xC13	0.08	0.17	3425416	pos473	0		H	pos	24	2.10569e+06	2.22364e+06	2.5744e+06	2658896	2.11509e+06	2.41853e+06	2.04717e+06	2.1755e+06	3.08921e+06	2.30062e+06	2.62823e+06	2.90992e+06	3.03187e+06	2.83154e+06	2.43949e+06	2.51874e+06	2.76808e+06	2886068	3.42542e+06	2.76391e+06	2564021	2.37555e+06	3.34579e+06
101.121	14.8114	C6H15N	3	Hexylamine	7	0	KEGG_Metacyc	0.578398	49.5384	0.731182	nFla'nFlaB'PQC'UI'UIB	Hexylamine	0	bp				0.1	0.72	3386703	pos449	0		H	pos	24	413047	1.86008e+06	2.52382e+06	2.96702e+06	914880	449436	967417	1.28676e+06	2.46365e+06	521508	3386703	3.19974e+06	2.96361e+06	2730714	2.71773e+06	2.75551e+06	653913	800394	2.80459e+06	3.24275e+06	677688	457690	2.95213e+06
200.009	12.7629	C4H9O7P	4	D-Erythrose 4-phosphate	8	Central	KEGG_Metacyc_HMDB	0.788288	-12.4552	1.09907	nFla'nFlaB'PQC'UI'UIB	D-Erythrose 4-phosphate	0	bp			xNa+	0.35	0.35	3385683	pos476	0		H	posneg	24	1.81871e+06	2.95606e+06	2.14135e+06	1541562	3.38568e+06	836940	847919	1502973	1.19125e+06	1.57947e+06	2.38506e+06	1.48655e+06	1.49304e+06	1.58504e+06	839447	940629	1.00376e+06	880475	1.11123e+06	952662	805207	532701	1.16178e+06
852.788	9.20121										nFla'nFlaB'UI'UIB		0	bp				0.63	0.63	3370932	pos477	0			pos	23	2.33564e+06	2252939	2.72547e+06	2.32172e+06	1.8426e+06	2.10716e+06	3370932	1.83037e+06	2312266	1.36924e+06	0	1.9586e+06	1.57183e+06	1.51381e+06	2.59709e+06	2048354	2241167	2.15226e+06	1.91431e+06	1.98955e+06	1.35634e+06	2412352	2.46613e+06
708.928	25.0227										nFla'nFlaB'PQC'UI'UIB		0	bp				0.57	0.57	3362650	pos478	0			pos	24	936574	1.19979e+06	1.33837e+06	1.63188e+06	1.78999e+06	1.32105e+06	2469309	1.60377e+06	1.53512e+06	1485171	3.36265e+06	1.84108e+06	1.32637e+06	1.18405e+06	882254	2.38791e+06	1.95772e+06	1.35281e+06	907712	1.04206e+06	846930	1.66245e+06	1478156
583.152	14.5486										nFla'nFlaB'UI'UIB		0	bp				0.66	0.66	3350460	pos479	0			pos	23	1.23571e+06	1.05614e+06	889751	779874	1.99695e+06	2.53495e+06	838214	1.69102e+06	1.21695e+06	2.21835e+06	0	2.27334e+06	1.57096e+06	2.18212e+06	1.03999e+06	1.97984e+06	2.70643e+06	3.35046e+06	1.23574e+06	1.79838e+06	2.97753e+06	2088050	817933
265.072	8.51593				0.1			-3.71754			nFla'nFlaB'PQC'UI'UIB		0	bp	xNa+			0.53	0.53	3344516	pos480	0			pos	24	2.38832e+06	2.79434e+06	2.50933e+06	2006710	2.7245e+06	2.4429e+06	2.66814e+06	2.54619e+06	2.54636e+06	2823509	213599	2.8258e+06	2551240	3.34452e+06	2.57341e+06	3.02706e+06	2.11061e+06	2.42542e+06	2386521	2595292	2.69824e+06	2634302	2.34505e+06
661.564	3.4517	C41H72O5	15	DG(38:4)	8	Central	Lipidmaps_HMDB	-0.52447	-15.8849		nFla'nFlaB'PQC'UI'UIB	DG(38:4)	0	bp				0.15	0.19	3333335	pos481	0		NH3	pos	24	1.45801e+06	1.7671e+06	1.39735e+06	2.17198e+06	1.59592e+06	2562777	1.92827e+06	2.53028e+06	2771452	2.01638e+06	2.31827e+06	1.56312e+06	1.7963e+06	1.95978e+06	2.12903e+06	2.9501e+06	2.24041e+06	2422646	2536699	2433469	2.65003e+06	2.37719e+06	3083311
509.117	15.0778		0		0.4			-0.682796	#N/A		nFla'nFlaB	Carmine	0	bp				1.15	1.15	3322160	pos482	0		NH3	pos	15	1.03486e+06	1.36345e+06	1.24833e+06	1.33682e+06	1.00724e+06	805322	848096	703802	708107	1.02226e+06	3.32216e+06	459262	518817	499329	628681	0	0	0	0	0	0	0	0
147.973	11.0543										nFla'nFlaB'PQC'UI'UIB		0	bp				0.41	0.42	3313427	neg133	0			neg	24	1.87876e+06	1.2427e+06	1.07219e+06	1.52525e+06	2.58587e+06	1.0918e+06	2422669	3.24218e+06	2.98161e+06	3.31343e+06	1.01992e+06	2.83109e+06	2.94599e+06	2935240	1.46387e+06	3.06411e+06	1.58739e+06	1.40093e+06	3.2999e+06	3.03868e+06	1.62785e+06	2.34355e+06	1.83918e+06
488.108	14.8579	C14H26N4O11P2	1	CDP-choline	10	Central	KEGG_Metacyc_HMDB	0.923687	0.314504	-1.16093	nFla'nFlaB'PQC'UI'UIB	CDP-choline	0	bp			x2+xK+	0.33	0.33	3290337	pos483	0		H	pos	24	2.34289e+06	2.53832e+06	2.51795e+06	1.92588e+06	3.29034e+06	2.01696e+06	1.87842e+06	2.30686e+06	1.88269e+06	1.9256e+06	3.09319e+06	1.84108e+06	1.56642e+06	1.65833e+06	1.63117e+06	1364607	1.604e+06	2.25196e+06	1.11347e+06	1.12855e+06	1.44689e+06	1.52791e+06	945880
223.106	11.7694		0		0.4			0.00833409	#N/A		nFla'nFlaB'UI'UIB	N-acetyl -D- glucosaminitol	0	bp			x-FAxNa+	1.05	1.05	3280671	pos484	0		H	posneg	24	328130	494096	395207	441514	784634	587395	417916	595579	639766	772348	3.28067e+06	738426	692546	806538	236161	727005	659220	861053	746416	495185	573007	505383	509802
259.178	7.18011	C13H25NO4	2	Hexanoylcarnitine	7	0	HMDB	-0.364172	30.0579	-0.377389	nFla'nFlaB'PQC'UI'UIB	Hexanoylcarnitine	0	bp				0.13	0.25	3263117	pos486	0		H	pos	24	1.69092e+06	1.40185e+06	2606996	1.74371e+06	1.66395e+06	2.91749e+06	2.17966e+06	2181172	2.69982e+06	1.94986e+06	2128043	2.0878e+06	1.99831e+06	2228290	1.54419e+06	2689651	1.94258e+06	3.26312e+06	2220019	2.63325e+06	2365575	2.66191e+06	2.95029e+06
636.663	7.56685				0.1						nFla'nFlaB'PQC'UI'UIB		0	bp	xC13			0.29	0.36	3257654	pos487	0			pos	24	1.94688e+06	1.93499e+06	1.68901e+06	1.78115e+06	2173309	893823	1.37684e+06	2.27568e+06	1582267	2271259	3.25765e+06	2.34221e+06	1.49823e+06	2392856	1.83853e+06	1759925	1.97394e+06	1.90465e+06	2.00191e+06	1.8984e+06	2287953	1.81472e+06	1.81758e+06
136.064	22.8652		0		#N/A			0.0394823	#N/A		nFla'nFlaB'PQC'UI'UIB	1-Methylnicotinamide	0	bp		-0.1	xC13	0.17	0.8	3223223	pos489	0		H	pos	24	1.67083e+06	2.06155e+06	2418265	130435	2171310	2.76667e+06	2.09234e+06	2.18284e+06	81537.6	2.17163e+06	1.26898e+06	1.25163e+06	1.59251e+06	1.86735e+06	1.60534e+06	2.46653e+06	2.79548e+06	3223223	65147.3	382212	2.38984e+06	1.98453e+06	57920
122.037	7.17438		0		#N/A			0.264077	#N/A		nFla'nFlaB'PQC'UI'UIB	4-Hydroxybenzaldehyde	0	bp				0.17	0.28	3218332	neg119	0		H	neg	24	2.45474e+06	2.00255e+06	1972542	1.7896e+06	3031799	2229819	1.36239e+06	2.16607e+06	2.42337e+06	1.4985e+06	1.13276e+06	1.20282e+06	909813	1.01113e+06	780860	2951469	2.53859e+06	3.21833e+06	1.5761e+06	2.80147e+06	1.77233e+06	2.16109e+06	1.66353e+06
207.957	31.9201										nFla'nFlaB'PQC'UI'UIB		0	bp				0.08	0.45	3216700	neg134	0			neg	24	1.13262e+06	1.67363e+06	1899433	2.57039e+06	1478403	1.21464e+06	1.62779e+06	1.59576e+06	2.38947e+06	1.29576e+06	2395427	2.22929e+06	2142161	2.08027e+06	1.90599e+06	2.04303e+06	1.55265e+06	1.3666e+06	3.2167e+06	2.13912e+06	1.1634e+06	1165717	3.15425e+06
123.051	6.58011				0.2						nFla'nFlaB'PQC'UI'UIB		0	bp				0.64	0.64	3203966	pos491	0			pospos	24	1.46633e+06	1.42523e+06	639732	946141	840363	866320	834528	1.85159e+06	1.85683e+06	1.29016e+06	1.49328e+06	1.26086e+06	373582	1.70137e+06	3.20397e+06	1.7972e+06	743671	1.34697e+06	2.09891e+06	438644	937789	809137	1.00077e+06
234.941	15.3683										nFla'nFlaB'UI'UIB		0	bp				0.58	0.58	3203043	neg135	0			neg	23	2.28398e+06	1.78196e+06	1.58869e+06	1.37145e+06	2.45471e+06	3061500	2.09086e+06	2.65863e+06	2.01775e+06	3.20304e+06	0	2366235	2.80573e+06	2818008	2.16313e+06	2.0432e+06	2.81608e+06	3.05563e+06	1569374	2.03915e+06	3.13133e+06	2.82374e+06	1.38219e+06
303.241	3.72664	C16H30O4	2	2,3-Dihydroxycyclopentaneundecanoic acid	7	0	KEGG	1.50757	-21.6731		nFla'nFlaB'PQC'UI'UIB	2,3-Dihydroxycyclopentaneundecanoic acid	0	bp				0.28	0.43	3202158	pos492	0		NH3	pos	24	2.23442e+06	1.65274e+06	716567	3006670	2.0701e+06	1.75806e+06	2.22201e+06	1.84524e+06	3.20216e+06	1.95516e+06	1.0579e+06	1.76172e+06	1162506	2098383	1.52014e+06	2.35093e+06	2.22501e+06	2.09571e+06	2913771	2.67785e+06	1526381	2.03404e+06	1932993
189.064	14.2174	C7H11NO5	4	N-Acetyl-L-glutamate	10	Central	KEGG_Metacyc_HMDB	0.0754396	0.512063	0.12067	nFla'nFlaB'PQC'UI'UIB	N-Acetyl-L-glutamate	0	bp		0.8	xC13	0.32	0.32	3190502	neg136	0		H	neg	24	1.58789e+06	1.78312e+06	1.13171e+06	1.55609e+06	1.9223e+06	2.45026e+06	902853	2.13944e+06	2456857	2.37486e+06	3077390	2.58609e+06	2.22937e+06	2.49833e+06	1.10085e+06	2.23276e+06	2.3383e+06	3190502	2.43906e+06	2547998	2.88161e+06	1.95746e+06	1.99623e+06
591.927	15.9245										nFla'nFlaB'PQC'UI'UIB		0	bp		C26	xC13	0.26	0.3	3186895	pos493	0			pos	24	1.64031e+06	2.01273e+06	2334190	2.0995e+06	1.5799e+06	1.85959e+06	1.13593e+06	2.37321e+06	2130272	1.63039e+06	1.12309e+06	2.213e+06	2455986	2.01226e+06	2.30492e+06	1.55369e+06	2.08131e+06	2.49999e+06	3.1869e+06	2.45475e+06	1.79672e+06	1.95913e+06	2822678
183.02	7.18858		0		#N/A			0.236728	#N/A		nFla'nFlaB'PQC'UI'UIB	L-Homocysteic acid	0	bp		-0.5	xC13xS34	0.19	0.26	3160901	neg137	0		H	neg	24	1.62827e+06	1.30844e+06	1.4661e+06	1.92837e+06	1.21574e+06	2.40222e+06	2.2658e+06	2.06019e+06	2.08424e+06	1.77935e+06	2.97081e+06	2.89959e+06	2.29424e+06	2.01205e+06	2.00122e+06	2.89838e+06	2662934	3.1609e+06	1.62105e+06	2.39807e+06	2.38707e+06	2557085	1926276
251.102	7.50157	C10H13N5O3	4	Deoxyadenosine	10	Central	KEGG_Metacyc_HMDB	-0.258029	2.43327		nFla'nFlaB'PQC'UI'UIB	Deoxyadenosine	0	bp				0.31	0.37	3160292	pos494	0		H	pos	24	2.40816e+06	3160292	2.60768e+06	1.79427e+06	2.74222e+06	1.69675e+06	1.63782e+06	1.94676e+06	1.84088e+06	2.23639e+06	1.62414e+06	1.60322e+06	686942	1.78341e+06	1.38164e+06	690085	246903	528124	521283	626683	586687	587250	647436
172.146	3.87348	C10H20O2	24	Decanoic acid	10	Central	KEGG_Metacyc_Lipidmaps_HMDB	0.207068	0.476423	0.306371	nFla'nFlaB'PQC'UI'UIB	Decanoic acid	0	bp		1.2	xC13	0.02	0.24	3157165	neg138	0		H	neg	24	2.48605e+06	2.51373e+06	2.084e+06	2.50095e+06	2250887	2.46048e+06	2.0033e+06	3.15717e+06	2.8985e+06	1.72383e+06	1.55847e+06	1.59133e+06	1.61312e+06	1.63126e+06	1.63275e+06	2226454	2.97712e+06	2.04822e+06	2275824	2.45719e+06	2.46039e+06	2204996	2.37139e+06
356.14	3.52416	C19H23FO4	1	9-Fluoro-16alpha-hydroxyandrost-4-ene-3,11,17-trione	7	0	KEGG	0.00768327	-43.4493		nFla'UI'UIB	9-Fluoro-16alpha-hydroxyandrost-4-ene-3,11,17-trione	0	bp				0.57	0.6	3136783	pos495	0		Na	pos	22	2687924	1.49736e+06	2.61835e+06	809194	3.13678e+06	1.43409e+06	2.05141e+06	0	1.49403e+06	2.02891e+06	0	1.9082e+06	1.88721e+06	1.48572e+06	1.73073e+06	811928	1.64924e+06	830202	886034	758965	1.85633e+06	541977	1.20021e+06
255.705	7.18731	C21H36N7O16P3S	1	CoA	8	Central	KEGG_Metacyc_HMDB	0.263129	0		nFla'nFlaB'PQC'UI'UIB	CoA	0	bp				0.11	0.17	3131858	neg127	0		3-charge	neg	24	1.69421e+06	1.81399e+06	2.21472e+06	1.98238e+06	1.80587e+06	2.63887e+06	1.83423e+06	2.38479e+06	2.85168e+06	2.18721e+06	2406481	2.70842e+06	2302425	2.13278e+06	2.04918e+06	2577675	2.20148e+06	3.13186e+06	2.80352e+06	2.85288e+06	2.58767e+06	2506411	2.94288e+06
659.909	16.2056										nFla'nFlaB'PQC'UI'UIB		0	bp				0.34	0.41	3131046	pos496	0			pos	24	1.85171e+06	1.37065e+06	1.20575e+06	1.04455e+06	1.26274e+06	1.19079e+06	391865	1.4174e+06	1.15004e+06	1.49094e+06	709253	1.89829e+06	1.73939e+06	1.92588e+06	2.21814e+06	1.0157e+06	2.12284e+06	2.38811e+06	3.13105e+06	1.1102e+06	1.40622e+06	1.64156e+06	1.27889e+06
548.858	11.0943				0.2						nFla'nFlaB'UI'UIB		0	bp				0.57	0.57	3121854	pos497	0			pos	23	2.21859e+06	1.546e+06	1.62069e+06	1.87861e+06	1.86435e+06	1.51715e+06	3.12185e+06	2380207	2686146	1.67362e+06	0	2.12531e+06	2.08169e+06	1.77011e+06	2.31334e+06	2.37489e+06	1.93639e+06	1.47979e+06	2.12666e+06	1.06007e+06	1654582	1409819	1.04607e+06
195.935	18.5295										nFla'nFlaB'PQC'UI'UIB		0	bp			xS34x2+	0.16	0.7	3108141	neg140	0			neg	24	3.10814e+06	1.37836e+06	809319	716533	2.62392e+06	2174864	2382501	2.67224e+06	757600	2.90499e+06	2.67859e+06	2.3219e+06	2.06137e+06	2105170	1.75456e+06	729884	2.87828e+06	2.15684e+06	792533	1182916	2.59153e+06	2.74559e+06	358327
251.156	21.2289	C22H42N6O7	3	Asp-Leu-Lys-Lys	7	0	Peptides	-0.834083	24.631		nFla'nFlaB'PQC'UI'UIB	Asp-Leu-Lys-Lys	0	bp		-0.7	xC13xC13x2-mer	0.07	0.28	3086677	pos499	0		2-charge	pos	24	2.02508e+06	1920372	2725948	2.03791e+06	1.9515e+06	1978087	1.89543e+06	1.77675e+06	2.80248e+06	2.14538e+06	2.36373e+06	2.31825e+06	2.54823e+06	2.49931e+06	2787847	1549893	2143027	2.43638e+06	3086677	1.96941e+06	2.43302e+06	1898214	2.76123e+06
593.303	15.9553				0.2			4.2022			nFla'nFlaB'PQC'UI'UIB		0	bp				0.34	0.47	3066315	pos501	0			pos	24	2.05718e+06	2.09547e+06	2.75767e+06	1.46251e+06	1740166	2.03073e+06	508436	1.61695e+06	1.75227e+06	1.43519e+06	830621	1989443	2.00473e+06	2.47036e+06	2318888	779909	2.03011e+06	2.84638e+06	3.06631e+06	2.0609e+06	1.65219e+06	1.78977e+06	1.1566e+06
150.089	6.59038										nFla'nFlaB'PQC'UI'UIB		0	bp				0.3	0.38	3034528	pos504	0			pos	24	1.62598e+06	1.92406e+06	1.44905e+06	2.85856e+06	2.91731e+06	1.70959e+06	2209476	2.16542e+06	1600621	1.52026e+06	1.01068e+06	1.5665e+06	889668	1.50789e+06	821374	1.88984e+06	1.18189e+06	1.88136e+06	3.03453e+06	1.1845e+06	1.10523e+06	1.34327e+06	1.53575e+06
268.153	7.66566	C12H20N4O3	2	His-Leu	7	0	KEGG_Peptides	-0.446196	-20.8411		nFla'nFlaB'PQC'UI'UIB	His-Leu	0	bp				0.4	0.45	3034065	pos505	0		H	pos	24	2.72703e+06	2.67067e+06	2.61963e+06	1467528	3.03407e+06	1.7614e+06	1.4821e+06	2.16572e+06	2.17413e+06	2.30451e+06	2.63515e+06	2.08126e+06	630664	2.39299e+06	2.00501e+06	2.32941e+06	642676	2.28603e+06	1.69926e+06	1.59896e+06	2012791	1.47014e+06	2.38146e+06
182.067	7.09409		0		0.1			0.170399	#N/A		nFla'nFlaB'PQC'UI'UIB	Daminozide	0	bp	xNa+			0.56	0.63	3000680	pos506	0		Na	pos	24	1.30936e+06	1.1553e+06	1.16409e+06	762697	1.19664e+06	1.297e+06	1.07959e+06	1.45979e+06	564823	1367285	128301	1503568	1.79874e+06	995176	1.72705e+06	2.799e+06	2.65796e+06	3000680	1.13906e+06	743627	1198133	2.94068e+06	705175
169.085	7.17948	C7H11N3O2	5	Nalpha-Methylhistidine	7	0	KEGG	-0.613785	-45.1451	-0.662784	nFla'nFlaB'PQC'UI'UIB	Nalpha-Methylhistidine	0	bp				0.12	0.16	2986903	pos508	0		H	pos	24	1.91351e+06	2.14414e+06	2.53347e+06	2.4971e+06	1.91839e+06	1.99779e+06	1.92015e+06	2.37507e+06	2.35787e+06	1.67107e+06	1.82211e+06	2.40633e+06	2287413	1.95372e+06	2.29875e+06	2.78924e+06	2729030	2747284	2.89459e+06	2.24541e+06	2.00963e+06	2.26012e+06	2.9869e+06
203.127	16.2457	C8H17N3O3	1	Lys-Gly	7	0	Peptides	0.254921	-12.9778	0.294364	nFla'nFlaB'PQC'UI'UIB	Lys-Gly	0	bp			xK+	0.22	0.26	2983151	pos509	0		H	posneg	24	1325464	1.36983e+06	1.32815e+06	1.18004e+06	1.5022e+06	1.24297e+06	1.2679e+06	1.52393e+06	1226982	1.37489e+06	864704	1.37716e+06	1.60572e+06	1508409	1.61704e+06	1.94352e+06	1.81775e+06	1.817e+06	2.98315e+06	1.52743e+06	1384802	1.52376e+06	1.60521e+06
875.794	6.12138	C55H102O6	55	TG(52:2)	8	Central	Lipidmaps	-0.284802	34.6553		nFla'nFlaB'PQC'UI'UIB	TG(52:2)	0	bp				0.27	0.27	2979308	pos434	0		NH3	pospos	24	2.02176e+06	1.8886e+06	2.56276e+06	1.95112e+06	2714895	2.42008e+06	2.58887e+06	2.48173e+06	2.45188e+06	2720177	2979308	1.92643e+06	1.78413e+06	2.12378e+06	1.48098e+06	2.42566e+06	2.24087e+06	2.71626e+06	2340934	2.17832e+06	2810674	1.95572e+06	2214809
703.571	12.9625							-5.75402			nFla'nFlaB'PQC'UI'UIB		0	bp				0.19	0.4	2935426	pos511	0			pos	24	1.02715e+06	1.643e+06	1.56178e+06	857473	2.35424e+06	876031	673947	972233	1.16838e+06	1124468	2935426	2.26334e+06	2.02725e+06	2.24864e+06	1.7929e+06	1.10115e+06	1.63174e+06	2.24212e+06	1.5182e+06	1.00534e+06	749632	713454	971698
150.089	5.83818										nFla'nFlaB'PQC'UI'UIB		0	bp			xNH3xNH3	0.22	0.26	2917312	pos458	0			pospos	24	2254313	2.17283e+06	1.4509e+06	2.85856e+06	2.91731e+06	2.38674e+06	1.90312e+06	1.71453e+06	2.60565e+06	2567294	1.17648e+06	1.5665e+06	1.27177e+06	1.22783e+06	820614	2.37336e+06	2122339	2.21809e+06	2.63207e+06	2.20474e+06	1.41343e+06	1976476	1.35817e+06
117.967	13.7232				0.4						nFla'nFlaB'UI'UIB		0	bp				1.03	1.03	2903244	neg142	0			neg	24	1279693	1.20101e+06	2755992	1.47623e+06	978884	964198	2.90324e+06	708292	899206	748564	3683.73	573861	968369	792580	2.81414e+06	817255	1.11642e+06	782236	617756	588092	487986	1.52522e+06	1.29585e+06
308.123	13.6522		0		#N/A			0.0627599	#N/A		nFla'nFlaB'PQC'UI'UIB	S-8-methylthiooctylhydroximoyl-L-cysteine	0	bp				0.11	0.19	2898575	pos498	0		H	pos	24	1.67276e+06	1.30662e+06	1.22462e+06	1437645	1.91163e+06	1.85166e+06	1.61952e+06	2.17695e+06	1.9323e+06	1.88353e+06	1.97645e+06	1941568	1.62566e+06	1970951	1.596e+06	2165482	2.34912e+06	2.89858e+06	2.83516e+06	1.85386e+06	2.58712e+06	1.94572e+06	1.96174e+06
270.067	7.53712										nFla'nFlaB'PQC'UI'UIB		0	bp				0.1	0.16	2893577	pos488	0			pos	24	2.03227e+06	1.87769e+06	2.10308e+06	2.14073e+06	2.58853e+06	1.85155e+06	1829941	1.85497e+06	1884443	2.00045e+06	2.06308e+06	2.29417e+06	1.78048e+06	2104214	2.27929e+06	2.77651e+06	1.98803e+06	2.64758e+06	2.89358e+06	2.36568e+06	1.741e+06	2.08941e+06	2244182
1053.33	17.084										nFla'nFlaB'PQC'UI'UIB		0	bp		C42	xC13	0.22	0.22	2867461	pos503	0			pos	24	1.6915e+06	1.65034e+06	2.20699e+06	2.61389e+06	1.78284e+06	1.87562e+06	2.02166e+06	1.80374e+06	2.56862e+06	1.58115e+06	2.86746e+06	2162980	1.73827e+06	1.73231e+06	2.02431e+06	2.43179e+06	2.15221e+06	2.31296e+06	1.94202e+06	2223887	1.5193e+06	2.10179e+06	1.87302e+06
174.137	20.3906	C8H18N2O2	1	Ne,Ne dimethyllysine	7	0	KEGG_HMDB	-0.0380457	36.2848	-0.023074	nFla'nFlaB'PQC'UI'UIB	Ne,Ne dimethyllysine	0	bp		0.4	xC13	0.11	0.11	2865429	pos513	0		H	pos	24	2.24884e+06	2424141	2865429	2.34071e+06	2.78167e+06	1.88408e+06	1.81862e+06	1.83796e+06	2.25938e+06	2.00568e+06	2.5718e+06	2.0922e+06	2028034	2.0044e+06	2.20151e+06	1.69326e+06	1.92755e+06	1.74934e+06	1.82942e+06	1.60989e+06	1581966	1.64676e+06	1.97691e+06
767.543	4.09539							-4.03226			nFla'nFlaB'PQC'UI'UIB		0	bp		C43	xC13	0.17	0.48	2857407	neg144	0			negneg	24	2003809	2460428	2.83743e+06	1.46019e+06	2.70775e+06	1.57593e+06	1.37405e+06	437392	858912	1.96702e+06	1.5316e+06	2.48537e+06	1.96443e+06	1.99304e+06	2.03367e+06	704597	2.85741e+06	2.50942e+06	2.27306e+06	1.69521e+06	1.5948e+06	1.87496e+06	1.8513e+06
298.251	3.62355	C18H34O3	104	FA oxo(18:0)	8	Central	Lipidmaps_HMDB	1.19309	1.28933		nFlaB'PQC'UI'UIB	FA oxo(18:0)	0	bp				0.28	0.86	2855919	pos512	0		H	pos	23	1.96004e+06	659591	0	750075	2370090	1.4545e+06	1.28752e+06	1.76676e+06	2280471	1.55857e+06	2.85592e+06	1869671	1.81312e+06	2.3249e+06	1374120	718021	686965	753072	1.65279e+06	1.60019e+06	2210838	728906	1.57754e+06
790.556	3.86433							5.55681			nFla'nFlaB'PQC'UI'UIB		0	bp			xS34	0.39	0.44	2855404	neg143	0			neg	24	1.99961e+06	1.96332e+06	2.25577e+06	2.13404e+06	2.66169e+06	1.39379e+06	1.1872e+06	2.22854e+06	1.77276e+06	2.29521e+06	2.37574e+06	1.78403e+06	1.14992e+06	1.36491e+06	889537	752844	2.22331e+06	2.8554e+06	2397205	2182374	2298277	2.32237e+06	2.07911e+06
261.096	13.6953	C9H15N3O6	4	Asp-Gln	7	0	Peptides	0.495787	-46.6083	0.542665	nFla'nFlaB'PQC'UI'UIB	Asp-Gln	0	bp				0.21	0.22	2853071	pos515	0		H	pos	24	1818574	1.84737e+06	1.44498e+06	1.43597e+06	2.12112e+06	2.45213e+06	1.59878e+06	2355721	2.85307e+06	2296936	2208998	1.76699e+06	1369230	2.04839e+06	1.45123e+06	1.27817e+06	1.49178e+06	1.73781e+06	1.00893e+06	1.35015e+06	1565250	2.03214e+06	1.12688e+06
312.267	3.39164	C19H36O3	5	FA oxo(19:0)	8	Central	Lipidmaps	0.683583	-5.04141		nFla'nFlaB'PQC'UI'UIB	FA oxo(19:0)	0	bp				0.22	0.22	2848517	pos516	0		H	pos	24	1.58848e+06	1.93142e+06	1.78393e+06	1.70652e+06	2.0083e+06	1.6222e+06	1.85963e+06	2.20226e+06	2293731	1.92582e+06	2.54163e+06	2.00258e+06	1.91785e+06	1.67228e+06	1.42088e+06	2.60305e+06	2.11536e+06	2.84852e+06	2.46232e+06	1.6967e+06	1.9131e+06	1.86007e+06	1985659
159.894	13.5474				0.4						nFla'UI'UIB		0	bp				1.48	1.48	2835587	pos517	0			pos	23	1.13474e+06	989891	2835587	1.12714e+06	663588	649534	2449689	440081	493922	382337	0	265531	468453	313771	2716099	709964	666292	397933	374235	337052	228740	1.33303e+06	912674
608.631	7.39961				0.1						nFla'nFlaB'PQC'UI'UIB		0	bp	xC13			0.26	0.3	2826204	pos518	0			posneg	24	1.82671e+06	1663536	1.38783e+06	1094817	2.06514e+06	1595664	1.6007e+06	1.74672e+06	1.72708e+06	2.11148e+06	2.8262e+06	2025948	1.51982e+06	1.88644e+06	1.65025e+06	927030	1.92537e+06	1.93665e+06	1.92116e+06	1515573	1.62591e+06	1.43639e+06	1.85018e+06
309.304	3.7588	C20H36O	6	3,7,11,15-Tetramethyl-6,10,14-hexadecatrien-1-ol	7	0	Lipidmaps	1.57406	-6.41707		nFla'nFlaB'PQC'UI'UIB	3,7,11,15-Tetramethyl-6,10,14-hexadecatrien-1-ol	0	bp				0.21	0.61	2811421	pos519	0		NH3	pos	24	2811421	728440	1704158	1.36968e+06	1.5264e+06	1.88592e+06	407392	509706	1.37791e+06	2.02609e+06	2.09202e+06	1.84443e+06	1325501	1.52234e+06	1.29623e+06	1.70539e+06	1.80199e+06	1539309	1.42576e+06	1.6011e+06	1.34771e+06	1.26109e+06	2.44881e+06
747.519	3.64219	C43H74NO7P	7	PE(P-38:6)	8	Central	HMDB	-1.74856	-9.82395		nFla'nFlaB'PQC'UI'UIB	PE(P-38:6)	0	bp				0.18	0.18	2811374	neg146	0		H	neg	24	1.93812e+06	2.30445e+06	2.81137e+06	2238929	2.33676e+06	2.0358e+06	2.23075e+06	1.99736e+06	2.47283e+06	2.01041e+06	1.15805e+06	1.73898e+06	1.80475e+06	1.73046e+06	1934440	2343777	1.84434e+06	2.32884e+06	2070296	2.07102e+06	1.88184e+06	2.27744e+06	2.1529e+06
323.076	10.7702							5.0386			nFla'nFlaB'PQC		0	bp				0.28	1.35	2778542	neg147	0			neg	24	97086.6	192778	259744	387191	280375	211330	303420	306382	442476	313544	309281	385437	410828	552395	273855	410406	219327	276919	2.77854e+06	466008	161528	271807	1.15471e+06
981.537	7.17928										nFla'nFlaB'PQC'UI'UIB		0	bp		C38	xC13xC13	0.16	0.19	2774370	neg148	0			neg	24	1686408	1.96414e+06	1990943	1.64651e+06	2.17648e+06	1.81495e+06	1.67775e+06	1829346	1.79767e+06	1.89919e+06	2.77437e+06	2.04056e+06	1.99364e+06	2.19034e+06	1.92818e+06	1.47711e+06	2355585	1.89727e+06	1.81057e+06	2.03791e+06	1.62787e+06	1.57949e+06	1.56705e+06
202.045	16.8702	C6H12O6	52	D-Glucose	8	Central	KEGG_Metacyc_HMDB	0.293927	19.4239		nFla'nFlaB'PQC'UI'UIB	D-Glucose	0	bp		0.9	xACNxC13	0.2	0.3	2769842	pos520	0		Na	posneg	24	1777736	1.36687e+06	1.74928e+06	1.30981e+06	2.07122e+06	1.77032e+06	2.08204e+06	1.45256e+06	1.72275e+06	1.95837e+06	2.13935e+06	1.86934e+06	1.37084e+06	1499457	2148831	1.89639e+06	2.76984e+06	2164670	1.70473e+06	1.44116e+06	1.9512e+06	2563045	1.2645e+06
680.636	15.6791										nFla'nFlaB'PQC'UI'UIB		0	bp				0.31	0.53	2757315	pos521	0			pos	24	1360477	1.64564e+06	1.55282e+06	1.18938e+06	1.29151e+06	1.58926e+06	744700	1.19781e+06	1.41842e+06	1.20057e+06	1.17597e+06	2.44807e+06	1.6484e+06	1.96244e+06	1.22096e+06	832940	1.06648e+06	2056004	2.75731e+06	1.7189e+06	1.42755e+06	1.25536e+06	1.93282e+06
185.993	17.217	C3H7O7P	2	3-Phospho-D-glycerate	8	Central	KEGG_Metacyc_HMDB	0.102192	-18.7523		nFla'nFlaB'PQC'UI'UIB	3-Phospho-D-glycerate	0	bp			xNa+xNH3x-FA	0.07	0.73	2748661	pos522	0		H	posneg	24	2.37415e+06	1.71633e+06	1018864	352239	2748661	346698	375270	510966	153713	1.10353e+06	999674	1.02709e+06	905836	870910	935563	128360	467338	239891	173327	151259	545872	221749	127375
313.104	16.2336		0		0.1			1.34745	#N/A	0.396091	nFla'nFlaB'UI'UIB	Trp-Ser	0	bp	xK+	-2.1	xC13	0.7	0.7	2739142	pos523	0		Na	pos	23	2227332	2.46026e+06	1.29416e+06	1316989	2662171	2.67686e+06	1.70856e+06	2739142	1.38285e+06	2.21684e+06	0	721908	1960956	1.7156e+06	1.24528e+06	2.31445e+06	1.15956e+06	2542750	1088071	1.7385e+06	1.94656e+06	2.28039e+06	609739
821.583	4.15483										nFla'nFlaB'PQC'UI'UIB		0	bp		C41	xC13	0.19	0.35	2733534	neg149	0			neg	24	1.56428e+06	1.75677e+06	2.03809e+06	1.24359e+06	2.15459e+06	1.52262e+06	1433120	1.69701e+06	1.77602e+06	1736991	2.73353e+06	2.09323e+06	1.99828e+06	2.01398e+06	1.6369e+06	866074	2.29054e+06	2.05052e+06	1.98206e+06	1.60747e+06	1.61686e+06	1.36633e+06	1.36058e+06
167.965	3.26261										nFla'nFlaB'PQC'UI'UIB		0	bp				0.66	0.66	2722435	neg150	0			neg	24	2.07727e+06	1971477	2.6068e+06	2.13785e+06	1.53049e+06	1.53935e+06	2.038e+06	1.32495e+06	1627926	1.28382e+06	17888.9	1.66149e+06	1.59511e+06	1.32557e+06	2.72243e+06	1.64431e+06	1.97076e+06	1.66258e+06	1.33646e+06	1.4874e+06	1257911	2.26979e+06	1.6562e+06
261.158	9.57266										nFla'nFlaB'PQC'UI'UIB		0	bp				0.27	0.27	2719678	pos524	0			pos	24	1.29547e+06	1.34219e+06	1.35437e+06	1.58657e+06	1419617	1533827	1.10981e+06	1.49089e+06	2.08571e+06	1.6833e+06	2.71968e+06	1534933	1.66057e+06	2.05231e+06	1477570	1.85577e+06	1.75324e+06	2237905	2538390	1.69893e+06	1.8866e+06	1.57401e+06	2.19253e+06
197.08	8.55587	C8H11N3O3	3	N-Acetyl-L-histidine	7	0	KEGG_Metacyc	-0.252009	-1.73189	-0.259179	nFla'nFlaB'PQC'UI'UIB	N-Acetyl-L-histidine	0	bp				0.28	0.66	2691920	pos525	0		H	pos	24	848661	1.20296e+06	1.58445e+06	1.43825e+06	1106400	872892	630274	1.0568e+06	2.69192e+06	961496	1.53795e+06	1.43558e+06	692260	1.3887e+06	1.06289e+06	1.46924e+06	509433	1.65759e+06	1.78889e+06	1.47349e+06	882010	650242	2.5346e+06
242.101	12.4877		0		#N/A			-1.15521	#N/A		nFla'nFlaB'PQC'UI'UIB	Ser-His	0	bp				0.41	0.41	2691211	pos502	0		H	pos	24	885043	1.05705e+06	1.04092e+06	876755	1.57109e+06	890348	891612	1.16742e+06	921177	1.14319e+06	2691211	1.46895e+06	1.11922e+06	1305316	1249403	1.39777e+06	1.49074e+06	1683040	1.39968e+06	886750	972484	926909	915477
130.111	27.3554		0		0.2			-0.322344	#N/A	-0.344349	nFla'nFlaB'PQC'UI'UIB	N-Acetylputrescine	0	bp				0.35	0.35	2687803	pos526	0		H	pos	24	2.59771e+06	2513787	2187639	1.81094e+06	1.68523e+06	2.64765e+06	1.98502e+06	2186883	2.37018e+06	1.90955e+06	914989	1.99049e+06	2.09044e+06	2.68442e+06	2670344	1.79858e+06	2.02844e+06	2.57409e+06	2649664	2.47579e+06	2.6878e+06	2430680	1.91092e+06
245.149	15.6353	C9H19N5O3	2	beta-Alanyl-L-arginine	8	Central	KEGG	-0.223515	-14.0472	-0.227047	nFla'nFlaB'PQC'UI'UIB	beta-Alanyl-L-arginine	0	bp				0.18	0.18	2685808	pos527	0		H	pos	24	1.82099e+06	1.7994e+06	1.82669e+06	1.45282e+06	2.27699e+06	1.58936e+06	1.68291e+06	1.79724e+06	1.30877e+06	1.94269e+06	1.21658e+06	1.93876e+06	2.01082e+06	1.7583e+06	1.62631e+06	2.26677e+06	2.31251e+06	2.00393e+06	2.68581e+06	1.3632e+06	1.50703e+06	1.87346e+06	1.56654e+06
371.304	7.04518	C21H41NO4	2	Tetradecanoylcarnitine	7	0	HMDB	0.307429	47.7114	0.330672	nFla'nFlaB'PQC'UIB	Tetradecanoylcarnitine	0	bp				0.28	0.81	2682081	pos528	0		H	pos	24	1.22562e+06	518786	685756	2.19941e+06	653345	1.70506e+06	1.04427e+06	762469	559436	521734	2.46625e+06	2.42485e+06	2.68208e+06	1534150	1.42179e+06	298582	520605	519411	1.62263e+06	1.17005e+06	1730172	1.26251e+06	2.58736e+06
274.164	15.6347	C11H22N4O4	2	Lys-Ala-Gly	7	0	Peptides	-0.183718	-6.49327	-0.184216	nFla'nFlaB'PQC'UI'UIB	Lys-Ala-Gly	0	bp			x-H2OxK+x-NH3	0.11	0.24	2681178	pos500	0		H	pos	24	1.15329e+06	1.73633e+06	1.83729e+06	1.61399e+06	1.88723e+06	959272	1.66892e+06	1.34701e+06	1200731	1.21505e+06	1.48698e+06	2.04028e+06	1.89265e+06	1.76404e+06	1.8078e+06	1.69522e+06	2681178	1.98301e+06	2.57974e+06	1.29723e+06	976518	1.81469e+06	1.73161e+06
595.555	15.6773										nFla'nFlaB'PQC'UI'UIB		0	bp				0.43	0.43	2665897	pos529	0			pos	24	1478203	1.5194e+06	1.49923e+06	1173502	1.28841e+06	1.59375e+06	875055	1487354	1.41058e+06	1.17723e+06	838921	1.78438e+06	642081	1.90997e+06	1.76364e+06	1.02169e+06	1.33738e+06	1.96753e+06	2.6659e+06	1287653	1520090	1.72905e+06	1589961
137.045	12.1427		0		0.1			-0.18786	#N/A		nFla'nFlaB'PQC'UI'UIB	L-Proline	0	bp	xNa+		xNa+	0.35	0.35	2655023	pos531	0		Na	pos	24	1.74239e+06	1.87161e+06	1.95655e+06	2.25225e+06	2136080	1.85261e+06	1.78251e+06	1.91982e+06	2.42527e+06	1.61303e+06	793453	2.36917e+06	2.1816e+06	2135511	1.58823e+06	1.6818e+06	1.84946e+06	2.10567e+06	1.99588e+06	1.91183e+06	1.88638e+06	1.87536e+06	2655023
463.074	18.5923	C14H18N5O11P	1	N6-(1,2-Dicarboxyethyl)-AMP	8	Central	KEGG_Metacyc_HMDB	0.954683	0		nFla'nFlaB'PQC'UI	N6-(1,2-Dicarboxyethyl)-AMP	0	bp		0.7	xC13	0.12	0.82	2649618	pos532	0		H	pos	24	2.64962e+06	2.33584e+06	1.97686e+06	1.41732e+06	2451832	891649	920973	1.2014e+06	754644	1775394	1.3441e+06	1.31558e+06	1.20819e+06	1.13082e+06	986424	106448	222244	214181	152770	45668.9	252448	117236	44446.6
787.666	13.4089										nFla'nFlaB'PQC'UI'UIB		0	bp				0.15	0.24	2648986	pos533	0			pos	24	1.41438e+06	1.57924e+06	1.62956e+06	1.03786e+06	2.08038e+06	1.22628e+06	1.03766e+06	1418210	1.32553e+06	1.34004e+06	2.64899e+06	2.42725e+06	1.93372e+06	2.05322e+06	1.90755e+06	1.38759e+06	1.83298e+06	2.10493e+06	1.51833e+06	1.07928e+06	1.47349e+06	1.04814e+06	1092730
593.553	15.9984										nFla'nFlaB'PQC'UI'UIB		0	bp				0.29	0.38	2644561	pos534	0			pos	24	1.48856e+06	1.48444e+06	1.11434e+06	1.38918e+06	1.75731e+06	1.27931e+06	703096	1.79835e+06	1.49694e+06	1.79392e+06	844862	1.87965e+06	1779286	2.04452e+06	1.92649e+06	941316	1.80038e+06	2.12152e+06	2.64456e+06	1.35927e+06	1.7941e+06	1.0195e+06	1772900
528.106	14.2611										nFla'nFlaB'UI'UIB		0	bp				0.63	0.63	2617704	pos535	0			pos	23	996560	1341581	1.3508e+06	1.59068e+06	1.62006e+06	1.69203e+06	856088	1.32023e+06	2410178	1.77105e+06	0	2617704	1.6826e+06	2.0517e+06	1430755	1.33702e+06	979294	1.46657e+06	1.1248e+06	1.64846e+06	1.59808e+06	1.14373e+06	1.78852e+06
720.589	4.20777				0.1						nFla'nFlaB'PQC'UI'UIB		0	bp	xC13			0.11	0.13	2617445	pos536	0			pos	24	2.2727e+06	2.08227e+06	2.16835e+06	2108183	2.61745e+06	1.71445e+06	1.70455e+06	2.33846e+06	1.8843e+06	1.97744e+06	2.37216e+06	2.18478e+06	1.88127e+06	2.47342e+06	2.05723e+06	1.86889e+06	2.12757e+06	2.40167e+06	1.98161e+06	2.18997e+06	2.36654e+06	1.6902e+06	1958550
353.278	3.7412										nFla'nFlaB'PQC'UI'UIB		0	bp				0.17	0.49	2596147	pos537	0			pos	24	732250	1.50253e+06	2.09561e+06	1.44409e+06	1.67811e+06	1.8417e+06	2.01534e+06	1.55575e+06	1.29963e+06	2.28997e+06	1.84228e+06	2.58019e+06	1923609	1.71004e+06	1.97845e+06	1.62962e+06	697638	1.82661e+06	1.53968e+06	2.59615e+06	487485	1.4455e+06	1.71568e+06
585.533	3.4499	C35H68O5	8	DG(32:0)	8	Central	0	-0.398423	-15.9453		nFla'nFlaB'UI'UIB	DG(32:0)	0	bp				0.6	0.6	2594111	pos538	0		NH3	pos	23	1.65552e+06	1.69104e+06	1.90676e+06	1.93717e+06	2.00406e+06	2210294	2.25507e+06	2.5442e+06	2.34734e+06	2.13366e+06	0	1.07683e+06	1.60267e+06	1.10066e+06	1.4214e+06	1.83465e+06	1.31687e+06	1.80612e+06	2.25398e+06	2.07203e+06	1.76028e+06	1.8252e+06	1.95381e+06
612.152	17.2586	C20H32N6O12S2	1	Glutathione disulfide	8	Central	KEGG_Metacyc_HMDB	-0.0548453	0		nFla'nFlaB'PQC'UI'UIB	Glutathione disulfide	0	bp		3.4	xC13x2+xNa+	0.03	0.21	2590157	neg153	0		H	neg	24	1.98643e+06	1.95038e+06	2.16415e+06	2590157	2.2057e+06	1.86023e+06	1681144	1.58656e+06	2.23254e+06	1.54898e+06	2.27312e+06	2.21008e+06	2.1378e+06	2.14976e+06	2.16919e+06	1.46626e+06	1.45178e+06	1.96756e+06	2200648	1.75314e+06	1.2538e+06	1.92743e+06	2.0014e+06
783.505	3.4141		0		0.1			-0.388768	#N/A	-0.39349	nFla'nFlaB'PQC'UI'UIB	PS(36:4)	0	bp	xNa+			0.19	0.19	2586931	pos539	0		H	pos	24	2586931	2.09637e+06	2470434	2.29803e+06	1901307	2112897	2.17415e+06	2.1561e+06	2136001	2011312	1.32971e+06	1.92965e+06	2.09459e+06	2138413	2.2965e+06	1.92898e+06	1.99726e+06	1862696	2.15498e+06	1.82253e+06	1.87373e+06	2.00717e+06	2070370
167.025	9.08493		0		#N/A			-0.160186	#N/A	-0.196292	nFla'nFlaB'PQC'UI'UIB	Homocysteinesulfinicacid	0	bp				0.53	0.53	2586058	neg154	0		H	neg	24	616891	837575	791372	782651	884318	1.23182e+06	964378	1.1615e+06	1.2963e+06	1.16678e+06	2586058	1.09737e+06	1.06409e+06	1.06895e+06	867363	799057	845766	1.05074e+06	928210	922095	924428	899236	1.1161e+06
684.275	21.1926		0		0.4			-1.74717	#N/A		nFla'nFlaB'UI'UIB	Kynostatin 272	0	bp		-5.4	xC13	1	1	2584827	pos540	0		NH3	pos	23	1.47037e+06	1.16281e+06	2.58483e+06	1252212	716330	935692	2.29145e+06	546836	1.10602e+06	504448	0	700878	646292	537224	2.16594e+06	738596	958249	779040	592949	816623	570310	1.87612e+06	1.1515e+06
241.277	7.16283										nFla'nFlaB'PQC'UI'UIB		0	bp				0.08	0.24	2561609	pos541	0			pos	24	1.88397e+06	1.7472e+06	2.56161e+06	1.64202e+06	1.37148e+06	1.30893e+06	1.44382e+06	1.21239e+06	2.05155e+06	1247039	1.71835e+06	1.94387e+06	1.90612e+06	1823138	2143667	1.68588e+06	1.88377e+06	1.9494e+06	2.15079e+06	1348390	1.97124e+06	1.76804e+06	2075879
273.266	29.3715		0		#N/A			-1.04468	#N/A	-1.10239	nFla'nFlaB'PQC'UI'UIB	Hexadecasphinganine	0	bp		1.2	xC13	0.03	0.15	2557003	pos542	0		H	pos	24	1.91515e+06	2.08634e+06	2.13145e+06	2.35069e+06	1.90317e+06	2.00596e+06	1.92167e+06	2.1491e+06	2176046	1921832	2.18944e+06	2181959	2160176	2.24767e+06	2.09168e+06	2053240	1.94135e+06	1.85603e+06	2.557e+06	2.16965e+06	2013484	1904301	2.35232e+06
624.037	15.0573										nFla'nFlaB'UI'UIB		0	bp			xK+	0.57	0.64	2554285	pos543	0			pos	23	789459	541520	1.17814e+06	486722	538438	1.5968e+06	1.24719e+06	1007401	1.10307e+06	1.12973e+06	0	1.35786e+06	1.06133e+06	1.21048e+06	1.16961e+06	1.18773e+06	1.29011e+06	2554285	445031	1.0707e+06	1445917	1.5034e+06	430973
261.144	16.0357	C9H19N5O4	1	Ser-Arg	7	0	Peptides	0.290912	-27.388	0.323491	nFla'nFlaB'PQC'UI'UIB	Ser-Arg	0	bp			xACN	0.14	0.27	2551648	pos544	0		H	pos	24	1.68955e+06	1.33893e+06	950732	1.09529e+06	1.76011e+06	1.77675e+06	1.35159e+06	1.96227e+06	893781	1.70708e+06	1.08522e+06	1.29834e+06	1.51026e+06	1261969	1.0827e+06	2.55165e+06	1.92401e+06	2431301	1.55827e+06	1.27434e+06	1.71962e+06	1.96323e+06	1.02663e+06
748.524	3.67484		0		0.2			-1.38862	#N/A	-1.47528	nFla'nFlaB'PQC'UI'UIB	PG(34:1)	0	bp				0.28	0.32	2548347	neg156	0		H	neg	24	1.50131e+06	1.71036e+06	1.70157e+06	1932843	2314815	899111	1481094	1.06051e+06	1.96885e+06	1.20028e+06	1295600	1.58729e+06	2.16607e+06	1304177	1.08745e+06	2.03126e+06	2061206	2.54516e+06	2.54835e+06	1.63604e+06	1.81497e+06	1.79279e+06	1.91071e+06
545.347	4.16003		0		0.1			-2.72488	#N/A	1.76166	nFla'nFlaB'PQC'UI'UIB	LysoPC(20:3)	0	bp	xNa+			0.34	0.34	2541097	pos545	0		H	pos	24	1.65918e+06	1.59645e+06	1933525	1.56859e+06	1.4983e+06	1.90477e+06	1.56752e+06	1.77761e+06	1.60114e+06	2.39193e+06	822506	2.27849e+06	2.23704e+06	2541097	2.25702e+06	2399572	1.77945e+06	1.65464e+06	1.96174e+06	1.62341e+06	2.33018e+06	857854	1756208
113.084	7.05825		0		#N/A			0.523464	#N/A	0.543377	nFla'nFlaB'PQC'UI'UIB	epsilon-Caprolactam	0	bp				0.31	0.31	2516867	pos546	0		H	pos	24	2077011	2.12112e+06	1.56455e+06	1.61024e+06	2.2035e+06	2.16752e+06	1.61807e+06	2108940	2.08058e+06	2.17882e+06	2.45091e+06	2319375	979803	2.18304e+06	1678080	2.51687e+06	1.223e+06	1.96678e+06	2.01165e+06	1.91114e+06	2.45251e+06	1753841	2.0575e+06
101.993	27.2287										nFla'nFlaB'PQC'UI'UIB		0	bp				0.06	0.38	2501847	neg159	0			neg	24	1.09331e+06	1.35258e+06	1.51539e+06	1.92819e+06	1.2899e+06	1.11317e+06	1.31715e+06	1.355e+06	1830493	1.16049e+06	1.81834e+06	1.68823e+06	1.65501e+06	1.59647e+06	1.55265e+06	1.57823e+06	1.22494e+06	1.1821e+06	2.44828e+06	1.55215e+06	1.11751e+06	1.09504e+06	2.50185e+06
617.442	15.413										nFla'nFlaB'PQC'UI'UIB		0	bp				0.17	0.34	2497542	pos547	0			pos	24	1161220	1352749	1.72629e+06	1.49888e+06	1.3943e+06	1.50739e+06	1.15993e+06	1372827	2.49754e+06	1.31381e+06	1.1686e+06	1.4931e+06	1064512	1.63234e+06	1.3962e+06	1.06918e+06	1.06833e+06	1.44141e+06	2031607	1.38277e+06	1.12941e+06	1.18102e+06	1506305
179.058	8.26905	C9H9NO3	6	Hippurate	8	Central	KEGG_Metacyc_HMDB	0.230046	10.0706	0.211018	nFla'nFlaB'PQC'UI'UIB	Hippurate	0	bp				0.45	0.45	2496652	pos530	0		H	posneg	24	1.11442e+06	1.09006e+06	1039151	934654	1.28129e+06	1.54023e+06	917248	1.52688e+06	1.74726e+06	1.74045e+06	2496652	1.95575e+06	626965	1.81629e+06	1.19622e+06	1.57021e+06	804596	2012549	1.22082e+06	1.16246e+06	1.44377e+06	1.22415e+06	1.50865e+06
321.265	5.86931		0		0.1			0.735487	#N/A		nFla'nFlaB'PQC'UI'UIB	[FA (16:2)] N-hexadecyl-ethanolamine	0	bp	xNa+			0.64	0.64	2494377	pos550	0		Na	pospos	24	957702	1.78999e+06	1.43217e+06	1.59522e+06	1796554	1.31515e+06	1130077	1.3556e+06	1.43751e+06	1.73504e+06	196258	2.49438e+06	839774	2.02775e+06	1.75217e+06	1.22041e+06	712352	1.10768e+06	1.17848e+06	1.29181e+06	1.75687e+06	1.51638e+06	1.59011e+06
145.983	2.94982										nFla'nFlaB'PQC'UI'UIB		0	bp				0.72	0.72	2484028	neg160	0			neg	24	1.67098e+06	1.6356e+06	2.48403e+06	1.69689e+06	1189789	1.34155e+06	2.42447e+06	1.05553e+06	1.54419e+06	963728	44985.2	1.20844e+06	1.13088e+06	1.00017e+06	2.38819e+06	1.24014e+06	1.6272e+06	1279356	993506	1.30327e+06	975428	1.96083e+06	1.69362e+06
229.179	16.0663	C11H23N3O2	1	N1,N8-diacetylspermidine	7	0	Metacyc	-0.425445	43.5907		nFla'nFlaB'PQC'UI'UIB	N1,N8-diacetylspermidine	0	bp				0.07	0.41	2453893	pos551	0		H	pos	24	1.00793e+06	1.20514e+06	1.75987e+06	2.35301e+06	932788	1.12767e+06	1501794	1.18545e+06	1.83366e+06	1041229	1.49869e+06	1.47723e+06	1.63542e+06	1.68508e+06	1.45891e+06	1.41971e+06	1.48584e+06	904263	1.6193e+06	1.74263e+06	1.44058e+06	854785	2.45389e+06
467.302	4.37842	C22H46NO7P	5	[LysoPC(14:0)] 1-tetradecanoyl-sn-glycero-3-phosphocholine	8	Central	KEGG_Lipidmaps_HMDB	1.01903	8.64291	1.06422	nFla'nFlaB'PQC'UI'UIB	[LysoPC(14:0)] 1-tetradecanoyl-sn-glycero-3-phosphocholine	0	bp				0.04	0.2	2442377	pos460	0		H	pos	24	1.41457e+06	1.50306e+06	1.00546e+06	1.73988e+06	1.58161e+06	1.43827e+06	970206	1.71227e+06	1.46141e+06	1681286	1.4237e+06	1.55702e+06	1.60687e+06	1.54459e+06	1.50846e+06	1.61828e+06	1.21535e+06	1.53355e+06	1.95702e+06	2258771	2.44238e+06	1.45111e+06	2120264
238.131	7.16643										nFla'nFlaB'PQC'UI'UIB		0	bp				0.27	0.27	2437963	pos552	0			posneg	24	1.52677e+06	1337274	1723703	1.51101e+06	1.22686e+06	1582588	1.2172e+06	1.8572e+06	1.25334e+06	1.28316e+06	2437963	1.52999e+06	1.3683e+06	1305406	1.66302e+06	2.22012e+06	1.72349e+06	1.32004e+06	1.53653e+06	1.76307e+06	1.72685e+06	1.85897e+06	1.39151e+06
304.15	4.70524				0.4						nFla'nFlaB'UI'UIB		0	bp				0.86	0.86	2430457	pos553	0			pos	23	1.3064e+06	747487	1.55669e+06	1.44327e+06	783259	1.0061e+06	2.43046e+06	1.39759e+06	1.22652e+06	982072	0	724049	720300	816597	2.0361e+06	398589	992542	722648	641042	1.73976e+06	682461	1.36983e+06	1.18002e+06
165.065	12.0358	C6H7N5O	5	3-Methylguanine	7	0	KEGG_HMDB	0.218211	30.1764		nFla'nFlaB'PQC'UI'UIB	3-Methylguanine	0	bp			xNa+	0.41	0.41	2427418	pos554	0		H	pos	24	1297551	1.7047e+06	1.20504e+06	1.92651e+06	1.70758e+06	1.24236e+06	780676	1.42893e+06	1.36429e+06	1252532	2.42742e+06	1570041	1.32715e+06	1.46444e+06	707692	1.17817e+06	1.05265e+06	1.19345e+06	1.04715e+06	1.13646e+06	879255	667476	1.0392e+06
262.08	16.9866		0		#N/A			-0.00368058	#N/A		nFla'nFlaB'PQC'UI'UIB	L-beta-aspartyl-L-glutamicacid	0	bp				0.34	0.34	2425486	pos556	0		H	posneg	24	872671	961176	1.06266e+06	1.20362e+06	1.15794e+06	845941	851874	1.02493e+06	1.29997e+06	1180189	2.42549e+06	1.50005e+06	1.21367e+06	1.23152e+06	1216657	763724	1.26431e+06	1199300	1.313e+06	1.06754e+06	999732	1002471	1.13739e+06
685.092	13.5074		0		0.1			0.770835	#N/A		nFla'nFlaB'PQC'UI'UIB	NAD+	0	bp	xNa+			0.25	0.48	2418205	pos557	0		Na	posneg	24	1.86272e+06	1298620	1.6387e+06	1.28418e+06	1.46153e+06	1.84894e+06	1.64851e+06	1.87832e+06	237194	1.50963e+06	1.02296e+06	1.98779e+06	1.63247e+06	2.09414e+06	2.01729e+06	1803710	2110853	2.0522e+06	1.95257e+06	2.06716e+06	2.16869e+06	2.41821e+06	1.76626e+06
793.551	3.69002										nFla'nFlaB'PQC'UI'UIB		0	bp				0.14	0.14	2408497	neg155	0			negneg	24	2.02449e+06	1.88495e+06	2186726	2.03552e+06	2.38641e+06	1.90851e+06	1.69252e+06	1.87359e+06	1.98605e+06	2.00302e+06	2.4085e+06	1801782	2028778	1.86476e+06	1.7093e+06	2.35778e+06	1.91815e+06	2331510	2.22851e+06	1.86014e+06	2.02789e+06	1.928e+06	1.9861e+06
111.043	9.79063		0		#N/A			-0.0215013	#N/A		nFla'nFlaB'PQC'UI'UIB	Cytosine	0	bp				0.42	0.44	2396796	pos558	0		H	pos	24	1.63591e+06	2396796	1.91226e+06	1.34775e+06	1.96353e+06	2.36136e+06	609874	1.50554e+06	1.2138e+06	1.87698e+06	1.57574e+06	1.73312e+06	883012	891032	632866	1.13554e+06	1305806	1.73429e+06	1.70166e+06	649970	1.34284e+06	679572	1.43796e+06
258.085	13.9474	C10H14N2O6	3	(1-Ribosylimidazole)-4-acetate	8	Central	KEGG_HMDB	-0.101228	1.66273		nFla'nFlaB'PQC'UI'UIB	(1-Ribosylimidazole)-4-acetate	0	bp		0.2	xC13	0.52	0.52	2379534	neg157	0		H	neg	24	871167	974128	415484	782148	1.32937e+06	1.26635e+06	237422	1.46272e+06	1.31093e+06	1.53667e+06	2.37953e+06	1.63779e+06	1.36728e+06	1.39694e+06	315175	1.25918e+06	1.31791e+06	1.95638e+06	1.88343e+06	1.22828e+06	1.53073e+06	593695	789724
321.18	12.202	C15H23N5O3	1	Phe-Arg	7	0	Peptides	0.75172	11.5786		nFla'nFlaB'PQC'UI'UIB	Phe-Arg	0	bp				0.16	0.23	2378402	pos514	0		H	pos	24	1.24472e+06	1.18883e+06	1147205	1.11336e+06	1.42194e+06	1.18126e+06	1.28855e+06	1.17065e+06	1.0072e+06	1.15941e+06	2.0737e+06	1.6095e+06	1.39321e+06	1.49232e+06	1.73793e+06	1.85238e+06	2.3784e+06	1.77872e+06	1.85166e+06	1.19465e+06	1.1073e+06	1.90474e+06	1.27442e+06
188.141	4.77885	C10H20O3	16	FA hydroxy(10:0)	8	Central	Lipidmaps	-0.646132	-6.15041		nFla'nFlaB'UI'UIB	FA hydroxy(10:0)	0	bp			x-H2O	0.7	0.7	2369733	pos559	0		H	pos	23	1.55774e+06	2.01525e+06	1221451	1.24676e+06	2369733	685182	1.32811e+06	1700182	1.79242e+06	1.7222e+06	425047	377297	294844	700988	0	2.1808e+06	2.00751e+06	959288	2.1588e+06	1.04689e+06	1.15364e+06	1.63017e+06	1.49647e+06
197.142	4.78632	C11H16O2	6	3-tert-Butyl-5-methylcatechol	7	0	KEGG	0.246975	-4.21		nFla'nFlaB'PQC'UI	3-tert-Butyl-5-methylcatechol	0	bp				0.23	0.63	2350287	pos560	0		NH3	pos	23	1.21968e+06	428027	1.02822e+06	764751	1.17503e+06	846349	806389	2350287	906900	654650	1.35775e+06	1.0235e+06	843910	865160	825730	833136	716068	852390	1.303e+06	985223	1.17762e+06	0	732205
483.969	17.9588	C9H15N2O15P3	1	UTP	8	Central	KEGG_Metacyc_HMDB	0.72731	0		PQC	UTP	0	bp				0.08	1.27	2349450	pos561	0		H	posneg	24	2.22966e+06	508282	354005	259990	699805	347032	203431	239036	261068	1.98387e+06	697870	817160	755529	788300	854959	269384	1.45614e+06	482039	296326	343658	2.34945e+06	460336	244534
275.188	28.4109		0		0.2			-0.913012	#N/A	-0.961607	nFla'nFlaB'PQC'UI'UIB	Lycoflexine	0	bp				0.23	0.23	2347062	pos562	0		H	pos	24	2268154	2.33801e+06	2347062	2.24743e+06	2267196	1.68775e+06	1.74451e+06	2.29102e+06	2292705	1.57003e+06	1.577e+06	1.32113e+06	1.69537e+06	1.32131e+06	2.24354e+06	1.56276e+06	1.45672e+06	1.7514e+06	2.00099e+06	2.33375e+06	2344482	2.21903e+06	2.138e+06
629.611	7.33928				0.1						nFla'nFlaB'PQC'UI'UIB		0	bp	xNa+			0.17	0.26	2346603	pos563	0			pos	24	2198933	1.80541e+06	2.0213e+06	1.17271e+06	1.91287e+06	1.39414e+06	1.94862e+06	1.84302e+06	2098451	1.98387e+06	1939978	1.86283e+06	1.46527e+06	2.3466e+06	1.80237e+06	1.21615e+06	1.38204e+06	1.9849e+06	2064626	1.88492e+06	1.71968e+06	1.90388e+06	2.27385e+06
709.786	16.0877										nFla'nFlaB'PQC'UI'UIB		0	bp				0.23	0.58	2343898	pos564	0			pos	24	1.23116e+06	1.79119e+06	2.08768e+06	1.3997e+06	991511	1.21595e+06	640459	1.15332e+06	766758	1.21586e+06	846255	1.53626e+06	1.57368e+06	1.4633e+06	1.69207e+06	557603	1.12309e+06	1.12559e+06	2343898	2.07719e+06	1352685	869379	2.25766e+06
126.043	7.18365	C5H6N2O2	2	Thymine	10	Central	KEGG_Metacyc_HMDB	0.0441226	3.30547	0.106967	nFla'PQC'UI'UIB	Thymine	0	bp				0.12	0.82	2339335	neg165	0		H	neg	24	613452	371130	338643	950335	436195	616538	711720	2339335	654517	446844	537915	515463	439845	412777	526868	179122	193182	200786	204495	926392	159984	354245	348223
241.093	8.09549		0		0.1			-0.463368	#N/A		nFla'nFlaB'PQC'UI'UIB	Pantothenate	0	bp	xNa+			0.48	0.48	2325786	pos565	0		Na	pos	24	1.61522e+06	1.10905e+06	1.56801e+06	1.08942e+06	1650287	1.81139e+06	1438307	1.56218e+06	2.32579e+06	1.80716e+06	609997	1.45302e+06	461745	1.51633e+06	1534280	1.95706e+06	539722	1.76749e+06	1.45144e+06	1.49282e+06	1.88519e+06	1.65242e+06	2.12955e+06
337.069	15.4705							4.99973			nFla'nFlaB'PQC'UI'UIB		0	bp			xK+	0.4	0.4	2319091	pos566	0			pos	24	1.10825e+06	1.34478e+06	1.41959e+06	1.31499e+06	1.34525e+06	1667362	1.62676e+06	1.21117e+06	1.62892e+06	1.36081e+06	2.31909e+06	1203274	1070294	1.12437e+06	1.07649e+06	1053886	1.01759e+06	1.23e+06	1.04126e+06	1.11893e+06	910839	1.19854e+06	1.11371e+06
355.255	3.48567										nFla'nFlaB'PQC'UI'UIB		0	bp				0.2	0.5	2314491	pos567	0			pos	24	1353107	1.29373e+06	873860	807734	1456073	1.05387e+06	731253	505921	871342	1479565	2.31449e+06	2.08374e+06	1.43927e+06	1.89992e+06	1.53324e+06	775859	1.34961e+06	1.52711e+06	1.88239e+06	1490595	614080	567005	1.38766e+06
397.878	1.32758				0.4						nFla'nFlaB'UI'UIB		0	bp				1.01	1.01	2301114	pos568	0			pos	23	1087611	1.3717e+06	2.19002e+06	1.45296e+06	603960	945275	2.30111e+06	575520	1.2284e+06	476593	0	763072	655155	482705	2210824	854464	1.29622e+06	881159	437557	831595	384315	1.84241e+06	1354228
616.691	15.4311										nFla'nFlaB'PQC'UI'UIB		0	bp				0.15	0.25	2299580	pos569	0			pos	24	1.17934e+06	2.00766e+06	2.29958e+06	1.65025e+06	1.86312e+06	1.97019e+06	1.2502e+06	1.19061e+06	2.08214e+06	1.83243e+06	1.3188e+06	1.37667e+06	1.57286e+06	1.39442e+06	1.89367e+06	1.55139e+06	1.58803e+06	1.81296e+06	1.66162e+06	2.02352e+06	1.39518e+06	1384880	1.56029e+06
253.855	15.6875										nFla'nFlaB'UI'UIB		0	bp				0.62	0.62	2296574	neg167	0			neg	23	2.26007e+06	1.62997e+06	991523	877475	2.01508e+06	2.0515e+06	1.16955e+06	1.95852e+06	866585	2.29657e+06	0	1.22114e+06	1.85664e+06	1.75435e+06	1.13292e+06	1129321	1.64517e+06	1.75189e+06	776541	1109762	2.23971e+06	1.52466e+06	496325
113.993	5.3807										nFla'nFlaB'PQC'UI'UIB		0	bp				0.21	0.56	2293369	neg168	0			negneg	24	707128	992245	906617	854431	2.29337e+06	1.03151e+06	1.77575e+06	851697	2093754	1586425	937955	1.33605e+06	857004	1.19443e+06	860489	582550	468177	1.09792e+06	1.47289e+06	1.31228e+06	642052	590342	1.0241e+06
294.183	3.74032	C17H26O4	3	Phytuberin	7	0	KEGG	0.646533	-21.7984	0.778471	nFla'nFlaB'PQC'UI'UIB	Phytuberin	0	bp		1.9	xC13	0.08	0.3	2293119	neg170	0		H	neg	24	1567094	1.5941e+06	1.3323e+06	1.53353e+06	1.20659e+06	1.19375e+06	1.79789e+06	1.99517e+06	2.29312e+06	1.14065e+06	1.20126e+06	1.1786e+06	1.32668e+06	1.13124e+06	1.37669e+06	1489483	1.76706e+06	2.06281e+06	1.67342e+06	1.84977e+06	1.07327e+06	1.19582e+06	1.65167e+06
143.095	12.6241	C7H13NO2	2	4-(Trimethylammonio)but-2-enoate	7	0	KEGG	0.115954	22.196	0.155412	nFla'nFlaB'PQC'UI'UIB	4-(Trimethylammonio)but-2-enoate	0	bp				0.08	0.12	2284915	pos570	0		H	pos	24	1.41221e+06	1.52887e+06	1.74158e+06	1.45162e+06	1.6997e+06	1.73089e+06	1.52461e+06	1.51456e+06	1.79667e+06	1.49555e+06	2.12719e+06	2.08377e+06	1.72047e+06	1.92468e+06	1.88281e+06	1.72789e+06	2.07293e+06	2.28491e+06	1.84938e+06	1.49252e+06	1.78493e+06	1.66056e+06	1.79348e+06
327.998	3.80617										nFla'nFlaB'PQC'UI'UIB		0	bp				0.18	0.18	2283555	pos571	0			posnegneg	24	1.80591e+06	1.90246e+06	1.59956e+06	2.28356e+06	1.85473e+06	1.55655e+06	1.93856e+06	1.90563e+06	1.70177e+06	1769454	1.88775e+06	1.71844e+06	1.31213e+06	1.92104e+06	1.36003e+06	1.82808e+06	2.14345e+06	1.67913e+06	1.64216e+06	1.49582e+06	2.00686e+06	1.5099e+06	1.71105e+06
743.547	3.91687		0		0.2			0.13857	#N/A		nFla'nFlaB'PQC'UI'UIB	PE(36:2)	0	bp				0.15	0.17	2272407	neg171	0		H	neg	24	1.61131e+06	2.033e+06	2.27241e+06	1.51437e+06	2.09337e+06	1.18072e+06	1.20015e+06	1.09339e+06	1481564	1.07244e+06	1.39976e+06	2.02114e+06	1.68639e+06	1.52334e+06	1.5303e+06	1.75733e+06	1339707	1.40547e+06	1237134	1.36858e+06	1.48786e+06	1.26763e+06	1654037
195.119	4.85873				0.2						nFla'nFlaB'UI'UIB		0	bp	xC13				0.34	2270427	pos572	0			pos	19	1.50886e+06	1.31197e+06	1.28751e+06	940856	998660	1.2873e+06	1.08859e+06	1.97817e+06	2.00009e+06	1.15452e+06	0	0	0	0	0	1333037	1.14403e+06	1.32123e+06	2270427	913631	1.1729e+06	1.31328e+06	1.21819e+06
143.975	2.24388							4.04672			nFla'nFlaB'PQC'UI'UIB		0	bp				0.2	0.47	2267023	pos573	0			pos	24	868146	763301	960953	1.18799e+06	1.13999e+06	1.00343e+06	1.60819e+06	1.137e+06	1.68425e+06	1155007	1.19919e+06	1.32946e+06	1.30805e+06	938275	846372	1.49716e+06	1.32596e+06	982233	764780	810641	889516	2.26702e+06	1.01256e+06
215.056	15.1082	C5H14NO6P	1	sn-glycero-3-Phosphoethanolamine	8	Central	KEGG_Metacyc_HMDB	-0.0502847	25.5245	-0.0462231	nFla'nFlaB'PQC'UI'UIB	sn-glycero-3-Phosphoethanolamine	0	bp		0.6	xClxC13	0.05	0.19	2244514	neg172	0		H	neg	24	1.50807e+06	1.60662e+06	1.84747e+06	1.20905e+06	1.92451e+06	2138449	1.93129e+06	1876892	1.72914e+06	2.07097e+06	1.91198e+06	1767740	1.97697e+06	1.81742e+06	1.74153e+06	1.94108e+06	1991408	2244514	1.3814e+06	1.29411e+06	1.72878e+06	1.82017e+06	1.50101e+06
304.958	14.9986										nFla'nFlaB'UI'UIB		0	bp			x-H2O	0.59	0.66	2230588	neg173	0			neg	23	2.23059e+06	1.73246e+06	1.20591e+06	536295	1.98087e+06	1.97329e+06	1.82923e+06	1.5978e+06	573668	1.86647e+06	0	811001	1.21417e+06	1.07611e+06	1.01401e+06	1.27899e+06	1.73964e+06	1.64673e+06	55968.8	581862	1.44562e+06	1.68034e+06	82886.4
341.946	15.2848										nFla'nFlaB'UI'UIB		0	bp			xK+	0.56	0.56	2216934	pos577	0			pos	23	514525	516193	685975	705097	500448	1.00272e+06	711059	774476	1.30516e+06	949784	0	1.10044e+06	1.10828e+06	1.0658e+06	1.18326e+06	596317	1.01304e+06	1.20487e+06	2216934	1.20439e+06	1.20087e+06	1.08234e+06	2.03898e+06
326.001	3.80983										nFla'nFlaB'PQC'UI'UIB		0	bp				0.15	0.16	2215712	pos578	0			pos	24	1932474	1.74288e+06	1.64736e+06	2215712	1.87811e+06	1.76435e+06	1.81582e+06	2.06633e+06	2.13594e+06	1.70712e+06	2171324	1.58918e+06	1.49627e+06	1700928	1.68759e+06	1.68462e+06	2162836	1.82231e+06	1.95739e+06	2202235	1.60358e+06	1506626	1.60107e+06
144.115	4.17187	C8H16O2	26	FA (8:0) octanoic acid	8	Central	KEGG_Metacyc_Lipidmaps_HMDB	-0.0908823	-25.1944	-0.102921	nFla'nFlaB'PQC'UI'UIB	FA (8:0) octanoic acid	0	bp		0.6	xC13	0.06	0.15	2206945	neg175	0		H	negneg	24	2.20694e+06	1.83745e+06	1.71433e+06	1.6882e+06	1.73662e+06	2.03824e+06	1.74851e+06	2086974	2.01182e+06	1.50433e+06	1.7124e+06	1.48472e+06	1.4973e+06	1.58834e+06	1.58732e+06	1.5416e+06	2.17332e+06	1.71389e+06	1.7493e+06	2047731	1.73348e+06	1.94025e+06	1.62657e+06
111.993	14.4223	CH5O4P	2	Hydroxymethylphosphonate	8	Central	KEGG_Metacyc	-0.172409	-4.64288	-2.59562	nFla'nFlaB'PQC'UI'UIB	Hydroxymethylphosphonate	0	bp			xCl	0.41	0.41	2199731	neg141	0		H	neg	24	719942	931477	535190	789385	1.06118e+06	1.12605e+06	373612	1.39147e+06	1.16406e+06	1.03071e+06	2.19973e+06	1.49399e+06	1.27322e+06	1.41139e+06	592538	1.43139e+06	1.40406e+06	1.74914e+06	1.75391e+06	1.48999e+06	1.20465e+06	760921	796642
199.02	12.1375										nFla'nFlaB'PQC'UI'UIB		0	bp				0.77	0.77	2194746	pos580	0			pos	24	1.84917e+06	1.53325e+06	2.19475e+06	1.56778e+06	443801	1.17788e+06	2.02991e+06	524685	1.44437e+06	468524	118800	742512	764437	693192	1.8925e+06	442904	948369	808900	640568	1.41572e+06	905127	1793495	1.59685e+06
764.57	4.24201	C45H81O7P	2	PA(P-42:4)	8	Central	Lipidmaps	-2.73958	5.70511	2.68368	nFla'nFlaB'PQC'UI'UIB	PA(P-42:4)	0	bp				0.22	0.32	2191973	neg166	0		H	negnegneg	24	1.57255e+06	1.82342e+06	2.05455e+06	974608	1.01936e+06	1.51118e+06	1353269	1.60267e+06	1.77959e+06	1.82892e+06	2.03949e+06	1.34579e+06	1751675	1265372	1.33472e+06	1.37683e+06	1.89843e+06	2.19197e+06	1.90947e+06	1.55461e+06	1.81855e+06	1.44654e+06	748772
150.089	7.14368										nFla'nFlaB'PQC'UI'UIB		0	bp				0.17	0.24	2186796	pos581	0			pos	24	1.845e+06	1.5003e+06	1.45709e+06	2.07963e+06	1.53213e+06	2.06046e+06	1.16967e+06	1.33927e+06	1.35369e+06	1.35605e+06	1.60313e+06	1.91549e+06	1.57062e+06	1173444	1.6114e+06	1.88984e+06	1.24562e+06	1.88136e+06	1.5513e+06	2.1868e+06	1.99117e+06	1.70373e+06	1.57631e+06
211.157	4.5571		0		#N/A			-0.205823	#N/A	-0.208421	nFla'nFlaB'PQC'UI'UIB	Elaeokanine C	0	bp				0.34	0.68	2172978	pos582	0		H	pos	24	1045727	460970	985449	812909	1.42713e+06	918160	969603	1.36094e+06	774185	973898	1.72738e+06	1307384	806000	1.02339e+06	833966	851522	420666	972942	2.17298e+06	905054	937393	281795	1.06796e+06
724.524	3.81729				0.2						nFla'nFlaB'PQC'UI'UIB		0	bp	xC13			0.19	0.19	2163393	neg176	0			neg	24	1.52724e+06	1.72383e+06	1.88908e+06	1.95227e+06	1.9042e+06	1.59193e+06	1.50389e+06	1.44322e+06	1.67243e+06	1.40431e+06	1.1083e+06	1.89003e+06	1.70811e+06	1.58304e+06	1.53557e+06	2.16339e+06	1.38458e+06	1.68364e+06	1.66174e+06	1.73373e+06	1.31397e+06	1.96258e+06	1.75517e+06
141.985	4.55648	C2H7O3PS	1	dimethylthiophosphate	7	0	Metacyc	0.675947	-39.5852	-0.77376	nFla'nFlaB'UI'UIB	dimethylthiophosphate	0	bp				0.59	0.59	2158118	neg177	0		H	negneg	23	1.33692e+06	1.40769e+06	1483509	1.30333e+06	1.19414e+06	1322999	1.58475e+06	1109828	1.27958e+06	1.12871e+06	0	1.55599e+06	1.63751e+06	1619119	2158118	1.25226e+06	1.59958e+06	1.19265e+06	1.10706e+06	1.30654e+06	1.15655e+06	1.47419e+06	1.34126e+06
256.117	11.3417		0		#N/A			-0.646833	#N/A		nFla'nFlaB'PQC'UI'UIB	2-(3-Carboxy-3-aminopropyl)-L-histidine	0	bp				0.23	0.27	2154980	pos583	0		H	pos	24	1.30016e+06	1.53137e+06	1.14269e+06	1.31924e+06	2.15498e+06	1.20596e+06	981127	1604030	1.29867e+06	1.51695e+06	1263631	1.78424e+06	1.33662e+06	1.59539e+06	947517	1.694e+06	1.68631e+06	1.79572e+06	1.40538e+06	1.13938e+06	1272115	1.41348e+06	1.15498e+06
197.116	11.3895	C9H15N3O2	1	Hercynine	8	Central	KEGG_Metacyc	-0.0200633	15.0536	-0.00530181	nFla'nFlaB'PQC'UI'UIB	Hercynine	0	bp				0.29	0.49	2153143	pos584	0		H	pos	24	640655	614056	272932	1228366	998106	867128	1.17436e+06	2153143	1.33521e+06	1.09874e+06	1.54696e+06	1.14759e+06	1.09054e+06	1.20257e+06	644670	1.53442e+06	593170	736967	1.32937e+06	1.84417e+06	597948	1.59292e+06	953563
191.899	15.6539										nFla'nFlaB'UI'UIB		0	bp				0.62	0.62	2151637	neg178	0			neg	23	1.97799e+06	1.49645e+06	890930	866703	1.85222e+06	1.97203e+06	1.05945e+06	1.80137e+06	835318	2.15164e+06	0	1.23094e+06	1.78922e+06	1.70288e+06	1.08654e+06	1.14345e+06	1.6381e+06	1.57514e+06	776672	1064674	2.11699e+06	1.40658e+06	487851
275.071	15.4612										nFla'nFlaB'UI'UIB		0	bp			xK+	0.57	0.57	2135616	pos585	0			pos	23	1.29215e+06	1.24895e+06	1082244	1.1336e+06	1.55884e+06	1.62041e+06	1.71049e+06	1.61341e+06	1.4299e+06	1804118	0	1.65403e+06	1.47315e+06	1464262	1.23337e+06	2.13562e+06	2.07298e+06	1.80549e+06	1.55336e+06	1.45643e+06	1.65603e+06	2.11711e+06	1.64082e+06
129.079	6.11843	C6H11NO2	8	N4-Acetylaminobutanal	8	Central	KEGG_Metacyc_HMDB	-0.504348	-2.32754	-0.554211	nFla'nFlaB'PQC'UI'UIB	N4-Acetylaminobutanal	0	bp				0.09	0.49	2130968	pos587	0		H	pospospos	24	921975	955018	1.10401e+06	2.13097e+06	876178	719257	681281	904811	1.26283e+06	1.2518e+06	845202	930044	979843	884214	1.06887e+06	739416	850903	406346	1.40085e+06	1.19533e+06	892016	717292	812328
231.133	16.5239	C8H17N5O3	1	Gly-Arg	7	0	Peptides	-0.110967	-19.4249		nFla'nFlaB'PQC'UI'UIB	Gly-Arg	0	bp				0.15	0.18	2128807	pos588	0		H	pos	24	1939546	2.12881e+06	1.51198e+06	1.37098e+06	1.74681e+06	1927597	1.49808e+06	1696878	1.17214e+06	1.44966e+06	906132	1.1005e+06	1292925	1.22832e+06	1.34171e+06	1.62406e+06	1.25601e+06	1.66846e+06	1.31731e+06	1.36306e+06	1.63665e+06	1.76978e+06	1.37718e+06
246.05	12.7864	C6H15O8P	3	Glycerophosphoglycerol	7	0	KEGG_Metacyc	-0.217045	24.0939	-1.10154	nFla'nFlaB'PQC'UI'UIB	Glycerophosphoglycerol	0	bp		0.6	xNa+xC13	0.28	0.28	2120423	neg174	0		H	negneg	24	1.17116e+06	1.51364e+06	1.3592e+06	1.36813e+06	1.70929e+06	1.46384e+06	1.00003e+06	1.41297e+06	1.63071e+06	1.55937e+06	2.12042e+06	1.56745e+06	1.48733e+06	1.47301e+06	915034	1.41337e+06	1.38217e+06	1708776	1.71436e+06	1.24606e+06	1.18726e+06	1.10256e+06	1.38686e+06
201.173	7.32953	C11H23NO2	1	Caproylcholine	7	0	HMDB	-0.220751	3.62219	-0.224871	nFla'nFlaB'PQC'UI'UIB	Caproylcholine	0	bp				0.08	0.22	2082793	pos590	0		H	pos	24	1745181	1.52311e+06	1.44647e+06	1.80509e+06	1.39175e+06	1.06184e+06	1.92178e+06	1.50279e+06	1.71481e+06	1.30962e+06	1670508	2082793	1.84921e+06	1.86151e+06	1923819	1.514e+06	1.92159e+06	1.84759e+06	1.75689e+06	1.48394e+06	1.45132e+06	1.32359e+06	1.56412e+06
135.055	7.18055		0		#N/A			0.259676	#N/A		nFla'nFlaB'PQC'UI'UIB	Adenine	0	bp				0.12	0.25	2077977	neg182	0		H	neg	24	1.82505e+06	1.84138e+06	2.05511e+06	1.99738e+06	1.61051e+06	1.52335e+06	1.29205e+06	1474606	1.52756e+06	1.14437e+06	1.24982e+06	1.45908e+06	1.28102e+06	1.33562e+06	1.67851e+06	1.16298e+06	1.42184e+06	2077977	1.67718e+06	1.23467e+06	1.23217e+06	1.14739e+06	1531443
745.562	4.10604	C41H80NO8P	45	PE(36:1)	8	Central	0	-0.60473	2.58252		nFla'nFlaB'PQC'UI'UIB	PE(36:1)	0	bp		0.8	xC13x-H2O	0.21	0.26	2062850	neg183	0		H	neg	24	1.46658e+06	1.84819e+06	1972818	1.02009e+06	2.06285e+06	1.30584e+06	1.23722e+06	1.44622e+06	1730282	1.54905e+06	1.132e+06	1.5449e+06	1.50356e+06	897802	1.4032e+06	1.45489e+06	1897381	2.03492e+06	1.73054e+06	1454537	912755	877829	1.4322e+06
233.137	16.0759	C9H19N3O4	1	Lys-Ser	7	0	Peptides	-0.764539	-18.6454	-0.810892	nFla'nFlaB'PQC'UI'UIB	Lys-Ser	0	bp				0.15	0.23	2058067	pos591	0		H	pos	24	1.23823e+06	1.23036e+06	1.02396e+06	916784	1.64096e+06	1.04835e+06	1.11902e+06	1.28272e+06	974396	1.2828e+06	975969	1.15337e+06	1.40476e+06	1429969	1.19687e+06	1588848	1.80693e+06	1.68197e+06	2.05807e+06	997399	1.23105e+06	1.43825e+06	1.07844e+06
430.066	14.9155	C11H20N4O10P2	2	dCDP-ethanolamine	8	Central	0	0.149735	0	-2.27307	nFla'nFlaB'PQC'UI'UIB	dCDP-ethanolamine	0	bp			xK+	0.39	0.39	2055356	pos592	0		H	pos	24	565963	537039	754606	501419	763383	867608	889630	866339	873433	842426	2.05536e+06	981128	964462	1.02029e+06	1.06412e+06	1.16578e+06	1.2737e+06	1.68896e+06	762142	928822	1.21974e+06	1.22322e+06	755273
371.252	4.26536		0		#N/A			-2.88608	#N/A		nFla'nFlaB'PQC'UI'UIB	Lys-Lys-Pro	0	bp				0.1	0.16	2042431	pos593	0		H	pos	24	1.37078e+06	1.51223e+06	1.53932e+06	1.33371e+06	1200039	1.58488e+06	1.71993e+06	1799416	1.53272e+06	1.70433e+06	2.04243e+06	1761891	1.79259e+06	1616543	1.59123e+06	1.23241e+06	1.51064e+06	1.53941e+06	1.18391e+06	1.87785e+06	1.48809e+06	1.34452e+06	1786749
141.985	2.89228		0		#N/A			0.605517	#N/A	-0.868092	nFla'nFlaB'PQC'UI'UIB	dimethylthiophosphate	0	bp				0.55	0.55	2032264	neg185	0		H	neg	24	1.79529e+06	1.84286e+06	1.98996e+06	1.80924e+06	1.64804e+06	1.65539e+06	1981009	1.57217e+06	1.71781e+06	1.57297e+06	56712.5	1.65667e+06	1599948	1570269	2032264	1.68458e+06	1.78824e+06	1.70917e+06	1.48559e+06	1.66059e+06	1547416	1.8836e+06	1.89796e+06
356.021	15.8802				0.1						nFla'nFlaB'PQC'UI'UIB		0	bp	xK+	C11	xK+xC13	0.49	0.49	2031455	pos595	0			posneg	24	1.73873e+06	1.80794e+06	1652083	1.75681e+06	1.86391e+06	1.98945e+06	1.43784e+06	1.96193e+06	2.03146e+06	1.90225e+06	197838	1.76808e+06	1.76179e+06	1.78248e+06	1502361	1.49358e+06	1417227	2.01363e+06	1884989	1478993	1.54748e+06	1.49001e+06	1.57521e+06
211.026	11.2932				0.4						nFla'nFlaB'UI'UIB		0	bp				0.85	0.85	2028652	pos596	0			pos	23	1.38487e+06	1.05539e+06	1.27538e+06	1.06159e+06	509170	1.09961e+06	2.02865e+06	528557	892335	387119	0	644979	574959	500449	1.52489e+06	788604	765870	705799	489926	862191	723858	1.49256e+06	960741
143.975	28.8803							3.57025			nFla'nFlaB'PQC'UI'UIB		0	bp				0.24	0.24	2027899	pos597	0			pos	24	1.10556e+06	1.12347e+06	1.13122e+06	1.63364e+06	1.44583e+06	1.00223e+06	1.57169e+06	1.32897e+06	1.44149e+06	1221526	2.0279e+06	1.58844e+06	1.32254e+06	1.25916e+06	1119706	1.55638e+06	1.51398e+06	1200413	1335955	1.14509e+06	1.10504e+06	1.32711e+06	1.44651e+06
834.661	12.6044		0		#N/A			1.77094	#N/A		nFla'nFlaB'PQC'UI'UIB	SM(d18:1/24:1(15Z))	0	bp				0.28	0.35	2016427	pos598	0		Na	pos	24	889766	1.02157e+06	910960	647958	1.60143e+06	776207	369732	974639	899584	1.0658e+06	1.23565e+06	2.01643e+06	1.70175e+06	1.85378e+06	988149	896762	1.53785e+06	1.32823e+06	1.23143e+06	734886	841443	499496	903114
694.059	15.7384										nFla'nFlaB'PQC'UI'UIB		0	bp				0.32	0.48	2015840	pos599	0			pos	24	1.30067e+06	1.1662e+06	1703654	817175	894726	1.14274e+06	433326	1.07074e+06	1.12142e+06	1.00329e+06	647849	1.22805e+06	1.42323e+06	1.379e+06	1779769	688325	900227	1.74036e+06	2015840	1.03736e+06	897569	837942	1.64494e+06
960.027	7.18856										nFla'nFlaB'PQC'UI'UIB		0	bp				0.29	0.29	2010175	neg186	0			neg	24	965795	1.14128e+06	1.21023e+06	1.08831e+06	1.52694e+06	1.01282e+06	1.03034e+06	1.09614e+06	1.14572e+06	1.11893e+06	2.01017e+06	1.1408e+06	1117232	1.24994e+06	1.10019e+06	1.06588e+06	1.22684e+06	1.35239e+06	1.17941e+06	1.13857e+06	1.14838e+06	970967	1.15122e+06
121.908	5.62231				0.2						nFla'nFlaB'PQC'UI'UIB		0	bp				0.05	0.1	2005471	neg187	0			neg	24	1.68921e+06	1.8732e+06	1.68243e+06	1.67611e+06	1657259	1.6709e+06	1.49317e+06	1686982	1.54633e+06	1.93948e+06	1.24545e+06	1.39537e+06	1.27102e+06	1.36527e+06	1.31469e+06	1.68549e+06	1.60625e+06	1644524	1.98438e+06	1.79742e+06	1.73767e+06	1.61712e+06	1727322
185.975	31.7745		0		#N/A			-1.05591	#N/A		nFla'nFlaB'PQC'UI'UIB	Thiodiacetic acid	0	bp				0.07	0.31	1992742	neg181	0		Cl	neg	24	1.01331e+06	1.26439e+06	1.4277e+06	1823392	1.18181e+06	1.05055e+06	1.35511e+06	1.35489e+06	1.70602e+06	1.09613e+06	1.76752e+06	1.58201e+06	1.61137e+06	1.57043e+06	1.47876e+06	1.5616e+06	1.19933e+06	1.16643e+06	1992742	1.60636e+06	958434	1.00151e+06	1.967e+06
190.048	11.0372		0		0.4			0.0711529	#N/A	0.114706	nFla'nFlaB'UI'UIB	3-Dehydroquinate	0	bp				1.36	1.36	1987666	neg188	0		H	neg	24	175215	247431	215941	247270	228556	271870	80752.3	186796	211407	218493	1987666	236965	226141	241439	198055	219100	276160	337399	507688	155538	257408	139701	286462
747.518	4.06407	C43H74NO7P	7	PE(P-38:6)	8	Central	HMDB	-2.79843	1.57639		nFla'nFlaB'PQC'UI'UIB	PE(P-38:6)	0	bp				0.19	0.38	1986805	neg189	0		H	neg	24	1.06879e+06	1.58727e+06	1.9868e+06	1.2289e+06	680804	1072114	950254	1.20162e+06	1.48127e+06	1.35928e+06	1.0913e+06	1.84696e+06	1.41081e+06	1.37252e+06	1.433e+06	1.30758e+06	1.90348e+06	1.52604e+06	1.39424e+06	1128723	1.09191e+06	1.15211e+06	1.32159e+06
709.071	27.3333										nFla'nFlaB'PQC'UI'UIB		0	bp				0.73	0.73	1985924	pos600	0			pos	24	666838	641221	653573	749626	1.16786e+06	788634	1.31207e+06	918052	521768	787853	1.98592e+06	651485	867863	497585	407223	1.33633e+06	1.0506e+06	749864	314672	514424	588882	1236559	516299
337.175	14.9168	C15H23N5O4	1	L-Tyrosyl-L-arginine	7	0	KEGG_Metacyc_Peptides_HMDB	0.398881	15.0636		nFla'nFlaB'PQC'UI'UIB	L-Tyrosyl-L-arginine	0	bp				0.1	0.49	1983451	pos601	0		H	pos	24	1385520	1.09943e+06	973356	611565	1.36475e+06	1.10462e+06	1.11929e+06	1.54757e+06	566398	1.36526e+06	958009	1.21633e+06	1.20123e+06	1.2187e+06	1.20052e+06	1.56215e+06	1.98345e+06	1.8859e+06	609030	686020	1.18291e+06	1.4578e+06	296911
200.047	15.2126		0		0.4			0.931445	#N/A		nFla'nFlaB'UI'UIB	L-Homocysteic acid	0	bp				1.06	1.06	1975075	pos602	0		NH3	pos	24	99323.2	183783	395474	366251	111580	242153	304222	233667	504213	163854	1.97507e+06	404357	256877	382921	397256	280549	293565	308489	499707	321724	243321	243284	442158
365.132	13.9116	C14H23NO10	2	2-(acetylamino)-1-5-anhydro-2-deoxy-3-O-b-D-galactopyranosyl-D-arabino-Hex-1-enitol	7	0	HMDB	0.298567	15.0676		nFla'nFlaB'PQC'UI'UIB	2-(acetylamino)-1-5-anhydro-2-deoxy-3-O-b-D-galactopyranosyl-D-arabino-Hex-1-enitol	0	bp				0.31	0.34	1968635	pos574	0		H	pos	24	873228	949410	640610	883292	1.07212e+06	872896	616682	974338	1.16541e+06	1.56492e+06	1.96863e+06	1.20796e+06	1.18303e+06	1.21704e+06	872983	1.11832e+06	1.12028e+06	1.02518e+06	1.4993e+06	1.29083e+06	1.32946e+06	920814	1.06705e+06
143.975	30.7781							3.59247			nFla'nFlaB'PQC'UI'UIB		0	bp				0.37	0.37	1966820	pos589	0			pos	24	612262	774816	1308122	1.16307e+06	1.02384e+06	709993	1.15324e+06	933748	885689	1.15638e+06	1.96682e+06	1.09187e+06	1006108	1.01458e+06	855938	1.20816e+06	1.04256e+06	839616	790649	773147	708656	903139	1.22454e+06
156.163	13.6397	C9H17N	1	Pinidine	7	0	KEGG	0.169778	46.8192		nFla'nFlaB'PQC'UI'UIB	Pinidine	0	bp				0.11	0.12	1956776	pos603	0		NH3	pos	24	1.66166e+06	1.35497e+06	1.57655e+06	1.45656e+06	1.5466e+06	1.58713e+06	1.64625e+06	1.76481e+06	1.4658e+06	1.69953e+06	1384656	1790968	1.39195e+06	1.62168e+06	1.55437e+06	1.95678e+06	1.72416e+06	1.6095e+06	1.86312e+06	1.47157e+06	1.74459e+06	1.80661e+06	1375697
537.512	3.65843	C34H67NO3	6	[SP (16:0)] N-(hexadecanoyl)-sphing-4-enine	7	0	KEGG_Lipidmaps_HMDB	0.339497	-9.3364	0.358101	nFla'nFlaB'PQC'UI'UIB	[SP (16:0)] N-(hexadecanoyl)-sphing-4-enine	0	bp		0.4	xC13	0.08	0.17	1929099	neg192	0		H	negneg	24	1.30385e+06	1579326	1.46404e+06	1.9291e+06	1.67916e+06	1.46507e+06	1.40977e+06	1.3631e+06	1.66764e+06	1.20774e+06	1.32154e+06	1.38643e+06	1.25342e+06	1.23718e+06	1.12767e+06	1.89695e+06	1.33891e+06	1.47783e+06	1.41633e+06	1.40587e+06	999488	1.48728e+06	1.37034e+06
372.307	4.30628				0.1						nFla'nFlaB'PQC'UI'UIB		0	bp	xC13			0.07	0.17	1927522	pos604	0			pos	24	1.22076e+06	1.59422e+06	1.29796e+06	1.35883e+06	975214	1927522	1.38662e+06	1.5075e+06	1.31495e+06	1.33618e+06	1.51834e+06	1.35333e+06	1.45308e+06	1399050	1.24349e+06	1.51808e+06	1.2527e+06	1.29372e+06	1.60404e+06	1.521e+06	1.43756e+06	1613044	1.49437e+06
357.236	4.4072										nFla'nFlaB'PQC'UI'UIB		0	bp				0.07	0.28	1924469	pos605	0			pos	24	1.06975e+06	1.26958e+06	1.14172e+06	1.21208e+06	1.30821e+06	1.92447e+06	939269	1.37848e+06	1.13479e+06	1.30748e+06	1.25609e+06	1.22105e+06	1082525	1201764	1.07265e+06	1.46556e+06	989413	1.34869e+06	1.41259e+06	1.27238e+06	1.33052e+06	1.22108e+06	1373905
283.288	7.2226		0		0.1			0.185531	#N/A	0.171105	nFla'nFlaB'PQC'UI'UIB	Octadecanamide	0	bp	x-H2O		x-H2O	0.1	0.18	1919541	pos606	0		H	pos	24	1.53009e+06	1.3756e+06	1.43957e+06	1.42373e+06	1173868	1.513e+06	1.23599e+06	1.40065e+06	1.26091e+06	1.2799e+06	1.55093e+06	1.37118e+06	1.21288e+06	1.22913e+06	1.30506e+06	1.57824e+06	1.258e+06	1.91954e+06	1.46863e+06	1.30112e+06	1.43814e+06	1.74711e+06	1.37273e+06
185.975	31.073		0		#N/A			-1.02925	#N/A		nFla'nFlaB'PQC'UI'UIB	Thiodiacetic acid	0	bp			x-CO2	0.05	0.35	1919176	neg190	0		Cl	neg	24	913557	1.11986e+06	1.35113e+06	1.70302e+06	1.11173e+06	1.00542e+06	1.26179e+06	1.23961e+06	1.59547e+06	1.01029e+06	1586816	1.38649e+06	1.42173e+06	1.49958e+06	1425997	1.40426e+06	1.08772e+06	1.10957e+06	1.88814e+06	1.49027e+06	821093	932155	1919176
128.131	17.5759										nFla'nFlaB'PQC'UI'UIB		0	bp				0.09	0.24	1910784	pos607	0			pos	24	1.38483e+06	1.39221e+06	1.5824e+06	1.5487e+06	1.34096e+06	1.40474e+06	1.37992e+06	1325474	1.46223e+06	1.31551e+06	1.58223e+06	1.48112e+06	1.37015e+06	1.43431e+06	1.69823e+06	1.58321e+06	1910784	1.70308e+06	1022482	1.6786e+06	1428948	1502870	914031
443.025	17.7743	C10H15N5O11P2	1	GDP	8	Central	KEGG_Metacyc_HMDB	0.432649	0		nFla'nFlaB'PQC'UI'UIB	GDP	0	bp				0.09	0.22	1910536	pos608	0		H	pos	24	1221992	1.70403e+06	1.55971e+06	1.17479e+06	1.57128e+06	1.19115e+06	1.13572e+06	1.51565e+06	1.28119e+06	1.40873e+06	1.91054e+06	1.7315e+06	1.55426e+06	1556491	1.70793e+06	1.13044e+06	1.47222e+06	1.28408e+06	1.06e+06	1.46539e+06	1.56273e+06	969149	989670
292.164	18.6798		0		#N/A			0.758013	#N/A		nFla'nFlaB'PQC'UI'UIB	Glutarylcarnitine	0	bp		1.8	xC13	0.08	0.19	1904207	pos609	0		NH3	pos	24	1.22308e+06	1.78864e+06	1.54449e+06	1.11457e+06	1617700	1461817	1.37308e+06	1620289	1.35033e+06	1.41676e+06	1.24821e+06	1.26831e+06	1.36071e+06	1.40187e+06	1513312	1.39399e+06	1.53926e+06	1.75338e+06	1208676	1.35316e+06	1.28179e+06	1.4524e+06	1.28579e+06
272.16	4.20259				0.4						nFla'nFlaB'UI'UIB		0	bp				0.87	0.87	1901530	pos610	0			pos	23	973787	1600748	1.60515e+06	1.90153e+06	1.30298e+06	983826	1.86363e+06	1.26902e+06	1.60011e+06	531432	0	336129	465968	422946	1.11993e+06	1.22176e+06	1.59587e+06	503716	1.24809e+06	1.17439e+06	812373	1888820	1.44651e+06
952.288	15.5237										nFla'nFlaB'PQC'UI'UIB		0	bp				0.39	0.57	1889884	pos612	0			pos	24	803312	1.03379e+06	1.13264e+06	858576	838437	1.08058e+06	309505	804764	971609	771890	400825	1.06093e+06	973717	1.21357e+06	1.47812e+06	417744	889983	1.12779e+06	1.88988e+06	1.00281e+06	957678	745456	1.38842e+06
217.118	16.5144	C7H12N4O3	1	3,6,8-Trimethylallantoin	7	0	KEGG	0.479433	0		nFla'nFlaB'PQC'UI'UIB	3,6,8-Trimethylallantoin	0	bp				0.09	0.21	1879143	pos614	0		NH3	pos	24	762854	820048	963406	857649	829125	1.16294e+06	959729	1.04765e+06	1.04352e+06	896890	1.13953e+06	1.01398e+06	1.14198e+06	949886	972236	1379283	1.16061e+06	1.63071e+06	1.87914e+06	1.18994e+06	1.27332e+06	1.23615e+06	1.31094e+06
711.213	16.3971		0		#N/A			-0.989018	#N/A		nFla'nFlaB'PQC'UI'UIB	Pelargonidin 3-(2G-xylosylrutinoside)	0	bp				0.25	0.25	1878560	pos615	0		H	pos	24	1.15837e+06	1.15757e+06	1.50336e+06	1.60727e+06	1.27785e+06	1.04728e+06	1.39896e+06	1.14059e+06	1.46244e+06	1.42681e+06	767907	1.59789e+06	1.52951e+06	1.35906e+06	1342775	1.0609e+06	1.40204e+06	1.26399e+06	1.61856e+06	1.27658e+06	1275146	1210542	1.87856e+06
275.188	6.96136	C17H25NO2	2	Lycoflexine	7	0	KEGG	-0.915919	11.7689	-0.964706	nFla'nFlaB'PQC'UI'UIB	Lycoflexine	0	bp				0.4	0.4	1874868	pos579	0		H	pos	24	1.17277e+06	987007	757530	797904	1186091	1.13659e+06	939125	1.27407e+06	1.07442e+06	1.20293e+06	1.87487e+06	1.25511e+06	609534	1.27242e+06	927103	1.27458e+06	485193	992998	1.10698e+06	997421	1.42312e+06	1.01301e+06	1.10125e+06
146.022	16.0414	C5H6O5	7	2-Oxoglutarate	10	Central	KEGG_Metacyc_HMDB	-0.0438916	0.226272	-0.0340857	nFla'nFlaB'PQC'UI'UIB	2-Oxoglutarate	0	bp		-0.2	xC13x-CO2	0.05	0.15	1873758	neg195	0		H	neg	24	1.04335e+06	1.01308e+06	1.35213e+06	1.16e+06	1.23452e+06	1.34948e+06	1228083	1.03591e+06	1.58337e+06	1295400	1.29215e+06	1.43128e+06	1.45301e+06	1.40599e+06	1326995	1535287	1.56829e+06	1.87376e+06	1.57442e+06	1177605	1.32576e+06	1.09114e+06	1.29372e+06
273.267	5.49036	C16H35NO2	1	Hexadecasphinganine	7	0	KEGG_Lipidmaps	-0.824022	21.5452	-0.867068	nFla'nFlaB'PQC'UI'UIB	Hexadecasphinganine	0	bp				0.13	0.22	1871266	pos616	0		H	pospos	24	1871266	1.7569e+06	1.32602e+06	1084489	1.32987e+06	1.54941e+06	1.11423e+06	1.39797e+06	1.14391e+06	1.36069e+06	1.11026e+06	1568425	1.31947e+06	1.44436e+06	1.27592e+06	989577	1.24341e+06	1.13799e+06	1.33237e+06	1.58622e+06	1.336e+06	1.10523e+06	1.18282e+06
340.878	1.52346				0.4						nFla'nFlaB'UI'UIB		0	bp				0.9	0.9	1865153	pos617	0			pos	23	1.19336e+06	1.09225e+06	1.76362e+06	1.21345e+06	650671	852083	1.86515e+06	557413	1.05609e+06	442628	0	715434	648323	478101	1.76875e+06	852779	1.0696e+06	883380	429022	802240	401987	1.54741e+06	1.18628e+06
516.114	13.4194	C17H26N4O11S	2	Asp-Glu-Cys-Glu	7	0	Peptides	-0.194348	-19.2305		nFla'nFlaB'PQC'UI'UIB	Asp-Glu-Cys-Glu	0	bp				0.48	0.5	1865148	pos618	0		Na	pos	24	687249	667307	728330	472295	922087	1.40769e+06	943942	1.01819e+06	838509	1.01745e+06	1.66733e+06	841094	830670	796337	466932	612369	877094	946599	364528	766766	1.86515e+06	993734	512193
215.625	20.8606	C17H33N7O6	5	Ala-Val-Ser-Arg	7	0	Peptides	-0.317953	23.3002		nFla'nFlaB'PQC'UI'UIB	Ala-Val-Ser-Arg	0	bp		-1.5	xC13x2-mer	0.26	0.26	1864002	pos619	0		2-charge	pos	24	1.10142e+06	1.05353e+06	1.51228e+06	1.0844e+06	1.03325e+06	1.10552e+06	937881	1.04624e+06	1.33526e+06	1055272	1.12997e+06	1.864e+06	1.02513e+06	1.16859e+06	1298781	911519	1.05938e+06	1.35513e+06	1.18815e+06	906714	918170	949981	1.06636e+06
234.183	4.31381				0.4						nFla'nFlaB'UI'UIB		0	bp				1.39	1.39	1860836	pos620	0			pos	21	1411651	1.54486e+06	1.36594e+06	1.33855e+06	1.86084e+06	877120	1.07119e+06	1.84894e+06	782408	933932	0	0	0	383178	489636	925786	1.84366e+06	488225	1.49035e+06	1.47072e+06	1.59431e+06	1.4607e+06	1110842
185.975	30.2195		0		#N/A			-1.00325	#N/A		nFla'nFlaB'PQC'UI'UIB	Thiodiacetic acid	0	bp				0.09	0.39	1860816	neg196	0		Cl	negnegneg	24	800316	980531	1212281	1.55577e+06	931377	859400	1.11711e+06	1.06485e+06	1.51792e+06	908605	1.54968e+06	1398220	1.33232e+06	1.37311e+06	1.20662e+06	1.30062e+06	1.02859e+06	888857	1.86082e+06	1.31315e+06	735069	795131	1.84765e+06
300.134	27.4638		0		0.1			0.330883	#N/A		nFla'nFlaB'PQC'UI'UIB	2-Ethylhexyl phthalate	0	bp	xNa+			0.12	0.47	1853422	pos621	0		Na	pos	24	598472	818807	939302	1.28863e+06	745964	694313	812408	890775	1.1353e+06	783934	1.2809e+06	1.18629e+06	1.01465e+06	999676	991085	970563	829946	745046	1.85342e+06	1.06506e+06	637830	664657	1.79812e+06
555.131	17.9349										nFla'nFlaB'PQC'UI'UIB		0	bp		C22	xC13	0.19	0.3	1836578	pos622	0			posneg	24	806691	770967	732037	602249	1.04566e+06	941019	990436	1.16941e+06	914371	1.47388e+06	1.83658e+06	1.35486e+06	1.49524e+06	1.31782e+06	1110953	1048357	886720	1.73546e+06	1.27081e+06	877170	996998	1.01175e+06	813102
566.982	10.345				0.2						nFla'nFlaB'UI'UIB		0	bp				0.64	0.64	1835509	neg201	0			negneg	23	1.25781e+06	1335474	1.83551e+06	1.51763e+06	983189	1.09676e+06	1.64431e+06	989288	1.24309e+06	804298	0	937809	1.07783e+06	957253	1.63342e+06	1.20867e+06	1.31702e+06	1.03075e+06	1.06677e+06	1.26276e+06	776246	1.06937e+06	1.18776e+06
186.119	4.31098										nFla'nFlaB'PQC'UI'UIB		0	bp				0.14	0.55	1826751	pos623	0			pos	24	1.1381e+06	1.18404e+06	1.42375e+06	1257953	1.36653e+06	1.71148e+06	1517141	1.40551e+06	1.42219e+06	1.30875e+06	892533	862310	741968	878910	1.08438e+06	1826751	437379	1.46169e+06	821213	1.78149e+06	651956	923447	1203430
604.011	16.4911										nFla'nFlaB'PQC'UI'UIB		0	bp			xNa+	0.51	0.51	1824206	pos624	0			posneg	24	1.67386e+06	1.5478e+06	1.29041e+06	1.30864e+06	1.82421e+06	1.35744e+06	1.11956e+06	1.4192e+06	1.10835e+06	1.69647e+06	148148	1.40947e+06	1.76798e+06	1.5042e+06	1.24696e+06	1393877	1.56899e+06	1.65978e+06	1.53503e+06	1.01822e+06	1.53768e+06	1.25117e+06	1.14297e+06
251.041	15.3166	C9H11NO6	3	4-(L-Alanin-3-yl)-2-hydroxy-cis,cis-muconate 6-semialdehyde	8	Central	KEGG_Metacyc	1.30977	-10.159		nFla'nFlaB'PQC'UI'UIB	4-(L-Alanin-3-yl)-2-hydroxy-cis,cis-muconate 6-semialdehyde	0	bp				0.52	0.52	1809059	pos625	0		Na	pos	24	1.57371e+06	1.22929e+06	1.11474e+06	1.38448e+06	1.4384e+06	1.43405e+06	1.67221e+06	1.56967e+06	1.28144e+06	1269108	77726.6	1.30866e+06	1.32585e+06	1.25412e+06	1.22902e+06	1.80906e+06	1.44975e+06	1.5402e+06	1.31478e+06	1.30274e+06	1364780	1.71388e+06	1.43011e+06
650.108	17.2435				0.1						nFla'nFlaB'PQC'UI'UIB		0	bp	xK+			0.53	0.53	1799577	pos626	0			pos	24	1084757	1.05074e+06	967244	1.79958e+06	1.08334e+06	1.12759e+06	1.0611e+06	1.07616e+06	1.44689e+06	844155	92514.8	845438	1.25546e+06	1.17918e+06	1.1845e+06	853995	872693	1002008	963716	948653	711978	1280035	889903
203.127	11.1445		0		#N/A			-0.165013	#N/A	-0.163989	nFla'nFlaB'PQC'UI'UIB	Lys-Gly	0	bp				0.1	0.22	1795894	pos627	0		H	pos	24	1.22029e+06	1089775	1.23173e+06	1.41536e+06	1.23506e+06	1.32183e+06	927668	1.40112e+06	1.76612e+06	1.36919e+06	1319073	1.66336e+06	1.70466e+06	1.51071e+06	1.50206e+06	1.5635e+06	1368527	1.79589e+06	1.68801e+06	1.33434e+06	1.31686e+06	1.07449e+06	1504104
135.933	14.7879	ClHO4	1	perchlorate	7	0	Metacyc	-0.203845	37.9292		nFla'nFlaB'UI'UIB	perchlorate	0	bp			x-CO2xCl37	0.58	0.58	1794274	neg203	0		Cl	neg	23	1523081	1676697	1.65677e+06	1.45742e+06	1.45792e+06	1199027	1794274	1.33825e+06	1.34893e+06	1.21347e+06	0	1.23622e+06	1.63829e+06	1.54149e+06	1.65742e+06	1.51296e+06	1412336	1.20011e+06	1.06626e+06	1.31005e+06	805771	1.36646e+06	1.11554e+06
515.046	16.6775	C13H19N5O13P2	2	3-(ADP)-glycerate	7	0	KEGG_Metacyc	1.24416	0		nFla'nFlaB'PQC	3-(ADP)-glycerate	0	bp		4.6	xC13	0.2	0.25	1785498	pos628	0		H	posneg	15	1.7855e+06	1.61797e+06	1.58136e+06	1.41141e+06	1.74691e+06	773699	845446	824497	733125	1276521	1.14655e+06	825912	775171	792173	719568	0	0	0	0	0	0	0	0
390.2	4.8575		0		0.4			2.95753	#N/A		nFla'nFlaB'UI'UIB	Pro-Pro-Arg	0	bp				1.44	1.44	1777727	pos475	0		Na	pos	21	1.41982e+06	1.44403e+06	1.12218e+06	780933	1.22282e+06	1315623	874501	1730101	1.49872e+06	1.60144e+06	1.2603e+06	765697	0	0	0	827202	1.5988e+06	1.58986e+06	1.7035e+06	1.0632e+06	1.77773e+06	954324	1.16659e+06
226.107	10.9904	C9H14N4O3	3	(6R)-6-(L-Erythro-1,2-Dihydroxypropyl)-5,6,7,8-tetrahydro-4a-hydroxypterin	7	0	KEGG_Metacyc_HMDB	0.0342332	19.5915	0.0513696	nFla'nFlaB'PQC'UI'UIB	(6R)-6-(L-Erythro-1,2-Dihydroxypropyl)-5,6,7,8-tetrahydro-4a-hydroxypterin	0	bp				0.15	0.29	1777172	pos629	0		H	pos	24	1.04438e+06	1.03878e+06	1.06216e+06	759469	1.6284e+06	1.25131e+06	810113	1.14914e+06	915943	1.37407e+06	1.38411e+06	1.3299e+06	1166519	1.49737e+06	1.0074e+06	1.46027e+06	1.54572e+06	1.77717e+06	1.25267e+06	762615	1.48856e+06	1.55385e+06	1.07862e+06
185.975	29.076		0		0.2			-0.992581	#N/A		nFla'nFlaB'PQC'UI'UIB	Thiodiacetic acid	0	bp				0.1	0.43	1776275	neg202	0		Cl	neg	24	689806	949366	1.09972e+06	1.5099e+06	889907	763994	968518	948432	1.43124e+06	766904	1.45062e+06	1.31753e+06	1.28567e+06	1.22234e+06	1.12004e+06	1.16305e+06	843031	810062	1.76699e+06	1.29255e+06	695423	670241	1.77627e+06
276.055	16.1589	C11H14N2O3S	2	L-alanyl-L-&alpha;-thiophenylglycine	7	0	Metacyc	0.24055	47.4866		nFla'nFlaB'UI'UIB	L-alanyl-L-&alpha;-thiophenylglycine	0	bp				0.57	0.57	1761546	pos632	0		Na	pos	23	1.62275e+06	1.47011e+06	1.25525e+06	1.16434e+06	1.18379e+06	1.34305e+06	1.47733e+06	1.27737e+06	1.04762e+06	1.29575e+06	0	1.27335e+06	1.13833e+06	1.08839e+06	1.34581e+06	1.72319e+06	1.43153e+06	1761546	1.28072e+06	1.02233e+06	1138111	1.54101e+06	1014357
146.106	12.9739	C6H14N2O2	8	D-Lysine	8	Central	KEGG_Metacyc_HMDB	0.226708	-47.7876	0.279855	nFla'nFlaB'PQC'UI'UIB	D-Lysine	0	bp				0.05	0.1	1760802	pos633	0		H	posneg	24	1.41238e+06	1.40437e+06	1537835	1.20392e+06	1.44439e+06	1.36126e+06	1131763	1.20244e+06	1285287	1.20687e+06	1.59184e+06	1.46018e+06	1.48291e+06	1.62479e+06	1.46689e+06	1.39668e+06	1.58241e+06	1.6876e+06	1760802	1.48044e+06	1.38461e+06	1258113	1.45534e+06
192.136	4.49927										nFla'nFlaB'PQC'UI'UIB		0	bp				0.26	0.26	1751353	pos636	0			pos	24	1.62114e+06	1.54606e+06	1.26094e+06	1.75135e+06	1.68457e+06	1.5878e+06	1.22618e+06	1320162	1.74186e+06	1.32676e+06	1.12414e+06	816582	998823	1.04024e+06	529132	1.41219e+06	1419158	1.2458e+06	1.51699e+06	1599826	1.18153e+06	1.14079e+06	1.33874e+06
313.21	4.48325										nFla'nFlaB'PQC'UI'UIB		0	bp				0.09	0.13	1742603	pos594	0			pos	24	1.14402e+06	1.4098e+06	1.24442e+06	1.31975e+06	1.39083e+06	1.30114e+06	1.18519e+06	1.35709e+06	1204396	1.40406e+06	1.40786e+06	1.21415e+06	1.52041e+06	1.54199e+06	1.46255e+06	1.2213e+06	1.41114e+06	1.60225e+06	1.49866e+06	1.7426e+06	1.39527e+06	1.22334e+06	1.60967e+06
791.549	3.96558				0.1			3.7073			nFla'nFlaB'PQC'UI'UIB		0	bp	xCl37			0.17	0.2	1733997	neg204	0			neg	24	1146972	1.41913e+06	1.50844e+06	1.35957e+06	1.734e+06	938481	1.08462e+06	947526	1.48621e+06	1.19939e+06	1.21415e+06	1.4621e+06	1.07183e+06	1.0124e+06	968796	1.55905e+06	1.59446e+06	1640811	1.35303e+06	1.10195e+06	1.09546e+06	1.27067e+06	1.08461e+06
335.046	15.3804				0.1						nFla'nFlaB'PQC'UI'UIB		0	bp	xK+			0.08	0.1	1732463	pos637	0			pos	24	1.50924e+06	1.42564e+06	1.35448e+06	1.37281e+06	1.73246e+06	983849	1.032e+06	1.17511e+06	1.04462e+06	1140364	1.13316e+06	1.28338e+06	1.38073e+06	1.34217e+06	1.33964e+06	1.50745e+06	1.5067e+06	1.47088e+06	1.48524e+06	1.15268e+06	1.037e+06	922901	1.06656e+06
247.905	5.14372										nFla'nFlaB'UI'UIB		0	bp			xCl37	0.64	0.64	1725728	neg206	0			negneg	23	1.35692e+06	1277365	1.70753e+06	1.45995e+06	1.15452e+06	1.22968e+06	1.72573e+06	1.05707e+06	1.39977e+06	887651	0	1.25814e+06	1.01986e+06	903349	1.68799e+06	1.27114e+06	1.43375e+06	1172933	911886	997332	1.064e+06	1.58418e+06	1.4705e+06
249.035	9.48836										nFla'nFlaB'UI'UIB		0	bp				0.6	0.6	1724492	pos638	0			pos	23	684993	1081789	916075	1.06256e+06	903838	826925	530990	816036	1.08478e+06	894537	0	1.46787e+06	1323016	1.72449e+06	1.0846e+06	970518	1.21976e+06	1.34235e+06	1.37572e+06	987321	879092	838163	1.18049e+06
681.739	15.4512										nFla'nFlaB'PQC'UI'UIB		0	bp				0.26	0.38	1722780	pos639	0			pos	24	728838	1.0062e+06	1.13586e+06	980343	1.08485e+06	1.04701e+06	849228	878212	912544	914094	1.72278e+06	1.114e+06	1.15595e+06	913152	1.09254e+06	812096	1.01126e+06	1.0506e+06	1.05243e+06	847893	767286	887665	849266
704.79	15.4334										nFla'nFlaB'PQC'UI'UIB		0	bp				0.21	0.35	1718561	pos640	0			pos	24	1.01043e+06	1.1847e+06	1.59783e+06	1.30431e+06	1.53765e+06	1.40441e+06	950905	819973	1.71856e+06	1.30656e+06	892437	1.16585e+06	744263	1.30217e+06	1.13758e+06	680028	763970	936708	1.42569e+06	1.05667e+06	1.2782e+06	841451	1.54523e+06
266.129	7.23058							-5.311			nFla'nFlaB'PQC'UI'UIB		0	bp				0.08	0.13	1717811	pos641	0			posneg	24	1.1366e+06	1.386e+06	1.30247e+06	1.01764e+06	1.11736e+06	1.23317e+06	1.42378e+06	1.4263e+06	1.41824e+06	1.1843e+06	1.61594e+06	1.44707e+06	1.38637e+06	1.29813e+06	1.47885e+06	1.71781e+06	1.66744e+06	1.57616e+06	1.6715e+06	1.15741e+06	1.15464e+06	1.21403e+06	1.26621e+06
280.088	7.02703										nFla'nFlaB'PQC'UIB		0	bp		C14	xC13	0.27	0.89	1706959	neg208	0			neg	24	750671	232723	371719	542358	691421	411733	307980	215210	314137	324035	1366102	1706959	1.18655e+06	1.22099e+06	768243	169914	595224	509626	1691497	601685	1.17917e+06	412073	975881
267.095	16.4229	C9H17NO8	2	Neuraminic acid	7	0	KEGG_Metacyc_HMDB	0.204179	-43.8326		nFla'nFlaB'PQC'UI'UIB	Neuraminic acid	0	bp			xK+	0.49	0.49	1705404	pos642	0		H	pos	24	476769	512634	699551	572423	654139	459323	500089	459000	662798	524206	1.7054e+06	913729	686403	643096	652886	501989	784146	663756	1.0265e+06	509982	543307	536528	920357
186.1	11.2896	C8H14N2O3	1	Ala-Pro	7	0	Peptides	0.150598	-8.59003	0.183508	nFla'nFlaB'PQC'UI'UIB	Ala-Pro	0	bp				0.19	0.33	1705102	pos643	0		H	pos	24	1.09443e+06	1.01447e+06	628963	746132	1477355	1.24624e+06	971764	1.53612e+06	1.02376e+06	1705102	1.4884e+06	1167212	1.21555e+06	1.26338e+06	846111	1.42145e+06	1.2353e+06	1.58928e+06	1065836	1.24603e+06	1.39406e+06	1.46661e+06	574312
947.457	15.222										nFla'nFlaB'PQC'UI'UIB		0	bp				0.23	0.38	1698003	pos555	0			pos	24	1.01389e+06	1.15129e+06	1.698e+06	1.46345e+06	1.51511e+06	559833	833355	1530933	1.19048e+06	837414	1.65271e+06	1.21362e+06	995185	997530	1.08887e+06	807010	1.12427e+06	1.21431e+06	1.2233e+06	884905	1162155	823112	1.13745e+06
295.25	27.5891		0		0.2			-2.1884	#N/A	-2.31154	nFla'nFlaB'PQC'UI'UIB	[SP (3:0)] sphinga-4E,8E,10E-trienine	0	bp				0.48	0.48	1689456	pos644	0		H	pos	24	1.44068e+06	1.32719e+06	1.24064e+06	1.23262e+06	1.43964e+06	726366	1.47776e+06	672544	1.16011e+06	779406	1653391	941132	302395	1.04174e+06	1.27423e+06	1.68946e+06	1.54909e+06	1.63368e+06	1194731	1.21333e+06	1504132	1584112	1.19115e+06
234.103	7.16576	C9H18N2O3S	2	Ile-Cys	7	0	Peptides	-1.58432	-33.1397		nFla'nFlaB'PQC'UI'UIB	Ile-Cys	0	bp				0.26	0.32	1688156	neg209	0		H	neg	24	777905	548059	934094	810768	668702	824120	739864	721561	1329117	727425	479802	921978	903260	848736	1.06631e+06	1.2214e+06	967581	1688156	1.34897e+06	999610	628070	1521950	1.09128e+06
249.087	3.66156										nFla'nFlaB'PQC'UI'UIB		0	bp				0.08	0.66	1683554	neg210	0			neg	24	1.66078e+06	907578	1683554	573451	1.6283e+06	400381	1.57415e+06	288199	654016	1.04077e+06	1063860	1.07306e+06	1.03145e+06	1.09206e+06	898453	509294	821325	464949	518929	397166	1.00625e+06	443173	750901
903.824	6.13435	C57H106O6	53	TG(54:2)	8	Central	Lipidmaps	-1.37867	34.7934		nFla'nFlaB'PQC'UI'UIB	TG(54:2)	0	bp				0.22	0.23	1668571	pos611	0		NH3	pos	24	981666	1.16569e+06	1095074	1.19618e+06	1.30361e+06	1.38236e+06	1.02818e+06	1.56812e+06	1.31388e+06	1.29222e+06	1.58709e+06	1.18736e+06	1.01539e+06	1.05315e+06	956865	968163	1169567	1.66857e+06	1.27754e+06	1.30406e+06	1.43024e+06	1.14697e+06	1.63131e+06
406.139	10.8805		0		#N/A			-1.67409	#N/A		nFla'nFlaB'PQC'UI'UIB	Wuweizisu C	0	bp				0.32	0.52	1662974	pos646	0		Na	pos	24	630270	791181	706433	565316	1.55432e+06	688386	407398	864222	858021	1.66297e+06	1.47767e+06	1.3427e+06	1.01463e+06	1.33582e+06	553001	940905	914028	1.58587e+06	1.17145e+06	659070	1.22379e+06	664249	982084
359.267	4.79822	C19H37NO5	1	2-Hydroxylauroylcarnitine	7	0	HMDB	0.148353	10.0322	0.13528	nFla'nFlaB'PQC'UIB	2-Hydroxylauroylcarnitine	0	bp				0.15	2	1662663	pos647	0		H	pos	21	1184388	1300336	1427502	1.47766e+06	1236177	1.52393e+06	1.48236e+06	1.50021e+06	1.28308e+06	1.66266e+06	1.05321e+06	1.5122e+06	1.16709e+06	1.22426e+06	1.1244e+06	0	0	787101	0	322499	784976	880232	396651
251.261	7.28428	C17H30	8	3-Ethyl-7,11-dimethyltrideca-1,3Z,6E,10-tetraene	7	0	Lipidmaps	-0.283766	45.0873		nFla'nFlaB'PQC'UI'UIB	3-Ethyl-7,11-dimethyltrideca-1,3Z,6E,10-tetraene	0	bp				0.17	0.28	1658543	pos648	0		NH3	pos	24	1.18947e+06	888426	947467	1.0981e+06	950773	971657	992453	1.00054e+06	1.18098e+06	1.23869e+06	852318	936452	747565	1.1821e+06	1.02045e+06	1.65854e+06	883014	1.12716e+06	1.09424e+06	1.21686e+06	1.17572e+06	1.22347e+06	1.18656e+06
791.07	16.146										nFla'nFlaB'PQC'UI'UIB		0	bp		C70	xC13	0.33	0.39	1655434	pos649	0			pos	24	1.60519e+06	1.65543e+06	1.07213e+06	1.05706e+06	1.54544e+06	1143167	474889	1.08983e+06	1.09623e+06	516606	561830	1.51896e+06	1.3532e+06	1.37164e+06	1.63689e+06	713385	1.5683e+06	1.62747e+06	1.42163e+06	1.17794e+06	1.39454e+06	1.34159e+06	1.38807e+06
179.095	4.6126		0		#N/A			-0.241811	#N/A	-0.248705	nFla'nFlaB'PQC'UI'UIB	Phenacetin	0	bp				0.46	0.48	1653726	pos650	0		H	pos	24	783507	1078346	847532	837569	1293859	640589	998738	732165	941358	1.19693e+06	1.65373e+06	785940	769647	1.36404e+06	513085	956811	1.02912e+06	1.07699e+06	1.00534e+06	814769	1.12914e+06	428161	423391
141.985	31.0509		0		0.1			0.589318	#N/A	-0.889788	nFla'nFlaB'PQC'UI'UIB	dimethylthiophosphate	0	bp	x-CO2			0.07	0.29	1650431	neg205	0		H	neg	24	851263	1.09429e+06	1.28656e+06	1.51211e+06	1.07659e+06	870273	1.14052e+06	1.16767e+06	1.39456e+06	898466	1.40182e+06	1321640	1.3633e+06	1253914	1.17407e+06	1.30269e+06	1.07027e+06	908086	1.57248e+06	1.25065e+06	817724	879149	1650431
703.571	18.4424							-5.69475			nFla'nFlaB'PQC'UI'UIB		0	bp				0.05	0.39	1636890	pos651	0			pos	24	962498	1.21189e+06	1.63689e+06	605168	1.44698e+06	732872	464356	656250	752768	901990	1.45133e+06	1.35825e+06	1.41874e+06	1.50259e+06	1525513	599328	1.11418e+06	1.60684e+06	956768	578257	551009	433147	712439
177.1	11.7004		0		0.1			0.289383	#N/A	0.338906	nFla'nFlaB'PQC'UI'UIB	validamine	0	bp	x-FA			0.08	0.68	1636656	pos652	0		H	pos	24	949905	734131	1.12179e+06	374431	1048538	452762	1.63666e+06	322221	560955	922249	564280	693370	649192	644099	674586	527596	721095	425044	362326	286905	746414	422114	366128
636.783	11.0525										nFla'nFlaB'UI'UIB		0	bp				0.59	0.59	1622223	pos653	0			pos	23	1.24225e+06	831122	1.17173e+06	1.00667e+06	772387	915219	1.58477e+06	923823	1.62222e+06	591340	0	1.0334e+06	806392	978520	1.2364e+06	949497	921223	709286	873630	1.52493e+06	661693	1563431	1.12986e+06
131.095	10.5977	C6H13NO2	12	L-Isoleucine	10	Central	KEGG_Metacyc_Lipidmaps_HMDB	-0.567256	-0.00297853	-0.8387	nFla'nFlaB'PQC'UI'UIB	L-Isoleucine	0	bp				0.1	0.21	1615406	neg215	0		H	neg	24	909889	987037	1.09496e+06	1.0401e+06	1.00029e+06	778789	724901	838739	1107443	1.12397e+06	1.28806e+06	1.28867e+06	1.09148e+06	1.3289e+06	1.09054e+06	1.31264e+06	1403034	1.48519e+06	1.61541e+06	966302	886345	684580	1.05694e+06
177.115	27.9445		0		#N/A			-0.146751	#N/A		nFla'nFlaB'PQC'UI'UIB	Phenmetrazine	0	bp		3.9	xC13	0.07	0.07	1610011	pos655	0		H	pos	24	1.36396e+06	1.37878e+06	1.25099e+06	1.42017e+06	1.33581e+06	1478355	1.40199e+06	1.42012e+06	1.51887e+06	1.48798e+06	1610011	1.53276e+06	1452202	1.34243e+06	1.43977e+06	1.40378e+06	1.32293e+06	1.42611e+06	1.41592e+06	1.35768e+06	1.52381e+06	1.45693e+06	1.35597e+06
332.062	14.6229		0		#N/A			0.0136869	#N/A		nFla'nFlaB'UI'UIB	5'-Phosphoribosylglycinamide	0	bp		2.9	xC13	0.62	0.62	1609085	neg216	0		Formic Acid	neg	23	363286	281469	324206	299306	403272	874707	345192	464429	510312	618188	0	822173	712809	739929	447232	921249	1.14469e+06	1.60909e+06	638900	675683	817189	739945	430636
631.626	7.45689										nFla'nFlaB'PQC'UI'UIB		0	bp				0.21	0.31	1609007	pos656	0			pos	24	1.08161e+06	833081	953899	1072608	895865	1.19789e+06	821844	903117	1.03971e+06	1.08613e+06	1.20522e+06	936421	825868	1.10178e+06	717755	1.60901e+06	799406	1.08811e+06	984839	1.19962e+06	1.47239e+06	832389	856645
472.112	13.8208	C14H26N4O10P2	2	CMP-N-trimethyl-2-aminoethylphosphonate	8	Central	KEGG	-0.673296	0	2.20738	nFla'nFlaB'PQC'UI'UIB	CMP-N-trimethyl-2-aminoethylphosphonate	0	bp				0.19	0.2	1606301	pos657	0		H	pos	24	586649	637158	916040	642395	850283	967236	960541	829806	930171	709258	1.36611e+06	964135	1.07645e+06	951953	847129	1.26188e+06	1.05466e+06	1.6063e+06	1.0886e+06	1.14666e+06	1.318e+06	1.12406e+06	1335371
275.1	7.7465	C11H17NO7	3	Cardiospermin	7	0	KEGG	-0.608923	-13.0965		nFla'nFlaB'PQC	Cardiospermin	0	bp				0.66	0.66	1604227	pos658	0		H	pos	15	953608	1331402	961373	844933	1.60423e+06	931376	442758	892444	1.03897e+06	1.13136e+06	1.21628e+06	636417	232967	632975	280546	0	0	0	0	0	0	0	0
401.351	7.20901		0		#N/A			0.52003	#N/A		nFla'nFlaB'PQC'UIB	MG(0:0/20:1(11Z)/0:0)	0	bp				0.2	0.87	1596029	pos659	0		NH3	pos	23	673538	396604	352156	1.00756e+06	521298	256509	542084	886450	1596029	457161	731310	503668	762968	655755	879208	412860	181560	580229	0	582305	869139	1.18889e+06	1.1618e+06
790.903	16.0858										nFla'nFlaB'PQC'UI'UIB		0	bp				0.29	0.4	1589038	pos660	0			pos	24	1.0094e+06	1.02357e+06	1.09917e+06	903147	1.26266e+06	1.20819e+06	402498	887281	590853	1.04379e+06	529237	1.20058e+06	1.13116e+06	1.1138e+06	1.29054e+06	596037	1.19171e+06	1.35928e+06	1.4804e+06	989287	1.58904e+06	920075	988876
711.356	16.4289										nFla'nFlaB'PQC'UI'UIB		0	bp				0.21	0.21	1586788	pos661	0			pos	24	1.18343e+06	1.35902e+06	1.45957e+06	1.25568e+06	1.42844e+06	1.28757e+06	959428	1.05639e+06	1.3485e+06	1.23242e+06	855397	1.58679e+06	1.2525e+06	1.28109e+06	1.40275e+06	975849	1.31829e+06	1.29005e+06	1.30356e+06	1359229	1271945	1104552	1.51992e+06
1048.38	17.0684		0		#N/A			2.37445	#N/A		nFla'nFlaB'PQC'UI'UIB	(S)-Hydroxyoctadecanoyl-CoA	0	bp		1.9	xC13x-NH3	0.07	0.24	1585899	pos662	0		H	pos	24	856695	925116	1.0825e+06	1.36481e+06	1.05931e+06	1.04904e+06	950747	928451	1.5859e+06	1.14667e+06	1.37864e+06	1.32108e+06	1.34709e+06	1.17607e+06	1.21863e+06	1.02988e+06	1.10423e+06	1245325	1.23741e+06	1.10102e+06	1.08532e+06	955157	1.16829e+06
141.985	30.4951		0		#N/A			0.609039	#N/A	-0.863375	nFla'nFlaB'PQC'UI'UIB	dimethylthiophosphate	0	bp				0.07	0.34	1584774	neg207	0		H	neg	24	780137	923932	1.08966e+06	1.40134e+06	901243	807162	966821	984481	1.37549e+06	800371	1.40182e+06	1.29542e+06	1273090	1.27789e+06	1.15734e+06	1.23731e+06	1.02276e+06	933660	1.57248e+06	1.1643e+06	672448	799654	1.58477e+06
141.985	4.14024		0		0.2			0.672426	#N/A	-0.778476	nFla'nFlaB'UI'UIB	dimethylthiophosphate	0	bp				0.58	0.58	1584751	neg217	0		H	negneg	23	1.37587e+06	1.28609e+06	1398226	1.37755e+06	1.0113e+06	1322999	1.58475e+06	1.08747e+06	1.23076e+06	1.10339e+06	0	1.21189e+06	1164619	1.05508e+06	1507604	1.2162e+06	1.32051e+06	1.19265e+06	1.02253e+06	1.20176e+06	990681	1.54572e+06	1391669
113.084	2.65949		0		#N/A			0.367828	#N/A	0.360154	nFla'nFlaB'PQC'UI'UIB	epsilon-Caprolactam	0	bp				0.14	0.15	1584078	pos663	0		H	pos	24	1374537	1.53949e+06	1.02847e+06	1.22087e+06	1.27684e+06	1.09616e+06	1.1813e+06	1.37153e+06	1.27105e+06	1392134	1.04693e+06	1.35075e+06	1.02202e+06	1.21164e+06	1.36417e+06	1270056	1.20116e+06	1.2937e+06	1.31688e+06	1.58408e+06	1.3853e+06	1.1678e+06	1.28058e+06
143.058	7.19059		0		0.1			0.0629904	#N/A	0.0159586	nFla'nFlaB'PQC'UI'UIB	Vinylacetylglycine	0	bp	x-NH3			0.33	0.33	1582599	pos664	0		H	pos	24	786224	884459	778462	929278	909351	875996	676444	721936	933562	698129	1.5826e+06	979922	1.00428e+06	825281	716828	1.13826e+06	1.2267e+06	1.27013e+06	1.27226e+06	724998	789230	831643	921432
285.267	7.15605	C17H35NO2	5	Pentadecanoyl-EA	7	0	Lipidmaps	0.265391	44.1032	0.268897	nFla'nFlaB'PQC'UI'UIB	Pentadecanoyl-EA	0	bp				0.18	0.18	1577593	pos665	0		H	pos	24	1.25173e+06	1.09803e+06	1.27611e+06	909501	1.4351e+06	1.18681e+06	1124270	1.05637e+06	1.19676e+06	947278	964911	1.46556e+06	1531290	1.25219e+06	1.52142e+06	1.44957e+06	1.50745e+06	1383571	1.31477e+06	1.1049e+06	1.57759e+06	1.52549e+06	1225312
369.067	17.1623							5.86433			nFla'nFlaB'PQC'UI'UIB		0	bp		C13	xC13	0.28	0.67	1573695	pos645	0			posneg	24	314007	179625	262168	102354	394111	538455	489798	685662	328042	1.03197e+06	1.31871e+06	906337	795324	751979	686059	909023	1573695	701190	545492	534516	1.17417e+06	193765	393060
147.053	10.7372	C5H9NO4	13	O-Acetyl-L-serine	8	Central	KEGG_Metacyc_HMDB	-0.138814	-11.8974	-0.172326	nFla'nFlaB'PQC'UI'UIB	O-Acetyl-L-serine	0	bp				0.31	0.31	1565421	neg222	0		H	neg	24	490900	628002	782626	593071	922744	1.01231e+06	633894	921832	846718	989047	1.56542e+06	1.00491e+06	931831	1.03977e+06	687671	720456	957122	1.00464e+06	884819	671296	927646	828743	640042
141.985	29.686		0		#N/A			0.646367	#N/A	-0.813379	nFla'nFlaB'PQC'UI'UIB	dimethylthiophosphate	0	bp				0.08	0.35	1562852	neg220	0		H	neg	24	706544	860974	1.04629e+06	1.3149e+06	824170	727289	986681	909836	1.26009e+06	781733	1.27367e+06	1.18863e+06	1.12331e+06	1.07415e+06	1.05335e+06	1.08466e+06	894415	787702	1.44107e+06	1.17461e+06	705665	726862	1.56285e+06
369.045	13.3537		0		0.1			-0.858776	#N/A		nFla'nFlaB'PQC'UI'UIB	AMP	0	bp	xNa+			0.35	0.35	1561997	pos666	0		Na	posneg	24	1.4596e+06	1390556	1.562e+06	1.13618e+06	1375303	1.54059e+06	1345361	1.10934e+06	1.26018e+06	1189740	456000	1.02978e+06	930699	1.02404e+06	1414345	899938	805615	1.13482e+06	831766	1.12361e+06	1.39632e+06	1092753	1008641
620.19	14.9821										nFla'nFlaB'PQC'UI'UIB		0	bp				0.31	0.5	1558450	pos667	0			pos	24	587340	736662	685093	291259	614698	630905	591258	585561	218854	644917	590402	1.27266e+06	1.18073e+06	1.35277e+06	1.55845e+06	394217	943290	632409	309469	540301	705205	810687	354262
228.111	13.3502	C10H16N2O4	2	(S)-ATPA	7	0	KEGG	-0.0661137	25.1962	-0.0572342	nFla'nFlaB'PQC'UI'UIB	(S)-ATPA	0	bp				0.16	0.16	1550711	pos669	0		H	pos	24	1.0783e+06	1.1937e+06	1.06078e+06	1.09396e+06	1371475	1322430	926597	1.31654e+06	1.34973e+06	1.29036e+06	1.55071e+06	1.37195e+06	1.15274e+06	1.48572e+06	1.04002e+06	1.05299e+06	1.15785e+06	1.29117e+06	1221827	1.20279e+06	1.18479e+06	1.18456e+06	1.1064e+06
188.066	10.8788	C6H14O5	2	3-deoxy-D-galactose	7	0	Metacyc	0.147692	-5.44351		nFla'nFlaB'PQC'UI'UIB	3-deoxy-D-galactose	0	bp				0.16	0.49	1549737	pos670	0		Na	pos	24	947699	879237	826163	532753	992790	1.2321e+06	983851	1.16954e+06	660427	1229098	739834	1.03543e+06	1.17564e+06	1.03381e+06	959777	1286833	1.54974e+06	973252	367150	1.07984e+06	1.17594e+06	1.09789e+06	265742
175.084	11.5242	C7H13NO4	3	N-Carboxyethyl-g-aminobutyricacid	7	0	HMDB	-0.160326	-14.605	-0.158616	nFlaB'PQC'UI'UIB	N-Carboxyethyl-g-aminobutyricacid	0	bp			xACN	0.36	1.15	1549510	pos671	0		H	pos	24	171445	328826	183163	310874	1.54951e+06	519422	587499	598215	734877	262109	606107	464305	365871	411280	201358	208372	164185	129152	235874	298038	276406	136254	143933
813.978	7.17621	C79H141N3O31	10	Ganglioside GM1 (d18:1/24:1(15Z))	7	0	KEGG_HMDB	0.652031	44.2603		nFla'nFlaB'PQC'UI'UIB	Ganglioside GM1 (d18:1/24:1(15Z))	0	bp		-13.8	xC13xC13	0.14	0.23	1546173	neg223	0		2-charge	neg	24	894108	959754	1.54617e+06	1.11651e+06	1012607	1.06471e+06	866659	823600	1.09893e+06	988834	1.31349e+06	1.31051e+06	991826	1.01324e+06	1.08479e+06	958898	1.29062e+06	1.18796e+06	970447	990013	967905	885543	807930
243.122	12.6234	C10H17N3O4	2	Ala-Gly-Pro	7	0	Peptides	0.306692	-7.03193	0.343057	nFla'nFlaB'PQC'UI'UIB	Ala-Gly-Pro	0	bp				0.22	0.54	1545158	pos672	0		H	pos	24	948244	925451	734905	687295	1545158	923248	647156	952594	747046	964156	1.12635e+06	1050952	923416	954971	583119	1034416	1.08932e+06	1.29298e+06	186809	642916	1.06241e+06	804588	701917
752.555	3.9857				0.1						nFla'nFlaB'PQC'UI'UIB		0	bp	xC13			0.18	0.18	1539344	neg225	0			neg	24	1.16142e+06	1.31106e+06	1.5088e+06	1.04098e+06	1.53934e+06	883714	899049	1.0415e+06	1.12692e+06	1.09934e+06	752928	1.2645e+06	1.10931e+06	1.07572e+06	1.11166e+06	1278858	1.50589e+06	1.34826e+06	1.09639e+06	988633	1.07642e+06	847078	955682
259.178	5.01269	C13H25NO4	2	Hexanoylcarnitine	7	0	HMDB	-0.390022	-0.1841	-0.405057	nFla'nFlaB'PQC'UI'UIB	Hexanoylcarnitine	0	bp				0.12	0.36	1538660	pos673	0		H	pos	24	799047	879293	644637	552055	669843	902956	830853	730792	903958	1.06097e+06	1538660	1.15325e+06	1.23555e+06	1274604	1.48085e+06	507117	1.23287e+06	951824	746075	997622	902665	759104	699800
146.106	12.0367	C6H14N2O2	8	mildronate	7	0	Metacyc	-0.200379	24.5255	-0.203569	nFla'nFlaB'PQC'UI'UIB	mildronate	0	bp			x-NH3	0.08	0.3	1535463	pos674	0		H	pos	24	1.49461e+06	926087	1.03758e+06	734084	1.21123e+06	1.53546e+06	1.51751e+06	944408	1.01601e+06	1.11396e+06	987873	1.05824e+06	971611	1143052	1.15691e+06	977060	672264	1401543	1.21556e+06	904937	772133	1.1981e+06	754634
510.296	3.62041	C24H47O9P	3	[PG (18:1)] 1-(9E-octadecenoyl)-sn-glycero-3-phospho-(1'-sn-glycerol)	7	0	Lipidmaps	-0.134143	-10.4846	-0.140973	nFla'nFlaB'PQC'UI'UIB	[PG (18:1)] 1-(9E-octadecenoyl)-sn-glycero-3-phospho-(1'-sn-glycerol)	0	bp		-1.6	xC13	0.24	0.24	1530960	neg226	0		H	neg	24	700790	719909	799439	645234	774302	712637	720823	723798	853204	733150	1.53096e+06	1.10885e+06	937478	916407	911390	916165	1.01525e+06	1.22098e+06	1.32054e+06	668442	859329	854269	965389
294.143	16.7705		0		#N/A			-1.86897	#N/A		nFla'nFlaB'PQC'UI'UIB	S-(2-Methylpropanoyl)-dihydrolipoamide	0	bp		-0.2	xC13	0.05	0.11	1524378	pos675	0		NH3	pos	24	1.19321e+06	1.0129e+06	1.05826e+06	1.00053e+06	1.0568e+06	1.24831e+06	1.115e+06	1.03982e+06	1.11639e+06	1.28067e+06	1.11023e+06	1.15454e+06	1.22552e+06	1.07663e+06	1.13645e+06	1.25405e+06	1.52438e+06	1.46076e+06	1386849	1.03411e+06	1.40704e+06	1251392	1.25548e+06
275.159	15.0651	C10H21N5O4	1	Thr-Arg	7	0	Peptides	0.308163	-23.622		nFla'nFlaB'PQC'UI'UIB	Thr-Arg	0	bp				0.21	0.35	1523594	pos676	0		H	pos	24	1.06289e+06	1.01631e+06	1.1299e+06	742958	1212620	1.10642e+06	834952	997113	682654	1.06365e+06	615032	1.07545e+06	1.0438e+06	1.05929e+06	1.10815e+06	1.34124e+06	1.52359e+06	1.3358e+06	701159	590195	1.04717e+06	1.30068e+06	557962
850.635	15.2782										nFla'nFlaB'UI'UIB		0	bp				0.56	0.56	1517912	pos677	0			pos	23	932354	1163511	1.17941e+06	724280	1.4766e+06	610089	668639	821019	840808	919426	0	1.37899e+06	1.39132e+06	1.35394e+06	1.51791e+06	710134	1447451	1.13399e+06	813271	633406	641608	661322	740457
197.09	14.4751	C6H12O6	52	D-Glucose	8	Central	KEGG_Metacyc_HMDB	-2.01645	6.09191		nFla'PQC'UI'UIB	D-Glucose	0	bp				0.52	0.94	1517456	pos510	0		NH3	pos	23	331838	565563	363598	680364	565221	304941	0	622649	1272450	358364	1.51746e+06	1.00876e+06	806749	722435	272547	697035	210194	814031	1.36904e+06	1.32165e+06	499034	126208	1.04783e+06
167.062	27.4522										nFla'nFlaB'PQC'UI'UIB		0	bp				0.04	0.15	1516899	neg227	0			negpos	24	1.45346e+06	1.33049e+06	1.29777e+06	1.22313e+06	1.37959e+06	1.47168e+06	1.43777e+06	1.34924e+06	1105971	1516899	1.28314e+06	1.30486e+06	1178300	1.24529e+06	1.1934e+06	1.34949e+06	1.49184e+06	1.43952e+06	1036551	1.26431e+06	1.39556e+06	1477118	1.07225e+06
334.067	15.9443	C9H19O11P	4	sn-glycero-3-Phospho-1-inositol	7	0	KEGG_Metacyc_HMDB	0.798857	0.921896		nFla'nFlaB'PQC'UI'UIB	sn-glycero-3-Phospho-1-inositol	0	bp			xK+	0.36	0.36	1513119	pos678	0		H	posneg	24	685197	696156	800193	516467	972412	559880	664450	574773	542041	693192	1.51312e+06	861016	683469	705602	918010	564661	783807	792480	788750	490389	574728	544235	661118
268.088	7.16276		0		0.4			0.691393	#N/A	-1.77048	nFla'nFlaB'UI'UIB	Phe-Cys	0	bp				0.94	0.94	1511662	pos548	0		H	posneg	22	405260	481858	436707	470096	595019	682686	354670	730797	407336	730775	844703	0	725119	592451	0	1.51166e+06	389886	1442434	947888	687554	416862	665775	762650
303.155	16.445	C11H21N5O5	1	Glu-Arg	7	0	Peptides	1.05957	-18.1302	1.1331	nFla'nFlaB'PQC'UI'UIB	Glu-Arg	0	bp				0.21	0.21	1507084	pos679	0		H	pospos	24	997923	1.14395e+06	887429	910263	1.00898e+06	1004678	804322	1213424	766130	848375	495989	873171	850714	817300	867080	1.42354e+06	1.10745e+06	1.50708e+06	1.2736e+06	854999	910417	1.07719e+06	886602
203.091	13.1283	C7H13N3O4	3	Ala-Asn	7	0	Peptides	-0.332527	-25.0433	-0.346833	nFla'nFlaB'PQC'UI'UIB	Ala-Asn	0	bp			xACN	0.31	0.31	1498878	pos680	0		H	pos	24	956992	1.08479e+06	731657	695858	1.21635e+06	876159	567191	949785	581727	927559	1.49888e+06	981632	918455	929213	643311	1.04438e+06	1.01428e+06	1.28164e+06	729341	755162	913034	1.02139e+06	563817
224.114	7.17888		0		0.1			0.506058	#N/A		nFla'nFlaB'UI'UIB	Ile-Ala	0	bp	xNa+			0.95	0.95	1495248	pos681	0		Na	pos	22	747732	744715	748660	754897	702388	783666	1.49525e+06	879752	710440	578739	0	0	572519	745474	876799	1.33236e+06	851691	1.00806e+06	695063	895662	551148	1.39702e+06	676833
231.835	15.3963				0.2						nFla'nFlaB'UI'UIB		0	bp				0.72	0.72	1488598	pos682	0			pos	23	1.4886e+06	1176140	445108	684058	1.4025e+06	1.26465e+06	640174	1.27548e+06	527184	1.45536e+06	0	722949	1.38399e+06	1.36841e+06	568220	1.22197e+06	1.18715e+06	1.17408e+06	853808	792048	1.19152e+06	944196	397022
274.128	12.9097	C10H18N4O5	5	N2-Succinyl-L-arginine	8	Central	KEGG_Metacyc	0.34979	-1.34505	0.384623	nFla'nFlaB'PQC'UI'UIB	N2-Succinyl-L-arginine	0	bp				0.32	0.32	1482556	pos683	0		H	pos	24	767433	784218	669344	559938	1.07891e+06	823317	480537	832349	609512	716057	1.42505e+06	961527	899326	871075	597195	1.07547e+06	1.0991e+06	1.48256e+06	871960	621430	826142	797367	580825
218.019	16.8646	C9H8O5	3	3-(2-propenoic acid)-4,6-hydroxy cyclohexa-2,5-dienone	7	0	Metacyc	1.35334	43.8704		nFla'nFlaB'PQC'UI'UIB	3-(2-propenoic acid)-4,6-hydroxy cyclohexa-2,5-dienone	0	bp				0.55	0.55	1478010	pos684	0		Na	pos	24	1.33894e+06	777500	712548	753977	1.20464e+06	1.47104e+06	1.08218e+06	1.0575e+06	746459	1.31229e+06	37221.3	755470	977886	1.0516e+06	896305	1.07832e+06	1478010	1.20362e+06	719679	711281	1.39826e+06	1.38454e+06	491252
275.188	0.674968		0		#N/A			-1.09071	#N/A	-1.15102	nFla'nFlaB'PQC'UI'UIB	Lycoflexine	0	bp				0.14	0.14	1473792	pos686	0		H	pos	24	1.13704e+06	1.14552e+06	883793	1.19017e+06	1.19178e+06	987015	1.02561e+06	1.22678e+06	1.13207e+06	1.20001e+06	1473792	1.21899e+06	1.10195e+06	1.21357e+06	1.01039e+06	1.18085e+06	1.1255e+06	1.21546e+06	1.21515e+06	1.05106e+06	1.24146e+06	958504	1.12985e+06
811.537	3.93827	C44H78NO10P	18	PS(38:4)	8	Central	0	0.212853	-1.56746	0.229564	nFla'nFlaB'PQC'UI'UIB	PS(38:4)	0	bp				0.24	0.25	1462246	neg230	0		H	neg	24	968192	1.24974e+06	1.30177e+06	756680	1.46225e+06	1.05972e+06	686837	1.00654e+06	1.02859e+06	1.14204e+06	1.37264e+06	1.04153e+06	907920	887567	750934	1.25816e+06	1.23618e+06	1.29751e+06	1.05649e+06	832822	929121	782354	787765
597.06	19.6784	C15H22N2O18P2	3	UDP-glucuronate	8	Central	KEGG_Metacyc_HMDB	-1.19898	0		nFla'nFlaB'PQC'UI'UIB	UDP-glucuronate	0	bp				0.25	0.57	1461796	pos687	0		NH3	posneg	24	1372836	585874	625359	520660	1.21478e+06	685404	756211	637188	459663	1461796	1.37251e+06	978345	903554	785075	780197	591132	1.13028e+06	578160	280397	362777	1.0546e+06	727265	283276
837.55	3.81005	C46H80NO10P	16	PS(40:5)	8	Central	0	-1.86973	-4.98541	-1.97461	nFla'nFlaB'PQC'UI'UIB	PS(40:5)	0	bp				0.25	0.25	1460350	neg231	0		H	neg	24	994354	1.03143e+06	1.12787e+06	828284	1.46035e+06	910387	702701	1.00644e+06	960680	1.06756e+06	1.42374e+06	1.08315e+06	893753	872088	799312	1.1485e+06	1.04307e+06	1.30226e+06	1.09581e+06	935018	958843	846449	895586
253.116	12.453							-5.96507			nFlaB'PQC		0	bp				0.41	1.5	1458411	pos688	0			pos	18	63014.3	212545	69821.2	182259	1.45841e+06	87151.2	254386	620007	390014	76343.9	413053	321031	253558	304965	103509	0	0	120181	0	215345	0	200662	0
203.127	16.6547	C8H17N3O3	1	Lys-Gly	7	0	Peptides	0.421319	-10.2033	0.475986	nFla'nFlaB'PQC'UI'UIB	Lys-Gly	0	bp				0.16	0.16	1451047	pos689	0		H	pos	24	1.2708e+06	1.33389e+06	1.15041e+06	889256	1227772	1.24297e+06	977661	1.16923e+06	880042	1.09054e+06	717190	966290	1.1248e+06	1039448	986737	1.39122e+06	1.20367e+06	1.45105e+06	1.28807e+06	901451	1.14147e+06	1.25548e+06	1.14016e+06
239.866	15.1368										nFla'nFlaB'UI'UIB		0	bp				0.65	0.65	1450080	neg232	0			neg	23	1.3382e+06	844010	419856	699782	1.00557e+06	796016	1.08361e+06	1.19334e+06	606350	1252124	0	676572	1.15779e+06	1.12349e+06	649994	956588	1.03577e+06	766965	458338	682427	979380	1.45008e+06	306699
1069.31	17.0983				0.1						nFla'nFlaB'PQC'UI'UIB		0	bp	xK+	C46	xC13	0.53	0.53	1448920	pos690	0			pos	24	1.04606e+06	1.01837e+06	921132	1.44892e+06	1.15314e+06	1.30558e+06	1.04032e+06	1.17673e+06	1.18323e+06	1.17409e+06	74848.6	976888	1.27889e+06	976601	1.05061e+06	1.29014e+06	1032760	1.2214e+06	1055860	1.03921e+06	974682	1211527	874980
126.065	11.0948		0		#N/A			-0.378339	#N/A		nFla'nFlaB'PQC'UI'UIB	Melamine	0	bp				0.19	0.38	1448147	pos691	0		H	pos	24	794539	490517	541828	484000	695300	757242	866325	1.44815e+06	776031	562330	950542	902054	729333	938117	583260	592047	906929	459137	729443	860919	931408	483732	510412
216.099	7.08359										nFla'nFlaB'PQC'UI'UIB		0	bp				0.25	0.25	1443833	pos692	0			pos	24	1.20005e+06	1.18566e+06	1.26931e+06	1.07887e+06	1.02128e+06	888471	997835	932111	946921	822359	828668	1.04122e+06	810244	998716	1.44383e+06	934663	991714	1.03672e+06	754787	1075205	954069	1.31416e+06	1203465
129.062	14.1927				0.1						nFla'nFlaB'PQC'UI'UIB		0	bp	xC13			0.11	0.26	1442958	pos693	0			pos	24	1.00708e+06	1.07826e+06	716588	1050229	653353	1.08445e+06	835287	1110939	1.31377e+06	655057	1.20477e+06	1.29024e+06	1.13446e+06	1.44296e+06	1.10543e+06	1.07547e+06	1.20499e+06	1.12979e+06	1.14322e+06	1.15538e+06	643341	977884	1.18453e+06
657.643	7.40355										nFla'nFlaB'UI'UIB		0	bp				0.62	0.62	1440061	pos694	0			pos	23	1.23212e+06	968676	886110	1.16393e+06	853134	1.27388e+06	1.27461e+06	1.21618e+06	1.29781e+06	1.33901e+06	0	1146274	716795	1.31471e+06	1.06794e+06	1.38262e+06	618206	1.30108e+06	1.06845e+06	1175367	1.44006e+06	1.36596e+06	1.17394e+06
506.115	15.8013	C20H24N2O12	1	3-(O-&beta;-glucosyl)-2-oxindole-3-acetyl-asp	7	0	Metacyc	-0.292101	0		nFla'nFlaB'PQC'UI	3-(O-&beta;-glucosyl)-2-oxindole-3-acetyl-asp	0	bp		1.4	xC13	0.07	0.81	1436093	pos695	0		Na	pos	23	322784	881883	1.18447e+06	1.43609e+06	792962	545978	555276	576352	1.14661e+06	298719	688666	627276	604268	576082	611242	444023	170346	871555	1.27689e+06	523213	0	616983	1.23657e+06
363.057	14.4574				0.1			-3.78878			nFla'nFlaB'UI'UIB		0	bp	xK+			0.6	0.6	1435569	pos696	0			pos	23	1.20119e+06	1.09541e+06	1.02202e+06	1.17983e+06	1.43557e+06	1.22001e+06	725889	1.14192e+06	982691	1.33021e+06	0	994607	1.23551e+06	1.17418e+06	761273	904655	1.0146e+06	1.21397e+06	994268	905822	1.10484e+06	882656	1.00717e+06
118.009	11.4414				0.4						nFla'nFlaB'UI'UIB		0	bp				0.85	0.85	1435428	pos654	0			pos	23	177902	196361	219374	344883	594957	301470	184294	417580	212330	546347	1.43543e+06	564443	486508	576210	0	613422	512423	622539	522083	194849	341218	159658	197240
711.499	16.4335										nFla'nFlaB'PQC'UI'UIB		0	bp				0.25	0.25	1434616	pos697	0			pos	24	929720	1.19616e+06	1.19301e+06	1.24833e+06	983914	846976	995735	887157	1.07685e+06	938126	688980	1.43462e+06	1.08681e+06	1.16377e+06	1.03003e+06	821514	710432	983497	1.05859e+06	972249	1.04703e+06	672702	1.17289e+06
330.826	14.9966										nFla'nFlaB'UI'UIB		0	bp			xCl37	0.69	0.73	1424152	pos698	0			pos	23	257558	710059	685787	887132	435693	385601	505308	618137	702154	297696	0	646709	1.42415e+06	1.15181e+06	721246	946366	497784	545359	404113	676563	132158	283895	389513
745.205	15.5456		0		0.1			-1.5082	#N/A		nFla'nFlaB'PQC'UI'UIB	Primflaside	0	bp	xK+			0.42	0.42	1423686	pos699	0		NH3	pos	24	779909	1.02637e+06	1.12128e+06	941937	1.12801e+06	1.10616e+06	1.02015e+06	1.01832e+06	1170848	1.03515e+06	250788	1.17952e+06	1.16497e+06	999583	1.11912e+06	954863	1.11817e+06	1.17516e+06	1423686	1.11828e+06	804600	1.04418e+06	1.2591e+06
194.115	7.09527										nFla'nFlaB'PQC'UI'UIB		0	bp				0.17	0.17	1420080	pos700	0			pos	24	1.09579e+06	1250745	1.02402e+06	1.03149e+06	1.28655e+06	1.2777e+06	864096	1.18649e+06	1.40803e+06	1148345	1.39609e+06	1.34779e+06	1.14867e+06	1.29441e+06	881741	1.21372e+06	1.0429e+06	1.3077e+06	1.42008e+06	1.30392e+06	1138518	1.28624e+06	1.24787e+06
185.214	7.81625	C12H24	1	1-Dodecene	7	0	Lipidmaps	-0.259565	48.8246		nFla'nFlaB'PQC'UI'UIB	1-Dodecene	0	bp				0.07	0.34	1416271	pos701	0		NH3	pos	24	1108231	746930	635313	1.41627e+06	932445	429143	821489	862520	1.23882e+06	943301	993121	1.14998e+06	1190575	1.17081e+06	1.19827e+06	1.06471e+06	1.15456e+06	1149898	1.12708e+06	1.14678e+06	1115330	594641	564821
372.971	11.8557				0.4						nFla'nFlaB'UI'UIB		0	bp				1.07	1.07	1416109	pos703	0			pos	23	1009965	955518	1.41611e+06	816523	294961	474236	962981	299175	902411	222278	0	366766	404186	208669	1260300	233851	660028	483795	456985	778490	326380	771185	952270
177.115	10.9528	C11H15NO	2	Phenmetrazine	7	0	KEGG	-0.259107	37.5141		nFla'nFlaB'PQC'UI'UIB	Phenmetrazine	0	bp				0.12	0.12	1415137	pos704	0		H	pos	24	1.02093e+06	1128529	1.02221e+06	1.17489e+06	1.17227e+06	1.30531e+06	1.00833e+06	1.32482e+06	1.16459e+06	1.15716e+06	1.30723e+06	1.16482e+06	1180893	1.10396e+06	926902	1187986	1.11309e+06	956253	1.1346e+06	1.10917e+06	1.41514e+06	1104447	1.14973e+06
433.18	15.4995	C16H27N5O9	6	Ala-Thr-Asp-Gln	7	0	Peptides	-2.81315	-3.22907	-0.803999	nFlaB'PQC'UI'UIB	Ala-Thr-Asp-Gln	0	bp				0.59	0.84	1409272	pos705	0		H	pos	23	326105	158082	0	595686	241111	245100	590596	935773	666104	369287	1.40927e+06	555696	540321	419718	532728	758545	196383	179781	787525	1.03884e+06	190814	822161	545317
159.101	10.8136	C6H13N3O2	1	delta-Guanidinovaleric acid	7	0	KEGG_Metacyc	-0.173208	7.05304	-0.17285	nFla'nFlaB'PQC	delta-Guanidinovaleric acid	0	bp				0.24	0.68	1391734	pos708	0		H	pos	22	931118	1.05797e+06	693846	597541	971046	1.15073e+06	941079	1.27025e+06	618667	1.16113e+06	1.25009e+06	1.39173e+06	1.08173e+06	1.10026e+06	680325	1.0649e+06	1.00288e+06	1.28187e+06	0	674312	1.11139e+06	1.05931e+06	0
254.138	8.81043		0		#N/A			-0.364014	#N/A		nFla'nFlaB'PQC'UI'UIB	Homoanserine	0	bp				0.45	0.45	1391109	pos702	0		H	pos	24	825691	802732	631581	504516	921621	703941	552141	808950	651848	879091	1.39111e+06	899340	264416	1.03885e+06	941380	1.14423e+06	436978	942057	578421	762132	865978	662723	832680
838.054	10.6573				0.2						nFla'nFlaB'UI'UIB		0	bp				0.64	0.64	1387714	neg233	0			neg	23	1.27021e+06	1.05164e+06	1.19365e+06	1075268	849762	990156	1.38771e+06	951696	940453	765851	0	1.04717e+06	781281	796198	1.38222e+06	801300	1.08456e+06	909939	780345	1.08715e+06	769693	1.0141e+06	1.19209e+06
909.715	9.58452										nFla'nFlaB'UI'UIB		0	bp			x-CO2	0.63	0.63	1383530	neg234	0			neg	23	1.09851e+06	1.07201e+06	1.38353e+06	1.09484e+06	935125	988307	1.34165e+06	745906	1.06841e+06	841157	0	869048	924832	774349	1.36383e+06	931891	1.07381e+06	926656	904966	1.0283e+06	854750	1.15709e+06	1108069
808.644	12.4997		0		#N/A			0.726806	#N/A		nFla'nFlaB'PQC'UI'UIB	SM(d40:1)	0	bp				0.35	0.4	1381302	pos709	0		Na	pos	24	524452	798840	539452	486207	1.15347e+06	505780	326326	655523	700092	727778	748097	1.3813e+06	1011055	1.27136e+06	539930	680038	1.14773e+06	1.11486e+06	792036	488772	695706	586508	635933
214.193	3.71486	C13H26O2	26	FA methyl(12:0) dodecanoic acid	8	Central	Lipidmaps	-0.00908486	-7.67576	0.00626731	nFla'nFlaB'PQC'UI'UIB	FA methyl(12:0) dodecanoic acid	0	bp				0.09	0.36	1380087	neg236	0		H	neg	24	579620	761553	712385	840723	738105	579404	633820	1.22353e+06	881001	763869	415951	450296	524085	506760	450957	630881	1.12901e+06	529124	738212	960100	1.38009e+06	791474	867982
563.373	19.9492										nFla'nFlaB'PQC'UI'UIB		0	bp				0.22	0.28	1379532	pos710	0			pos	24	850162	801041	811763	660084	954598	649546	725731	1.27582e+06	875317	820055	1379532	1.02067e+06	788661	975476	886977	584066	887891	704598	998790	1.33592e+06	896299	918806	1.19949e+06
268.033	12.7843		0		0.1			0.485441	#N/A		nFla'nFlaB'PQC'UI'UIB	Glycerophosphoglycerol	0	bp	xNa+		xNa+	0.22	0.22	1378764	pos706	0		Na	posneg	24	951366	1.13464e+06	1.23881e+06	838182	1.17548e+06	966801	903576	932596	1.31542e+06	907878	1.37876e+06	890841	942663	822314	1.02741e+06	765463	914638	1.11793e+06	903689	838422	795852	846132	657193
310.181	3.51269		0		#N/A			0.47898	#N/A		nFla'nFlaB'PQC'UI'UIB	Ropivacaine	0	bp				0.04	0.48	1372975	neg237	0		Cl	neg	24	831166	577179	497474	525279	1.37298e+06	351192	792475	619401	686080	525068	785984	748190	738423	714780	781916	487684	536190	521938	498678	820886	1.2307e+06	459102	782339
437.11	18.4393										nFla'nFlaB'PQC		0	bp		C16	xC13	0.05	0.13	1372649	pos711	0			pos	16	1140068	1.13332e+06	1372649	988790	1.29019e+06	635599	555102	531862	574971	601714	596835	559931	616741	577456	535347	0	0	61770.1	0	0	0	0	0
356.242	20.1946		0		#N/A			0.240319	#N/A		nFla'nFlaB'PQC'UI'UIB	Ile-Lys-Pro	0	bp		3.2	x2+xC13	0.03	0.12	1367914	pos712	0		H	pos	24	995283	911336	1.18361e+06	938066	951955	1.16173e+06	947984	903760	1.20979e+06	1072381	1.17746e+06	1.14479e+06	1.21794e+06	1.15859e+06	1.12107e+06	1.09748e+06	1115761	1.36791e+06	1.19829e+06	1.14829e+06	1.16471e+06	1.17264e+06	1.18781e+06
209.126	9.05995	C8H16O5	3	D-Mycinose	7	0	KEGG	-0.255138	25.7144		nFla'nFlaB'PQC'UI'UIB	D-Mycinose	0	bp				0.12	0.33	1363641	pos713	0		NH3	pos	24	1.05426e+06	1.01819e+06	774903	937690	1.25616e+06	1.31113e+06	881305	1.14286e+06	982703	1.10837e+06	1041272	1363641	1.21782e+06	1.1354e+06	1.00816e+06	837068	795317	1.22445e+06	1.05533e+06	1.28801e+06	815714	757616	1.11617e+06
308.158	18.3428	C12H24N2O7	1	psicoselysine	7	0	Metacyc	0.483151	3.59434	-2.46662	nFla'nFlaB'PQC'UI'UIB	psicoselysine	0	bp				0.08	0.26	1363015	pos714	0		H	pos	24	951824	692490	919189	825776	1.22378e+06	723781	828312	816151	1.01683e+06	982528	1.32766e+06	1363015	1.20889e+06	1.14013e+06	1155697	1.06161e+06	1.16661e+06	983209	1.08428e+06	824041	850864	466544	1.04832e+06
622.436	16.3752										nFla'nFlaB'PQC'UI'UIB		0	bp				0.23	0.23	1360401	pos715	0			pos	24	1106648	818225	1.01303e+06	768527	986468	984278	662193	772418	1.04156e+06	880082	500443	933888	944841	904251	972062	792682	1.07545e+06	1.1833e+06	1.3604e+06	904884	829585	1124819	758203
174.137	9.40913	C8H18N2O2	1	Ne,Ne dimethyllysine	7	0	KEGG_HMDB	-0.0190951	-38.0776	-0.00206968	nFla'nFlaB'PQC'UI'UIB	Ne,Ne dimethyllysine	0	bp				0.15	0.15	1353983	pos685	0		H	pos	24	1.05496e+06	1118111	931676	897184	1.10462e+06	1.07489e+06	869239	973374	921391	1.05412e+06	1.21241e+06	1.35398e+06	1.24516e+06	1.01301e+06	919734	1.05795e+06	1.16435e+06	1.20927e+06	1.10652e+06	1.00887e+06	934511	883035	1.028e+06
88.1001	19.1463	C4H12N2	1	Putrescine	8	Central	KEGG_Metacyc_HMDB	0.558627	-42.5981	0.734662	nFlaB'UIB	Putrescine	0	bp				0.68	1.17	1351557	pos716	0		H	pos	20	821929	934855	873825	459127	0	961550	174944	862524	483135	743164	0	334815	612701	597578	869844	0	0	776768	611268	935614	1351557	842785	639340
177.983	6.37089										nFla'nFlaB'UI'UIB		0	bp				0.74	0.74	1345921	neg240	0			neg	23	702283	765684	1.09338e+06	846828	633882	782620	1.34592e+06	590967	763185	458850	0	594699	525150	446843	1097523	694411	782735	661340	462918	707117	494173	1.0534e+06	881901
286.02	17.7782				0.1						nFla'nFlaB'PQC'UI'UIB		0	bp	xK+			0.48	0.48	1342033	pos717	0			pos	24	964958	637682	630129	395850	1.29083e+06	691383	714217	752439	469319	1.09292e+06	143775	862886	1.00317e+06	1.12559e+06	800082	784182	1.34203e+06	930007	418705	466398	1.032e+06	722209	356206
265.277	7.23983		0		0.1			-0.421551	#N/A		nFla'nFlaB'PQC'UI'UIB	3Z,6Z,9Z-Octadecatriene	0	bp	x-H2O			0.14	0.17	1334790	pos719	0		NH3	pos	24	1.04633e+06	918703	973250	1057240	942228	944587	1.06648e+06	948665	962793	1.04225e+06	1.33479e+06	1.09662e+06	1.30862e+06	1.00695e+06	984570	1.26349e+06	858636	1.13294e+06	1.24447e+06	1.05959e+06	1298752	1.16661e+06	1.17932e+06
129.025	7.17991										nFla'nFlaB'PQC'UI'UIB		0	bp			xFA	0.13	0.71	1331183	neg243	0			neg	24	494669	789454	1331183	360776	666086	514433	371867	458511	537832	318044	355792	475294	423326	346721	409718	275269	229834	862005	307711	346446	193684	355018	481090
201.035	11.8643							-3.05708			nFla'nFlaB'PQC'UI'UIB		0	bp				0.38	0.38	1328237	pos720	0			pos	24	1.0674e+06	1.30056e+06	1.07354e+06	1.26225e+06	773018	839364	876126	604364	1.1366e+06	490218	267123	968923	917227	752321	973690	692536	1.32824e+06	1.21017e+06	1.20194e+06	1080659	825023	1.02575e+06	1.28524e+06
228.209	27.9177		0		#N/A			0.210902	#N/A	0.280618	nFla'nFlaB'PQC'UI'UIB	Tetradecanoic acid	0	bp		0.9	xC13	0.03	0.05	1315774	neg245	0		H	neg	24	1160636	1.23367e+06	1.18277e+06	1.31506e+06	1.20771e+06	1.24057e+06	1302272	1246997	1.2043e+06	1.2792e+06	1288737	1.28584e+06	1.21403e+06	1.27774e+06	1.29863e+06	1261930	1.30674e+06	1.27312e+06	1.24488e+06	1.20048e+06	1.19191e+06	1.31577e+06	1.27119e+06
258.085	12.8713	C10H14N2O6	3	(1-Ribosylimidazole)-4-acetate	8	Central	KEGG_HMDB	0.278332	-6.55874	0.310436	nFla'nFlaB'PQC'UI'UIB	(1-Ribosylimidazole)-4-acetate	0	bp				0.07	0.18	1314511	pos721	0		H	pos	24	741025	772891	973913	923943	1.1062e+06	792927	694162	723258	719382	749367	857528	857008	810565	820412	719346	912154	960226	1314511	963684	580537	666490	691315	658122
380.138	13.4814	C13H24N4O7S	3	Ala-Thr-Cys-Ser	7	0	Peptides	2.81808	-15.6629	1.16839	nFla'nFlaB'PQC'UI'UIB	Ala-Thr-Cys-Ser	0	bp				0.41	0.41	1306085	pos722	0		H	pos	24	441240	427001	423393	360114	425645	881045	706835	758971	585018	905290	1.30609e+06	744292	605389	901490	451576	923717	632989	871027	731650	924198	943245	792636	469652
146.106	21.9284	C6H14N2O2	8	L-Lysine	10	Central	KEGG_Metacyc_HMDB	0.110324	-0.533461		nFla'nFlaB'PQC'UI'UIB	L-Lysine	0	bp				0.07	0.17	1305715	neg247	0		H	neg	24	1.05762e+06	1.24582e+06	1.30572e+06	1143098	1.28551e+06	919745	762094	927435	1.16777e+06	1.02283e+06	1.05985e+06	1.09013e+06	1.12566e+06	1128819	955754	657113	854986	931768	987425	993299	1.05631e+06	827454	1197429
356.115	16.2953										nFla'nFlaB'PQC'UI'UIB		0	bp				0.23	0.23	1305264	pos723	0			pos	24	792138	879982	997754	838173	889842	1.06239e+06	1.0308e+06	1.22254e+06	1.09237e+06	1058675	407434	779033	790710	742158	757014	1.19079e+06	933718	1.30526e+06	1.00393e+06	873324	854277	1.02814e+06	1124286
229.241	9.60207		0		#N/A			0.594026	#N/A	0.6087	nFla'nFlaB'PQC'UI'UIB	[SP (14:0)] 1-deoxy-tetradecasphinganine	0	bp				0.29	0.29	1304662	pos724	0		H	pos	24	1.12266e+06	1.30466e+06	1.07643e+06	969589	1.20304e+06	1.1234e+06	720658	922906	1.00686e+06	849977	1.01412e+06	844685	590037	729780	479504	1.16719e+06	630341	969194	913199	997140	821824	850776	960787
275.159	15.6039	C10H21N5O4	1	Thr-Arg	7	0	Peptides	-2.45787	-19.3533		nFla'nFlaB'PQC'UI'UIB	Thr-Arg	0	bp				0.25	0.25	1302088	pos725	0		H	pos	24	1.10262e+06	1.14757e+06	1.07722e+06	787992	1.30209e+06	1.03101e+06	1.07723e+06	995777	679448	1101448	488212	990798	986016	1.01089e+06	913361	1.21052e+06	1.24857e+06	1.11595e+06	1.00205e+06	810816	1.13877e+06	1.20057e+06	768516
610.537	3.4426				0.1						nFla'nFlaB'UI'UIB		0	bp	xC13			0.63	0.63	1298623	pos726	0			pos	23	1.09694e+06	1.29814e+06	1.11228e+06	1.22896e+06	994348	959755	1070308	1.05735e+06	1.18747e+06	1.2787e+06	0	852087	769094	1.26683e+06	767970	445165	1.24008e+06	1.06122e+06	1.05125e+06	669242	1.05343e+06	1.09249e+06	481145
156.076	6.15183										nFla'nFlaB'UI'UIB		0	bp				0.74	0.74	1293206	pos727	0			pos	23	913794	1.18078e+06	1.29321e+06	996216	550628	688530	965148	403647	1.02421e+06	515413	0	581834	481932	699227	1.23e+06	802663	565686	423272	372926	483162	204235	877181	976050
571.042	19.8772										nFla'nFlaB'PQC'UI'UIB		0	bp				0.18	0.32	1288172	pos728	0			pos	24	761612	826667	1.16975e+06	819359	1.28817e+06	901139	579873	496340	975553	584976	667362	576577	795714	815848	912744	338978	474278	554056	533481	538699	751193	384289	343791
201.064	14.4875		0		0.1			-0.568091	#N/A		nFla'nFlaB'PQC'UI'UIB	3-O-Methylgallate	0	bp	x-NH3			0.52	0.52	1282145	pos730	0		NH3	pos	24	342685	423177	309726	454406	484669	462394	295835	566911	635156	624811	1.28215e+06	605306	583824	663395	311496	555040	410604	731053	647402	462225	545131	448199	366250
175.121	7.15059	C8H14O3	10	FA oxo(8:0) oxo-octanoic acid	8	Central	Lipidmaps_HMDB	-0.2016	28.1562		nFla'nFlaB'PQC'UI'UIB	FA oxo(8:0) oxo-octanoic acid	0	bp				0.11	0.12	1280610	pos731	0		NH3	pos	24	1.03314e+06	1.28061e+06	1.1349e+06	1.26677e+06	1.12528e+06	977124	1.03327e+06	972474	974317	1.18778e+06	1.08582e+06	948488	835933	842403	1.00546e+06	1.26687e+06	953655	1075389	1.03601e+06	998695	1152333	1.24982e+06	990392
791.405	16.1188		0		0.1			-2.87296	#N/A		nFla'nFlaB'PQC'UI'UIB	Niddamycin	0	bp	xC13			0.31	0.31	1271544	pos733	0		Na	pos	24	886892	1.02777e+06	1.03327e+06	845810	940674	795635	452981	1.03069e+06	993258	790100	435175	832433	982891	1.04575e+06	1.11802e+06	812258	1.25055e+06	1271544	1.19929e+06	931935	987207	828899	1.05765e+06
342.289	7.11988		0		0.4			-2.34713	#N/A		nFla'nFlaB'UIB	5-oxo-6E,8Z,11Z,14Z-eicosatetraenoic acid-d7	0	bp				1.09	1.09	1261158	pos734	0		NH3	pos	21	641649	401952	243440	550503	1.09563e+06	452945	361345	646396	443181	409501	244636	0	0	542586	244351	371968	0	567596	616203	707516	1261158	313397	654937
485.859	27.0719										nFla'nFlaB'PQC'UI		0	bp				0.07	0.89	1260292	pos735	0			pos	24	341145	292205	335597	470420	318132	303176	287590	294813	366054	355752	361198	339363	332406	319193	297670	340875	311476	337162	1.06728e+06	327740	300662	294489	1.26029e+06
167.116	6.36399										nFla'nFlaB'PQC'UI'UIB		0	bp				0.08	0.3	1256948	pos737	0			pos	24	671522	940405	643653	1.23804e+06	1.1907e+06	762145	970355	1.14806e+06	832888	762223	528705	642111	563160	553590	544806	894496	979374	914863	1.25695e+06	700056	470019	950689	1.09255e+06
167.116	7.02986										nFla'nFlaB'PQC'UI'UIB		0	bp				0.21	0.26	1256948	pos738	0			pos	24	948935	940405	984396	738374	780573	833006	968367	1.14806e+06	687933	762223	718974	639795	603026	394257	701991	753078	896673	746814	1.25695e+06	1.01561e+06	740624	873196	800966
280.24	4.08965		0		0.2			-0.457523	#N/A	-0.534576	nFla'nFlaB'PQC'UI'UIB	FA (18:2)	0	bp				0.08	0.42	1256802	neg250	0		H	neg	24	630357	436029	501792	655994	510057	599484	751242	806701	1.2568e+06	464838	415472	445540	478806	391610	426928	832830	295985	454503	578146	764131	748535	706432	996021
368.365	3.50662	C24H48O2	15	Tetracosanoic acid	8	Central	KEGG_Metacyc_Lipidmaps_HMDB	-0.270391	5.16916	-0.299674	nFla'nFlaB'PQC'UI	Tetracosanoic acid	0	bp				0.12	0.83	1249025	neg252	0		H	neg	24	342347	369354	374328	365106	480824	254602	333893	396815	281192	298561	326765	364765	402503	322884	299831	285168	296766	292971	321684	319090	1.24902e+06	342042	284726
677.774	16.0647										nFla'nFlaB'PQC'UI'UIB		0	bp				0.27	0.36	1245183	pos739	0			pos	24	844201	985905	1.13389e+06	1.16939e+06	880529	755193	383557	998728	925332	860165	542343	1.02997e+06	1071985	898331	1.24149e+06	464280	897348	1245183	984779	920066	740140	781271	1.19058e+06
167.116	6.02843				0.2						nFla'nFlaB'PQC'UI'UIB		0	bp	xNH3			0.11	0.28	1238041	pos631	0			pos	24	671522	1.03119e+06	715217	1.23804e+06	1.1907e+06	1.03678e+06	1.00185e+06	901338	852335	1.10148e+06	539011	642111	563160	521890	475247	751437	1.11203e+06	777117	1.16602e+06	1072157	485476	1.00037e+06	1.09255e+06
823.09	15.4084				0.1						nFla'nFlaB'PQC'UI'UIB		0	bp	xC13			0.18	0.31	1234759	pos630	0			pos	24	689361	697255	1.22504e+06	870200	940119	883734	783231	671508	1.14804e+06	856042	776986	975919	858447	1.20473e+06	1.14629e+06	733302	548391	1.01019e+06	1.04883e+06	818943	836440	585085	1.23476e+06
340.017	14.7929		0		0.1			-1.24302	#N/A		nFla'nFlaB'UI'UIB	3-Deoxy-D-manno-octulosonate 8-phosphate	0	bp	xK+		xK+	0.56	0.56	1221066	pos740	0		Na	pos	23	962360	768974	760600	738333	935765	1.22107e+06	1.07675e+06	892690	649620	1.00234e+06	0	842386	796000	786724	728280	798804	966300	971364	645102	663718	997050	1.16341e+06	664819
240.067	3.48964		0		#N/A			1.59518	#N/A		nFla'nFlaB'PQC'UI'UIB	L-Tryptophan	0	bp				0.6	0.6	1211076	neg253	0		Cl	neg	24	364075	434883	141230	211377	235887	333096	259350	296540	242836	286881	328738	324295	512426	710598	1.21108e+06	210809	237530	203194	467514	302019	355001	252479	535084
119.058	14.2044	C4H9NO3	10	L-Threonine	10	Central	KEGG_Metacyc_HMDB	0.212289	1.41507	0.387046	nFla'nFlaB'PQC'UI'UIB	L-Threonine	0	bp				0.31	0.31	1207855	neg221	0		H	neg	24	592403	710988	482792	635338	809444	501396	339162	715204	741883	612720	1.20785e+06	898996	725392	872162	500305	802067	778725	827142	1.11578e+06	814374	731650	399412	695176
559.072	14.7202	C15H23N5O14P2	3	ADP-ribose	10	Central	KEGG_Metacyc_HMDB	0.593233	0.160024		nFla'nFlaB'PQC'UI'UIB	ADP-ribose	0	bp				0.36	0.45	1207213	pos576	0		H	pos	24	452295	491232	452744	404049	511543	331260	345636	680623	439778	441623	1.20721e+06	756408	649335	664103	488182	545823	635199	657081	704813	581426	900238	389065	354762
548.504	15.4024										nFla'nFlaB'PQC'UI'UIB		0	bp				0.28	0.41	1204934	pos741	0			pos	24	768076	571607	666839	469328	670425	423364	554993	732552	1.20493e+06	666203	411444	664453	506424	846359	562791	650401	535250	867817	578301	728724	811953	618425	862542
300.145	19.5931		0		#N/A			1.60884	#N/A		nFla'nFlaB'PQC'UI'UIB	Ile-Phe	0	bp		-2.8	x2+xC13	0.08	0.16	1204394	pos742	0		Na	pos	24	919794	822397	864757	731284	1.04454e+06	948405	840928	840684	857125	1.06416e+06	1.19543e+06	1.10305e+06	1.07376e+06	1.01445e+06	963984	851437	1204394	1.15487e+06	932517	709163	976099	956727	799658
245.066	14.2968							5.64644			nFla'nFlaB'PQC'UI'UIB		0	bp				0.1	0.29	1200701	neg254	0			neg	24	458347	394020	413352	323774	513189	1.2007e+06	723751	954988	912031	1.16461e+06	699741	726178	654122	661189	549210	562569	736607	942405	505553	800298	1.09403e+06	1.02017e+06	612775
563.44	19.9826										nFla'nFlaB'PQC'UI'UIB		0	bp				0.2	0.27	1200696	pos743	0			pos	24	750725	1.08007e+06	832805	952958	880686	640340	682606	826139	752419	666238	745874	777146	924747	912578	1.2007e+06	579787	1.12666e+06	811490	1.00902e+06	939652	823498	423638	702908
249.111	27.4761		0		0.1			-0.826514	#N/A		nFla'nFlaB'PQC'UI'UIB	Nalidixic acid	0	bp	xNa+		xNa+	0.66	0.66	1199939	pos744	0		NH3	pos	24	841243	722625	444545	483433	420794	593790	623962	315004	191206	625227	258356	195948	328107	941779	655989	372185	391591	583154	959640	1.19994e+06	629785	246012	321955
220.07	15.7833		0		#N/A			0.261607	#N/A		nFla'nFlaB'PQC'UI'UIB	L-beta-aspartyl-L-serine	0	bp				0.17	0.2	1199895	pos729	0		H	pos	24	674569	756893	865748	756414	705891	719922	829397	734132	748398	743267	1.13515e+06	852514	736715	814162	829369	757079	867974	914003	1.1999e+06	700726	882303	899923	983280
961.033	7.19286				0.1						nFla'nFlaB'PQC'UI'UIB		0	bp	xC13			0.28	0.28	1198614	neg256	0			neg	24	691763	609188	607294	829955	803528	754588	760621	710909	663131	782244	1.19861e+06	642121	744455	776234	678714	991529	712732	743244	659902	786784	842475	736362	889129
440.104	16.7194	C14H24N4O8S2	2	Asp-Thr-Cys-Cys	7	0	Peptides	0.400359	4.30307		nFla'nFlaB'PQC'UI'UIB	Asp-Thr-Cys-Cys	0	bp				0.14	0.25	1196723	pos613	0		H	posneg	24	450708	384968	586654	406984	460627	521309	577051	640578	632956	719275	978992	826659	764448	704299	728941	979176	1196723	855713	996188	568376	674262	344549	720972
278.04	13.8702										nFla'nFlaB'UI'UIB		0	bp				0.61	0.61	1188695	pos745	0			pos	23	1.18869e+06	1.02202e+06	1.02218e+06	963575	841472	1.012e+06	617040	827463	947487	758330	0	925332	1.1541e+06	822631	655361	1.05805e+06	965764	1.07866e+06	987288	932484	997165	1.18559e+06	919343
170.178	11.9578				0.2						nFla'nFlaB'PQC'UI'UIB		0	bp				0.05	0.14	1188484	pos746	0			pospos	24	1.18848e+06	1.03853e+06	948031	1.02837e+06	944638	1.02292e+06	1.05486e+06	980740	776154	979676	899547	909026	921691	875896	994841	1.14356e+06	1.06008e+06	1.05692e+06	814302	1.15132e+06	1.05612e+06	1.09804e+06	1.0281e+06
1046.33	16.7104				0.1						nFla'nFlaB'UI'UIB		0	bp	xK+	C45	x2+xC13	0.59	0.59	1187224	pos748	0			pos	23	1.0155e+06	1.08473e+06	894047	862720	1.11548e+06	1.15353e+06	872156	1.12803e+06	962692	1.18722e+06	0	778554	1100335	1.10705e+06	874929	965546	940387	1.08503e+06	914454	1.00257e+06	1.17162e+06	1.06985e+06	1.01814e+06
645.477	16.0241							5.44922			nFla'nFlaB'PQC'UI'UIB		0	bp				0.38	0.38	1185835	pos736	0			pos	24	677927	608070	728624	573480	637980	662163	316592	679661	500841	609841	393690	744127	791942	646352	1.18583e+06	443736	705023	843139	955937	647485	551650	549466	753732
116.084	4.77773	C6H12O2	24	Hexanoic acid	9	0	KEGG_Metacyc_Lipidmaps_HMDB	0.0669295	-0.365666	0.153677	nFla'nFlaB'PQC'UI'UIB	Hexanoic acid	0	bp				0.08	0.27	1181800	neg257	0		H	neg	24	1.1818e+06	1.12284e+06	807349	670059	690285	897201	662676	757209	893837	699444	776342	834871	850772	949824	808521	707180	1.16429e+06	727622	788855	796205	618496	751896	712849
622.186	16.3895		0		#N/A			-1.90498	#N/A		nFla'nFlaB'PQC'UI'UIB	Loganin pentaacetate	0	bp		32	xC13	0.24	0.35	1181687	pos749	0		Na	pos	24	375127	1.12709e+06	936419	753489	779902	656844	545855	602293	861322	786552	386627	765198	736035	699046	792015	687468	741954	704655	1181687	660738	681818	637614	729516
486.206	21.0266	C18H34N2O13	1	Glucosylgalactosylhydroxylysine	7	0	HMDB	0.692776	0	-2.06325	nFla'nFlaB'PQC'UI'UIB	Glucosylgalactosylhydroxylysine	0	bp		3	xNa+xC13	0.12	0.28	1181563	pos750	0		H	posneg	24	905714	649585	788412	732437	1.02927e+06	665182	583972	658701	765698	840081	1.18156e+06	954112	1.01835e+06	994489	861464	591549	1.05961e+06	823722	1.15524e+06	678314	910944	648616	942918
313.662	13.6902										nFla'nFlaB'PQC'UI'UIB		0	bp				0.22	0.38	1181029	pos751	0			pos	24	638441	757359	990965	477471	828341	722690	295050	994499	959321	987546	933657	527530	766534	954123	710268	1.18103e+06	1.15428e+06	1.11367e+06	1.17044e+06	1.02813e+06	823211	1.05741e+06	695444
309.927	6.46905				0.4						nFla'UI'UIB		0	bp				1.21	1.21	1180463	pos752	0			pos	23	705832	511155	892542	618760	218840	437869	1.18046e+06	169404	446810	174628	0	363801	182014	133126	1063918	405911	524611	391474	137820	332371	132687	867372	682915
800.97	7.18052										nFla'nFlaB'PQC'UI'UIB		0	bp		C33	xC13xC13	0.2	0.2	1174249	neg259	0			neg	24	705692	621414	651888	873683	767010	863259	822184	736733	596492	776189	928533	671173	820500	1.17425e+06	962609	665954	862047	661383	647202	877456	753326	739836	708662
810.663	27.7847		0		#N/A			1.3116	#N/A		nFla'nFlaB'PQC'UI'UIB	SM(d42:3)	0	bp				0.09	0.41	1171637	pos753	0		H	pos	24	454219	740955	700259	399146	979536	512178	327655	450326	372069	418097	958737	945103	1.04736e+06	1.11755e+06	1171637	353517	447277	892160	577813	413828	429574	457688	342465
368.117	21.265				0.1						nFla'nFlaB'PQC'UI'UIB		0	bp	xNa+		xNa+	0.11	0.19	1169139	pos754	0			pos	24	967946	936732	1.0472e+06	944920	1.05413e+06	1.02717e+06	673217	984613	1.07817e+06	1.16914e+06	1062019	1.04641e+06	1.11484e+06	1.14218e+06	854573	800698	1.08002e+06	1.09204e+06	1.00945e+06	959492	1.03622e+06	990984	1.03926e+06
117.936	0.0424467		0		#N/A			-0.0169809	#N/A		nFla'nFlaB'PQC'UI'UIB	chromate	0	bp				0.32	0.32	1166334	neg258	0		H	neg	24	588251	584253	534260	691977	893371	609816	493928	877215	730862	965833	1166334	934497	976577	848428	408635	836685	752463	782341	774566	595498	704207	675716	685677
165.046	7.17993		0		#N/A			1.02619	#N/A	1.44799	nFlaB'PQC	L-Methionine S-oxide	0	bp				0.14	0.85	1164237	neg260	0		H	neg	22	316231	282517	0	695170	226134	461872	768181	694393	515353	310873	223051	284750	214250	207901	208818	198677	133307	0	139963	1.16424e+06	170882	444070	280322
304.24	3.58289	C20H32O2	46	FA (20:4)	8	Central	KEGG_Metacyc_Lipidmaps_HMDB	0.398525	-1.48962		nFla'nFlaB'PQC'UI'UIB	FA (20:4)	0	bp				0.09	0.19	1163256	neg248	0		H	neg	24	883647	1.16326e+06	1.09665e+06	724197	1.11061e+06	1.08447e+06	840169	842798	890211	935324	1.14956e+06	1.12375e+06	952071	1.08657e+06	941288	709698	957071	920833	891442	721331	685553	807785	889728
557.333	4.24079		0		#N/A			1.1969	#N/A	0.684633	nFla'nFlaB'PQC'UI'UIB	Lys-Lys-Trp-Pro	0	bp		-2.2	xC13	0.45	0.45	1160530	neg261	0		H	neg	24	381530	400202	447385	371615	472664	465868	342687	484270	482027	605772	1.16053e+06	561826	561074	621392	372353	503082	476365	465762	611100	499470	625932	427860	538090
229.151	9.15011				0.1						nFla'nFlaB'PQC'UI'UIB		0	bp	xC13			0.17	0.18	1160317	pos755	0			pos	24	734766	807047	751854	777473	769945	813385	621937	864542	1.03359e+06	850192	1.08096e+06	770400	889925	1.16032e+06	860008	849945	743792	1.00385e+06	1.0021e+06	1.00252e+06	900096	896086	1.01176e+06
415.33	7.12951		0		0.4			-0.0312296	#N/A		nFla'nFlaB	3-Hydroxyhexadecanoylcarnitine	0	bp				1.4	2	1147407	pos758	0		H	pos	17	716626	716043	927814	974143	790949	1.08195e+06	744620	840746	1.14741e+06	806949	0	0	0	451423	640561	464707	0	0	0	387787	337435	450936	178304
814.48	7.18052		0		0.1			1.32801	#N/A	1.41141	nFla'nFlaB'PQC'UI'UIB	PG(18:4(6Z,9Z,12Z,15Z)/22:6(4Z,7Z,10Z,13Z,16Z,19Z))	0	bp	xC13			0.16	0.16	1145770	neg263	0		H	neg	24	782795	879310	1.08609e+06	850881	920448	949968	851184	827716	764299	922820	1.14577e+06	839861	768170	1.05183e+06	932473	821381	875298	815707	923083	900414	807958	762372	862644
181.023	7.17929										nFla'nFlaB'PQC'UI'UIB		0	bp				0.19	0.62	1145395	neg264	0			neg	24	303024	294777	132433	441623	282918	199145	590910	793145	1145395	329650	465619	555080	390046	347895	380591	761864	291947	419583	663839	855972	384808	859414	802354
97.9768	27.7341		0		0.2			-1.22018	#N/A		nFla'nFlaB'PQC'UI'UIB	Orthophosphate	0	bp				0.23	0.47	1144544	pos759	0		H	pos	24	628676	678705	220722	296286	751543	678315	717767	818888	683311	717387	687167	712073	1.14454e+06	777956	728230	760987	726517	673416	968355	680552	769647	625372	743975
483.261	4.46594	C47H84O16P2	19	PIP(38:4)	8	Central	KEGG_HMDB	-1.16752	10.4333	2.99173	nFla'nFlaB'PQC'UI'UIB	PIP(38:4)	0	bp				0.19	0.49	1144034	neg265	0		2-charge	neg	24	629038	656943	711837	930111	671301	865391	719361	811587	830431	705586	150377	241118	253276	241497	205786	1.08076e+06	325289	602185	568727	1.14403e+06	847974	951128	758516
898.713	9.24337										nFla'nFlaB'UI'UIB		0	bp				0.74	0.74	1142266	neg266	0			neg	23	794286	749965	975161	671376	490646	490838	1.14227e+06	415174	708300	384089	0	445388	443246	383378	902733	563299	511171	479470	363852	620162	384785	650533	741347
131.058	13.9512	C5H9NO3	14	5-Aminolevulinate	10	Central	KEGG_Metacyc_Lipidmaps_HMDB	1.47594	4.0632	2.30955	nFla'nFlaB'PQC'UI'UIB	5-Aminolevulinate	0	bp			xFAxCl	0.21	0.21	1141899	neg267	0		H	neg	24	917254	922768	919899	871489	964057	820916	601366	670925	820575	781582	1.1419e+06	909463	859338	806293	634694	784130	907619	1.06423e+06	690752	596874	629606	556656	477571
363.196	18.1718										nFla'nFlaB'PQC'UI'UIB		0	bp				0.08	0.32	1136518	pos760	0			pos	24	1136518	718245	863551	594007	982218	956209	822688	690194	661932	920242	828139	788974	828143	845141	692983	682793	1.01916e+06	1.01725e+06	506979	711322	890970	967000	458796
167.062	12.7148		0		#N/A			1.92672	#N/A		nFla'nFlaB'PQC'UI'UIB	2-hydroxy-4-methylthiobutanoate	0	bp				0.28	0.28	1135615	pos761	0		NH3	pos	24	625759	534715	503484	599266	870761	743150	641154	839256	717348	860966	1135615	744608	940354	703511	549676	891578	824943	795306	821083	708884	702387	796820	696524
218.09	15.0388		0		0.4			0.0258974	#N/A	0.0502541	nFla'nFlaB'UI'UIB	gamma-L-Glutamyl-D-alanine	0	bp				0.97	0.97	1133558	neg268	0		H	neg	24	173260	172174	242155	269677	209066	257478	193031	251195	200922	217391	1.13356e+06	253573	207018	239730	238164	300797	311271	387313	835533	185441	231810	287440	605801
521.591	7.11637	C36H72	1	(21-Methyl-8Z-pentatriacontene	7	0	Lipidmaps	1.20554	43.7915		nFla'nFlaB'PQC'UI'UIB	(21-Methyl-8Z-pentatriacontene	0	bp				0.36	0.36	1133528	pos762	0		NH3	pos	24	888691	516327	531378	429525	687774	538460	604469	940013	843409	356568	195785	657437	536168	615056	631816	629122	465195	469722	655550	1.13353e+06	651168	444979	694191
362.109	21.2636				0.1			5.85219			nFla'nFlaB'PQC'UI'UIB		0	bp	xK+	C15	xC13	0.22	0.31	1131070	pos763	0			pos	24	1.02787e+06	828845	1.02747e+06	762921	1.00747e+06	742720	694167	667380	882038	1.12362e+06	601862	936181	1.12733e+06	1.03016e+06	1051772	533395	1.13107e+06	841149	1.08363e+06	639270	972527	784665	901348
219.111	8.43222		0		0.4			0.199033	#N/A	0.26926	nFla'nFlaB'UI'UIB	Pantothenate	0	bp				0.85	0.85	1129826	neg235	0		H	neg	24	190097	219452	243790	241587	235359	285858	198596	229124	340525	277800	1.12983e+06	295648	284888	313232	220267	291304	255546	339146	367585	308574	306345	255825	339689
262.08	17.7563	C9H14N2O7	2	L-beta-aspartyl-L-glutamicacid	7	0	HMDB	-0.266006	-47.4014	-0.308758	nFla'nFlaB'PQC'UI'UIB	L-beta-aspartyl-L-glutamicacid	0	bp		0.8	xC13	0.1	0.27	1128947	neg269	0		H	neg	24	664540	543732	614880	410521	757009	576658	512444	608308	406030	696621	928016	855111	833840	830039	700398	635454	1.0083e+06	1.12895e+06	721947	362048	647866	482748	483889
830.625	7.16877				0.1						nFla'nFlaB'UI'UIB		0	bp	xNa+			0.67	0.67	1126996	pos764	0			pos	23	788543	951338	1.12236e+06	734352	654188	547855	673904	677552	889081	533168	0	667391	594693	603594	1.127e+06	615086	825730	853179	1.1262e+06	656199	733989	720837	771081
729.567	27.8842		0		#N/A			-0.0438773	#N/A	-0.0407155	nFla'nFlaB'PQC'UI'UIB	PE(P-36:1)	0	bp				0.04	0.41	1116011	pos765	0		H	pos	24	461892	941289	721232	307451	849498	392079	452308	628169	412889	645359	1.00695e+06	1.00684e+06	1.11601e+06	1.02416e+06	1052913	312230	959978	782888	613238	376490	575594	527720	354049
167.982	17.9713	C3H5O6P	3	Phosphoenolpyruvate	10	Central	KEGG_Metacyc_HMDB	-1.13403	0.324958		nFla'nFlaB'PQC	Phosphoenolpyruvate	0	bp				0.09	0.57	1114850	pos766	0		H	posneg	20	487112	973318	730758	210324	1.11485e+06	155241	445675	420368	114743	424929	490992	480374	443699	401718	513597	0	0	0	158736	161597	166267	151435	182683
843.566	3.67979										nFla'nFlaB'PQC'UI'UIB		0	bp				0.25	0.4	1101919	neg272	0			neg	24	201613	724909	618413	665030	834166	801801	596329	600191	723928	807900	1.10192e+06	753128	747656	891697	562958	751884	777858	814182	853085	686631	711894	682071	757746
789.237	16.0399										nFla'nFlaB'PQC'UI'UIB		0	bp				0.24	0.36	1101387	pos767	0			pos	24	478297	711506	826057	896943	662672	471359	519627	778363	1.10139e+06	626504	442694	914451	761582	812010	796158	524891	667785	545541	699139	703307	552423	716517	744815
303.99	15.2837										nFla'nFlaB'PQC'UI'UIB		0	bp				0.55	0.55	1099584	neg273	0			neg	24	167709	175743	305648	360055	217604	417165	295533	297200	693773	353718	9829.62	520257	438729	453166	495488	289323	378007	478864	881530	523103	524255	419083	1.09958e+06
352.864	15.49										nFla'nFlaB'UI'UIB		0	bp				0.59	0.67	1099517	pos768	0			pos	23	777598	377461	287790	225534	594072	587115	453937	566925	278200	955910	0	658590	614304	610635	445519	267272	789740	689682	303319	265924	1.09952e+06	675696	222268
284.113	14.631	C14H18N2O3	4	Phe-Pro	7	0	Peptides_HMDB	-2.56655	41.6732		nFla'nFlaB'PQC'UI'UIB	Phe-Pro	0	bp				0.4	0.4	1097460	pos769	0		Na	pos	24	596547	407503	486149	286126	722312	878469	309198	703661	581242	900938	1.09746e+06	937695	503565	639612	412998	649357	785818	974156	368578	489887	836879	457199	377418
701.853	9.73099										nFla'nFlaB'UI'UIB		0	bp				0.57	0.57	1096235	neg274	0			neg	23	774540	786452	1.09624e+06	908721	575665	720371	1.05747e+06	650614	778999	557930	0	659244	590150	609533	762416	637782	727721	787169	597914	676118	608289	785763	716850
318.065	15.88	C18H10N2O4	2	Prekinamycin	7	0	KEGG	2.63574	47.3113		nFla'nFlaB'PQC'UI'UIB	Prekinamycin	0	bp		-8.2	x2+xC13	0.12	0.22	1094485	neg275	0		H	neg	24	630336	785529	1.00436e+06	920230	793137	761141	687905	708502	1.09449e+06	695425	947429	784521	736246	700112	782839	756791	641430	868888	921843	807979	539954	684837	951012
145.983	30.0417										nFla'nFlaB'PQC'UI'UIB		0	bp				0.07	0.42	1086269	neg270	0			neg	24	442541	555344	603600	835972	507852	449661	552817	531902	732829	478133	719520	677777	612151	620487	617008	656979	511923	475691	1.05473e+06	708238	430398	430867	1.08627e+06
105.043	15.4295	C3H7NO3	4	L-Serine	10	Central	KEGG_Metacyc_HMDB	0.150426	0.231619	0.318464	nFla'nFlaB'PQC'UI'UIB	L-Serine	0	bp				0.19	0.32	1082438	neg276	0		H	neg	24	436011	443937	366807	406856	538456	380319	378597	430758	345268	476804	320029	493535	554954	506646	449303	769670	851100	959413	676616	560998	1.08244e+06	686290	500701
191.032	13.4591		0		0.1			0.380081	#N/A		nFla'nFlaB'PQC'UI'UIB	Phosphodimethylethanolamine	0	bp	xNa+			0.4	0.4	1081878	pos771	0		Na	pos	24	668884	471188	460749	375741	533168	867001	439714	838721	823350	905884	335937	1.00837e+06	735125	698951	457317	848746	1.03154e+06	1.08188e+06	628007	966654	976664	960495	384476
646.041	15.0834				0.1						nFla'nFlaB'UI'UIB		0	bp	xK+			0.56	0.56	1079114	pos772	0			pos	23	880941	955449	858525	830090	1.07911e+06	646968	702246	808483	812409	825337	0	825479	787132	792672	743044	685113	649474	627288	563503	679912	582100	691561	557224
647.622	7.27785	C42H81NO3	1	[SP (24:0)] N-(15Z-tetracosenoyl)-sphing-4-enine	7	0	KEGG_Lipidmaps_HMDB	0.297459	45.0387		nFla'nFlaB'PQC'UI'UIB	[SP (24:0)] N-(15Z-tetracosenoyl)-sphing-4-enine	0	bp		1	xC13	0.09	0.45	1074901	neg277	0		H	neg	24	634726	992526	962626	329107	1.0506e+06	590645	384448	643864	885714	790158	811608	1.02897e+06	941804	903372	841534	290700	1.0735e+06	1.0749e+06	895213	626072	533583	439989	991664
725.534	3.79346				0.2			-3.25635			nFla'nFlaB'PQC'UI'UIB		0	bp				0.19	0.19	1072770	neg278	0			neg	24	772336	866691	973247	905617	903068	751636	825048	720204	964896	758698	473857	792036	776321	634618	713160	1.07277e+06	971354	944589	771320	744510	708011	600089	819987
348.047	15.3084	C10H13N4O8P	3	IMP	10	Central	KEGG_Metacyc_HMDB	0.222376	0.216288		nFla'nFlaB'PQC'UI	IMP	0	bp			xK+	0.43	0.43	1072046	pos773	0		H	pos	23	659795	942474	1.07205e+06	876392	861769	379114	364572	420608	453951	389573	917095	391504	405975	435286	443299	76133.8	81249.4	147966	141441	75820.7	88697.3	78041	104263
181.074	12.5441	C9H11NO3	11	L-Tyrosine	10	Central	KEGG_Metacyc_HMDB	0.214048	0.13013	0.309165	nFla'nFlaB'PQC'UI'UIB	L-Tyrosine	0	bp		0.7	xC13	0.05	0.19	1066628	neg271	0		H	neg	24	546322	657665	686835	622817	695231	489927	444011	563019	727643	574631	841002	837046	766179	805427	741735	803526	931380	985024	1.06663e+06	639308	751802	546136	843594
464.044	16.8373				0.1						nFla'nFlaB'PQC'UI'UIB		0	bp	xK+	C20	xC13	0.55	0.55	1065539	pos774	0			pos	24	553357	494067	408831	461521	545492	735622	775485	938956	717077	708873	38436.5	593027	770526	656556	525998	1.06554e+06	737998	868651	795888	787121	701373	665476	730166
301.299	10.9419		0		#N/A			1.61656	#N/A	1.72394	nFla'nFlaB'PQC'UI'UIB	Sphinganine	0	bp				0.1	0.24	1055321	pos775	0		H	pos	24	533832	619012	702332	644176	752701	681978	342131	614930	628126	682065	1.05532e+06	928046	839852	1.01667e+06	843449	869948	677016	608472	738121	730678	839180	642589	764231
593.804	15.7823										nFla'nFlaB'PQC'UI'UIB		0	bp				0.3	0.3	1055083	pos756	0			pos	24	573177	720883	805107	680995	786742	535691	486399	862915	721393	505350	375322	961118	720701	801650	754377	561309	743402	830845	1.05508e+06	612186	571398	718424	1.01946e+06
192.074	13.4647		0		#N/A			-0.918787	#N/A	-0.991018	nFla'nFlaB'PQC'UI'UIB	Ser-Ser	0	bp				0.34	0.41	1053926	pos776	0		H	posneg	24	498754	473843	356344	264227	707484	500871	341681	553899	220950	718987	1.05393e+06	695485	469210	627177	538846	522832	671818	718494	646555	387611	728163	662746	297417
153.994	17.0795	C3H6O5S	1	3-sulfopropanoate	7	0	Metacyc	0.151237	35.9148		nFlaB'PQC'UI'UIB	3-sulfopropanoate	0	bp				0.29	1.14	1050921	neg281	0		H	neg	24	197338	193628	187125	109028	1.05092e+06	83180.9	221942	167807	126734	196651	375401	257494	219300	235113	184539	127903	181097	149088	112591	125717	139437	107728	96322.4
235.991	18.7372		0		0.1			-0.229684	#N/A		nFla'nFlaB'PQC'UI'UIB	Fenpiclonil	0	bp	xNa+		xNa+	0.04	0.22	1040349	pos777	0		H	pos	24	599033	659079	616792	441878	585488	852332	739828	801383	657620	709363	708656	736501	700292	667931	714068	819505	954497	1.04035e+06	610613	752621	781977	1.01536e+06	665049
368.909	15.2527										nFla'nFlaB		0	bp			xCl37xK+	0.56	0.56	1039057	pos778	0			pos	14	494667	816544	910319	1.03906e+06	743071	639818	479794	563813	1.03391e+06	434540	0	450046	478266	457516	455571	0	0	0	0	0	0	0	0
744.079	16.5769				0.1						nFla'nFlaB'PQC'UI'UIB		0	bp	xC13		x2+	0.07	0.25	1035890	pos732	0			pos	24	936726	799195	836587	792152	883533	638365	707058	660436	708920	808095	989570	1.03589e+06	869241	915359	942816	545084	851810	610862	924182	620864	760581	516788	764184
111.08	28.358	C5H9N3	1	1H-Imidazole-4-ethanamine	8	Central	KEGG_Metacyc_HMDB	-0.383672	39.2616	-0.421231	nFla'nFlaB'PQC'UI'UIB	1H-Imidazole-4-ethanamine	0	bp			x-NH3	0.07	0.09	1026210	pos779	0		H	pos	24	891450	796573	954953	891377	776926	858179	884633	780701	898092	770477	1.00853e+06	926489	853060	910787	861620	956269	851016	914778	1.02621e+06	933714	841227	831368	974996
116.059	14.6822		0		#N/A			0.124776	#N/A	0.176521	nFla'nFlaB'PQC'UI'UIB	Diacetylhydrazine	0	bp				0.24	0.27	1025654	pos780	0		H	pos	24	591328	343845	466085	434298	524039	762760	538037	570210	626618	611202	852693	578246	906737	588178	564168	683913	657804	1.02565e+06	574758	754866	668527	735974	506487
171.126	4.63061		0		#N/A			-0.11702	#N/A	-0.110482	nFla'nFlaB'PQC'UI'UIB	Gabapentin	0	bp				0.46	0.46	1023876	pos781	0		H	pos	24	529444	600664	452684	875460	411543	429400	367242	751598	865263	798827	1.02388e+06	961806	375905	848491	343513	961096	768455	424585	426751	822311	683449	400764	430236
205.921	12.6148				0.4						UI'UIB		0	bp				1.78	1.78	1022474	neg282	0			neg	23	181918	133876	604353	176456	69768	89978.8	627221	70200.6	88131.9	64430.8	0	61030.9	73117.6	66160.4	1.02247e+06	77329.1	112116	67579.9	61281.8	64274.6	61829.4	199626	153293
205.002	14.0563				0.4						nFla'nFlaB'UI'UIB		0	bp			xCl37	0.83	0.83	1021848	neg283	0			neg	23	428193	458937	1.02185e+06	642437	396833	436379	775127	308112	503108	341067	0	311616	493887	362816	984788	321416	516558	418810	354225	249993	197376	565058	548200
404.193	6.93585							4.45501			nFla'nFlaB'UI'UIB		0	bp				0.63	0.63	1019939	pos782	0			pos	23	849848	636787	719111	693911	793508	746313	784872	725068	966388	736556	0	800251	421983	788248	818336	826310	428836	1.01994e+06	676919	775640	852401	797361	866303
420.321	27.6149		0		0.1			0.404746	#N/A	-2.54024	nFla'nFlaB'PQC'UI'UIB		8.06189	bp	xNa+			0.11	0.33	1018401	pos770	0		H	pos	24	497779	563514	677762	813820	522419	474132	569460	666617	684570	681975	838715	643464	760810	687860	682377	728849	540472	519359	1.0184e+06	707446	438932	507298	929750
783.659	7.27541	C46H89NO8	5	Glucosylceramide (d18:1/22:0)	7	0	KEGG_HMDB	0.769392	45.0203		nFla'nFlaB'PQC'UI'UIB	Glucosylceramide (d18:1/22:0)	0	bp		5.5	xC13	0.25	0.25	1014155	neg284	0		H	neg	24	897022	798449	930666	637821	851321	716097	634198	666655	873346	799546	485540	989543	849427	832430	1014155	524137	935744	899045	810878	755020	613252	736169	833064
126.025	14.4632										nFla'nFlaB'PQC'UI'UIB		0	bp				0.26	0.42	1012422	pos783	0			pos	24	829220	785446	656452	710161	920036	810717	427459	744359	580819	1.01242e+06	944879	898937	639525	711667	479732	842602	943604	803223	401898	497638	912504	846562	270554
88.1001	15.2475		0		#N/A			0.502214	#N/A	0.664735	nFlaB'UIB	Putrescine	0	bp				0.8	1.16	1005693	pos784	0		H	pos	20	419346	577667	797220	678364	0	574894	65538.8	563421	538881	442949	0	85372.1	517620	487784	472419	0	0	570009	686573	1.00569e+06	565400	444055	521818
166.048	13.3363	C5H10O6	8	D-Arabinonate	8	Central	KEGG_Metacyc_HMDB	-0.150309	-24.0914	-0.182923	nFla'nFlaB'PQC'UI'UIB	D-Arabinonate	0	bp				0.23	0.29	1003897	neg285	0		H	neg	24	647130	594317	619643	382846	739343	876603	635026	801001	501150	834602	771267	904408	839310	501183	621676	759548	822044	1.0039e+06	475778	497136	748912	788373	545396
614.147	15.0952	C20H31N4O16P	1	CMP-N-acetylneuraminate	8	Central	KEGG_Metacyc_HMDB	-0.242081	0	-2.08693	nFla'nFlaB'PQC'UI'UIB	CMP-N-acetylneuraminate	0	bp		4.9	xC13	0.36	0.36	996534	neg139	0		H	neg	24	495536	553505	674896	511506	590180	531708	477684	452192	665950	493451	996534	528795	477608	508940	542972	395731	429735	442753	781785	527866	497166	536288	968025
234.627	14.5994										nFla'nFlaB'PQC'UI'UIB		0	bp				0.24	0.46	994632	pos785	0			pos	24	548998	439863	435400	421276	432331	488190	495953	522439	402722	654813	620102	482561	434591	751704	481638	400656	678854	994632	391781	565949	635491	472891	378780
303.205	4.90126										nFlaB'PQC		0	bp				0.3	1.18	993415	pos786	0			pos	18	548782	299957	312540	0	0	801430	335548	308904	616368	575612	421409	922870	746045	675277	993415	0	330238	252265	0	0	562835	609209	241374
176.08	12.7228	C6H12N2O4	4	Ala-Ser	7	0	Metacyc_Peptides	-0.0331303	-38.4746	-0.0178153	nFla'nFlaB'PQC'UI'UIB	Ala-Ser	0	bp				0.34	0.4	990855	pos787	0		H	posnegpos	24	492858	505050	371722	443745	653384	507444	338503	590246	183735	590513	944421	630340	676491	649464	332601	632725	918081	990855	488279	502407	585596	493480	365762
380.11	12.6786		0		0.1			0.471625	#N/A		nFlaB'PQC'UI	202-791	0	bp	xK+			0.59	1	988349	pos789	0		Na	pos	24	58816.9	302745	163030	374433	988349	295351	78630.1	397633	481461	627782	338224	728045	764981	738244	69833.1	588176	565178	756568	680043	196844	220639	71589.7	825896
758.63	13.1543		0		#N/A			0.3977	#N/A		nFla'nFlaB'PQC'UI'UIB	SM(d38:1)	0	bp				0.19	0.25	981993	pos790	0		H	pos	24	362061	512221	509353	609060	696738	350047	247989	287512	340138	474992	981993	764486	641317	734495	613050	375589	579968	606119	410573	429894	370663	403252	512055
714.804	20.549										nFla'nFlaB'PQC'UI'UIB		0	bp				0.09	0.24	980931	pos791	0			pos	24	436729	560362	569272	681680	611744	937513	545972	599208	833575	614451	668100	816220	763279	659884	729166	475041	502461	678273	782794	753812	980931	511285	812189
303.541	15.0996		0		0.1			-0.267569	#N/A		nFla'nFlaB'PQC'UI'UIB	UDP-N-acetyl-D-galactosamine	0	bp	x2+	6.8	xC13	0.03	0.41	979822	neg287	0		2-charge	neg	24	832784	941924	970260	506618	979822	720483	588452	672274	622165	758228	696959	713243	739335	701956	677718	587639	785419	807350	266944	505433	689894	684869	275105
442.128	15.404		0		#N/A			2.52845	#N/A		nFla'nFlaB'PQC'UI'UIB	Villol	0	bp				0.31	0.31	977040	pos718	0		H	pos	24	476066	535491	702450	599139	559049	397080	380986	333256	466655	381821	977040	576063	458968	552821	615952	429962	473358	512426	650668	424186	358669	331730	602424
136.058	8.8976				0.1						nFla'nFlaB'PQC'UIB		0	bp	xC13			0.4	0.67	975285	pos792	0			pos	23	975285	901526	863217	953164	947828	585600	497957	688123	758705	743781	659522	673746	170704	735086	666918	241596	0	251534	218262	225131	426191	199140	394297
157.085	12.2227	C6H8N2O2	7	Methylimidazoleacetic acid	8	Central	KEGG_HMDB	-2.58613	16.8863		nFla'nFlaB'PQC'UI'UIB	Methylimidazoleacetic acid	0	bp				0.08	0.25	969746	pos793	0		NH3	pos	24	377037	413823	492921	527496	403325	458461	736153	755540	885550	646515	755734	692423	691650	629894	619062	834473	556143	704590	834550	969746	569055	651584	687161
612.689	20.5456										nFla'nFlaB'PQC'UI'UIB		0	bp				0.16	0.43	962277	pos794	0			pos	24	630144	644796	827491	529733	962277	506123	643026	352650	691961	544213	620053	734459	472321	587154	650588	604621	331099	473995	925367	618793	600130	425397	651794
259.142	8.68313	C12H21NO5	1	N-(3-oxooctanoyl)-L-homoserine	7	0	Metacyc	-0.490175	33.65		PQC'UI'UIB	N-(3-oxooctanoyl)-L-homoserine	0	bp				0.16	0.27	962047	pos795	0		H	pos	16	0	0	0	236230	0	0	0	157441	0	0	400783	402089	557412	437807	529954	962047	547793	917352	836187	234537	375025	428918	259858
145.973	29.5866				0.2						nFla'nFlaB'PQC'UI'UIB		0	bp				0.2	0.2	957657	pos757	0			pos	24	545087	715709	753260	813925	747037	548549	516492	647339	540208	639853	957657	811100	613574	790902	596803	847043	756302	567844	700915	702044	528170	667420	759372
678.633	16		0		#N/A			2.36446	#N/A		nFla'nFlaB'PQC'UI'UIB	[ST (20:0)] cholest-5-en-3beta-yl (11Z-eicosenoate)	0	bp				0.22	0.25	957064	pos796	0		H	pos	24	801429	622117	502081	583374	687243	561797	391498	740568	716622	500494	600855	809151	674044	957064	574471	476435	689227	854051	820441	714415	614014	696084	852402
132.053	14.9409	C4H8N2O3	6	L-Asparagine	10	Central	KEGG_Metacyc_HMDB	-0.145072	0.351319		nFla'nFlaB'PQC'UI'UIB	L-Asparagine	0	bp			x-NH3x-H2O	0.21	0.29	955263	neg251	0		H	negneg	24	898291	567635	528426	469126	804140	691833	618347	511649	412330	695977	697708	527879	437825	467884	452305	492367	955263	900812	705144	422725	585208	747287	598637
141.941	19.482										nFla'nFlaB'PQC'UI'UIB		0	bp				0.12	0.24	949625	pos797	0			pos	24	674256	568978	468055	506100	675540	949625	750972	720005	489611	752823	577774	590452	504412	460202	461835	544927	687581	718066	422158	503844	762759	774216	468470
772.525	3.63558		0		0.2			-0.954247	#N/A	-1.01054	nFla'nFlaB'PQC'UI'UIB	PG(36:3)	0	bp				0.08	0.15	943431	neg292	0		H	neg	24	839200	696764	804850	734062	807534	583690	476079	488532	495009	665407	932402	848353	943431	907135	778768	842332	852674	844115	693750	585774	769537	610158	609739
382.233	13.4104	C17H30N6O4	1	Lys-Val-His	7	0	Peptides	-0.288917	-23.4552	-0.321554	nFla'nFlaB'PQC'UI'UIB	Lys-Val-His	0	bp			x2+	0.33	0.48	942074	pos798	0		H	pos	24	370498	445790	323505	409276	513441	344885	294720	471889	411659	571767	495907	922388	594590	648353	387248	673826	674820	666834	756669	460725	942074	390838	363171
767.073	17.4502		0		0.1			-0.0198753	#N/A		nFla'nFlaB'PQC'UI'UIB	NADPH	0	bp	xNa+			0.19	0.33	939427	pos799	0		Na	pos	24	422770	559524	630210	802641	471903	537150	438434	414901	857249	471349	939427	616328	627308	661107	763224	548491	479472	480103	445504	728851	494381	439607	593921
557.333	7.11319		0		#N/A			0.912509	#N/A	0.374654	nFla'nFlaB'PQC'UI'UIB	Lys-Lys-Trp-Pro	0	bp				0.73	0.73	933287	neg279	0		H	neg	24	211880	139090	148250	247413	202881	335761	145788	180644	85835.9	138787	933287	340925	355601	265496	163840	102266	117923	100893	322289	215480	318327	209306	344532
228.981	15.5951				0.1						nFla'nFlaB'PQC'UI		0	bp	xK+			0.36	0.93	921724	pos800	0			pos	23	250585	625494	921724	523650	434259	227407	375788	318054	484804	144755	172166	385416	400327	307315	521856	217259	167147	410309	545510	229494	0	202510	649361
332.206	16.8877	C14H28N4O5	1	Lys-Val-Ser	7	0	Peptides	0.500114	18.1504	0.536649	nFla'nFlaB'PQC'UI'UIB	Lys-Val-Ser	0	bp		12.6	xC13	0.08	0.24	920434	pos801	0		H	pos	24	555870	676278	671634	803510	683714	573416	567589	588694	920434	578841	546564	671664	674184	632832	607424	623905	591956	716532	907010	757520	645897	578339	860900
135.933	15.7972				0.1						nFla'nFlaB'UI'UIB		0	bp	xK+		xNa+	0.56	0.56	919101	pos802	0			pos	23	839572	499089	481107	313605	650298	565388	526833	494490	293459	799821	0	680641	650799	674526	575801	272987	784619	544412	419075	368374	919101	506064	327398
746.565	27.7										nFla'nFlaB'PQC'UI'UIB		0	bp				0.13	0.41	917915	pos803	0			pos	24	533392	658740	854920	403769	809118	470628	526793	472078	529466	631619	706382	806382	605869	839190	794572	346073	881569	917915	548282	318473	674392	412947	464030
320.068	18.5145		0		#N/A			-0.803536	#N/A		nFla'nFlaB'PQC'UI	Dehydrorabelomycin	0	bp				0.04	0.61	915847	pos805	0		H	pos	23	202357	450336	577428	384908	341375	396928	347962	468686	519559	297396	488471	437476	461850	481320	474820	383369	167611	915847	758661	328582	0	341941	368086
178.099	4.1207	C11H14O2	5	Eugenol methyl ether	7	0	KEGG_Metacyc	0.0613176	-5.5611	0.105384	nFla'nFlaB'PQC'UI'UIB	Eugenol methyl ether	0	bp				0.05	0.17	914580	neg294	0		H	neg	24	866126	663993	804372	621810	797152	914580	784080	695495	619316	611778	711275	635737	669472	643386	677801	622836	775579	658527	570104	691917	520868	581138	605716
134.999	7.76075										nFla'nFlaB'PQC'UI'UIB		0	bp				0.14	0.6	911765	neg295	0			neg	24	673956	671819	875517	205810	909615	230332	675414	200527	496585	911765	665245	635375	548787	671184	470081	289961	506675	377156	426390	176716	464154	172689	325640
447.168	12.6506		0		0.1			0.248368	#N/A		nFla'nFlaB'PQC'UI'UIB	Stypandrol	0	bp	xC13			0.34	0.34	906929	pos806	0		NH3	pos	24	424027	522616	514448	484579	900033	558626	402955	602548	498798	745815	906928	649477	564865	639419	323365	592804	703767	847878	690381	546507	528518	457603	540978
288.155	16.9068	C10H20N6O4	2	Asn-Arg	7	0	Peptides	1.5	-14.2642		nFla'nFlaB'PQC'UI'UIB	Asn-Arg	0	bp				0.08	0.13	897080	pos808	0		H	pos	24	509602	537013	509483	569480	572800	506922	458674	561316	484254	479250	515521	454278	446002	534860	520875	897080	698328	880183	723319	515819	453113	576946	539955
684.275	27.1853		0		#N/A			2.47489	#N/A	-2.50806	nFla'nFlaB'PQC'UI	Met-Trp-Trp-Tyr	0	bp				0.13	0.87	895820	pos809	0		H	pos	24	148029	170990	297193	746668	270926	128618	310703	185138	643390	128256	471004	347554	377020	366996	354190	338283	289233	167733	888723	480869	126161	129309	895820
203.188	2.85832	C11H22O2	26	9:0(8Me,8Me)	7	0	Lipidmaps	-0.325322	-39.9423		nFla'nFlaB'PQC'UI'UIB	9:0(8Me,8Me)	0	bp				0.14	0.14	891747	pos810	0		NH3	pos	24	891747	796165	802188	813937	752134	783759	838879	773041	843419	780510	567272	744117	702953	736338	842284	768727	769659	794676	708276	693549	851659	768821	842240
297.267	6.15241	C18H35NO2	11	3-Ketosphingosine	7	0	KEGG_Lipidmaps	1.00334	37.6136	1.075	nFla'nFlaB'PQC'UI'UIB	3-Ketosphingosine	0	bp				0.29	0.29	890654	pos811	0		H	pos	24	682900	688588	483408	585935	833065	486992	562131	488783	459021	622283	835151	486680	455735	890654	758240	550934	363559	437176	394073	429071	442449	497110	571864
284.062	17.7484		0		0.1			-0.467408	#N/A		nFla'nFlaB'PQC'UI'UIB	L-beta-aspartyl-L-glutamicacid	0	bp	xNa+			0.08	0.24	887621	pos812	0		Na	pos	24	478102	532879	482598	459327	548635	479529	404193	577372	465702	466961	693524	609672	630152	743798	718012	798467	805445	887621	488699	479015	451240	384080	373221
249.98	28.1431										nFla'nFlaB'PQC'UI'UIB		0	bp				0.07	0.1	887578	pos813	0			posneg	24	829967	824794	749717	743197	879073	856055	842591	887578	763531	790158	835506	755174	732330	832160	853892	845742	871292	744961	701361	835244	846034	767878	745916
494.253	7.17498	C18H36N6O5S	2	Glutathionylaminopropylcadaverine	8	Central	KEGG	1.35242	0		nFla'nFlaB'PQC'UI'UIB	Glutathionylaminopropylcadaverine	0	bp				0.22	0.3	886668	neg297	0		Formic Acid	neg	24	545896	517276	886668	470984	481945	308456	557856	432834	488113	331692	191716	342087	279240	245518	315536	298099	466787	436174	388993	410370	271525	393501	387786
399.139	16.0728		0		0.2			-0.0559881	#N/A	1.02133	nFla'nFlaB'PQC'UI'UIB	Difloxacin	0	bp				0.15	0.22	885852	pos814	0		H	pos	24	723714	711937	648182	724861	705236	611484	724376	665657	532591	631326	747709	541107	650687	546412	534273	885852	638156	694877	522164	465136	413627	552002	533386
376.589	15.6906										nFla'nFlaB'PQC'UI'UIB		0	bp				0.44	0.68	885271	pos815	0			pos	24	363209	181032	260972	171613	223553	139591	350063	185933	256892	336218	827754	338355	412080	357271	380466	174611	885271	271250	565835	231143	402816	318005	471642
415.153	11.3338	C16H25N5O6S	1	Glu-His-Met	7	0	Peptides	0.15168	-41.1707	0.165702	UI	Glu-His-Met	0	bp				0.66	0.98	882744	pos804	0		H	pos	19	0	417289	253520	555338	508696	0	0	356212	558508	332719	882744	593621	440618	513984	0	778032	174512	289063	444697	412003	145468	0	663240
206.97	14.8664		0		0.1			-0.0976417	#N/A		nFla'nFlaB'UI'UIB	phosphoglycolohydroxamate	0	bp	xCl		xCl37	0.56	0.71	878571	neg298	0		Cl	neg	23	158926	588938	843800	872876	418921	181740	269754	486438	878571	218070	0	862307	757110	833785	777338	492667	212357	293103	747660	705462	237361	85157.9	682327
765.577	4.42359										nFla'nFlaB'PQC'UI'UIB		0	bp				0.19	0.19	878500	neg290	0			negneg	24	627722	680206	810659	551633	705459	621096	478852	688580	712045	658362	846158	647126	686984	537019	549772	640650	616836	878500	722249	526546	624318	523631	605076
148.016	12.7333										nFla'nFlaB'PQC'UI'UIB		0	bp				0.09	0.16	873047	pos816	0			pos	24	631180	648556	736655	510119	794273	679022	592206	609066	609417	757151	649575	713926	708835	736868	579507	726296	869421	804795	824320	855694	873047	738843	818749
346.16	17.0612	C12H22N6O6	1	Asp-Gly-Arg	7	0	Peptides	0.454663	-37.1422	0.456915	nFla'nFlaB'PQC'UI'UIB	Asp-Gly-Arg	0	bp				0.11	0.24	866908	pos818	0		H	pos	24	466439	430244	473354	522554	509282	574764	460955	480314	800895	557518	671968	539170	555859	558446	502038	646860	613071	866908	643578	712972	527261	572570	510613
730.6	18.4904		0		#N/A			1.51195	#N/A		nFla'nFlaB'PQC'UI'UIB	SM(d36:1)	0	bp				0.05	0.31	866064	pos819	0		H	pos	24	571834	633964	811004	359552	711658	447817	322706	428116	445290	433957	856717	789687	779593	859875	866064	328269	692196	684256	515170	350852	345804	395835	350015
202.107	14.8992										nFla'nFlaB'PQC'UI'UIB		0	bp				0.22	0.59	863747	pos820	0			pos	24	415935	325385	377172	214789	373308	404427	454502	591805	298829	347508	535905	323106	365558	336006	422336	381002	377501	458453	250525	324009	863747	412533	214694
645.906	16.0855										nFla'nFlaB'PQC'UI'UIB		0	bp				0.3	0.42	859468	pos821	0			pos	24	500090	664364	518648	490661	564334	535280	223991	521235	788783	398059	246449	507163	450610	370362	579711	271485	630473	584079	859468	584259	654093	498520	558911
621.606	7.374	C40H79NO3	5	Cer(d40:1)	8	Central	HMDB	-0.48828	45.7554		nFla'nFlaB'PQC'UI'UIB	Cer(d40:1)	0	bp		2.8	xC13	0.16	0.16	859118	neg299	0		H	neg	24	645773	577808	500265	674595	638266	643411	447637	582576	550270	677042	679585	782221	772974	755476	508600	741844	859118	665811	719509	651442	685245	531824	599568
237.115	15.4636	C8H16N2O3S	2	Met-Ala	7	0	Peptides	-0.355437	35.8221		nFla'nFlaB'PQC'UI'UIB	Met-Ala	0	bp				0.21	0.21	858245	pos822	0		NH3	posneg	24	438774	466745	562200	475443	555149	487114	492703	552553	433277	490239	858245	755991	652562	576534	513835	650198	690567	680871	654643	535757	617555	729865	707305
244.178	4.56187	C12H24N2O3	4	N-(6-Aminohexanoyl)-6-aminohexanoate	7	0	KEGG_Metacyc_Lipidmaps	-1.13978	-39.0638		nFla'nFlaB'PQC'UI'UIB	N-(6-Aminohexanoyl)-6-aminohexanoate	0	bp		2.9	xC13	0.09	0.21	852727	neg300	0		H	neg	24	547680	619755	582848	476954	595133	542428	533953	566652	471845	559120	852727	671266	733387	725502	726279	505468	795291	804436	648636	447873	540813	629867	463275
247.106	15.8565	C10H17NO6	2	Linamarin	7	0	KEGG_Metacyc	2.48725	48.8157		nFla'nFlaB'PQC'UI'UIB	Linamarin	0	bp			x2-mer	0.09	0.22	849583	pos824	0		H	pos	24	471428	553812	671976	572378	627957	577582	451994	583782	660105	561297	678846	756330	776960	683285	615673	582412	543656	726738	783904	588780	507245	560136	849583
216.147	4.82411		0		#N/A			-0.169216	#N/A		nFla'nFlaB'PQC'UI'UIB	Val-Val	0	bp				0.1	0.43	847390	neg302	0		H	neg	24	476757	410135	358544	176525	401312	392335	365559	409019	242220	333419	486145	591084	537710	548668	456576	268250	847390	601086	518797	299181	427437	464829	334363
155.074	28.5242										nFla'nFlaB'PQC'UI'UIB		0	bp				0.07	0.13	846885	pos825	0			pos	24	602666	660030	764060	764380	644283	606354	683479	708099	802345	618302	757457	687814	705044	659952	626012	697957	645718	649305	846884	721039	699793	605404	774687
227.091	13.3523		0		#N/A			0.203265	#N/A	0.234021	nFla'nFlaB'PQC'UI'UIB	Deoxycytidine	0	bp				0.44	0.44	844499	pos807	0		H	pos	24	245802	268512	221950	259779	391235	324697	319040	335323	339932	342478	844499	515401	443001	548363	211952	332440	346846	538774	420723	397315	419904	330559	169940
238.996	15.478										nFla'nFlaB'PQC'UI'UIB		0	bp				0.77	0.77	841399	neg304	0			negneg	24	228625	123389	160727	75358.7	163227	191693	195726	139897	128836	300208	841399	250478	200624	224391	256426	89195.1	310202	253998	122600	137099	369942	244894	107147
374.107	17.148	C12H24N4O4S2	1	Lys-Cys-Cys	7	0	Peptides	2.95049	17.8983		nFla'nFlaB'PQC'UI'UIB	Lys-Cys-Cys	0	bp				0.33	0.33	840792	pos826	0		Na	posneg	24	443582	443237	611040	631454	840792	339616	387542	550693	738810	614778	793502	446712	399907	406677	443953	308949	420210	515970	401932	292376	327973	234328	394920
660.675	20.7349										nFla'nFlaB'UIB		0	bp				0.74	0.99	840484	pos827	0			pos	23	336523	415464	482466	185718	203475	288996	214980	212416	840484	242419	0	178471	315596	382508	574034	102981	194673	192887	788692	684640	328356	206408	543364
620.296	3.87957	C29H49O12P	1	[PI(20:4)] 1-(5Z,8Z,11Z,14Z-eicosatetraenoyl)-sn-glycero-3-phospho-(1'-myo-inositol)	7	0	Lipidmaps	-0.244982	-3.10421	0.297826	nFla'nFlaB'PQC'UI'UIB	[PI(20:4)] 1-(5Z,8Z,11Z,14Z-eicosatetraenoyl)-sn-glycero-3-phospho-(1'-myo-inositol)	0	bp		1.3	xC13	0.23	0.23	839497	neg305	0		H	neg	24	306379	383312	395108	287612	495031	414314	286480	422810	419729	468847	839497	544792	590826	594652	475857	280171	480687	453783	465724	707231	747727	665068	790136
381.175	17.9944	C14H24N2O9	1	N-Acetylmuramoyl-Ala	7	0	KEGG	0.122292	41.2022		nFla'nFlaB'PQC'UI'UIB	N-Acetylmuramoyl-Ala	0	bp				0.09	0.32	837683	pos828	0		NH3	pos	24	544920	459488	484148	370886	680688	387135	483861	601459	482005	837683	546059	678745	560045	573402	560892	427426	672002	305964	477246	460622	426266	385920	410974
134.094	7.1787	C5H12O	5	3-Methylbutanol	7	0	KEGG_Metacyc_Lipidmaps_HMDB	0.311972	19.2513		nFla'nFlaB'PQC'UI'UIB	3-Methylbutanol	0	bp			x-H2O	0.21	0.38	837572	neg306	0		Formic Acid	neg	24	837572	549894	530842	311035	587586	810646	538500	346566	409622	374964	179769	206199	292962	198641	261069	599791	514336	723389	387507	595329	382030	506171	504367
374.191	13.3827	C14H26N6O6	3	Asn-Lys-Gly-Gly	7	0	Peptides	0.147517	-47.1168	0.134951	nFla'nFlaB'PQC'UI'UIB	Asn-Lys-Gly-Gly	0	bp				0.23	0.23	837525	pos829	0		H	pos	24	717342	783418	828186	713032	837525	460578	510472	564256	378836	485339	727978	461275	458473	465605	471431	432513	514271	591782	415288	289788	342197	421533	375627
162.126	7.0394										nFla'nFlaB'PQC'UI'UIB		0	bp				0.09	0.16	834625	pos830	0			pos	24	608687	562812	506422	610967	568916	834625	657410	591735	648642	560143	561590	537703	617695	502386	507492	558724	506199	557079	573463	619071	620628	604477	571431
417.857	15.2746				0.1						nFla'nFlaB'UI'UIB		0	bp	xK+			0.58	0.58	833977	pos831	0			pos	23	326234	279208	250674	253508	340011	715237	314427	515491	501239	635300	0	592043	821448	714227	599724	500073	705151	711514	704599	681418	833977	688735	598770
744.494	3.37076		0		0.1			0.123486	#N/A	0.135914	nFla'nFlaB'PQC'UI'UIB	PG(34:3)	0	bp	x-NH3	2.4	xC13	0.11	0.49	829800	neg289	0		H	neg	24	493232	603945	694262	545800	794186	450737	540483	517186	528513	598465	829800	668485	662516	727915	631447	580932	169336	629160	797974	488084	444921	577508	521460
288.078	12.522		0		#N/A			-1.63655	#N/A		nFla'nFlaB'PQC'UI	lachnanthocarpone	0	bp				0.36	0.68	823786	pos832	0		H	pos	23	233720	657306	575683	619243	823786	523664	367519	679410	687405	391832	772764	561804	462953	530622	253605	403276	138015	727686	550283	315038	0	247172	431914
743.545	27.7369		0		#N/A			-1.53126	#N/A	-1.56302	nFla'nFlaB'PQC'UI'UIB	PE(36:2)	0	bp				0.29	0.35	815463	pos833	0		H	pos	24	407859	346470	391552	234392	409747	266250	288199	467198	200581	358488	548703	463149	430542	760149	815463	338022	676352	377121	385953	228498	301287	246243	310758
145.973	31.8157										nFla'nFlaB'PQC'UI'UIB		0	bp				0.39	0.39	814588	pos834	0			pos	24	303723	398953	397791	531723	480992	310269	503656	427218	371030	550145	814588	552249	419914	356373	344328	623783	500760	407900	354235	352105	319859	513685	472623
368.242	20.1006										nFla'nFlaB'PQC'UI'UIB		0	bp		C20	xC13x2+	0.05	0.17	813607	pos835	0			pos	24	568934	638661	674916	585229	634226	723133	606642	603420	694387	657069	743139	686002	744756	774698	704486	540631	696261	813607	790507	581660	610708	648597	648021
188.127	21.7024	C7H16N4O2	5	Homoarginine	8	Central	KEGG_Metacyc_HMDB	-0.0974261	8.16493		nFla'nFlaB'PQC'UI'UIB	Homoarginine	0	bp				0.09	0.1	805749	pos837	0		H	pos	24	702328	679539	717189	805749	796808	618568	694024	752189	802980	685352	793594	658919	674816	671455	650585	700650	714588	659796	750639	768737	748955	749038	725915
301.139	18.2139	C11H16N4O5	2	Coformycin	7	0	KEGG_Metacyc	1.5821	-2.06771		nFla'nFlaB'PQC'UI'UIB	Coformycin	0	bp				0.22	0.42	805196	pos839	0		NH3	pos	24	676438	374300	353392	235137	636942	364934	379705	392311	321548	592518	805196	608949	567299	468222	514698	345338	620255	522318	338518	273303	460304	342011	275832
649.637	7.34315	C42H83NO3	3	[SP (24:0)] N-(tetracosanoyl)-sphing-4-enine	7	0	KEGG_Lipidmaps_HMDB	-1.03582	45.5275		nFla'nFlaB'PQC'UI'UIB	[SP (24:0)] N-(tetracosanoyl)-sphing-4-enine	0	bp		3.1	xC13	0.21	0.21	800006	neg307	0		H	neg	24	532798	598698	500944	701838	637822	575463	457515	515299	586708	692197	650622	594057	586677	749267	400202	800006	652803	649134	649673	740175	749806	591327	608141
739.512	3.73514							-4.31901			nFla'nFlaB'PQC'UI'UIB		0	bp		C41	xC13	0.13	0.38	799966	neg308	0			neg	24	589681	436719	776408	670549	582976	302382	566128	322073	758109	542740	426291	467996	401684	349437	492161	799966	569676	720931	665715	527148	468799	689342	612345
274.128	15.0337	C10H18N4O5	5	N2-Succinyl-L-arginine	8	Central	KEGG_Metacyc	0.514312	12.973	0.56004	nFla'nFlaB'PQC	N2-Succinyl-L-arginine	0	bp				0.22	0.22	797410	pos841	0		H	pos	17	580824	765849	797410	660199	567783	450220	503541	472812	414587	475665	500730	321941	340869	495027	355380	0	0	0	128762	0	316313	0	0
713.493	3.33002	C79H144O17P2	6	CL(18:2(9Z,12Z)/18:1(11Z)/18:1(11Z)/16:1(9Z))	7	0	HMDB	-0.940984	-20.1196		nFla'nFlaB'PQC'UI'UIB	CL(18:2(9Z,12Z)/18:1(11Z)/18:1(11Z)/16:1(9Z))	0	bp				0.1	0.2	793225	neg310	0		2-charge	neg	24	515577	622451	556550	555482	519729	633768	455845	603627	600407	572688	311523	302667	374671	345526	302021	793225	494015	594022	694643	732078	464624	747161	597201
177.115	14.7058		0		#N/A			0.155875	#N/A		nFla'nFlaB'PQC'UI'UIB	Phenmetrazine	0	bp				0.14	0.24	786827	pos843	0		H	pos	24	338688	510887	516252	522272	373104	285758	429786	514878	483439	426714	786826	555576	602125	664639	591355	607169	400333	458211	677265	595045	372415	405540	646386
358.149	13.4437	C14H22N4O7	4	Ala-Asp-Gly-Pro	7	0	Peptides	0.851906	-42.8643		nFla'nFlaB'PQC'UI'UIB	Ala-Asp-Gly-Pro	0	bp				0.18	0.44	786157	pos840	0		H	pos	24	462926	492759	508331	471509	618143	524122	446045	597997	110805	520434	786157	614491	653669	584519	484816	593453	669577	747534	449625	576434	668281	444426	506101
381.023	16.8589		0		#N/A			0.462926	#N/A		nFla'nFlaB'PQC'UI'UIB	N-Acetyl-D-glucosamine 1,6-bisphosphate	0	bp				0.1	0.34	785844	pos844	0		H	posneg	24	764404	522731	578076	413703	785844	409949	341797	346122	405986	605378	509018	516666	421764	422615	446926	148428	345879	275517	212666	146266	267879	210914	177862
178.048	14.9291		0		0.2			0.219563	#N/A	0.318782	nFla'nFlaB'PQC'UI'UIB	D-Glucono-1,5-lactone	0	bp				0.29	0.29	784591	neg311	0		H	neg	24	331327	338417	457590	299705	324353	372124	323053	331300	486360	350246	784591	496150	413553	483874	422430	468529	417243	555411	432675	381808	431639	358257	248797
723.519	27.7571		0		0.1			-1.99973	#N/A	1.37007	nFla'nFlaB'PQC'UI'UIB	PE(P-36:4)	0	bp	xNa+			0.25	0.33	781780	pos845	0		H	pos	24	406440	558394	498440	353895	591551	202827	246641	398816	411635	330715	738282	478470	464148	781780	538435	209039	512994	442315	398925	266194	303371	328332	427389
143.975	27.7908				0.2			3.62929			nFla'nFlaB'PQC'UI'UIB		0	bp				0.26	0.38	780732	pos846	0			pos	24	508287	521105	474126	526973	583168	546844	659068	780732	440795	681376	738785	544300	451854	420951	429044	329581	620304	256039	467225	374287	446909	537741	416765
660.051	20.5306										nFla'nFlaB'PQC'UI'UIB		0	bp				0.16	0.29	780025	pos847	0			pos	24	360856	475865	634236	765448	716460	445705	668356	414437	749268	692262	716976	519440	585488	471610	628781	441190	550581	647213	586936	466192	780025	567807	648790
475.178	17.5818		0		0.1			1.0355	#N/A	-2.07405	nFla'nFlaB'PQC'UI'UIB	Met-Tyr-Tyr	0	bp	xNa+			0.11	0.2	767392	pos849	0		H	pos	24	438335	572243	605928	618898	448430	413776	505058	450236	566233	407983	601359	604749	589558	654389	767392	537786	384302	406327	437913	581432	363480	504958	373775
513.207	13.0849	C20H29N9O6	1	Ala-Gln-His-His	7	0	Peptides	2.60661	-22.2786	0.41402	nFla'nFlaB'PQC'UI'UIB	Ala-Gln-His-His	0	bp				0.27	0.31	767099	pos850	0		Na	pos	24	415144	430915	448726	475140	590275	461678	396392	206218	504113	528027	767099	697213	488600	485810	414197	683324	626039	727797	581988	443426	512885	424723	320270
416.37	27.6091				0.1						nFla'nFlaB'PQC'UI'UIB		0	bp	xC13			0.09	0.16	761327	pos851	0			pos	24	578195	620580	539343	694052	638523	617546	568977	510259	524260	696307	722676	680367	625106	607134	740474	593319	761327	593369	525741	634235	687142	652858	474802
218.127	16.4494	C9H18N2O4	5	N2-(D-1-Carboxyethyl)-L-lysine	8	Central	KEGG_Metacyc	1.56366	1.47836		nFla'nFlaB'PQC'UI'UIB	N2-(D-1-Carboxyethyl)-L-lysine	0	bp				0.09	0.24	760705	pos848	0		H	pos	24	420958	442396	512884	473035	482970	433527	428997	425616	627553	486098	478867	589117	568325	598078	579582	495760	595833	681451	672128	528244	572884	458788	760705
186.162	3.81808	C11H22O2	26	[FA (11:0)] undecanoic acid	7	0	Lipidmaps_HMDB	-0.152736	-13.8738	-0.181466	nFla'nFlaB'PQC'UI'UIB	[FA (11:0)] undecanoic acid	0	bp				0.1	0.29	760354	neg314	0		H	neg	24	508024	648045	552812	539941	514760	472954	395615	760354	651381	428867	296718	361987	297290	338047	285563	517231	625318	449183	488012	625901	516510	484783	512018
225.148	17.8598		0		#N/A			-0.267235	#N/A		nFla'nFlaB'PQC'UI'UIB	Pilocarpine	0	bp				0.21	0.77	756161	pos852	0		NH3	pos	24	756161	702596	469992	65429.1	610250	691480	548149	502461	82688.8	496405	144682	120226	210147	173236	152666	280900	384426	466285	35839.6	49648.6	437291	394320	34403.6
247.153	15.1505	C10H21N3O4	1	Lys-Thr	7	0	Peptides	-0.476503	-14.7756		nFla'nFlaB'PQC'UI'UIB	Lys-Thr	0	bp				0.23	0.23	749282	pos853	0		H	pos	24	440682	459961	522765	374629	630156	555213	431488	411742	383815	458226	749282	473671	420974	559615	541125	521043	643423	657905	562858	322599	543234	543417	418999
157.915	15.7435				0.1						nFla'nFlaB'UI'UIB		0	bp	xNa+			0.58	0.58	748818	pos854	0			pos	23	727692	640836	748818	577189	593262	660606	689340	636629	533539	568188	0	617265	620902	520494	723518	583258	641320	659056	613139	541058	567960	699307	574835
225.038	12.5251										nFla'nFlaB'PQC'UI'UIB		0	bp				0.54	0.54	745623	pos855	0			pos	24	366447	408904	622778	342933	318272	115003	372069	123917	375189	233747	287652	295979	276986	285898	745623	364147	295404	366106	343156	296039	280977	327411	297979
203.056	12.5395		0		0.1			0.878911	#N/A		nFla'nFlaB'PQC'UI'UIB	L-Tyrosine	0	bp	xNa+			0.2	0.23	742826	pos856	0		Na	pos	24	386444	427700	309751	286416	427375	272855	215608	279807	401422	334151	358816	455338	447041	457053	276712	577584	534568	537485	742826	385616	470473	259233	450645
463.228	16.1855	C18H33N5O9	2	Asp-Lys-Thr-Thr	7	0	Peptides	0.161344	1.14612	0.174224	nFla'nFlaB'PQC'UI'UIB	Asp-Lys-Thr-Thr	0	bp				0.19	0.39	740092	pos857	0		H	pos	24	278162	275103	480752	421572	299837	232571	414797	279498	571956	294179	378171	565023	411402	389044	529297	309675	563715	382773	740092	453916	358422	332273	692115
332.874	14.6323										nFla'nFlaB'UI'UIB		0	bp			xClxCl37	0.73	0.73	740085	neg317	0			neg	23	354254	406593	622168	468484	319978	379177	598556	291769	454532	268344	0	259020	505348	388357	740085	401706	487807	401522	447154	274391	138075	508791	568341
265.165	6.9381	C13H25NO3	1	N-Undecanoylglycine	7	0	HMDB	0.410921	35.0534		nFla'nFlaB'UIB	N-Undecanoylglycine	0	bp				0.65	0.85	738338	pos859	0		Na	pos	22	586445	142398	432599	368371	595269	438987	457502	407623	176660	156997	0	738338	342689	573140	671252	170827	0	162283	362307	505230	443090	318972	710463
538.516	3.68148				0.1						nFla'nFlaB'PQC'UI'UIB		0	bp	xC13		xCl37	0.15	0.31	737901	neg318	0			neg	24	586524	717377	604534	737901	554440	627998	515073	572160	677844	507627	514290	644547	472093	482803	441844	729396	374559	595001	571048	651033	409167	667518	581432
792.55	3.8015		0		0.1			-2.53388	#N/A	-2.68601	nFla'nFlaB'PQC'UI'UIB	acyl phosphatidylglycerol (n-C12:0)	0	bp	xS34			0.09	0.19	737754	neg319	0		H	neg	24	543427	628702	437231	619265	737754	513014	598818	524005	680122	522694	476896	531558	444458	521950	440902	671583	718384	648795	576975	508017	491521	531156	497117
446.165	12.6423	C17H26N4O10	2	Asp-Thr-Asp-Pro	7	0	Peptides	-0.461493	-26.5589	1.16068	nFla'nFlaB'PQC'UI'UIB	Asp-Thr-Asp-Pro	0	bp		1	xC13	0.42	0.42	737367	neg320	0		H	neg	24	263154	370033	284081	301652	453348	352732	221592	380363	370914	393973	737366	450606	421309	443418	205519	387160	414006	482900	434227	344247	360418	269196	399434
622.687	16.3874				0.1						nFla'nFlaB'PQC'UI'UIB		0	bp	xC13			0.2	0.28	732940	pos823	0			pos	24	311644	504378	596907	581386	494017	534659	413941	599532	619790	577809	322700	491558	499032	516477	574227	411003	392267	532618	432909	431654	380950	439904	732940
129.054	15.252	C4H4N2O2	2	Orotate(Fragment)	8	Central	KEGG_Metacyc_HMDB	0.513137	15.724		nFla'nFlaB'PQC'UI'UIB	Orotate(Fragment)	0	bp				0.21	0.36	730272	pos860	0		NH3	pos	24	274944	313114	356415	407616	272345	392612	325608	289262	459220	319640	627771	411192	401231	420246	437910	447849	395366	476124	425405	394204	336421	380623	730272
181.934	4.69903										nFla'nFlaB'UI'UIB		0	bp				0.63	0.63	728279	neg322	0			neg	23	481190	500142	591751	464386	356093	413655	630761	389343	393570	312936	0	489990	473768	406059	728279	433920	617290	414534	378673	388805	308632	544459	446261
297.986	15.9271										nFla'nFlaB'PQC'UI'UIB		0	bp				0.49	0.6	725352	pos861	0			pos	24	686597	450159	346428	176304	725352	254992	185188	240350	148755	465311	47513.4	320680	354693	314832	235179	142951	375837	320466	142980	156434	445870	368405	94211
113.059	27.2863		0		0.2			-0.183217	#N/A		nFla'nFlaB'PQC'UI'UIB	Creatinine	0	bp			xACN	0.11	0.33	725000	pos862	0		H	pos	24	547014	547064	505429	466266	427430	638392	385451	447027	532103	433429	446050	499084	539946	580773	461996	354912	404530	518455	725000	670424	550926	567365	595717
292.211	21.9316				0.1						nFla'nFlaB'PQC'UI'UIB		0	bp	x2-mer	C15	xC13	0.1	0.25	722732	pos863	0			pos	24	527549	599736	636241	600848	722732	402990	302469	376609	540670	489337	608783	560520	536085	610420	473786	236424	351892	368210	415896	402563	377700	295095	579998
360.132	17.9271	C18H20N2O6	4	Dityrosine	7	0	HMDB	0.200677	22.6953		nFla'nFlaB'PQC'UI'UIB	Dityrosine	0	bp				0.19	0.3	721089	pos864	0		H	pos	24	321486	431499	394260	306446	455599	357731	470116	382373	381012	364285	612069	458979	489909	467243	353760	512925	653634	721089	343035	329703	447560	342000	351393
230.09	12.0719	C9H14N2O5	1	Aspartyl-L-proline	7	0	Peptides_HMDB	-0.450267	-46.3728	-0.472168	nFla'nFlaB	Aspartyl-L-proline	0	bp				0.72	0.72	720905	pos865	0		H	pos	17	356408	521932	410838	401866	720905	409555	282493	392768	351630	515962	578839	293014	271159	279812	0	77964.9	68062.8	0	0	0	75293.1	0	0
242.019	16.1098	C6H11O8P	2	D-myo-Inositol 1,2-cyclic phosphate	7	0	KEGG_Metacyc_HMDB	-0.0319287	1.311	0.13758	nFla'nFlaB'PQC'UI'UIB	D-myo-Inositol 1,2-cyclic phosphate	0	bp				0.37	0.4	720566	pos866	0		H	pospos	24	412418	272586	306895	184535	436291	253977	238979	288482	206134	448571	720566	369263	329523	357547	394498	194306	525484	441977	312903	248756	468887	414908	156851
792.547	4.13119				0.2			-5.68915			nFla'nFlaB'PQC'UI'UIB		0	bp				0.09	0.71	718385	neg324	0			neg	24	400631	593856	659015	252508	592139	365717	317147	386078	456365	453979	476896	531558	444458	521950	440902	305980	718384	569038	55875	373306	433769	419560	472540
203.002	13.1057				0.1						nFla'nFlaB'UI'UIB		0	bp	xK+			0.61	0.61	717835	pos867	0			pos	23	404596	513286	603809	550398	717835	468092	455883	487087	466871	531784	0	638891	695393	673198	391395	632015	602070	675816	655349	311091	380505	404534	632215
794.557	4.21876	C43H83O8P	9	PA(40:1)	8	Central	0	-2.65142	5.18543		nFla'nFlaB'PQC'UI'UIB	PA(40:1)	0	bp				0.12	0.29	717155	neg325	0		Cl	neg	24	493855	638200	676166	334478	645926	423845	330598	410083	547407	561561	717155	639162	588485	576092	523690	285013	541872	599997	591779	459098	508090	373384	475749
433.566	15.7427	C25H40N7O19P3S	2	Succinyl-CoA	8	Central	KEGG_Metacyc_HMDB	0.630581	0		nFla'nFlaB'PQC'UI'UIB	Succinyl-CoA	0	bp		2.4	xC13	0.21	0.38	716731	pos868	0		2-charge	pos	24	368394	469566	716730	691865	389032	465134	439119	472618	640772	418200	599115	465504	334890	410635	452030	134638	168289	147022	285066	255613	170566	238074	312508
811.691	28.0491		0		#N/A			1.23597	#N/A		nFla'nFlaB'PQC'UI'UIB	Glucosylceramide	0	bp				0.13	0.27	715279	pos869	0		H	pos	24	377242	486493	533384	304563	619434	365412	293004	332054	361534	429574	533877	547605	607827	715279	664049	358916	484762	523016	399320	339099	358241	356749	339189
286.057	14.5383		0		0.1			0.53533	#N/A	0.580361	nFla'nFlaB'UI'UIB	5'-Phosphoribosylglycinamide	0	bp	xK+			0.62	0.62	713929	pos870	0		H	pos	23	506540	713929	514654	517908	689492	467957	314813	383839	657734	426576	0	245702	407753	453824	402910	367385	375104	518528	383189	358610	187660	343084	278107
159.09	12.0698	C7H13NO3	10	5-Acetamidopentanoate	8	Central	KEGG_Metacyc_HMDB	0.429169	34.8361	0.431332	nFla'nFlaB'PQC'UI'UIB	5-Acetamidopentanoate	0	bp				0.1	0.1	711136	pos871	0		H	pos	24	477250	451678	562093	542840	514226	574687	579446	541087	627546	628007	711136	618142	538644	652378	642616	583574	578415	658236	566806	617543	633109	611927	626033
412.581	14.662										nFla'nFlaB'PQC		0	bp				0.5	0.5	710952	pos872	0			pos	15	684034	618424	590329	474016	533986	479318	371462	576120	598327	556392	710952	486798	356635	354857	151710	0	0	0	0	0	0	0	0
237.086	3.96361		0		#N/A			0.298857	#N/A	-1.68355	nFla'nFlaB'PQC'UI'UIB	8-[(aminomethyl)sulfanyl]-6-sulfanyloctanoic acid	0	bp				0.04	0.69	710824	neg327	0		H	neg	24	192274	123164	67360.6	295676	148357	105272	207940	526886	710824	264587	349282	346645	383373	363316	358707	316586	231533	57548.6	381860	444166	180246	630829	406532
245.145	3.76825										nFla'nFlaB'PQC'UI'UIB		0	bp				0.21	0.58	708882	neg328	0			neg	24	294948	278836	363107	492884	351742	240733	221651	227760	541302	149914	302660	379919	407404	394258	535050	230937	248387	339510	708882	466825	211151	245151	303895
130.099	4.40212	C7H14O2	22	FA methyl(6:0)	8	Central	Lipidmaps	0.282239	-31.5317	0.472319	nFla'nFlaB'PQC'UI'UIB	FA methyl(6:0)	0	bp				0.04	0.25	707244	neg329	0		H	neg	24	707244	674615	525206	528816	519919	678602	371577	489836	607700	416223	423874	394219	411623	436221	399184	340675	611784	580362	587175	570399	389569	440781	467904
229.151	12.2022				0.1						nFla'nFlaB'PQC'UI'UIB		0	bp	xC13			0.16	0.17	706009	pos842	0			pos	24	401554	513366	491401	506586	522735	439288	465722	456750	656026	525916	641933	706009	538332	613410	460330	602785	522464	514037	649422	626650	450608	610674	652176
459.273	7.11078		0		0.1			0.570822	#N/A		nFla'nFlaB'UI'UIB	[PE(16:1)] 1-(1Z-hexadecenyl)-sn-glycero-3-phosphoethanolamine	0	bp	xNa+			0.93	0.93	704966	pos874	0		Na	pos	22	450491	248386	576363	371753	704966	404027	369778	473673	182996	374896	0	0	507650	432729	396803	156954	146815	219270	490468	505610	555859	519215	685013
271.164	15.2217	C11H21N5O3	1	Pro-Arg	7	0	Peptides	0.209841	-12.6651	0.235704	nFla'nFlaB'PQC'UI'UIB	Pro-Arg	0	bp				0.18	0.29	704226	pos875	0		H	pospos	24	519402	704226	668443	511482	667767	382631	473153	431936	411610	549613	577246	542183	470792	386946	393775	388466	333219	426288	362401	379583	578073	297112	375635
290.112	15.0596		0		0.1			0.683383	#N/A	-2.44884	nFla'nFlaB'PQC'UI'UIB	N-Succinyl-LL-2,6-diaminoheptanedioate	0	bp	xNH3			0.24	0.27	703039	pos876	0		H	pos	24	428583	417727	549164	421353	632923	453354	460687	488708	548636	366745	703039	429769	499526	474233	400426	498656	533039	622058	312301	446212	444114	478922	301286
191.043	17.6337	C6H9NO6	4	O-Oxalylhomoserine	7	0	KEGG	-0.164747	12.7547	-0.163627	nFla'nFlaB'PQC'UIB	O-Oxalylhomoserine	0	bp				0.14	0.81	701225	pos878	0		H	pos	24	607306	216108	143902	116058	474312	308608	240912	214554	148140	595452	529521	545399	372388	500631	494694	130105	683830	350456	127093	136794	701225	449037	133246
484.094	18.7013										nFla'nFlaB'PQC'UI'UIB		0	bp				0.14	0.32	699093	pos879	0			pos	24	189527	206417	210928	121699	211306	331625	350087	439580	244613	451420	543732	486017	445125	445051	365153	419424	699093	443284	406815	338031	490495	194933	291400
600.327	7.14787	C27H53O12P	1	[PI(18:0)] 1-octadecanoyl-sn-glycero-3-phospho-(1'-myo-inositol)	7	0	Lipidmaps	-0.0578354	44.0393	-0.0572234	nFla'nFlaB'PQC'UI'UIB	[PI(18:0)] 1-octadecanoyl-sn-glycero-3-phospho-(1'-myo-inositol)	0	bp				0.5	0.5	695125	neg321	0		H	negneg	24	239780	256999	247636	272572	326514	303908	231324	277013	218916	226043	695125	365258	290852	302449	217347	208990	204849	238705	408480	288664	318108	241270	436793
262.062	13.1582		0		#N/A			-2.28928	#N/A		nFla'nFlaB'PQC'UI'UIB	[Fv] Furano[2'',3'':6,7]aurone	0	bp				0.17	0.25	695031	pos881	0		H	pos	24	301462	202252	237106	225549	256913	288128	234006	241799	324545	340419	485022	388107	376923	399996	304293	425216	695031	436659	611943	270618	379781	264004	285643
259.164	13.4923										nFla'nFlaB'PQC'UI'UIB		0	bp				0.27	0.36	694861	pos882	0			pos	24	694861	533848	469600	526328	538017	499582	328403	598079	255336	630073	522493	367430	475130	252736	523561	373945	483318	520188	226124	250202	480603	608784	374873
172.11	4.06476	C9H16O3	17	FA oxo(9:0) oxo-nonanoic acid	8	Central	Lipidmaps	0.00844907	-19.1265	0.0353213	nFla'nFlaB'PQC'UI'UIB	FA oxo(9:0) oxo-nonanoic acid	0	bp				0.11	0.32	694605	neg334	0		H	neg	24	435472	481467	519026	440557	500196	279574	413387	311082	293323	317195	328018	394070	298600	359573	377790	402429	694605	332845	522277	407004	354982	434082	450847
172.11	4.40274	C9H16O3	17	FA oxo(9:0) oxo-nonanoic acid	8	Central	Lipidmaps	0.222266	-9.9816	0.327144	nFla'nFlaB'PQC'UI'UIB	FA oxo(9:0) oxo-nonanoic acid	-3.60001e-06	bp				0.1	0.35	694605	neg333	0		H	neg	24	435472	481467	519026	440557	500196	321363	357928	670407	593410	375665	345003	329732	383394	427124	390921	363113	694605	332845	522277	407004	354982	422574	450847
107.048	31.5864										nFla'nFlaB'PQC'UIB		0	bp				0.45	0.83	690935	neg337	0			neg	24	285807	197846	304037	186387	155872	129948	169832	152968	250788	112092	109664	261197	183434	114040	99249	178279	149984	216645	690935	111913	99089.6	108415	329176
254.057	15.5879	C7H14N2O6S	1	5-L-Glutamyl-taurine	8	Central	KEGG_HMDB	-0.0880054	7.1073	-0.0930461	nFla'nFlaB'PQC'UI'UIB	5-L-Glutamyl-taurine	0	bp				0.33	0.33	690721	neg336	0		H	neg	24	256288	262445	353132	345448	285416	351730	353583	308577	424098	337321	690721	399655	365625	343083	385546	300866	330933	346779	360059	303049	274902	278624	423316
199.069	15.3915				0.1						nFla'nFlaB'PQC'UI'UIB		0	bp	x2+			0.17	0.35	690388	pos836	0			pos	24	269802	543624	465661	627975	303485	359310	413665	379244	412592	512544	616247	437269	519755	444757	421299	486415	433080	475978	690388	363053	350455	303348	501527
326.071	28.9968		0		#N/A			0.0788051	#N/A		nFla'nFlaB'PQC'UI'UIB	Triphenyl phosphate	0	bp				0.09	0.09	689243	pos883	0		H	pos	24	611745	579252	645111	689243	601150	596046	579580	611477	644192	496398	577240	563387	587956	678398	540425	674110	638108	603350	652862	654967	602776	625968	662892
187.047	12.0329		0		0.1			0.561379	#N/A		nFla'nFlaB'UI'UIB	3-Methylguanine	0	bp	xNa+			0.57	0.57	686456	pos884	0		Na	pos	23	645469	574581	686456	647182	456357	329249	412708	351550	440418	242323	0	453574	349187	369708	409471	323265	349084	385984	282818	281286	321687	302542	402748
130.024	9.70469										nFla'nFlaB'UI'UIB		0	bp				0.58	0.58	685129	neg338	0			neg	23	443079	481012	600598	420409	396814	371336	318724	248059	685129	242937	0	316321	291312	317218	405029	331192	352076	411120	363421	308100	230086	203955	375597
563.097	17.9982				0.1						nFla'nFlaB'PQC'UIB		0	bp	xNa+			0.12	0.81	683374	pos886	0			pos	23	302359	147564	307270	145371	224867	591213	478182	475531	344089	592577	430945	456654	326278	415931	385624	377373	0	683374	324839	333823	339531	605174	239987
116.009	6.52032										nFla'nFlaB'UI'UIB		0	bp				0.69	0.69	681002	neg340	0			neg	23	329917	423326	637904	377543	208542	379841	681002	321465	436537	293458	0	348695	320519	320450	633392	419171	394905	402239	287978	417990	293801	575597	487067
366.349	3.51328	C24H46O2	6	[FA (24:0)] 15Z-tetracosenoic acid	10	Central	KEGG_Lipidmaps_HMDB	-1.09624	1.14027	-1.24431	nFla'nFlaB'PQC'UI'UIB	[FA (24:0)] 15Z-tetracosenoic acid	0	bp				0.11	0.2	678544	neg341	0		H	neg	24	503708	525698	514141	381023	678544	417881	348255	396872	494474	445770	566538	455555	498080	460155	572345	321181	392470	408195	490540	484871	519265	490726	480719
319.084	13.3924										nFla'nFlaB'PQC'UI'UIB		0	bp				0.25	0.47	675028	pos887	0			pos	24	420380	580265	531618	357969	640298	406490	124420	336593	467930	359016	589079	300407	455444	579342	424712	237676	409226	479715	395798	456988	675028	235668	265062
370.308	27.6048		0		#N/A			-0.675814	#N/A		nFla'nFlaB'PQC'UI'UIB	Di(2-ethylhexyl) adipate	0	bp				0.24	0.3	672662	pos888	0		H	pos	24	412627	542440	413298	557157	441100	234986	461395	349665	292672	237870	672662	509313	425262	355880	525407	320475	548798	423902	456762	437501	511135	246835	309266
244.069	14.3049	C9H12N2O6	3	Pseudouridine	8	Central	KEGG_Metacyc_HMDB	-0.697906	17.3066	-0.844866	nFla'nFlaB'PQC'UI'UIB	Pseudouridine	0	bp				0.48	0.52	671661	neg326	0		H	neg	24	211264	271757	124759	205097	333182	324143	89506.6	326303	309725	357594	671661	416751	372253	373939	137698	346337	355042	540188	475655	366845	525142	189469	225730
848.663	7.07218										nFla'nFlaB'PQC'UI'UIB		0	bp		C48	xC13	0.24	0.27	668232	neg315	0			neg	24	439075	440637	470337	440154	497390	390822	403538	406546	479634	426228	668232	552922	392901	466939	384360	417277	588160	636393	359356	449666	432702	441884	448704
395.277	3.42292				0.1						nFla'nFlaB'PQC'UI'UIB		0	bp	x2+			0.37	0.37	668171	neg344	0			neg	24	500218	508679	417861	507880	436799	569165	459226	668171	435039	627309	378290	376606	277868	448836	142704	590624	374754	442771	519759	556809	519311	470963	428543
522.74	7.17033										nFla'nFlaB'UI'UIB		0	bp					0.37	667067	neg345	0			neg	20	377670	542958	460538	667067	379372	334123	354023	358185	421863	510816	84638	0	0	0	0	307980	161506	240784	355530	620913	340745	209006	445606
478.239	14.9455	C18H31N5O9	14	Asn-Glu-Ile-Ser	7	0	Peptides	0.473597	33.0901		nFla'nFlaB'PQC'UI'UIB	Asn-Glu-Ile-Ser	0	bp				0.14	0.44	667022	pos890	0		NH3	pos	24	566485	386588	422943	293682	471570	667022	482688	471735	387182	518188	424324	462577	338535	494692	468060	531192	442339	509113	146936	386725	429068	542625	175921
442.871	9.40314										nFla'nFlaB'UI'UIB		0	bp				0.59	0.59	660667	neg346	0			neg	23	546182	530458	602394	577752	554078	495239	653823	494678	500879	425570	0	541446	476836	432830	629116	497712	556567	488395	438063	362960	470847	660666	560506
272.101	11.6675	C11H13NO6	1	Nicotinate D-ribonucleoside	8	Central	KEGG_Metacyc_HMDB	-0.275852	-46.8962		nFla'nFlaB'PQC'UI'UIB	Nicotinate D-ribonucleoside	0	bp				0.28	0.28	660541	pos891	0		NH3	pospos	24	660541	483257	400401	415971	554361	603554	313045	536200	523234	605611	594436	525489	378350	418295	280033	488276	481983	608390	414050	406270	504823	600644	472596
261.031	15.9368										nFla'nFlaB'PQC'UI'UIB		0	bp				0.07	0.34	660114	neg347	0			neg	24	456323	371725	433099	245513	550113	396538	399862	386432	308730	414526	477864	420286	424320	423828	396566	383520	642201	660114	335885	298701	505353	526922	297108
168.126	7.11347		0		0.4			-0.150326	#N/A		nFla'nFlaB'UI'UIB	N-Methyltyramine	0	bp				1	1	656500	pos885	0		NH3	pos	22	491636	342770	450337	441405	514943	501465	389949	538661	482350	407213	212494	384633	0	0	235612	656500	190461	437545	375908	525881	646538	376911	517265
453.105	18.6436										nFla'nFlaB'PQC		0	bp				0.12	0.34	656061	pos893	0			pos	20	656061	480534	356341	291615	650861	318087	230381	370206	200940	459148	378514	290751	293854	306234	285134	0	42616.3	115437	36745.8	0	86312.9	109066	0
93.9352	5.31004										nFla'nFlaB'UI'UIB		0	bp				0.61	0.61	655975	neg349	0			neg	23	508203	438219	655975	467144	391188	408638	582702	375282	581984	394767	0	369838	352966	280956	482181	454991	406274	382694	280411	438751	360137	503437	568511
181.085	12.2301		0		0.2			0.151834	#N/A		nFla'nFlaB'PQC'UI'UIB	Ricinine	0	bp				0.07	0.17	654075	pos894	0		NH3	pos	24	498848	430799	545249	494335	405760	460799	422332	460533	592142	522210	544238	536638	467178	468318	491463	551982	484317	538067	545017	507972	408432	654075	510265
245.913	12.3429				0.4						UI'UIB		0	bp				1.81	1.81	653567	neg350	0			neg	23	125541	92513.5	423167	117503	34838.6	52985.6	413730	40848.8	59032.3	40389	0	33552.9	44954.8	41246.8	653567	44698	71837.6	36962.6	33521.8	37925.7	36991.4	143106	106069
482.985	18.3934	C9H16N3O14P3	1	CTP	8	Central	KEGG_Metacyc_HMDB	1.14216	0		PQC	CTP	0	bp				0.19	1.31	652105	pos895	0		H	pos	23	433221	56386.2	93406.4	77623.1	82641.2	76046.9	0	58265.7	82552.3	420204	169371	187604	195482	253734	254048	57844.2	354392	72259.1	145690	100937	652105	115812	141616
265.067	11.3667	C9H13N3O5	4	Cytidine	10	Central	KEGG_Metacyc_HMDB	0.0974433	0.18168		nFla'nFlaB'PQC'UI'UIB	Cytidine	0	bp				0.25	0.34	649536	pos896	0		Na	pos	24	258276	511281	514802	385465	649536	574904	308114	415533	354490	431954	569536	482856	399557	396642	281563	347101	295498	343610	310888	353833	373366	227448	424479
109.064	15.0398	C5H7N3	2	Brunfelsamidine	7	0	KEGG	0.570601	-2.01426		nFla'nFlaB'PQC'UI'UIB	Brunfelsamidine	0	bp				0.17	0.27	644796	pos898	0		H	pos	24	418045	348579	644796	417350	363022	407745	448612	463500	455138	384932	401603	587973	489425	407192	539356	473566	534419	471194	339924	398219	450108	517876	413992
245.782	14.8291				0.1						nFla		0	bp	xCl37			0.94	1.37	644312	pos899	0			pos	17	487665	504018	282213	127907	360286	432752	644312	315349	0	360219	0	0	278858	194163	210355	285747	439738	303282	0	0	0	476228	0
312.057	17.4904				0.1						nFla'nFlaB'PQC'UI'UIB		0	bp	xNa+			0.38	0.38	644110	pos889	0			pos	24	243898	260635	291410	403188	281920	247931	255347	237325	408476	293135	644110	428034	197242	407305	433581	330129	383458	290529	356424	403666	334422	284616	426343
423.186	16.5181	C17H25N7O6	2	Asn-Gly-Pro-His	7	0	Peptides	-2.19345	3.1367		nFla'nFlaB'PQC'UI'UIB	Asn-Gly-Pro-His	0	bp				0.12	0.14	636203	pos880	0		H	pos	24	607880	531495	572041	472074	580664	499279	632248	477992	505231	636203	418008	495274	552297	528829	583200	531062	555800	607045	611192	501900	537646	520495	605457
799.666	27.7906				0.1						nFla'nFlaB'PQC'UI'UIB		0	bp	xC13			0.15	0.32	633748	pos901	0			pos	24	453743	399441	223632	275432	459414	306754	196751	255846	392022	282404	633748	420343	587086	513596	567596	158385	332846	245919	233155	209836	250754	228331	249822
116.009	6.18628				0.2						nFla'nFlaB'UI'UIB		0	bp				0.7	0.7	633392	neg351	0			neg	23	418492	419059	594032	493915	337155	342716	589006	279596	408437	273522	0	350099	308203	318284	633392	365721	429447	391831	277924	417990	293708	575597	467686
432.324	27.6455		0		#N/A			0.403546	#N/A		nFla'nFlaB'PQC'UI'UIB	calcitetrol	0	bp				0.32	0.32	631999	pos902	0		H	pos	24	255948	467146	522332	533127	593230	512721	492984	464365	420580	631999	630319	242304	412300	554032	541463	471489	601235	554638	409691	464448	544010	568451	428241
486.671	20.4806										nFla'nFlaB'PQC'UI'UIB		0	bp		C41	xC13	0.13	0.38	628381	pos903	0			pos	24	187346	251687	501475	427878	310128	277123	328760	296206	509199	391911	628381	493822	491859	450057	488612	212258	398694	326813	437467	325308	313156	245181	542090
89.0476	14.9148		0		0.1			-0.507677	#N/A		nFla'nFlaB'PQC'UI'UIB	L-Alanine	0	bp	x-CO2			0.35	0.35	627031	neg353	0		H	neg	24	395386	311142	332966	298118	351641	489654	373596	326690	330737	488807	627030	373216	310229	331183	308868	269678	390419	425317	267182	301251	461172	445201	271515
444.116	13.2003		0		0.1			1.6107	#N/A		nFla'nFlaB'PQC'UI'UIB	Melithiazol A	0	bp	xNa+			0.23	0.57	626198	pos904	0		Na	pos	24	337274	259579	177936	186048	369972	423376	199879	391060	320549	414989	250009	360396	305633	207660	223007	326398	284599	433054	252200	460788	626198	325006	106580
323.196	19.2566		0		#N/A			0.0891003	#N/A		nFla'nFlaB'PQC'UI'UIB	Bz-Arg-OEt	0	bp				0.04	0.19	623009	pos905	0		NH3	pos	24	504281	463212	497769	387500	593843	550643	523222	507536	453647	623008	483475	497301	469574	449158	452275	431161	586093	616060	426542	343869	464804	569464	419491
399.651	21.2841										nFla'nFlaB'PQC'UI'UIB		0	bp				0.16	0.73	622010	pos906	0			pos	24	146410	162766	215335	427305	151488	125371	143746	160124	437698	195675	381145	285645	258470	304781	275469	175486	185446	167697	580211	303947	190082	143894	622010
201.64	20.4306										nFla'nFlaB'PQC'UI'UIB		0	bp			x2-mer	0.07	0.16	620248	pos877	0			pos	24	448217	467007	584716	475008	416789	466296	457513	380404	489440	427338	480354	528831	459764	539336	497496	433365	480086	620248	490884	432201	405974	452163	518601
163.901	5.40522							4.41377			PQC		0	bp					1.44	620022	neg355	0			neg	14	0	0	0	0	21339.3	0	0	27837.9	0	0	97538.2	70287.8	82723.6	119338	85348.9	75509.5	67880.5	23660	620022	26053.6	0	0	28177.9
647.622	28.0216		0		0.2			0.197251	#N/A		nFla'nFlaB'PQC'UI'UIB	[SP (24:0)] N-(15Z-tetracosenoyl)-sphing-4-enine	0	bp		2.8	xC13	0.12	0.21	611298	pos907	0		H	pos	24	279835	317544	361713	222452	369976	237551	195588	200998	256289	313888	480504	482038	472605	551220	611298	246817	313968	335335	208015	232777	366248	269890	304081
283.128	12.159		0		#N/A			0.359898	#N/A	0.3942	nFla'nFlaB'PQC'UI'UIB	Ala-Gly-His	0	bp				0.25	0.25	610469	pos908	0		H	pos	24	610469	554556	506371	440776	453057	312890	446596	309822	289000	256485	543938	286029	366462	356063	467915	373595	477571	365320	343574	255768	353208	399188	319560
118.074	27.3208	C4H10N2O2	3	L-2,4-Diaminobutanoate	8	Central	KEGG_Metacyc_Lipidmaps_HMDB	-0.237765	3.8885	-0.248139	nFla'nFlaB'PQC'UI'UIB	L-2,4-Diaminobutanoate	0	bp			x-NH3	0.08	0.27	609060	pos909	0		H	pos	24	544429	609060	370270	329996	391004	464303	469268	463742	400865	373452	503617	487591	426908	535849	480288	322009	459072	409135	533451	516693	472019	372724	423283
147.053	17.3915		0		0.2			0.2182	#N/A	0.347233	nFla'nFlaB'PQC'UI	D-Glutamate	0	bp				0.17	0.83	600955	neg357	0		H	neg	24	508803	203038	185072	94780	475815	269900	188653	206891	130549	569688	424957	348406	307908	317778	272261	132265	541246	330768	106889	130618	600955	366622	82166.9
256.067	11.8581		0		#N/A			0.300826	#N/A		nFla'nFlaB'PQC'UI'UIB	L-beta-aspartyl-L-threonine	0	bp				0.22	0.22	600812	pos912	0		Na	pos	24	437466	523549	548352	459268	600812	268410	308070	304056	392140	287676	297070	371017	335358	336582	193981	383469	294766	399037	328441	227680	205383	280517	252822
272.041	15.9056		0		0.1			0.507149	#N/A		nFla'nFlaB'UI'UIB	N-(phosphonacetyl)-L-aspartate	0	bp	xK+			0.58	0.58	600528	pos913	0		NH3	pos	23	272083	264843	212788	176407	331539	261838	177063	360232	137345	299860	0	344763	345782	378466	275976	381473	369357	559402	600528	236585	315400	351831	130158
240.821	14.7235										nFla		0	bp				0.67	0.97	598257	pos914	0			pos	19	137945	354017	531533	475075	255912	154506	414973	239259	381294	0	0	280313	400559	349439	598257	313553	160308	0	423262	270515	0	0	487551
151.03	14.8109		0		0.1			-0.50989	#N/A		nFla'nFlaB'PQC'UI'UIB	methiin	0	bp	x2+			0.12	0.54	597978	neg358	0		H	neg	24	530614	295788	237607	182422	413913	522506	426396	343148	178783	459166	273039	290314	228832	228327	222463	284542	432189	396324	198827	234313	442994	597978	142528
236.129	27.5608		0		#N/A			-2.486	#N/A		nFla'nFlaB'PQC'UI'UIB	dimethylsuberimidate	0	bp				0.03	0.07	595767	neg359	0		Cl	neg	24	563027	573319	557824	511174	546227	579870	595717	567025	529837	595767	565057	533329	547672	572292	576761	521101	580195	595444	513355	525479	554399	571111	515223
95.9879	27.3596		0		#N/A			-2.37869	#N/A		nFla'nFlaB'PQC'UI'UIB	Methanesulfonic acid	0	bp				0.07	0.1	594699	neg360	0		H	neg	24	542283	536842	557662	500936	525716	525804	517037	471172	499176	578174	507469	532616	505854	504702	592696	480107	505700	508544	594699	495831	573249	516592	551829
225.148	17.3238		0		#N/A			-0.560813	#N/A		PQC	Pilocarpine	0	bp				0.21	1.31	588464	pos915	0		NH3	pos	16	0	569484	588464	127400	194621	0	184272	322451	173251	0	245476	312226	333868	345753	444583	280900	0	125650	0	157584	0	0	0
502.673	4.81669										nFla'nFlaB'PQC'UI'UIB		0	bp				0.17	0.23	587552	neg362	0			neg	24	213259	245147	241086	249926	261778	478376	341327	399496	396261	484226	482447	436164	349161	326172	364391	306701	413992	518130	520866	522374	566639	432274	587552
107.048	27.7258										nFla'nFlaB'PQC'UI'UIB		0	bp				0.31	0.66	586466	neg363	0			neg	24	368412	159762	174413	586466	148548	175817	285615	202415	226468	226132	308890	189816	207696	231651	384963	189689	179080	176705	318335	372923	394898	384085	543077
983.04	7.22087				0.1						PQC		0	bp	xC13			0.25	1.35	578636	neg364	0			neg	11	0	270941	0	0	0	241869	0	237421	0	0	578636	334271	374901	539452	372021	0	420949	169081	0	0	0	217466	0
274.2	21.1377	C12H26N4O3	1	Lys-Lys	7	0	Peptides	-0.505926	-8.98896		nFla'nFlaB'PQC'UI'UIB	Lys-Lys	0	bp				0.21	0.29	578257	pos900	0		H	pos	24	309418	308604	418792	431174	511689	238288	397340	274111	380322	303028	578257	413372	441639	333722	388044	360159	472040	274759	542437	357075	311230	251249	438209
1099.66	9.4468										nFla'nFlaB'UI'UIB		0	bp				0.64	0.64	571781	neg365	0			neg	23	440592	503374	564624	461190	371895	457445	536915	306654	430764	321474	0	396697	345850	312852	571781	358001	454140	355535	337101	457209	325191	478787	475967
385.182	18.0953										nFla'nFlaB'PQC'UI'UIB		0	bp				0.2	0.32	571211	pos917	0			pos	24	201869	297234	315201	211266	404553	421693	200179	309586	302743	477088	533775	418980	413893	346725	324330	345484	571211	413561	285770	244873	383199	229250	280155
260.03	15.9285		0		0.2			-0.805182	#N/A	-0.964243	nFla'nFlaB'PQC'UI'UIB	Hexose phosphate	0	bp				0.13	0.77	570983	neg366	0		H	negneg	24	478538	393290	283677	148573	570983	217081	193825	173748	98717	336742	329703	317842	265209	273017	240418	138402	464874	297955	153321	106938	431906	204940	73533.8
262.136	17.4639				0.1			3.45945			nFla'nFlaB'PQC'UI'UIB		0	bp	xC13			0.47	0.47	567062	pos918	0			pos	24	196004	227270	265054	331575	224372	218680	203641	233097	426623	229795	567062	189785	500690	405264	191363	281911	311197	297533	277718	179802	206157	213651	296811
648.625	3.71524										nFla'nFlaB'PQC'UI'UIB		0	bp				0.06	0.23	565278	neg368	0			neg	24	265950	309443	307665	386111	261877	386583	257794	303951	390884	367413	378088	439352	378870	394244	396077	565278	387529	366173	359622	494810	385753	385058	519258
169.05	13.569		0		0.2			0.173375	#N/A	-1.04221	nFla'nFlaB'PQC'UI'UIB	Phosphodimethylethanolamine	0	bp				0.13	0.27	562890	neg369	0		H	neg	24	185767	213031	254480	249274	228398	562890	287106	335981	447252	364622	390103	365033	356114	389619	279586	327766	349050	434664	335015	392569	372701	516618	398427
811.691	7.33541	C48H93NO8	4	Glucosylceramide	7	0	KEGG_HMDB	0.61977	45.47		nFla'nFlaB'PQC'UI'UIB	Glucosylceramide	0	bp		-0.5	xC13	0.19	0.19	562134	neg370	0		H	neg	24	517809	428493	411954	547720	434881	473453	403508	421060	496382	424204	333246	561454	501624	470878	430702	517292	489680	553759	457754	521116	474993	488684	562134
188.127	23.4228	C7H16N4O2	5	Homoarginine	8	Central	KEGG_Metacyc_HMDB	-0.361077	14.9101		nFla'nFlaB'PQC'UI'UIB	Homoarginine	0	bp				0.04	0.21	560959	pos920	0		H	pos	24	396968	444661	560959	519302	476979	342354	319707	311401	482370	349671	425100	383069	399842	407005	416675	333054	407697	434138	457319	351691	273852	263357	438226
323.283	27.6055		0		0.2			1.7089	#N/A	1.8137	nFla'nFlaB'PQC'UI'UIB	N-(9Z,12Z-octadecadienoyl)-ethanolamine	0	bp				0.16	0.27	560438	pos921	0		H	pos	24	492295	432712	452219	310470	392180	473016	405691	451519	382521	470438	560438	383039	420624	419006	413605	429195	399780	524902	323422	361163	259903	252242	349266
361.095	12.9739	C21H15NO5	1	Chelirubine	7	0	KEGG_Metacyc	-1.4232	34.1187		nFla'nFlaB'PQC'UIB	Chelirubine	0	bp				0.29	0.94	559143	pos922	0		H	pos	23	271003	363120	261842	195474	559143	228959	133160	90252.9	161697	212601	106144	226363	256532	200493	187215	0	91988.8	91990.5	243763	98250.3	84228.4	276618	84691.4
579.017	13.5285										nFla'nFlaB'UI'UIB		0	bp				0.8	0.8	558588	neg371	0			neg	23	206721	192041	437454	274287	190340	224716	388578	157083	233757	172319	0	179231	289017	234530	558588	236393	320313	283430	219400	167550	136706	360301	340791
468.021	14.8924				0.1						nFla'nFlaB'UI'UIB		0	bp	xK+			0.57	0.57	558252	pos923	0			pos	23	227012	166172	162566	96849.8	282944	316181	319284	231747	162305	255527	0	207718	233721	189098	229847	286218	450573	558252	206418	237174	391301	438325	202448
416.042	15.8643										nFla'nFlaB'PQC'UI'UIB		0	bp				0.21	0.21	557633	neg372	0			neg	24	318557	377862	480826	384265	336541	330843	364729	302893	422939	376456	557633	432328	324209	394404	378406	290217	363029	412121	416037	310613	293878	363502	342885
864.569	3.54731							-4.27965			nFla'nFlaB'PQC'UI'UIB		0	bp				0.17	0.2	554364	neg374	0			neg	24	325002	421021	382967	404407	554364	289800	404046	504625	432366	476776	373640	329612	330423	294935	231305	482359	447438	531780	439268	395177	360404	439003	430753
405.138	18.4864	C15H23N3O10	1	Glu-Glu-Glu	7	0	Peptides	0.34416	13.45		nFla'nFlaB'PQC'UI'UIB	Glu-Glu-Glu	0	bp				0.05	0.27	553891	pos916	0		H	pos	24	368613	354764	337243	245478	335137	213548	177834	355576	250930	276827	539075	504336	500090	501050	465478	385734	553891	502234	457710	283385	356419	363028	314124
[truncated: 567 more rows]
[truncated: 12 more columns]
